# Supplementary material
Source: publisher figshare collection journal article supplement (https://rs.figshare.com/ndownloader/files/34495236)
Supplement: Supplementary file 1 [file 34495236]

OTU	Size	Tax_Level_1	Tax_Level_2	Tax_Level_3	Tax_Level_4	Tax_Level_5	Tax_Level_6	Tax_Level_7	Tax_Level_8
Otu0001	343492	Eukaryota(100)	Eukaryota_unclassified(100)	Eukaryota_unclassified(100)	Eukaryota_unclassified(100)	Eukaryota_unclassified(100)	Eukaryota_unclassified(100)	Eukaryota_unclassified(100)	Eukaryota_unclassified(100)
Otu0002	289824	Eukaryota(100)	Alveolata(100)	Dinoflagellata(100)	Dinophyceae(100)	Gonyaulacales(100)	Goniodomataceae(100)	Alexandrium(100)	Alexandrium_fundyense(100)
Otu0003	288787	Eukaryota(100)	Eukaryota_unclassified(100)	Eukaryota_unclassified(100)	Eukaryota_unclassified(100)	Eukaryota_unclassified(100)	Eukaryota_unclassified(100)	Eukaryota_unclassified(100)	Eukaryota_unclassified(100)
Otu0004	226212	Eukaryota(100)	Stramenopiles(100)	Ochrophyta(100)	Bacillariophyta(100)	Bacillariophyta_X(100)	Polar-centric-Mediophyceae(100)	Chaetoceros(100)	Chaetoceros_unclassified(100)
Otu0005	220377	Eukaryota(100)	Opisthokonta(100)	Metazoa(100)	Nematoda(100)	Chromadorea(100)	Chromadorea_X(100)	Strongyloides(100)	Strongyloides_procyonis(100)
Otu0006	171184	Eukaryota(100)	Opisthokonta(100)	Metazoa(100)	Craniata(100)	Craniata_X(100)	Mammalia(100)	Mammalia_unclassified(100)	Mammalia_unclassified(100)
Otu0007	153373	Eukaryota(100)	Eukaryota_unclassified(100)	Eukaryota_unclassified(100)	Eukaryota_unclassified(100)	Eukaryota_unclassified(100)	Eukaryota_unclassified(100)	Eukaryota_unclassified(100)	Eukaryota_unclassified(100)
Otu0008	97059	Eukaryota(100)	Alveolata(100)	Apicomplexa(100)	Coccidiomorphea(100)	Eimeriida(100)	Sarcocystidae(100)	Sarcocystidae_unclassified(100)	Sarcocystidae_unclassified(100)
Otu0009	65803	Eukaryota(100)	Eukaryota_unclassified(100)	Eukaryota_unclassified(100)	Eukaryota_unclassified(100)	Eukaryota_unclassified(100)	Eukaryota_unclassified(100)	Eukaryota_unclassified(100)	Eukaryota_unclassified(100)
Otu0010	49816	Eukaryota(100)	Stramenopiles(100)	Pseudofungi(100)	MAST-1(100)	MAST-1C(100)	MAST-1C_X(100)	MAST-1C_XX(100)	MAST-1C_XX_sp.(100)
Otu0011	35427	Eukaryota(100)	Opisthokonta(100)	Metazoa(100)	Platyhelminthes(100)	Trematoda(100)	Digenea(100)	Digenea_unclassified(100)	Digenea_unclassified(100)
Otu0012	27898	Eukaryota(100)	Eukaryota_unclassified(100)	Eukaryota_unclassified(100)	Eukaryota_unclassified(100)	Eukaryota_unclassified(100)	Eukaryota_unclassified(100)	Eukaryota_unclassified(100)	Eukaryota_unclassified(100)
Otu0013	26336	Eukaryota(100)	Eukaryota_unclassified(100)	Eukaryota_unclassified(100)	Eukaryota_unclassified(100)	Eukaryota_unclassified(100)	Eukaryota_unclassified(100)	Eukaryota_unclassified(100)	Eukaryota_unclassified(100)
Otu0014	20605	Eukaryota(100)	Opisthokonta(100)	Metazoa(100)	Platyhelminthes(100)	Trematoda(100)	Digenea(100)	Digenea_unclassified(100)	Digenea_unclassified(100)
Otu0015	18011	Eukaryota(100)	Eukaryota_unclassified(100)	Eukaryota_unclassified(100)	Eukaryota_unclassified(100)	Eukaryota_unclassified(100)	Eukaryota_unclassified(100)	Eukaryota_unclassified(100)	Eukaryota_unclassified(100)
Otu0016	16851	Eukaryota(100)	Opisthokonta(100)	Metazoa(100)	Nematoda(100)	Chromadorea(100)	Chromadorea_X(100)	Chromadorea_X_unclassified(100)	Chromadorea_X_unclassified(100)
Otu0017	16210	Eukaryota(100)	Opisthokonta(100)	Metazoa(100)	Mollusca(100)	Gastropoda(100)	Nudibranchia(100)	Nudibranchia_unclassified(100)	Nudibranchia_unclassified(100)
Otu0018	13797	Eukaryota(100)	Alveolata(100)	Dinoflagellata(100)	Dinophyceae(100)	Gonyaulacales(100)	Goniodomataceae(100)	Alexandrium(100)	Alexandrium_fundyense(84)
Otu0019	13741	Eukaryota(100)	Eukaryota_unclassified(100)	Eukaryota_unclassified(100)	Eukaryota_unclassified(100)	Eukaryota_unclassified(100)	Eukaryota_unclassified(100)	Eukaryota_unclassified(100)	Eukaryota_unclassified(100)
Otu0020	13610	Eukaryota(100)	Opisthokonta(100)	Metazoa(100)	Mollusca(100)	Bivalvia(100)	Heteroconchia(100)	Vasticardium(100)	Vasticardium_enode(100)
Otu0021	9900	Eukaryota(100)	Eukaryota_unclassified(100)	Eukaryota_unclassified(100)	Eukaryota_unclassified(100)	Eukaryota_unclassified(100)	Eukaryota_unclassified(100)	Eukaryota_unclassified(100)	Eukaryota_unclassified(100)
Otu0022	9751	Eukaryota(100)	Opisthokonta(100)	Metazoa(100)	Craniata(100)	Craniata_X(100)	Mammalia(99)	Mammalia_unclassified(99)	Mammalia_unclassified(99)
Otu0023	9510	Eukaryota(100)	Alveolata(100)	Ciliophora(100)	Spirotrichea(100)	Strombidiida_G(86)	Strombidiida_G_X(86)	Strombidiida_G_XX(86)	Strombidiida_G_XX_sp.(86)
Otu0024	8294	Eukaryota(100)	Eukaryota_unclassified(100)	Eukaryota_unclassified(100)	Eukaryota_unclassified(100)	Eukaryota_unclassified(100)	Eukaryota_unclassified(100)	Eukaryota_unclassified(100)	Eukaryota_unclassified(100)
Otu0025	8028	Eukaryota(100)	Eukaryota_unclassified(100)	Eukaryota_unclassified(100)	Eukaryota_unclassified(100)	Eukaryota_unclassified(100)	Eukaryota_unclassified(100)	Eukaryota_unclassified(100)	Eukaryota_unclassified(100)
Otu0026	7282	Eukaryota(100)	Eukaryota_unclassified(100)	Eukaryota_unclassified(100)	Eukaryota_unclassified(100)	Eukaryota_unclassified(100)	Eukaryota_unclassified(100)	Eukaryota_unclassified(100)	Eukaryota_unclassified(100)
Otu0027	7115	Eukaryota(100)	Opisthokonta(100)	Metazoa(100)	Arthropoda(100)	Crustacea(100)	Maxillopoda(100)	Centropages(100)	Centropages_unclassified(100)
Otu0028	5354	Eukaryota(100)	Archaeplastida(100)	Streptophyta(100)	Embryophyceae(100)	Embryophyceae_X(100)	Embryophyceae_XX(100)	Embryophyceae_XX_unclassified(100)	Embryophyceae_XX_unclassified(100)
Otu0029	5326	Eukaryota(100)	Eukaryota_unclassified(100)	Eukaryota_unclassified(100)	Eukaryota_unclassified(100)	Eukaryota_unclassified(100)	Eukaryota_unclassified(100)	Eukaryota_unclassified(100)	Eukaryota_unclassified(100)
Otu0030	5209	Eukaryota(100)	Alveolata(100)	Dinoflagellata(100)	Dinophyceae(100)	Dinophyceae_unclassified(100)	Dinophyceae_unclassified(100)	Dinophyceae_unclassified(100)	Dinophyceae_unclassified(100)
Otu0031	4738	Eukaryota(100)	Eukaryota_unclassified(100)	Eukaryota_unclassified(100)	Eukaryota_unclassified(100)	Eukaryota_unclassified(100)	Eukaryota_unclassified(100)	Eukaryota_unclassified(100)	Eukaryota_unclassified(100)
Otu0032	4532	Eukaryota(100)	Opisthokonta(100)	Metazoa(100)	Mollusca(100)	Bivalvia(100)	Heteroconchia(100)	Hiatella(100)	Hiatella_arctica(100)
Otu0033	4183	Eukaryota(100)	Archaeplastida(100)	Chlorophyta(100)	Pyramimonadales(100)	Pyramimonadales_X(100)	Pyramimonadales_XX(100)	Pyramimonas(100)	Pyramimonas_unclassified(100)
Otu0034	3951	Eukaryota(100)	Eukaryota_unclassified(95)	Eukaryota_unclassified(95)	Eukaryota_unclassified(95)	Eukaryota_unclassified(95)	Eukaryota_unclassified(95)	Eukaryota_unclassified(95)	Eukaryota_unclassified(95)
Otu0035	3945	Eukaryota(100)	Opisthokonta(100)	Metazoa(100)	Arthropoda(100)	Crustacea(100)	Maxillopoda(100)	Maxillopoda_unclassified(100)	Maxillopoda_unclassified(100)
Otu0036	3919	Eukaryota(100)	Alveolata(100)	Dinoflagellata(100)	Dinophyceae(100)	Peridiniales(100)	Protoperidiniaceae(100)	Protoperidinium(100)	Protoperidinium_punctulatum(100)
Otu0037	3905	Eukaryota(100)	Opisthokonta(100)	Metazoa(100)	Mollusca(100)	Bivalvia(100)	Heteroconchia(100)	Vasticardium(100)	Vasticardium_enode(100)
Otu0038	3614	Eukaryota(100)	Opisthokonta(100)	Fungi(100)	Ascomycota(100)	Saccharomycotina(100)	Saccharomycetales(100)	Saccharomycetales_unclassified(100)	Saccharomycetales_unclassified(100)
Otu0039	3512	Eukaryota(100)	Eukaryota_unclassified(100)	Eukaryota_unclassified(100)	Eukaryota_unclassified(100)	Eukaryota_unclassified(100)	Eukaryota_unclassified(100)	Eukaryota_unclassified(100)	Eukaryota_unclassified(100)
Otu0040	3461	Eukaryota(100)	Stramenopiles(100)	Ochrophyta(100)	Phaeophyceae(100)	Phaeophyceae_X(100)	Phaeophyceae_XX(100)	Phaeophyceae_XX_unclassified(100)	Phaeophyceae_XX_unclassified(100)
Otu0041	3409	Eukaryota(100)	Eukaryota_unclassified(100)	Eukaryota_unclassified(100)	Eukaryota_unclassified(100)	Eukaryota_unclassified(100)	Eukaryota_unclassified(100)	Eukaryota_unclassified(100)	Eukaryota_unclassified(100)
Otu0042	3374	Eukaryota(100)	Opisthokonta(100)	Metazoa(100)	Platyhelminthes(100)	Cestoda(100)	Eucestoda(100)	Diphyllobothrium(100)	Diphyllobothrium_latum(100)
Otu0043	3302	Eukaryota(100)	Eukaryota_unclassified(100)	Eukaryota_unclassified(100)	Eukaryota_unclassified(100)	Eukaryota_unclassified(100)	Eukaryota_unclassified(100)	Eukaryota_unclassified(100)	Eukaryota_unclassified(100)
Otu0044	3242	Eukaryota(100)	Opisthokonta(100)	Metazoa(100)	Craniata(100)	Craniata_X(100)	Teleostei(100)	Teleostei_unclassified(100)	Teleostei_unclassified(100)
Otu0045	3229	Eukaryota(100)	Eukaryota_unclassified(100)	Eukaryota_unclassified(100)	Eukaryota_unclassified(100)	Eukaryota_unclassified(100)	Eukaryota_unclassified(100)	Eukaryota_unclassified(100)	Eukaryota_unclassified(100)
Otu0046	3209	Eukaryota(100)	Eukaryota_unclassified(90)	Eukaryota_unclassified(90)	Eukaryota_unclassified(90)	Eukaryota_unclassified(90)	Eukaryota_unclassified(90)	Eukaryota_unclassified(90)	Eukaryota_unclassified(90)
Otu0047	3159	Eukaryota(100)	Stramenopiles(100)	Sagenista(100)	Labyrinthulomycetes(100)	Labyrinthulomycetes_unclassified(100)	Labyrinthulomycetes_unclassified(100)	Labyrinthulomycetes_unclassified(100)	Labyrinthulomycetes_unclassified(100)
Otu0048	3150	Eukaryota(100)	Stramenopiles(100)	Ochrophyta(100)	Bacillariophyta(100)	Bacillariophyta_X(100)	Polar-centric-Mediophyceae(100)	Polar-centric-Mediophyceae_unclassified(100)	Polar-centric-Mediophyceae_unclassified(100)
Otu0049	3130	Eukaryota(100)	Eukaryota_unclassified(100)	Eukaryota_unclassified(100)	Eukaryota_unclassified(100)	Eukaryota_unclassified(100)	Eukaryota_unclassified(100)	Eukaryota_unclassified(100)	Eukaryota_unclassified(100)
Otu0050	3062	Eukaryota(100)	Eukaryota_unclassified(100)	Eukaryota_unclassified(100)	Eukaryota_unclassified(100)	Eukaryota_unclassified(100)	Eukaryota_unclassified(100)	Eukaryota_unclassified(100)	Eukaryota_unclassified(100)
Otu0051	2782	Eukaryota(100)	Stramenopiles(100)	Ochrophyta(100)	Bacillariophyta(100)	Bacillariophyta_X(100)	Polar-centric-Mediophyceae(100)	Chaetoceros(100)	Chaetoceros_contortus(100)
Otu0052	2770	Eukaryota(100)	Rhizaria(100)	Cercozoa(100)	Filosa-Thecofilosea(100)	Ebriida(100)	Ebriidae(100)	Ebria(100)	Ebria_tripartita(100)
Otu0053	2768	Eukaryota(100)	Rhizaria(100)	Cercozoa(100)	Filosa-Thecofilosea(100)	Cryomonadida(100)	Cryothecomonas-lineage(100)	Cryothecomonas(100)	Cryothecomonas_aestivalis(100)
Otu0054	2629	Eukaryota(100)	Opisthokonta(100)	Metazoa(100)	Arthropoda(100)	Crustacea(100)	Maxillopoda(100)	Neocalanus(100)	Neocalanus_cristatus(100)
Otu0055	2582	Eukaryota(100)	Eukaryota_unclassified(100)	Eukaryota_unclassified(100)	Eukaryota_unclassified(100)	Eukaryota_unclassified(100)	Eukaryota_unclassified(100)	Eukaryota_unclassified(100)	Eukaryota_unclassified(100)
Otu0056	2422	Eukaryota(100)	Eukaryota_unclassified(100)	Eukaryota_unclassified(100)	Eukaryota_unclassified(100)	Eukaryota_unclassified(100)	Eukaryota_unclassified(100)	Eukaryota_unclassified(100)	Eukaryota_unclassified(100)
Otu0057	2402	Eukaryota(100)	Eukaryota_unclassified(100)	Eukaryota_unclassified(100)	Eukaryota_unclassified(100)	Eukaryota_unclassified(100)	Eukaryota_unclassified(100)	Eukaryota_unclassified(100)	Eukaryota_unclassified(100)
Otu0058	2250	Eukaryota(100)	Stramenopiles(100)	Ochrophyta(100)	Bacillariophyta(100)	Bacillariophyta_X(100)	Polar-centric-Mediophyceae(100)	Chaetoceros(100)	Chaetoceros_unclassified(99)
Otu0059	2214	Eukaryota(100)	Eukaryota_unclassified(100)	Eukaryota_unclassified(100)	Eukaryota_unclassified(100)	Eukaryota_unclassified(100)	Eukaryota_unclassified(100)	Eukaryota_unclassified(100)	Eukaryota_unclassified(100)
Otu0060	2176	Eukaryota(100)	Eukaryota_unclassified(100)	Eukaryota_unclassified(100)	Eukaryota_unclassified(100)	Eukaryota_unclassified(100)	Eukaryota_unclassified(100)	Eukaryota_unclassified(100)	Eukaryota_unclassified(100)
Otu0061	1978	Eukaryota(100)	Eukaryota_unclassified(100)	Eukaryota_unclassified(100)	Eukaryota_unclassified(100)	Eukaryota_unclassified(100)	Eukaryota_unclassified(100)	Eukaryota_unclassified(100)	Eukaryota_unclassified(100)
Otu0062	1941	Eukaryota(100)	Alveolata(100)	Dinoflagellata(100)	Dinophyceae(100)	Peridiniales(100)	Amphidiniopsidaceae(100)	Islandinium(100)	Islandinium_minutum(100)
Otu0063	1933	Eukaryota(100)	Rhizaria(100)	Cercozoa(100)	Filosa-Imbricatea(100)	Thaumatomonadida(100)	Thaumatomonadida_unclassified(92)	Thaumatomonadida_unclassified(92)	Thaumatomonadida_unclassified(92)
Otu0064	1903	Eukaryota(100)	Opisthokonta(100)	Metazoa(100)	Myxozoa(100)	Myxozoa_X(100)	Myxosporea(100)	Ortholinea(100)	Ortholinea_orientalis(100)
Otu0065	1893	Eukaryota(100)	Stramenopiles(100)	Pseudofungi(100)	MAST-1(100)	MAST-1C(100)	MAST-1C_X(100)	MAST-1C_XX(100)	MAST-1C_XX_sp.(100)
Otu0066	1882	Eukaryota(100)	Archaeplastida(100)	Chlorophyta(100)	Mamiellophyceae(100)	Dolichomastigales(100)	Dolichomastigales_unclassified(99)	Dolichomastigales_unclassified(99)	Dolichomastigales_unclassified(99)
Otu0067	1868	Eukaryota(100)	Eukaryota_unclassified(100)	Eukaryota_unclassified(100)	Eukaryota_unclassified(100)	Eukaryota_unclassified(100)	Eukaryota_unclassified(100)	Eukaryota_unclassified(100)	Eukaryota_unclassified(100)
Otu0068	1832	Eukaryota(100)	Opisthokonta(100)	Metazoa(100)	Craniata(100)	Craniata_X(100)	Craniata_X_unclassified(100)	Craniata_X_unclassified(100)	Craniata_X_unclassified(100)
Otu0069	1800	Eukaryota(100)	Opisthokonta(100)	Metazoa(100)	Mollusca(100)	Bivalvia(100)	Heteroconchia(100)	Macoma(100)	Macoma_nasuta(100)
Otu0070	1793	Eukaryota(100)	Alveolata(100)	Dinoflagellata(100)	Dinophyceae(100)	Gonyaulacales(100)	Protoceratiaceae(100)	Protoceratium(100)	Protoceratium_reticulatum(100)
Otu0071	1747	Eukaryota(100)	Opisthokonta(100)	Metazoa(100)	Annelida(100)	Annelida_X(100)	Annelida_XX(100)	Nephtys(100)	Nephtys_unclassified(100)
Otu0072	1733	Eukaryota(100)	Rhizaria(100)	Cercozoa(100)	Filosa-Thecofilosea(100)	Ventricleftida(100)	CCW10-lineage(100)	CCW10-lineage_X(100)	CCW10-lineage_X_sp.(100)
Otu0073	1725	Eukaryota(100)	Opisthokonta(100)	Metazoa(100)	Arthropoda(100)	Crustacea(100)	Maxillopoda(100)	Pseudocalanus(100)	Pseudocalanus_unclassified(100)
Otu0074	1695	Eukaryota(100)	Rhizaria(100)	Cercozoa(100)	Filosa-Thecofilosea(100)	Cryomonadida(100)	Cryomonadida_unclassified(100)	Cryomonadida_unclassified(100)	Cryomonadida_unclassified(100)
Otu0075	1670	Eukaryota(100)	Archaeplastida(100)	Chlorophyta(100)	Mamiellophyceae(100)	Mamiellales(100)	Mamiellaceae(100)	Mantoniella(100)	Mantoniella_unclassified(100)
Otu0076	1621	Eukaryota(100)	Eukaryota_unclassified(100)	Eukaryota_unclassified(100)	Eukaryota_unclassified(100)	Eukaryota_unclassified(100)	Eukaryota_unclassified(100)	Eukaryota_unclassified(100)	Eukaryota_unclassified(100)
Otu0077	1608	Eukaryota(100)	Alveolata(100)	Dinoflagellata(100)	Dinophyceae(100)	Peridiniales(100)	Thoracosphaeraceae(100)	Thoracosphaeraceae_unclassified(100)	Thoracosphaeraceae_unclassified(100)
Otu0078	1596	Eukaryota(100)	Alveolata(100)	Dinoflagellata(100)	Dinophyceae(100)	Peridiniales(100)	Thoracosphaeraceae(100)	Thoracosphaeraceae_unclassified(100)	Thoracosphaeraceae_unclassified(100)
Otu0079	1509	Eukaryota(100)	Stramenopiles(100)	Ochrophyta(100)	Bacillariophyta(100)	Bacillariophyta_X(100)	Bacillariophyta_X_unclassified(100)	Bacillariophyta_X_unclassified(100)	Bacillariophyta_X_unclassified(100)
Otu0080	1406	Eukaryota(100)	Archaeplastida(100)	Streptophyta(100)	Embryophyceae(100)	Embryophyceae_X(100)	Embryophyceae_XX(100)	Embryophyceae_XX_unclassified(100)	Embryophyceae_XX_unclassified(100)
Otu0081	1375	Eukaryota(100)	Eukaryota_unclassified(100)	Eukaryota_unclassified(100)	Eukaryota_unclassified(100)	Eukaryota_unclassified(100)	Eukaryota_unclassified(100)	Eukaryota_unclassified(100)	Eukaryota_unclassified(100)
Otu0082	1367	Eukaryota(100)	Alveolata(100)	Dinoflagellata(100)	Dinophyceae(100)	Gymnodiniales(94)	Gymnodiniales_unclassified(94)	Gymnodiniales_unclassified(94)	Gymnodiniales_unclassified(94)
Otu0083	1333	Eukaryota(100)	Eukaryota_unclassified(100)	Eukaryota_unclassified(100)	Eukaryota_unclassified(100)	Eukaryota_unclassified(100)	Eukaryota_unclassified(100)	Eukaryota_unclassified(100)	Eukaryota_unclassified(100)
Otu0084	1331	Eukaryota(100)	Alveolata(100)	Dinoflagellata(100)	Dinophyceae(100)	Dinophyceae_unclassified(100)	Dinophyceae_unclassified(100)	Dinophyceae_unclassified(100)	Dinophyceae_unclassified(100)
Otu0085	1311	Eukaryota(100)	Eukaryota_unclassified(100)	Eukaryota_unclassified(100)	Eukaryota_unclassified(100)	Eukaryota_unclassified(100)	Eukaryota_unclassified(100)	Eukaryota_unclassified(100)	Eukaryota_unclassified(100)
Otu0086	1307	Eukaryota(100)	Alveolata(100)	Dinoflagellata(100)	Dinophyceae(100)	Gymnodiniales(100)	Gymnodiniaceae(67)	Gymnodinium(65)	Gymnodinium_unclassified(65)
Otu0087	1297	Eukaryota(100)	Eukaryota_unclassified(100)	Eukaryota_unclassified(100)	Eukaryota_unclassified(100)	Eukaryota_unclassified(100)	Eukaryota_unclassified(100)	Eukaryota_unclassified(100)	Eukaryota_unclassified(100)
Otu0088	1183	Eukaryota(100)	Eukaryota_unclassified(100)	Eukaryota_unclassified(100)	Eukaryota_unclassified(100)	Eukaryota_unclassified(100)	Eukaryota_unclassified(100)	Eukaryota_unclassified(100)	Eukaryota_unclassified(100)
Otu0089	1166	Eukaryota(100)	Eukaryota_unclassified(100)	Eukaryota_unclassified(100)	Eukaryota_unclassified(100)	Eukaryota_unclassified(100)	Eukaryota_unclassified(100)	Eukaryota_unclassified(100)	Eukaryota_unclassified(100)
Otu0090	1157	Eukaryota(100)	Alveolata(100)	Dinoflagellata(100)	Dinophyceae(100)	Dinophyceae_unclassified(87)	Dinophyceae_unclassified(87)	Dinophyceae_unclassified(87)	Dinophyceae_unclassified(87)
Otu0091	1116	Eukaryota(100)	Eukaryota_unclassified(100)	Eukaryota_unclassified(100)	Eukaryota_unclassified(100)	Eukaryota_unclassified(100)	Eukaryota_unclassified(100)	Eukaryota_unclassified(100)	Eukaryota_unclassified(100)
Otu0092	1086	Eukaryota(100)	Archaeplastida(100)	Chlorophyta(99)	Pyramimonadales(99)	Pyramimonadales_X(99)	Pyramimonadales_XX(99)	Pterosperma(81)	Pterosperma_cristatum(81)
Otu0093	1066	Eukaryota(100)	Stramenopiles(100)	Ochrophyta(100)	Bacillariophyta(100)	Bacillariophyta_X(100)	Polar-centric-Mediophyceae(100)	Chaetoceros(100)	Chaetoceros_radicans(100)
Otu0094	1016	Eukaryota(100)	Eukaryota_unclassified(100)	Eukaryota_unclassified(100)	Eukaryota_unclassified(100)	Eukaryota_unclassified(100)	Eukaryota_unclassified(100)	Eukaryota_unclassified(100)	Eukaryota_unclassified(100)
Otu0095	976	Eukaryota(100)	Rhizaria(100)	Cercozoa(100)	Filosa-Thecofilosea(100)	Filosa-Thecofilosea_X(100)	Mataza-lineage(100)	Mataza(100)	Mataza_hastifera(100)
Otu0096	958	Eukaryota(100)	Alveolata(100)	Dinoflagellata(100)	Dinophyceae(100)	Dinophyceae_unclassified(100)	Dinophyceae_unclassified(100)	Dinophyceae_unclassified(100)	Dinophyceae_unclassified(100)
Otu0097	947	Eukaryota(100)	Eukaryota_unclassified(100)	Eukaryota_unclassified(100)	Eukaryota_unclassified(100)	Eukaryota_unclassified(100)	Eukaryota_unclassified(100)	Eukaryota_unclassified(100)	Eukaryota_unclassified(100)
Otu0098	930	Eukaryota(100)	Alveolata(100)	Ciliophora(100)	Ciliophora_unclassified(100)	Ciliophora_unclassified(100)	Ciliophora_unclassified(100)	Ciliophora_unclassified(100)	Ciliophora_unclassified(100)
Otu0099	919	Eukaryota(100)	Eukaryota_unclassified(100)	Eukaryota_unclassified(100)	Eukaryota_unclassified(100)	Eukaryota_unclassified(100)	Eukaryota_unclassified(100)	Eukaryota_unclassified(100)	Eukaryota_unclassified(100)
Otu0100	893	Eukaryota(100)	Opisthokonta(100)	Metazoa(100)	Arthropoda(100)	Crustacea(100)	Maxillopoda(100)	Maxillopoda_unclassified(100)	Maxillopoda_unclassified(100)
Otu0101	876	Eukaryota(100)	Stramenopiles(100)	Ochrophyta(100)	Bacillariophyta(100)	Bacillariophyta_X(100)	Polar-centric-Mediophyceae(100)	Chaetoceros(100)	Chaetoceros_cinctus(100)
Otu0102	857	Eukaryota(100)	Opisthokonta(100)	Fungi(100)	Chytridiomycota(100)	Chytridiomycotina(100)	Chytridiomycetes(100)	Zygorhizidium(100)	Zygorhizidium_sp.(100)
Otu0103	855	Eukaryota(100)	Eukaryota_unclassified(100)	Eukaryota_unclassified(100)	Eukaryota_unclassified(100)	Eukaryota_unclassified(100)	Eukaryota_unclassified(100)	Eukaryota_unclassified(100)	Eukaryota_unclassified(100)
Otu0104	809	Eukaryota(100)	Stramenopiles(95)	Stramenopiles_unclassified(95)	Stramenopiles_unclassified(95)	Stramenopiles_unclassified(95)	Stramenopiles_unclassified(95)	Stramenopiles_unclassified(95)	Stramenopiles_unclassified(95)
Otu0105	789	Eukaryota(100)	Eukaryota_unclassified(100)	Eukaryota_unclassified(100)	Eukaryota_unclassified(100)	Eukaryota_unclassified(100)	Eukaryota_unclassified(100)	Eukaryota_unclassified(100)	Eukaryota_unclassified(100)
Otu0106	775	Eukaryota(100)	Alveolata(100)	Ciliophora(100)	Spirotrichea(100)	Tintinnida(100)	Dictyocystidae(66)	Dictyocysta(66)	Dictyocysta_sp.(66)
Otu0107	774	Eukaryota(100)	Eukaryota_unclassified(100)	Eukaryota_unclassified(100)	Eukaryota_unclassified(100)	Eukaryota_unclassified(100)	Eukaryota_unclassified(100)	Eukaryota_unclassified(100)	Eukaryota_unclassified(100)
Otu0108	767	Eukaryota(100)	Alveolata(100)	Ciliophora(100)	Spirotrichea(100)	Strombidiida(100)	Strombidiidae_K(100)	Strombidium_K(100)	Strombidium_K_sp.(100)
Otu0109	740	Eukaryota(100)	Archaeplastida(100)	Streptophyta(100)	Embryophyceae(100)	Embryophyceae_X(100)	Embryophyceae_XX(100)	Embryophyceae_XX_unclassified(100)	Embryophyceae_XX_unclassified(100)
Otu0110	721	Eukaryota(100)	Opisthokonta(100)	Metazoa(100)	Arthropoda(100)	Crustacea(100)	Maxillopoda(100)	Maxillopoda_unclassified(100)	Maxillopoda_unclassified(100)
Otu0111	720	Eukaryota(100)	Opisthokonta(100)	Metazoa(100)	Arthropoda(100)	Arthropoda_unclassified(86)	Arthropoda_unclassified(86)	Arthropoda_unclassified(86)	Arthropoda_unclassified(86)
Otu0112	718	Eukaryota(100)	Opisthokonta(100)	Metazoa(100)	Mollusca(100)	Gastropoda(100)	Nudibranchia(100)	Nudibranchia_unclassified(100)	Nudibranchia_unclassified(100)
Otu0113	716	Eukaryota(100)	Eukaryota_unclassified(100)	Eukaryota_unclassified(100)	Eukaryota_unclassified(100)	Eukaryota_unclassified(100)	Eukaryota_unclassified(100)	Eukaryota_unclassified(100)	Eukaryota_unclassified(100)
Otu0114	714	Eukaryota(100)	Rhizaria(100)	Cercozoa(100)	Filosa-Thecofilosea(100)	Filosa-Thecofilosea_X(100)	Mataza-lineage(100)	Mataza-lineage_unclassified(100)	Mataza-lineage_unclassified(100)
Otu0115	704	Eukaryota(100)	Opisthokonta(100)	Metazoa(100)	Acanthocephala(100)	Acanthocephala_X(100)	Acanthocephala_XX(100)	Corynosoma(78)	Corynosoma_unclassified(78)
Otu0116	701	Eukaryota(100)	Alveolata(100)	Dinoflagellata(100)	Dinophyceae(100)	Suessiales(100)	Suessiaceae(100)	Ansanella(100)	Ansanella_granifera(100)
Otu0117	697	Eukaryota(100)	Opisthokonta(100)	Metazoa(100)	Platyhelminthes(100)	Trematoda(100)	Digenea(100)	Digenea_unclassified(100)	Digenea_unclassified(100)
Otu0118	686	Eukaryota(100)	Rhizaria(100)	Cercozoa(100)	Filosa-Thecofilosea(100)	Cryomonadida(97)	Protaspa-lineage(96)	Protaspa-lineage_unclassified(96)	Protaspa-lineage_unclassified(96)
Otu0119	682	Eukaryota(100)	Rhizaria(97)	Cercozoa(96)	Filosa-Thecofilosea(96)	Cryomonadida(96)	Cryomonadida_unclassified(96)	Cryomonadida_unclassified(96)	Cryomonadida_unclassified(96)
Otu0120	680	Eukaryota(100)	Opisthokonta(100)	Metazoa(100)	Mollusca(100)	Gastropoda(100)	Nudibranchia(100)	Nudibranchia_unclassified(100)	Nudibranchia_unclassified(100)
Otu0121	673	Eukaryota(100)	Eukaryota_unclassified(100)	Eukaryota_unclassified(100)	Eukaryota_unclassified(100)	Eukaryota_unclassified(100)	Eukaryota_unclassified(100)	Eukaryota_unclassified(100)	Eukaryota_unclassified(100)
Otu0122	667	Eukaryota(100)	Eukaryota_unclassified(100)	Eukaryota_unclassified(100)	Eukaryota_unclassified(100)	Eukaryota_unclassified(100)	Eukaryota_unclassified(100)	Eukaryota_unclassified(100)	Eukaryota_unclassified(100)
Otu0123	662	Eukaryota(100)	Eukaryota_unclassified(100)	Eukaryota_unclassified(100)	Eukaryota_unclassified(100)	Eukaryota_unclassified(100)	Eukaryota_unclassified(100)	Eukaryota_unclassified(100)	Eukaryota_unclassified(100)
Otu0124	654	Eukaryota(100)	Stramenopiles(100)	Ochrophyta(100)	Bacillariophyta(100)	Bacillariophyta_X(100)	Polar-centric-Mediophyceae(100)	Polar-centric-Mediophyceae_unclassified(100)	Polar-centric-Mediophyceae_unclassified(100)
Otu0125	650	Eukaryota(100)	Archaeplastida(100)	Streptophyta(100)	Embryophyceae(100)	Embryophyceae_X(100)	Embryophyceae_XX(100)	Rosulabryum(99)	Rosulabryum_capillare(99)
Otu0126	630	Eukaryota(100)	Eukaryota_unclassified(100)	Eukaryota_unclassified(100)	Eukaryota_unclassified(100)	Eukaryota_unclassified(100)	Eukaryota_unclassified(100)	Eukaryota_unclassified(100)	Eukaryota_unclassified(100)
Otu0127	623	Eukaryota(100)	Stramenopiles(100)	Ochrophyta(100)	Bacillariophyta(100)	Bacillariophyta_X(100)	Raphid-pennate(100)	Nitzschia(100)	Nitzschia_unclassified(100)
Otu0128	612	Eukaryota(100)	Eukaryota_unclassified(100)	Eukaryota_unclassified(100)	Eukaryota_unclassified(100)	Eukaryota_unclassified(100)	Eukaryota_unclassified(100)	Eukaryota_unclassified(100)	Eukaryota_unclassified(100)
Otu0129	580	Eukaryota(100)	Rhizaria(99)	Cercozoa(99)	Filosa-Thecofilosea(99)	Cryomonadida(99)	Cryomonadida_unclassified(99)	Cryomonadida_unclassified(99)	Cryomonadida_unclassified(99)
Otu0130	580	Eukaryota(100)	Eukaryota_unclassified(100)	Eukaryota_unclassified(100)	Eukaryota_unclassified(100)	Eukaryota_unclassified(100)	Eukaryota_unclassified(100)	Eukaryota_unclassified(100)	Eukaryota_unclassified(100)
Otu0131	574	Eukaryota(100)	Eukaryota_unclassified(100)	Eukaryota_unclassified(100)	Eukaryota_unclassified(100)	Eukaryota_unclassified(100)	Eukaryota_unclassified(100)	Eukaryota_unclassified(100)	Eukaryota_unclassified(100)
Otu0132	569	Eukaryota(100)	Hacrobia(100)	Cryptophyta(100)	Cryptophyceae(100)	Cryptomonadales(100)	Cryptomonadales_X(100)	Cryptomonadales_X_unclassified(100)	Cryptomonadales_X_unclassified(100)
Otu0133	563	Eukaryota(100)	Alveolata(100)	Ciliophora(100)	Oligohymenophorea(100)	Hymenostomatia(100)	Tetrahymenida(100)	Tetrahymena(100)	Tetrahymena_unclassified(100)
Otu0134	560	Eukaryota(100)	Opisthokonta(100)	Metazoa(100)	Arthropoda(100)	Crustacea(100)	Maxillopoda(100)	Neocalanus(100)	Neocalanus_cristatus(100)
Otu0135	559	Eukaryota(100)	Eukaryota_unclassified(100)	Eukaryota_unclassified(100)	Eukaryota_unclassified(100)	Eukaryota_unclassified(100)	Eukaryota_unclassified(100)	Eukaryota_unclassified(100)	Eukaryota_unclassified(100)
Otu0136	557	Eukaryota(100)	Eukaryota_unclassified(100)	Eukaryota_unclassified(100)	Eukaryota_unclassified(100)	Eukaryota_unclassified(100)	Eukaryota_unclassified(100)	Eukaryota_unclassified(100)	Eukaryota_unclassified(100)
Otu0137	551	Eukaryota(100)	Opisthokonta(100)	Metazoa(100)	Arthropoda(100)	Crustacea(100)	Malacostraca(100)	Malacostraca_unclassified(100)	Malacostraca_unclassified(100)
Otu0138	549	Eukaryota(100)	Eukaryota_unclassified(100)	Eukaryota_unclassified(100)	Eukaryota_unclassified(100)	Eukaryota_unclassified(100)	Eukaryota_unclassified(100)	Eukaryota_unclassified(100)	Eukaryota_unclassified(100)
Otu0139	548	Eukaryota(100)	Alveolata(100)	Alveolata_unclassified(100)	Alveolata_unclassified(100)	Alveolata_unclassified(100)	Alveolata_unclassified(100)	Alveolata_unclassified(100)	Alveolata_unclassified(100)
Otu0140	537	Eukaryota(100)	Stramenopiles(100)	Stramenopiles_unclassified(100)	Stramenopiles_unclassified(100)	Stramenopiles_unclassified(100)	Stramenopiles_unclassified(100)	Stramenopiles_unclassified(100)	Stramenopiles_unclassified(100)
Otu0141	529	Eukaryota(100)	Eukaryota_unclassified(100)	Eukaryota_unclassified(100)	Eukaryota_unclassified(100)	Eukaryota_unclassified(100)	Eukaryota_unclassified(100)	Eukaryota_unclassified(100)	Eukaryota_unclassified(100)
Otu0142	524	Eukaryota(100)	Eukaryota_unclassified(100)	Eukaryota_unclassified(100)	Eukaryota_unclassified(100)	Eukaryota_unclassified(100)	Eukaryota_unclassified(100)	Eukaryota_unclassified(100)	Eukaryota_unclassified(100)
Otu0143	523	Eukaryota(100)	Alveolata(100)	Ciliophora(100)	Cyclotrichium_like_organism(100)	Cyclotrichium_like_organism_X(100)	Cyclotrichium_like_organism_XX(100)	Cyclotrichium(100)	Cyclotrichium_sp.(100)
Otu0144	523	Eukaryota(100)	Eukaryota_unclassified(100)	Eukaryota_unclassified(100)	Eukaryota_unclassified(100)	Eukaryota_unclassified(100)	Eukaryota_unclassified(100)	Eukaryota_unclassified(100)	Eukaryota_unclassified(100)
Otu0145	522	Eukaryota(100)	Stramenopiles(100)	Sagenista(100)	MAST-6(100)	MAST-6_X(100)	MAST-6_XX(100)	MAST-6_XXX(100)	MAST-6_XXX_sp.(100)
Otu0146	521	Eukaryota(100)	Opisthokonta(100)	Metazoa(100)	Nematoda(100)	Chromadorea(100)	Chromadorea_X(100)	Strongyloides(100)	Strongyloides_unclassified(51)
Otu0147	508	Eukaryota(100)	Opisthokonta(100)	Metazoa(100)	Mollusca(100)	Gastropoda(100)	Nudibranchia(100)	Nudibranchia_unclassified(100)	Nudibranchia_unclassified(100)
Otu0148	503	Eukaryota(100)	Opisthokonta(100)	Fungi(100)	Basidiomycota(100)	Agaricomycotina(100)	Agaricomycetes(100)	Guehomyces(96)	Guehomyces_pullulans(96)
Otu0149	499	Eukaryota(100)	Stramenopiles(100)	Ochrophyta(100)	Bacillariophyta(100)	Bacillariophyta_X(100)	Radial-centric-basal-Coscinodiscophyceae(100)	Paralia(100)	Paralia_sulcata(100)
Otu0150	497	Eukaryota(100)	Eukaryota_unclassified(100)	Eukaryota_unclassified(100)	Eukaryota_unclassified(100)	Eukaryota_unclassified(100)	Eukaryota_unclassified(100)	Eukaryota_unclassified(100)	Eukaryota_unclassified(100)
Otu0151	496	Eukaryota(100)	Archaeplastida(100)	Chlorophyta(100)	Chlorophyta_unclassified(100)	Chlorophyta_unclassified(100)	Chlorophyta_unclassified(100)	Chlorophyta_unclassified(100)	Chlorophyta_unclassified(100)
Otu0152	496	Eukaryota(100)	Eukaryota_unclassified(100)	Eukaryota_unclassified(100)	Eukaryota_unclassified(100)	Eukaryota_unclassified(100)	Eukaryota_unclassified(100)	Eukaryota_unclassified(100)	Eukaryota_unclassified(100)
Otu0153	489	Eukaryota(100)	Alveolata(100)	Dinoflagellata(100)	Dinophyceae(100)	Gymnodiniales(100)	Chytriodiniaceae(100)	Dissodinium(100)	Dissodinium_pseudolunula(100)
Otu0154	469	Eukaryota(100)	Rhizaria(100)	Cercozoa(100)	Filosa-Thecofilosea(100)	Cryomonadida(100)	Cryomonadida_unclassified(100)	Cryomonadida_unclassified(100)	Cryomonadida_unclassified(100)
Otu0155	467	Eukaryota(100)	Eukaryota_unclassified(100)	Eukaryota_unclassified(100)	Eukaryota_unclassified(100)	Eukaryota_unclassified(100)	Eukaryota_unclassified(100)	Eukaryota_unclassified(100)	Eukaryota_unclassified(100)
Otu0156	466	Eukaryota(100)	Eukaryota_unclassified(100)	Eukaryota_unclassified(100)	Eukaryota_unclassified(100)	Eukaryota_unclassified(100)	Eukaryota_unclassified(100)	Eukaryota_unclassified(100)	Eukaryota_unclassified(100)
Otu0157	464	Eukaryota(100)	Eukaryota_unclassified(100)	Eukaryota_unclassified(100)	Eukaryota_unclassified(100)	Eukaryota_unclassified(100)	Eukaryota_unclassified(100)	Eukaryota_unclassified(100)	Eukaryota_unclassified(100)
Otu0158	445	Eukaryota(100)	Rhizaria(92)	Cercozoa(92)	Filosa-Thecofilosea(90)	Cryomonadida(90)	Protaspa-lineage(63)	Protaspa-lineage_unclassified(63)	Protaspa-lineage_unclassified(63)
Otu0159	443	Eukaryota(100)	Opisthokonta(100)	Metazoa(100)	Acanthocephala(100)	Acanthocephala_X(100)	Acanthocephala_XX(100)	Corynosoma(100)	Corynosoma_unclassified(100)
Otu0160	442	Eukaryota(100)	Opisthokonta(100)	Metazoa(100)	Arthropoda(100)	Chelicerata(100)	Arachnida(100)	Demodex(100)	Demodex_brevis(100)
Otu0161	437	Eukaryota(100)	Opisthokonta(100)	Fungi(100)	Basidiomycota(100)	Agaricomycotina(100)	Agaricomycetes(100)	Agaricomycetes_unclassified(100)	Agaricomycetes_unclassified(100)
Otu0162	430	Eukaryota(100)	Alveolata(100)	Alveolata_unclassified(100)	Alveolata_unclassified(100)	Alveolata_unclassified(100)	Alveolata_unclassified(100)	Alveolata_unclassified(100)	Alveolata_unclassified(100)
Otu0163	429	Eukaryota(100)	Alveolata(100)	Ciliophora(100)	Spirotrichea(100)	Spirotrichea_unclassified(100)	Spirotrichea_unclassified(100)	Spirotrichea_unclassified(100)	Spirotrichea_unclassified(100)
Otu0164	428	Eukaryota(100)	Eukaryota_unclassified(100)	Eukaryota_unclassified(100)	Eukaryota_unclassified(100)	Eukaryota_unclassified(100)	Eukaryota_unclassified(100)	Eukaryota_unclassified(100)	Eukaryota_unclassified(100)
Otu0165	424	Eukaryota(100)	Eukaryota_unclassified(100)	Eukaryota_unclassified(100)	Eukaryota_unclassified(100)	Eukaryota_unclassified(100)	Eukaryota_unclassified(100)	Eukaryota_unclassified(100)	Eukaryota_unclassified(100)
Otu0166	424	Eukaryota(100)	Alveolata(100)	Dinoflagellata(100)	Dinophyceae(100)	Suessiales(100)	Suessiaceae(100)	Protodinium(100)	Protodinium_simplex(100)
Otu0167	423	Eukaryota(100)	Rhizaria(100)	Cercozoa(100)	Filosa-Imbricatea(100)	Filosa-Imbricatea_X(100)	Novel-clade-2(100)	Novel-clade-2_X(100)	Novel-clade-2_X_sp.(100)
Otu0168	422	Eukaryota(100)	Rhizaria(97)	Cercozoa(96)	Filosa-Thecofilosea(96)	Cryomonadida(96)	Cryomonadida_unclassified(82)	Cryomonadida_unclassified(82)	Cryomonadida_unclassified(82)
Otu0169	420	Eukaryota(100)	Rhizaria(93)	Cercozoa(93)	Filosa-Thecofilosea(93)	Cryomonadida(93)	Cryomonadida_unclassified(93)	Cryomonadida_unclassified(93)	Cryomonadida_unclassified(93)
Otu0170	415	Eukaryota(100)	Alveolata(100)	Apicomplexa(100)	Apicomplexa_unclassified(100)	Apicomplexa_unclassified(100)	Apicomplexa_unclassified(100)	Apicomplexa_unclassified(100)	Apicomplexa_unclassified(100)
Otu0171	414	Eukaryota(100)	Eukaryota_unclassified(100)	Eukaryota_unclassified(100)	Eukaryota_unclassified(100)	Eukaryota_unclassified(100)	Eukaryota_unclassified(100)	Eukaryota_unclassified(100)	Eukaryota_unclassified(100)
Otu0172	411	Eukaryota(100)	Stramenopiles(96)	Stramenopiles_unclassified(77)	Stramenopiles_unclassified(77)	Stramenopiles_unclassified(77)	Stramenopiles_unclassified(77)	Stramenopiles_unclassified(77)	Stramenopiles_unclassified(77)
Otu0173	408	Eukaryota(100)	Alveolata(100)	Dinoflagellata(100)	Dinophyceae(100)	Peridiniales(100)	Protoperidiniaceae(100)	Protoperidinium(100)	Protoperidinium_monovelum(100)
Otu0174	404	Eukaryota(100)	Alveolata(100)	Ciliophora(100)	Spirotrichea(100)	Choreotrichida(100)	Strobilidiidae_G(100)	Strobilidiidae_G_X(100)	Strobilidiidae_G_X_sp.(100)
Otu0175	402	Eukaryota(100)	Eukaryota_unclassified(100)	Eukaryota_unclassified(100)	Eukaryota_unclassified(100)	Eukaryota_unclassified(100)	Eukaryota_unclassified(100)	Eukaryota_unclassified(100)	Eukaryota_unclassified(100)
Otu0176	397	Eukaryota(100)	Excavata(100)	Discoba(100)	Heterolobosea(100)	Heterolobosea_X(100)	Vahlkampfiidae(100)	Naegleria(100)	Naegleria_clarki(100)
Otu0177	385	Eukaryota(100)	Alveolata(100)	Dinoflagellata(100)	Dinophyceae(100)	Dinophyceae_unclassified(100)	Dinophyceae_unclassified(100)	Dinophyceae_unclassified(100)	Dinophyceae_unclassified(100)
Otu0178	379	Eukaryota(100)	Eukaryota_unclassified(100)	Eukaryota_unclassified(100)	Eukaryota_unclassified(100)	Eukaryota_unclassified(100)	Eukaryota_unclassified(100)	Eukaryota_unclassified(100)	Eukaryota_unclassified(100)
Otu0179	366	Eukaryota(100)	Opisthokonta(100)	Fungi(100)	Basidiomycota(100)	Agaricomycotina(100)	Agaricomycetes(100)	Sistotrema(100)	Sistotrema_brinkmannii(100)
Otu0180	364	Eukaryota(100)	Alveolata(100)	Dinoflagellata(100)	Dinophyceae(100)	Suessiales(97)	Suessiaceae(97)	Polarella(97)	Polarella_glacialis(97)
Otu0181	359	Eukaryota(100)	Eukaryota_unclassified(100)	Eukaryota_unclassified(100)	Eukaryota_unclassified(100)	Eukaryota_unclassified(100)	Eukaryota_unclassified(100)	Eukaryota_unclassified(100)	Eukaryota_unclassified(100)
Otu0182	358	Eukaryota(100)	Opisthokonta(100)	Metazoa(100)	Rotifera(100)	Rotifera_X(100)	Rotifera_XX(100)	Rotifera_XX_unclassified(100)	Rotifera_XX_unclassified(100)
Otu0183	356	Eukaryota(100)	Archaeplastida(100)	Chlorophyta(100)	Mamiellophyceae(100)	Dolichomastigales(100)	Dolichomastigaceae(99)	Dolichomastigaceae-B(99)	Dolichomastigaceae-B_sp.(99)
Otu0184	356	Eukaryota(100)	Rhizaria(100)	Cercozoa(100)	Filosa-Thecofilosea(100)	Cryomonadida(100)	Protaspa-lineage(99)	Protaspa-lineage_unclassified(99)	Protaspa-lineage_unclassified(99)
Otu0185	350	Eukaryota(100)	Alveolata(100)	Dinoflagellata(100)	Dinophyceae(100)	Dinophyceae_unclassified(100)	Dinophyceae_unclassified(100)	Dinophyceae_unclassified(100)	Dinophyceae_unclassified(100)
Otu0186	348	Eukaryota(100)	Eukaryota_unclassified(100)	Eukaryota_unclassified(100)	Eukaryota_unclassified(100)	Eukaryota_unclassified(100)	Eukaryota_unclassified(100)	Eukaryota_unclassified(100)	Eukaryota_unclassified(100)
Otu0187	340	Eukaryota(100)	Stramenopiles(100)	Ochrophyta(100)	Dictyochophyceae(100)	Dictyochophyceae_X(100)	Pedinellales(100)	Pedinellales_unclassified(100)	Pedinellales_unclassified(100)
Otu0188	337	Eukaryota(100)	Eukaryota_unclassified(100)	Eukaryota_unclassified(100)	Eukaryota_unclassified(100)	Eukaryota_unclassified(100)	Eukaryota_unclassified(100)	Eukaryota_unclassified(100)	Eukaryota_unclassified(100)
Otu0189	337	Eukaryota(100)	Eukaryota_unclassified(100)	Eukaryota_unclassified(100)	Eukaryota_unclassified(100)	Eukaryota_unclassified(100)	Eukaryota_unclassified(100)	Eukaryota_unclassified(100)	Eukaryota_unclassified(100)
Otu0190	333	Eukaryota(100)	Eukaryota_unclassified(100)	Eukaryota_unclassified(100)	Eukaryota_unclassified(100)	Eukaryota_unclassified(100)	Eukaryota_unclassified(100)	Eukaryota_unclassified(100)	Eukaryota_unclassified(100)
Otu0191	332	Eukaryota(100)	Opisthokonta(100)	Metazoa(100)	Nematoda(100)	Chromadorea(100)	Chromadorea_X(100)	Strongyloides(100)	Strongyloides_unclassified(65)
Otu0192	332	Eukaryota(100)	Eukaryota_unclassified(100)	Eukaryota_unclassified(100)	Eukaryota_unclassified(100)	Eukaryota_unclassified(100)	Eukaryota_unclassified(100)	Eukaryota_unclassified(100)	Eukaryota_unclassified(100)
Otu0193	330	Eukaryota(100)	Opisthokonta(100)	Fungi(100)	Ascomycota(100)	Pezizomycotina(100)	Dothideomycetes(100)	Dothideomycetes_unclassified(100)	Dothideomycetes_unclassified(100)
Otu0194	329	Eukaryota(100)	Eukaryota_unclassified(100)	Eukaryota_unclassified(100)	Eukaryota_unclassified(100)	Eukaryota_unclassified(100)	Eukaryota_unclassified(100)	Eukaryota_unclassified(100)	Eukaryota_unclassified(100)
Otu0195	327	Eukaryota(100)	Alveolata(100)	Dinoflagellata(100)	Dinophyceae(100)	Gymnodiniales(100)	Gymnodiniaceae(100)	Gymnodinium(100)	Gymnodinium_unclassified(100)
Otu0196	325	Eukaryota(100)	Alveolata(100)	Ciliophora(100)	Phyllopharyngea(100)	Suctoria(100)	Suctoria_unclassified(100)	Suctoria_unclassified(100)	Suctoria_unclassified(100)
Otu0197	323	Eukaryota(100)	Eukaryota_unclassified(100)	Eukaryota_unclassified(100)	Eukaryota_unclassified(100)	Eukaryota_unclassified(100)	Eukaryota_unclassified(100)	Eukaryota_unclassified(100)	Eukaryota_unclassified(100)
Otu0198	322	Eukaryota(100)	Eukaryota_unclassified(100)	Eukaryota_unclassified(100)	Eukaryota_unclassified(100)	Eukaryota_unclassified(100)	Eukaryota_unclassified(100)	Eukaryota_unclassified(100)	Eukaryota_unclassified(100)
Otu0199	321	Eukaryota(100)	Archaeplastida(100)	Chlorophyta(100)	Mamiellophyceae(94)	Dolichomastigales(94)	Dolichomastigales_unclassified(94)	Dolichomastigales_unclassified(94)	Dolichomastigales_unclassified(94)
Otu0200	317	Eukaryota(100)	Archaeplastida(100)	Archaeplastida_unclassified(100)	Archaeplastida_unclassified(100)	Archaeplastida_unclassified(100)	Archaeplastida_unclassified(100)	Archaeplastida_unclassified(100)	Archaeplastida_unclassified(100)
Otu0201	316	Eukaryota(100)	Opisthokonta(100)	Metazoa(100)	Platyhelminthes(100)	Cestoda(100)	Eucestoda(100)	Diphyllobothrium(100)	Diphyllobothrium_unclassified(100)
Otu0202	312	Eukaryota(100)	Eukaryota_unclassified(100)	Eukaryota_unclassified(100)	Eukaryota_unclassified(100)	Eukaryota_unclassified(100)	Eukaryota_unclassified(100)	Eukaryota_unclassified(100)	Eukaryota_unclassified(100)
Otu0203	307	Eukaryota(100)	Eukaryota_unclassified(100)	Eukaryota_unclassified(100)	Eukaryota_unclassified(100)	Eukaryota_unclassified(100)	Eukaryota_unclassified(100)	Eukaryota_unclassified(100)	Eukaryota_unclassified(100)
Otu0204	305	Eukaryota(100)	Alveolata(100)	Dinoflagellata(100)	Dinophyceae(100)	Peridiniales(100)	Protoperidiniaceae(100)	Protoperidinium(100)	Protoperidinium_punctulatum(100)
Otu0205	302	Eukaryota(100)	Archaeplastida(99)	Archaeplastida_unclassified(99)	Archaeplastida_unclassified(99)	Archaeplastida_unclassified(99)	Archaeplastida_unclassified(99)	Archaeplastida_unclassified(99)	Archaeplastida_unclassified(99)
Otu0206	296	Eukaryota(100)	Stramenopiles(100)	Ochrophyta(100)	Ochrophyta_unclassified(100)	Ochrophyta_unclassified(100)	Ochrophyta_unclassified(100)	Ochrophyta_unclassified(100)	Ochrophyta_unclassified(100)
Otu0207	293	Eukaryota(100)	Alveolata(100)	Dinoflagellata(100)	Dinophyceae(100)	Gymnodiniales(100)	Gymnodiniaceae(100)	Spiniferodinium(98)	Spiniferodinium_galeiforme(98)
Otu0208	292	Eukaryota(100)	Opisthokonta(100)	Metazoa(100)	Craniata(100)	Craniata_X(100)	Craniata_X_unclassified(100)	Craniata_X_unclassified(100)	Craniata_X_unclassified(100)
Otu0209	292	Eukaryota(100)	Alveolata(100)	Dinoflagellata(100)	Dinophyceae(100)	Peridiniales(100)	Amphidiniopsidaceae(68)	Islandinium(68)	Islandinium_tricingulatum(68)
Otu0210	287	Eukaryota(100)	Eukaryota_unclassified(100)	Eukaryota_unclassified(100)	Eukaryota_unclassified(100)	Eukaryota_unclassified(100)	Eukaryota_unclassified(100)	Eukaryota_unclassified(100)	Eukaryota_unclassified(100)
Otu0211	287	Eukaryota(100)	Opisthokonta(100)	Metazoa(100)	Acanthocephala(100)	Acanthocephala_X(100)	Acanthocephala_XX(100)	Acanthocephala_XX_unclassified(100)	Acanthocephala_XX_unclassified(100)
Otu0212	283	Eukaryota(100)	Alveolata(100)	Alveolata_unclassified(100)	Alveolata_unclassified(100)	Alveolata_unclassified(100)	Alveolata_unclassified(100)	Alveolata_unclassified(100)	Alveolata_unclassified(100)
Otu0213	282	Eukaryota(100)	Stramenopiles(100)	Ochrophyta(100)	Bacillariophyta(100)	Bacillariophyta_X(100)	Polar-centric-Mediophyceae(100)	Polar-centric-Mediophyceae_unclassified(100)	Polar-centric-Mediophyceae_unclassified(100)
Otu0214	281	Eukaryota(100)	Eukaryota_unclassified(100)	Eukaryota_unclassified(100)	Eukaryota_unclassified(100)	Eukaryota_unclassified(100)	Eukaryota_unclassified(100)	Eukaryota_unclassified(100)	Eukaryota_unclassified(100)
Otu0215	281	Eukaryota(100)	Opisthokonta(100)	Metazoa(100)	Metazoa_unclassified(100)	Metazoa_unclassified(100)	Metazoa_unclassified(100)	Metazoa_unclassified(100)	Metazoa_unclassified(100)
Otu0216	280	Eukaryota(100)	Eukaryota_unclassified(100)	Eukaryota_unclassified(100)	Eukaryota_unclassified(100)	Eukaryota_unclassified(100)	Eukaryota_unclassified(100)	Eukaryota_unclassified(100)	Eukaryota_unclassified(100)
Otu0217	277	Eukaryota(100)	Stramenopiles(100)	Ochrophyta(100)	Ochrophyta_unclassified(100)	Ochrophyta_unclassified(100)	Ochrophyta_unclassified(100)	Ochrophyta_unclassified(100)	Ochrophyta_unclassified(100)
Otu0218	272	Eukaryota(100)	Alveolata(100)	Dinoflagellata(100)	Dinophyceae(100)	Suessiales(100)	Suessiaceae(100)	Pelagodinium(100)	Pelagodinium_beii(100)
Otu0219	269	Eukaryota(100)	Opisthokonta(100)	Metazoa(100)	Mollusca(100)	Gastropoda(100)	Nudibranchia(100)	Nudibranchia_unclassified(100)	Nudibranchia_unclassified(100)
Otu0220	268	Eukaryota(100)	Opisthokonta(100)	Fungi(100)	Basidiomycota(100)	Agaricomycotina(100)	Agaricomycetes(100)	Agaricomycetes_unclassified(100)	Agaricomycetes_unclassified(100)
Otu0221	266	Eukaryota(100)	Opisthokonta(100)	Metazoa(100)	Acanthocephala(100)	Acanthocephala_X(100)	Acanthocephala_XX(100)	Corynosoma(96)	Corynosoma_unclassified(96)
Otu0222	265	Eukaryota(100)	Rhizaria(100)	Cercozoa(100)	Filosa-Thecofilosea(100)	Ventricleftida(100)	CCW10-lineage(100)	CCW10-lineage_X(100)	CCW10-lineage_X_sp.(100)
Otu0223	261	Eukaryota(100)	Rhizaria(100)	Cercozoa(100)	Filosa-Thecofilosea(100)	Cryomonadida(100)	Cryomonadida_unclassified(94)	Cryomonadida_unclassified(94)	Cryomonadida_unclassified(94)
Otu0224	260	Eukaryota(100)	Eukaryota_unclassified(100)	Eukaryota_unclassified(100)	Eukaryota_unclassified(100)	Eukaryota_unclassified(100)	Eukaryota_unclassified(100)	Eukaryota_unclassified(100)	Eukaryota_unclassified(100)
Otu0225	259	Eukaryota(100)	Eukaryota_unclassified(100)	Eukaryota_unclassified(100)	Eukaryota_unclassified(100)	Eukaryota_unclassified(100)	Eukaryota_unclassified(100)	Eukaryota_unclassified(100)	Eukaryota_unclassified(100)
Otu0226	253	Eukaryota(100)	Opisthokonta(100)	Metazoa(100)	Platyhelminthes(100)	Trematoda(100)	Digenea(100)	Digenea_unclassified(100)	Digenea_unclassified(100)
Otu0227	252	Eukaryota(100)	Eukaryota_unclassified(100)	Eukaryota_unclassified(100)	Eukaryota_unclassified(100)	Eukaryota_unclassified(100)	Eukaryota_unclassified(100)	Eukaryota_unclassified(100)	Eukaryota_unclassified(100)
Otu0228	252	Eukaryota(100)	Opisthokonta(100)	Metazoa(100)	Mollusca(100)	Gastropoda(100)	Nudibranchia(100)	Nudibranchia_unclassified(100)	Nudibranchia_unclassified(100)
Otu0229	247	Eukaryota(100)	Alveolata(100)	Dinoflagellata(100)	Dinophyceae(100)	Gonyaulacales(100)	Goniodomataceae(100)	Alexandrium(100)	Alexandrium_unclassified(100)
Otu0230	246	Eukaryota(100)	Rhizaria(100)	Cercozoa(100)	Filosa-Thecofilosea(100)	Cryomonadida(100)	Cryomonadida_unclassified(100)	Cryomonadida_unclassified(100)	Cryomonadida_unclassified(100)
Otu0231	237	Eukaryota(100)	Eukaryota_unclassified(100)	Eukaryota_unclassified(100)	Eukaryota_unclassified(100)	Eukaryota_unclassified(100)	Eukaryota_unclassified(100)	Eukaryota_unclassified(100)	Eukaryota_unclassified(100)
Otu0232	233	Eukaryota(100)	Eukaryota_unclassified(100)	Eukaryota_unclassified(100)	Eukaryota_unclassified(100)	Eukaryota_unclassified(100)	Eukaryota_unclassified(100)	Eukaryota_unclassified(100)	Eukaryota_unclassified(100)
Otu0233	232	Eukaryota(100)	Stramenopiles(100)	Ochrophyta(100)	Dictyochophyceae(100)	Dictyochophyceae_X(100)	Pedinellales(100)	Pedinellales_unclassified(100)	Pedinellales_unclassified(100)
Otu0234	231	Eukaryota(100)	Eukaryota_unclassified(100)	Eukaryota_unclassified(100)	Eukaryota_unclassified(100)	Eukaryota_unclassified(100)	Eukaryota_unclassified(100)	Eukaryota_unclassified(100)	Eukaryota_unclassified(100)
Otu0235	228	Eukaryota(100)	Eukaryota_unclassified(100)	Eukaryota_unclassified(100)	Eukaryota_unclassified(100)	Eukaryota_unclassified(100)	Eukaryota_unclassified(100)	Eukaryota_unclassified(100)	Eukaryota_unclassified(100)
Otu0236	228	Eukaryota(100)	Eukaryota_unclassified(100)	Eukaryota_unclassified(100)	Eukaryota_unclassified(100)	Eukaryota_unclassified(100)	Eukaryota_unclassified(100)	Eukaryota_unclassified(100)	Eukaryota_unclassified(100)
Otu0237	225	Eukaryota(100)	Stramenopiles(100)	Pseudofungi(100)	Oomycota(100)	Oomycota_X(100)	Oomycota_X_unclassified(81)	Oomycota_X_unclassified(81)	Oomycota_X_unclassified(81)
Otu0238	225	Eukaryota(100)	Eukaryota_unclassified(100)	Eukaryota_unclassified(100)	Eukaryota_unclassified(100)	Eukaryota_unclassified(100)	Eukaryota_unclassified(100)	Eukaryota_unclassified(100)	Eukaryota_unclassified(100)
Otu0239	225	Eukaryota(100)	Archaeplastida(100)	Chlorophyta(100)	Chlorophyta_unclassified(100)	Chlorophyta_unclassified(100)	Chlorophyta_unclassified(100)	Chlorophyta_unclassified(100)	Chlorophyta_unclassified(100)
Otu0240	223	Eukaryota(100)	Stramenopiles(96)	Ochrophyta(96)	Ochrophyta_unclassified(87)	Ochrophyta_unclassified(87)	Ochrophyta_unclassified(87)	Ochrophyta_unclassified(87)	Ochrophyta_unclassified(87)
Otu0241	218	Eukaryota(100)	Eukaryota_unclassified(100)	Eukaryota_unclassified(100)	Eukaryota_unclassified(100)	Eukaryota_unclassified(100)	Eukaryota_unclassified(100)	Eukaryota_unclassified(100)	Eukaryota_unclassified(100)
Otu0242	217	Eukaryota(100)	Eukaryota_unclassified(100)	Eukaryota_unclassified(100)	Eukaryota_unclassified(100)	Eukaryota_unclassified(100)	Eukaryota_unclassified(100)	Eukaryota_unclassified(100)	Eukaryota_unclassified(100)
Otu0243	216	Eukaryota(100)	Eukaryota_unclassified(100)	Eukaryota_unclassified(100)	Eukaryota_unclassified(100)	Eukaryota_unclassified(100)	Eukaryota_unclassified(100)	Eukaryota_unclassified(100)	Eukaryota_unclassified(100)
Otu0244	216	Eukaryota(100)	Opisthokonta(100)	Fungi(100)	Basidiomycota(100)	Agaricomycotina(100)	Agaricomycetes(100)	Hyphodontia(100)	Hyphodontia_sp.(100)
Otu0245	215	Eukaryota(100)	Stramenopiles(100)	Stramenopiles_unclassified(100)	Stramenopiles_unclassified(100)	Stramenopiles_unclassified(100)	Stramenopiles_unclassified(100)	Stramenopiles_unclassified(100)	Stramenopiles_unclassified(100)
Otu0246	213	Eukaryota(100)	Eukaryota_unclassified(100)	Eukaryota_unclassified(100)	Eukaryota_unclassified(100)	Eukaryota_unclassified(100)	Eukaryota_unclassified(100)	Eukaryota_unclassified(100)	Eukaryota_unclassified(100)
Otu0247	210	Eukaryota(100)	Alveolata(100)	Ciliophora(100)	Spirotrichea(100)	Strombidiida(100)	Strombidiidae_K(100)	Strombidium_K(100)	Strombidium_K_unclassified(100)
Otu0248	208	Eukaryota(100)	Eukaryota_unclassified(100)	Eukaryota_unclassified(100)	Eukaryota_unclassified(100)	Eukaryota_unclassified(100)	Eukaryota_unclassified(100)	Eukaryota_unclassified(100)	Eukaryota_unclassified(100)
Otu0249	208	Eukaryota(100)	Alveolata(100)	Ciliophora(100)	Spirotrichea(100)	Choreotrichida(100)	Strobilidiidae_A(100)	Rimostrombidium_A(100)	Rimostrombidium_veniliae(100)
Otu0250	207	Eukaryota(100)	Alveolata(100)	Ciliophora(100)	Spirotrichea(100)	Tintinnida(100)	TIN_11(100)	Tintinnopsis_11(86)	Tintinnopsis_11_unclassified(84)
Otu0251	201	Eukaryota(100)	Eukaryota_unclassified(100)	Eukaryota_unclassified(100)	Eukaryota_unclassified(100)	Eukaryota_unclassified(100)	Eukaryota_unclassified(100)	Eukaryota_unclassified(100)	Eukaryota_unclassified(100)
Otu0252	200	Eukaryota(100)	Eukaryota_unclassified(100)	Eukaryota_unclassified(100)	Eukaryota_unclassified(100)	Eukaryota_unclassified(100)	Eukaryota_unclassified(100)	Eukaryota_unclassified(100)	Eukaryota_unclassified(100)
Otu0253	195	Eukaryota(100)	Eukaryota_unclassified(100)	Eukaryota_unclassified(100)	Eukaryota_unclassified(100)	Eukaryota_unclassified(100)	Eukaryota_unclassified(100)	Eukaryota_unclassified(100)	Eukaryota_unclassified(100)
Otu0254	195	Eukaryota(100)	Stramenopiles(98)	Stramenopiles_unclassified(74)	Stramenopiles_unclassified(74)	Stramenopiles_unclassified(74)	Stramenopiles_unclassified(74)	Stramenopiles_unclassified(74)	Stramenopiles_unclassified(74)
Otu0255	195	Eukaryota(100)	Alveolata(100)	Dinoflagellata(100)	Dinophyceae(100)	Peridiniales(100)	Thoracosphaeraceae(100)	Stoeckeria(100)	Stoeckeria_algicida(100)
Otu0256	194	Eukaryota(100)	Opisthokonta(100)	Opisthokonta_unclassified(100)	Opisthokonta_unclassified(100)	Opisthokonta_unclassified(100)	Opisthokonta_unclassified(100)	Opisthokonta_unclassified(100)	Opisthokonta_unclassified(100)
Otu0257	193	Eukaryota(100)	Opisthokonta(100)	Metazoa(100)	Annelida(100)	Annelida_X(100)	Annelida_XX(100)	Echiurus(100)	Echiurus_echiurus(100)
Otu0258	193	Eukaryota(100)	Stramenopiles(100)	Ochrophyta(100)	Dictyochophyceae(100)	Dictyochophyceae_X(100)	Pedinellales(100)	Pedinellales_unclassified(100)	Pedinellales_unclassified(100)
Otu0259	192	Eukaryota(100)	Alveolata(100)	Dinoflagellata(100)	Dinophyceae(100)	Dinophyceae_unclassified(100)	Dinophyceae_unclassified(100)	Dinophyceae_unclassified(100)	Dinophyceae_unclassified(100)
Otu0260	192	Eukaryota(100)	Eukaryota_unclassified(100)	Eukaryota_unclassified(100)	Eukaryota_unclassified(100)	Eukaryota_unclassified(100)	Eukaryota_unclassified(100)	Eukaryota_unclassified(100)	Eukaryota_unclassified(100)
Otu0261	191	Eukaryota(100)	Opisthokonta(100)	Metazoa(100)	Echinodermata(100)	Echinodermata_X(100)	Echinodermata_XX(100)	Echinodermata_XX_unclassified(100)	Echinodermata_XX_unclassified(100)
Otu0262	190	Eukaryota(100)	Rhizaria(100)	Cercozoa(100)	Filosa-Thecofilosea(100)	Ventricleftida(100)	CCW10-lineage(100)	CCW10-lineage_X(100)	CCW10-lineage_X_sp.(100)
Otu0263	190	Eukaryota(100)	Opisthokonta(100)	Metazoa(100)	Platyhelminthes(100)	Trematoda(100)	Digenea(100)	Digenea_unclassified(100)	Digenea_unclassified(100)
Otu0264	189	Eukaryota(100)	Rhizaria(99)	Cercozoa(99)	Cercozoa_unclassified(62)	Cercozoa_unclassified(62)	Cercozoa_unclassified(62)	Cercozoa_unclassified(62)	Cercozoa_unclassified(62)
Otu0265	186	Eukaryota(100)	Stramenopiles(69)	Stramenopiles_unclassified(69)	Stramenopiles_unclassified(69)	Stramenopiles_unclassified(69)	Stramenopiles_unclassified(69)	Stramenopiles_unclassified(69)	Stramenopiles_unclassified(69)
Otu0266	186	Eukaryota(100)	Archaeplastida(100)	Streptophyta(100)	Klebsormidiophyceae(100)	Klebsormidiophyceae_X(100)	Klebsormidiophyceae_XX(100)	Klebsormidiophyceae_XX_unclassified(100)	Klebsormidiophyceae_XX_unclassified(100)
Otu0267	185	Eukaryota(100)	Eukaryota_unclassified(100)	Eukaryota_unclassified(100)	Eukaryota_unclassified(100)	Eukaryota_unclassified(100)	Eukaryota_unclassified(100)	Eukaryota_unclassified(100)	Eukaryota_unclassified(100)
Otu0268	183	Eukaryota(100)	Archaeplastida(100)	Archaeplastida_unclassified(100)	Archaeplastida_unclassified(100)	Archaeplastida_unclassified(100)	Archaeplastida_unclassified(100)	Archaeplastida_unclassified(100)	Archaeplastida_unclassified(100)
Otu0269	183	Eukaryota(100)	Opisthokonta(100)	Fungi(100)	Ascomycota(100)	Pezizomycotina(100)	Pezizomycotina_unclassified(100)	Pezizomycotina_unclassified(100)	Pezizomycotina_unclassified(100)
Otu0270	182	Eukaryota(100)	Stramenopiles(100)	Ochrophyta(100)	Bacillariophyta(100)	Bacillariophyta_X(100)	Bacillariophyta_X_unclassified(100)	Bacillariophyta_X_unclassified(100)	Bacillariophyta_X_unclassified(100)
Otu0271	181	Eukaryota(100)	Rhizaria(92)	Cercozoa(92)	Filosa-Thecofilosea(92)	Filosa-Thecofilosea_X(92)	Mataza-lineage(92)	Mataza-lineage_X(92)	Mataza-lineage_X_sp.(92)
Otu0272	176	Eukaryota(100)	Eukaryota_unclassified(100)	Eukaryota_unclassified(100)	Eukaryota_unclassified(100)	Eukaryota_unclassified(100)	Eukaryota_unclassified(100)	Eukaryota_unclassified(100)	Eukaryota_unclassified(100)
Otu0273	175	Eukaryota(100)	Eukaryota_unclassified(100)	Eukaryota_unclassified(100)	Eukaryota_unclassified(100)	Eukaryota_unclassified(100)	Eukaryota_unclassified(100)	Eukaryota_unclassified(100)	Eukaryota_unclassified(100)
Otu0274	174	Eukaryota(100)	Eukaryota_unclassified(100)	Eukaryota_unclassified(100)	Eukaryota_unclassified(100)	Eukaryota_unclassified(100)	Eukaryota_unclassified(100)	Eukaryota_unclassified(100)	Eukaryota_unclassified(100)
Otu0275	173	Eukaryota(100)	Eukaryota_unclassified(100)	Eukaryota_unclassified(100)	Eukaryota_unclassified(100)	Eukaryota_unclassified(100)	Eukaryota_unclassified(100)	Eukaryota_unclassified(100)	Eukaryota_unclassified(100)
Otu0276	172	Eukaryota(100)	Opisthokonta(100)	Fungi(100)	Basidiomycota(100)	Agaricomycotina(100)	Agaricomycetes(100)	Hyphodontia(100)	Hyphodontia_unclassified(100)
Otu0277	169	Eukaryota(100)	Stramenopiles(100)	Ochrophyta(100)	Bacillariophyta(100)	Bacillariophyta_X(100)	Polar-centric-Mediophyceae(100)	Chaetoceros(100)	Chaetoceros_didymus_2(100)
Otu0278	169	Eukaryota(100)	Archaeplastida(100)	Chlorophyta(100)	Mamiellophyceae(100)	Mamiellales(100)	Mamiellaceae(100)	Mamiellaceae_unclassified(100)	Mamiellaceae_unclassified(100)
Otu0279	168	Eukaryota(100)	Eukaryota_unclassified(100)	Eukaryota_unclassified(100)	Eukaryota_unclassified(100)	Eukaryota_unclassified(100)	Eukaryota_unclassified(100)	Eukaryota_unclassified(100)	Eukaryota_unclassified(100)
Otu0280	167	Eukaryota(100)	Stramenopiles(100)	Ochrophyta(100)	Xanthophyceae(100)	Xanthophyceae_X(100)	Xanthophyceae_XX(100)	Xanthophyceae_XX_unclassified(100)	Xanthophyceae_XX_unclassified(100)
Otu0281	167	Eukaryota(100)	Eukaryota_unclassified(100)	Eukaryota_unclassified(100)	Eukaryota_unclassified(100)	Eukaryota_unclassified(100)	Eukaryota_unclassified(100)	Eukaryota_unclassified(100)	Eukaryota_unclassified(100)
Otu0282	165	Eukaryota(100)	Eukaryota_unclassified(100)	Eukaryota_unclassified(100)	Eukaryota_unclassified(100)	Eukaryota_unclassified(100)	Eukaryota_unclassified(100)	Eukaryota_unclassified(100)	Eukaryota_unclassified(100)
Otu0283	165	Eukaryota(100)	Archaeplastida(100)	Archaeplastida_unclassified(94)	Archaeplastida_unclassified(94)	Archaeplastida_unclassified(94)	Archaeplastida_unclassified(94)	Archaeplastida_unclassified(94)	Archaeplastida_unclassified(94)
Otu0284	165	Eukaryota(100)	Opisthokonta(100)	Fungi(100)	Ascomycota(100)	Pezizomycotina(100)	Leotiomycetes(100)	Thelebolus(100)	Thelebolus_unclassified(100)
Otu0285	164	Eukaryota(100)	Eukaryota_unclassified(100)	Eukaryota_unclassified(100)	Eukaryota_unclassified(100)	Eukaryota_unclassified(100)	Eukaryota_unclassified(100)	Eukaryota_unclassified(100)	Eukaryota_unclassified(100)
Otu0286	163	Eukaryota(100)	Stramenopiles(100)	Pseudofungi(97)	Pirsonia_Clade(97)	Pirsonia_Clade_X(97)	Pirsonia_Clade_XX(97)	Pirsonia(97)	Pirsonia_unclassified(97)
Otu0287	162	Eukaryota(100)	Rhizaria(100)	Cercozoa(100)	Cercozoa_unclassified(100)	Cercozoa_unclassified(100)	Cercozoa_unclassified(100)	Cercozoa_unclassified(100)	Cercozoa_unclassified(100)
Otu0288	162	Eukaryota(100)	Eukaryota_unclassified(89)	Eukaryota_unclassified(89)	Eukaryota_unclassified(89)	Eukaryota_unclassified(89)	Eukaryota_unclassified(89)	Eukaryota_unclassified(89)	Eukaryota_unclassified(89)
Otu0289	161	Eukaryota(100)	Rhizaria(100)	Cercozoa(100)	Filosa-Thecofilosea(60)	Filosa-Thecofilosea_X(60)	Novel-Clade-4(60)	Novel-Clade-4_X(60)	Novel-Clade-4_X_sp.(60)
Otu0290	160	Eukaryota(100)	Opisthokonta(100)	Metazoa(100)	Mollusca(100)	Cephalopoda(100)	Cephalopoda_X(100)	Cephalopoda_X_unclassified(100)	Cephalopoda_X_unclassified(100)
Otu0291	160	Eukaryota(100)	Eukaryota_unclassified(100)	Eukaryota_unclassified(100)	Eukaryota_unclassified(100)	Eukaryota_unclassified(100)	Eukaryota_unclassified(100)	Eukaryota_unclassified(100)	Eukaryota_unclassified(100)
Otu0292	160	Eukaryota(100)	Opisthokonta(100)	Fungi(100)	Basidiomycota(100)	Agaricomycotina(100)	Agaricomycetes(100)	Agaricomycetes_unclassified(100)	Agaricomycetes_unclassified(100)
Otu0293	159	Eukaryota(100)	Opisthokonta(100)	Mesomycetozoa(99)	Ichthyosporea(99)	Ichthyosphonida(99)	Pseudoperkinsidae(99)	Sphaeroforma(98)	Sphaeroforma_unclassified(98)
Otu0294	158	Eukaryota(100)	Eukaryota_unclassified(100)	Eukaryota_unclassified(100)	Eukaryota_unclassified(100)	Eukaryota_unclassified(100)	Eukaryota_unclassified(100)	Eukaryota_unclassified(100)	Eukaryota_unclassified(100)
Otu0295	158	Eukaryota(100)	Eukaryota_unclassified(100)	Eukaryota_unclassified(100)	Eukaryota_unclassified(100)	Eukaryota_unclassified(100)	Eukaryota_unclassified(100)	Eukaryota_unclassified(100)	Eukaryota_unclassified(100)
Otu0296	157	Eukaryota(100)	Alveolata(100)	Dinoflagellata(100)	Dinophyceae(100)	Gymnodiniales(100)	Gymnodiniales_unclassified(100)	Gymnodiniales_unclassified(100)	Gymnodiniales_unclassified(100)
Otu0297	157	Eukaryota(100)	Stramenopiles(90)	Ochrophyta(90)	Bacillariophyta(88)	Bacillariophyta_X(88)	Bacillariophyta_X_unclassified(88)	Bacillariophyta_X_unclassified(88)	Bacillariophyta_X_unclassified(88)
Otu0298	156	Eukaryota(100)	Opisthokonta(100)	Fungi(100)	Fungi_unclassified(100)	Fungi_unclassified(100)	Fungi_unclassified(100)	Fungi_unclassified(100)	Fungi_unclassified(100)
Otu0299	156	Eukaryota(100)	Archaeplastida(96)	Archaeplastida_unclassified(96)	Archaeplastida_unclassified(96)	Archaeplastida_unclassified(96)	Archaeplastida_unclassified(96)	Archaeplastida_unclassified(96)	Archaeplastida_unclassified(96)
Otu0300	154	Eukaryota(100)	Archaeplastida(100)	Archaeplastida_unclassified(100)	Archaeplastida_unclassified(100)	Archaeplastida_unclassified(100)	Archaeplastida_unclassified(100)	Archaeplastida_unclassified(100)	Archaeplastida_unclassified(100)
Otu0301	153	Eukaryota(100)	Alveolata(100)	Dinoflagellata(100)	Dinophyceae(100)	Dinophyceae_unclassified(100)	Dinophyceae_unclassified(100)	Dinophyceae_unclassified(100)	Dinophyceae_unclassified(100)
Otu0302	153	Eukaryota(100)	Eukaryota_unclassified(100)	Eukaryota_unclassified(100)	Eukaryota_unclassified(100)	Eukaryota_unclassified(100)	Eukaryota_unclassified(100)	Eukaryota_unclassified(100)	Eukaryota_unclassified(100)
Otu0303	152	Eukaryota(100)	Alveolata(100)	Dinoflagellata(100)	Syndiniales(100)	Dino-Group-II(100)	Dino-Group-II-Clade-33(100)	Dino-Group-II-Clade-33_X(100)	Dino-Group-II-Clade-33_X_sp.(100)
Otu0304	151	Eukaryota(100)	Eukaryota_unclassified(100)	Eukaryota_unclassified(100)	Eukaryota_unclassified(100)	Eukaryota_unclassified(100)	Eukaryota_unclassified(100)	Eukaryota_unclassified(100)	Eukaryota_unclassified(100)
Otu0305	151	Eukaryota(100)	Eukaryota_unclassified(100)	Eukaryota_unclassified(100)	Eukaryota_unclassified(100)	Eukaryota_unclassified(100)	Eukaryota_unclassified(100)	Eukaryota_unclassified(100)	Eukaryota_unclassified(100)
Otu0306	151	Eukaryota(100)	Alveolata(100)	Dinoflagellata(100)	Dinophyceae(100)	Dinophyceae_unclassified(100)	Dinophyceae_unclassified(100)	Dinophyceae_unclassified(100)	Dinophyceae_unclassified(100)
Otu0307	149	Eukaryota(100)	Eukaryota_unclassified(100)	Eukaryota_unclassified(100)	Eukaryota_unclassified(100)	Eukaryota_unclassified(100)	Eukaryota_unclassified(100)	Eukaryota_unclassified(100)	Eukaryota_unclassified(100)
Otu0308	147	Eukaryota(100)	Eukaryota_unclassified(100)	Eukaryota_unclassified(100)	Eukaryota_unclassified(100)	Eukaryota_unclassified(100)	Eukaryota_unclassified(100)	Eukaryota_unclassified(100)	Eukaryota_unclassified(100)
Otu0309	147	Eukaryota(100)	Archaeplastida(100)	Chlorophyta(100)	Chlorophyta_unclassified(100)	Chlorophyta_unclassified(100)	Chlorophyta_unclassified(100)	Chlorophyta_unclassified(100)	Chlorophyta_unclassified(100)
Otu0310	146	Eukaryota(100)	Archaeplastida(98)	Archaeplastida_unclassified(98)	Archaeplastida_unclassified(98)	Archaeplastida_unclassified(98)	Archaeplastida_unclassified(98)	Archaeplastida_unclassified(98)	Archaeplastida_unclassified(98)
Otu0311	145	Eukaryota(100)	Eukaryota_unclassified(100)	Eukaryota_unclassified(100)	Eukaryota_unclassified(100)	Eukaryota_unclassified(100)	Eukaryota_unclassified(100)	Eukaryota_unclassified(100)	Eukaryota_unclassified(100)
Otu0312	145	Eukaryota(100)	Eukaryota_unclassified(100)	Eukaryota_unclassified(100)	Eukaryota_unclassified(100)	Eukaryota_unclassified(100)	Eukaryota_unclassified(100)	Eukaryota_unclassified(100)	Eukaryota_unclassified(100)
Otu0313	144	Eukaryota(100)	Alveolata(100)	Ciliophora(100)	Ciliophora_unclassified(100)	Ciliophora_unclassified(100)	Ciliophora_unclassified(100)	Ciliophora_unclassified(100)	Ciliophora_unclassified(100)
Otu0314	143	Eukaryota(100)	Opisthokonta(100)	Metazoa(100)	Metazoa_unclassified(100)	Metazoa_unclassified(100)	Metazoa_unclassified(100)	Metazoa_unclassified(100)	Metazoa_unclassified(100)
Otu0315	143	Eukaryota(100)	Opisthokonta(100)	Metazoa(100)	Arthropoda(100)	Crustacea(100)	Maxillopoda(100)	Maxillopoda_unclassified(100)	Maxillopoda_unclassified(100)
Otu0316	142	Eukaryota(100)	Archaeplastida(100)	Archaeplastida_unclassified(100)	Archaeplastida_unclassified(100)	Archaeplastida_unclassified(100)	Archaeplastida_unclassified(100)	Archaeplastida_unclassified(100)	Archaeplastida_unclassified(100)
Otu0317	142	Eukaryota(100)	Rhizaria(100)	Cercozoa(100)	Filosa-Thecofilosea(100)	Filosa-Thecofilosea_X(100)	Mataza-lineage(100)	Mataza-lineage_X(100)	Mataza-lineage_X_sp.(100)
Otu0318	140	Eukaryota(100)	Eukaryota_unclassified(100)	Eukaryota_unclassified(100)	Eukaryota_unclassified(100)	Eukaryota_unclassified(100)	Eukaryota_unclassified(100)	Eukaryota_unclassified(100)	Eukaryota_unclassified(100)
Otu0319	139	Eukaryota(100)	Opisthokonta(100)	Fungi(100)	Ascomycota(100)	Pezizomycotina(100)	Eurotiomycetes(100)	Eurotiomycetes_unclassified(100)	Eurotiomycetes_unclassified(100)
Otu0320	138	Eukaryota(100)	Opisthokonta(100)	Metazoa(100)	Rotifera(100)	Rotifera_X(100)	Rotifera_XX(100)	Rotifera_XX_unclassified(100)	Rotifera_XX_unclassified(100)
Otu0321	138	Eukaryota(100)	Eukaryota_unclassified(100)	Eukaryota_unclassified(100)	Eukaryota_unclassified(100)	Eukaryota_unclassified(100)	Eukaryota_unclassified(100)	Eukaryota_unclassified(100)	Eukaryota_unclassified(100)
Otu0322	138	Eukaryota(100)	Alveolata(100)	Ciliophora(100)	Phyllopharyngea(100)	Suctoria(100)	Suctoria_X(100)	Suctoria_XX(100)	Suctoria_XX_sp.(100)
Otu0323	137	Eukaryota(100)	Archaeplastida(100)	Archaeplastida_unclassified(100)	Archaeplastida_unclassified(100)	Archaeplastida_unclassified(100)	Archaeplastida_unclassified(100)	Archaeplastida_unclassified(100)	Archaeplastida_unclassified(100)
Otu0324	135	Eukaryota(100)	Opisthokonta(100)	Fungi(100)	Basidiomycota(100)	Agaricomycotina(100)	Agaricomycetes(100)	Agaricomycetes_unclassified(100)	Agaricomycetes_unclassified(100)
Otu0325	135	Eukaryota(100)	Opisthokonta(100)	Fungi(100)	Ascomycota(100)	Saccharomycotina(100)	Saccharomycetales(100)	Saccharomycetales_unclassified(100)	Saccharomycetales_unclassified(100)
Otu0326	135	Eukaryota(100)	Eukaryota_unclassified(100)	Eukaryota_unclassified(100)	Eukaryota_unclassified(100)	Eukaryota_unclassified(100)	Eukaryota_unclassified(100)	Eukaryota_unclassified(100)	Eukaryota_unclassified(100)
Otu0327	134	Eukaryota(100)	Archaeplastida(100)	Archaeplastida_unclassified(100)	Archaeplastida_unclassified(100)	Archaeplastida_unclassified(100)	Archaeplastida_unclassified(100)	Archaeplastida_unclassified(100)	Archaeplastida_unclassified(100)
Otu0328	134	Eukaryota(100)	Opisthokonta(100)	Metazoa(100)	Mollusca(100)	Bivalvia(100)	Protobranchia(100)	Yoldia(100)	Yoldia_unclassified(100)
Otu0329	133	Eukaryota(100)	Eukaryota_unclassified(100)	Eukaryota_unclassified(100)	Eukaryota_unclassified(100)	Eukaryota_unclassified(100)	Eukaryota_unclassified(100)	Eukaryota_unclassified(100)	Eukaryota_unclassified(100)
Otu0330	133	Eukaryota(100)	Eukaryota_unclassified(100)	Eukaryota_unclassified(100)	Eukaryota_unclassified(100)	Eukaryota_unclassified(100)	Eukaryota_unclassified(100)	Eukaryota_unclassified(100)	Eukaryota_unclassified(100)
Otu0331	132	Eukaryota(100)	Eukaryota_unclassified(100)	Eukaryota_unclassified(100)	Eukaryota_unclassified(100)	Eukaryota_unclassified(100)	Eukaryota_unclassified(100)	Eukaryota_unclassified(100)	Eukaryota_unclassified(100)
Otu0332	131	Eukaryota(100)	Excavata(100)	Discoba(100)	Euglenozoa(100)	Euglenida(100)	Eutreptiales(100)	Eutreptiella(100)	Eutreptiella_pomquetensis(97)
Otu0333	129	Eukaryota(100)	Archaeplastida(100)	Chlorophyta(100)	Pyramimonadales(100)	Pyramimonadales_X(100)	Pyramimonadales_XX(100)	Pyramimonadales_XX_unclassified(100)	Pyramimonadales_XX_unclassified(100)
Otu0334	129	Eukaryota(100)	Opisthokonta(100)	Fungi(100)	Ascomycota(100)	Pezizomycotina(100)	Dothideomycetes(100)	Pleospora(100)	Pleospora_sp.(100)
Otu0335	129	Eukaryota(100)	Alveolata(100)	Alveolata_unclassified(100)	Alveolata_unclassified(100)	Alveolata_unclassified(100)	Alveolata_unclassified(100)	Alveolata_unclassified(100)	Alveolata_unclassified(100)
Otu0336	128	Eukaryota(100)	Archaeplastida(100)	Archaeplastida_unclassified(54)	Archaeplastida_unclassified(54)	Archaeplastida_unclassified(54)	Archaeplastida_unclassified(54)	Archaeplastida_unclassified(54)	Archaeplastida_unclassified(54)
Otu0337	128	Eukaryota(100)	Eukaryota_unclassified(100)	Eukaryota_unclassified(100)	Eukaryota_unclassified(100)	Eukaryota_unclassified(100)	Eukaryota_unclassified(100)	Eukaryota_unclassified(100)	Eukaryota_unclassified(100)
Otu0338	128	Eukaryota(100)	Eukaryota_unclassified(100)	Eukaryota_unclassified(100)	Eukaryota_unclassified(100)	Eukaryota_unclassified(100)	Eukaryota_unclassified(100)	Eukaryota_unclassified(100)	Eukaryota_unclassified(100)
Otu0339	127	Eukaryota(100)	Eukaryota_unclassified(100)	Eukaryota_unclassified(100)	Eukaryota_unclassified(100)	Eukaryota_unclassified(100)	Eukaryota_unclassified(100)	Eukaryota_unclassified(100)	Eukaryota_unclassified(100)
Otu0340	125	Eukaryota(100)	Opisthokonta(100)	Metazoa(100)	Mollusca(100)	Bivalvia(100)	Heteroconchia(100)	Heteroconchia_unclassified(100)	Heteroconchia_unclassified(100)
Otu0341	124	Eukaryota(100)	Eukaryota_unclassified(100)	Eukaryota_unclassified(100)	Eukaryota_unclassified(100)	Eukaryota_unclassified(100)	Eukaryota_unclassified(100)	Eukaryota_unclassified(100)	Eukaryota_unclassified(100)
Otu0342	122	Eukaryota(100)	Eukaryota_unclassified(100)	Eukaryota_unclassified(100)	Eukaryota_unclassified(100)	Eukaryota_unclassified(100)	Eukaryota_unclassified(100)	Eukaryota_unclassified(100)	Eukaryota_unclassified(100)
Otu0343	122	Eukaryota(100)	Opisthokonta(100)	Fungi(100)	Basidiomycota(100)	Agaricomycotina(100)	Agaricomycetes(100)	Agaricomycetes_unclassified(100)	Agaricomycetes_unclassified(100)
Otu0344	121	Eukaryota(100)	Archaeplastida(100)	Chlorophyta(100)	Mamiellophyceae(100)	Mamiellales(100)	Mamiellaceae(100)	Micromonas(100)	Micromonas_unclassified(100)
Otu0345	121	Eukaryota(100)	Eukaryota_unclassified(100)	Eukaryota_unclassified(100)	Eukaryota_unclassified(100)	Eukaryota_unclassified(100)	Eukaryota_unclassified(100)	Eukaryota_unclassified(100)	Eukaryota_unclassified(100)
Otu0346	121	Eukaryota(100)	Opisthokonta(100)	Metazoa(100)	Urochordata(100)	Urochordata_X(100)	Ascidiacea(100)	Ascidiacea_unclassified(96)	Ascidiacea_unclassified(96)
Otu0347	119	Eukaryota(100)	Eukaryota_unclassified(100)	Eukaryota_unclassified(100)	Eukaryota_unclassified(100)	Eukaryota_unclassified(100)	Eukaryota_unclassified(100)	Eukaryota_unclassified(100)	Eukaryota_unclassified(100)
Otu0348	118	Eukaryota(100)	Eukaryota_unclassified(100)	Eukaryota_unclassified(100)	Eukaryota_unclassified(100)	Eukaryota_unclassified(100)	Eukaryota_unclassified(100)	Eukaryota_unclassified(100)	Eukaryota_unclassified(100)
Otu0349	118	Eukaryota(100)	Eukaryota_unclassified(100)	Eukaryota_unclassified(100)	Eukaryota_unclassified(100)	Eukaryota_unclassified(100)	Eukaryota_unclassified(100)	Eukaryota_unclassified(100)	Eukaryota_unclassified(100)
Otu0350	115	Eukaryota(100)	Eukaryota_unclassified(100)	Eukaryota_unclassified(100)	Eukaryota_unclassified(100)	Eukaryota_unclassified(100)	Eukaryota_unclassified(100)	Eukaryota_unclassified(100)	Eukaryota_unclassified(100)
Otu0351	115	Eukaryota(100)	Stramenopiles(100)	Sagenista(94)	Labyrinthulomycetes(94)	Labyrinthulomycetes_unclassified(94)	Labyrinthulomycetes_unclassified(94)	Labyrinthulomycetes_unclassified(94)	Labyrinthulomycetes_unclassified(94)
Otu0352	114	Eukaryota(100)	Alveolata(100)	Apicomplexa(100)	Coccidiomorphea(100)	Eimeriida(100)	Eimeriidae(100)	Eimeriidae_unclassified(100)	Eimeriidae_unclassified(100)
Otu0353	114	Eukaryota(100)	Eukaryota_unclassified(100)	Eukaryota_unclassified(100)	Eukaryota_unclassified(100)	Eukaryota_unclassified(100)	Eukaryota_unclassified(100)	Eukaryota_unclassified(100)	Eukaryota_unclassified(100)
Otu0354	113	Eukaryota(100)	Stramenopiles(100)	Ochrophyta(100)	Chrysophyceae(100)	Chrysophyceae_X(100)	Chrysophyceae_Clade-F(100)	Chrysophyceae_Clade-F_unclassified(100)	Chrysophyceae_Clade-F_unclassified(100)
Otu0355	113	Eukaryota(100)	Opisthokonta(100)	Metazoa(100)	Acanthocephala(100)	Acanthocephala_X(100)	Acanthocephala_XX(100)	Corynosoma(92)	Corynosoma_unclassified(92)
Otu0356	112	Eukaryota(100)	Archaeplastida(100)	Chlorophyta(100)	Prasino-Clade-V(100)	Pseudoscourfieldiales(100)	Pycnococcaceae(100)	Pseudoscourfieldia(100)	Pseudoscourfieldia_marina(100)
Otu0357	111	Eukaryota(100)	Eukaryota_unclassified(100)	Eukaryota_unclassified(100)	Eukaryota_unclassified(100)	Eukaryota_unclassified(100)	Eukaryota_unclassified(100)	Eukaryota_unclassified(100)	Eukaryota_unclassified(100)
Otu0358	110	Eukaryota(100)	Eukaryota_unclassified(100)	Eukaryota_unclassified(100)	Eukaryota_unclassified(100)	Eukaryota_unclassified(100)	Eukaryota_unclassified(100)	Eukaryota_unclassified(100)	Eukaryota_unclassified(100)
Otu0359	109	Eukaryota(100)	Opisthokonta(100)	Metazoa(100)	Nematoda(100)	Chromadorea(100)	Chromadorea_X(100)	Strongyloides(100)	Strongyloides_procyonis(100)
Otu0360	109	Eukaryota(100)	Opisthokonta(100)	Fungi(100)	Mucoromycota(100)	Mucoromycotina(100)	Mucoromycotina_X(100)	Mucoromycotina_X_unclassified(100)	Mucoromycotina_X_unclassified(100)
Otu0361	108	Eukaryota(100)	Archaeplastida(100)	Archaeplastida_unclassified(100)	Archaeplastida_unclassified(100)	Archaeplastida_unclassified(100)	Archaeplastida_unclassified(100)	Archaeplastida_unclassified(100)	Archaeplastida_unclassified(100)
Otu0362	108	Eukaryota(100)	Eukaryota_unclassified(100)	Eukaryota_unclassified(100)	Eukaryota_unclassified(100)	Eukaryota_unclassified(100)	Eukaryota_unclassified(100)	Eukaryota_unclassified(100)	Eukaryota_unclassified(100)
Otu0363	108	Eukaryota(100)	Eukaryota_unclassified(100)	Eukaryota_unclassified(100)	Eukaryota_unclassified(100)	Eukaryota_unclassified(100)	Eukaryota_unclassified(100)	Eukaryota_unclassified(100)	Eukaryota_unclassified(100)
Otu0364	107	Eukaryota(100)	Eukaryota_unclassified(100)	Eukaryota_unclassified(100)	Eukaryota_unclassified(100)	Eukaryota_unclassified(100)	Eukaryota_unclassified(100)	Eukaryota_unclassified(100)	Eukaryota_unclassified(100)
Otu0365	107	Eukaryota(100)	Opisthokonta(100)	Fungi(100)	Basidiomycota(100)	Agaricomycotina(100)	Agaricomycetes(100)	Agaricomycetes_unclassified(100)	Agaricomycetes_unclassified(100)
Otu0366	105	Eukaryota(100)	Eukaryota_unclassified(100)	Eukaryota_unclassified(100)	Eukaryota_unclassified(100)	Eukaryota_unclassified(100)	Eukaryota_unclassified(100)	Eukaryota_unclassified(100)	Eukaryota_unclassified(100)
Otu0367	105	Eukaryota(100)	Eukaryota_unclassified(100)	Eukaryota_unclassified(100)	Eukaryota_unclassified(100)	Eukaryota_unclassified(100)	Eukaryota_unclassified(100)	Eukaryota_unclassified(100)	Eukaryota_unclassified(100)
Otu0368	104	Eukaryota(100)	Opisthokonta(100)	Fungi(100)	Basidiomycota(100)	Agaricomycotina(100)	Agaricomycetes(100)	Rhizoctonia(63)	Rhizoctonia_solani(63)
Otu0369	104	Eukaryota(100)	Stramenopiles(100)	Stramenopiles_unclassified(100)	Stramenopiles_unclassified(100)	Stramenopiles_unclassified(100)	Stramenopiles_unclassified(100)	Stramenopiles_unclassified(100)	Stramenopiles_unclassified(100)
Otu0370	103	Eukaryota(100)	Eukaryota_unclassified(100)	Eukaryota_unclassified(100)	Eukaryota_unclassified(100)	Eukaryota_unclassified(100)	Eukaryota_unclassified(100)	Eukaryota_unclassified(100)	Eukaryota_unclassified(100)
Otu0371	102	Eukaryota(100)	Opisthokonta(100)	Opisthokonta_unclassified(100)	Opisthokonta_unclassified(100)	Opisthokonta_unclassified(100)	Opisthokonta_unclassified(100)	Opisthokonta_unclassified(100)	Opisthokonta_unclassified(100)
Otu0372	101	Eukaryota(100)	Eukaryota_unclassified(100)	Eukaryota_unclassified(100)	Eukaryota_unclassified(100)	Eukaryota_unclassified(100)	Eukaryota_unclassified(100)	Eukaryota_unclassified(100)	Eukaryota_unclassified(100)
Otu0373	100	Eukaryota(100)	Eukaryota_unclassified(100)	Eukaryota_unclassified(100)	Eukaryota_unclassified(100)	Eukaryota_unclassified(100)	Eukaryota_unclassified(100)	Eukaryota_unclassified(100)	Eukaryota_unclassified(100)
Otu0374	100	Eukaryota(100)	Rhizaria(97)	Rhizaria_unclassified(97)	Rhizaria_unclassified(97)	Rhizaria_unclassified(97)	Rhizaria_unclassified(97)	Rhizaria_unclassified(97)	Rhizaria_unclassified(97)
Otu0375	99	Eukaryota(100)	Eukaryota_unclassified(100)	Eukaryota_unclassified(100)	Eukaryota_unclassified(100)	Eukaryota_unclassified(100)	Eukaryota_unclassified(100)	Eukaryota_unclassified(100)	Eukaryota_unclassified(100)
Otu0376	99	Eukaryota(100)	Eukaryota_unclassified(100)	Eukaryota_unclassified(100)	Eukaryota_unclassified(100)	Eukaryota_unclassified(100)	Eukaryota_unclassified(100)	Eukaryota_unclassified(100)	Eukaryota_unclassified(100)
Otu0377	98	Eukaryota(100)	Eukaryota_unclassified(100)	Eukaryota_unclassified(100)	Eukaryota_unclassified(100)	Eukaryota_unclassified(100)	Eukaryota_unclassified(100)	Eukaryota_unclassified(100)	Eukaryota_unclassified(100)
Otu0378	98	Eukaryota(100)	Archaeplastida(100)	Archaeplastida_unclassified(100)	Archaeplastida_unclassified(100)	Archaeplastida_unclassified(100)	Archaeplastida_unclassified(100)	Archaeplastida_unclassified(100)	Archaeplastida_unclassified(100)
Otu0379	98	Eukaryota(100)	Eukaryota_unclassified(100)	Eukaryota_unclassified(100)	Eukaryota_unclassified(100)	Eukaryota_unclassified(100)	Eukaryota_unclassified(100)	Eukaryota_unclassified(100)	Eukaryota_unclassified(100)
Otu0380	96	Eukaryota(100)	Opisthokonta(100)	Fungi(100)	Mucoromycota(100)	Mucoromycotina(100)	Mucoromycotina_X(100)	Mucoromycotina_X_unclassified(91)	Mucoromycotina_X_unclassified(91)
Otu0381	96	Eukaryota(100)	Eukaryota_unclassified(100)	Eukaryota_unclassified(100)	Eukaryota_unclassified(100)	Eukaryota_unclassified(100)	Eukaryota_unclassified(100)	Eukaryota_unclassified(100)	Eukaryota_unclassified(100)
Otu0382	93	Eukaryota(100)	Opisthokonta(100)	Metazoa(100)	Acanthocephala(100)	Acanthocephala_X(100)	Acanthocephala_XX(100)	Acanthocephala_XX_unclassified(100)	Acanthocephala_XX_unclassified(100)
Otu0383	93	Eukaryota(100)	Eukaryota_unclassified(100)	Eukaryota_unclassified(100)	Eukaryota_unclassified(100)	Eukaryota_unclassified(100)	Eukaryota_unclassified(100)	Eukaryota_unclassified(100)	Eukaryota_unclassified(100)
Otu0384	93	Eukaryota(100)	Alveolata(100)	Dinoflagellata(100)	Dinophyceae(100)	Gonyaulacales(100)	Goniodomataceae(100)	Alexandrium(100)	Alexandrium_fundyense(74)
Otu0385	93	Eukaryota(100)	Alveolata(100)	Dinoflagellata(100)	Dinophyceae(100)	Gymnodiniales(100)	Gymnodiniaceae(100)	Paragymnodinium(100)	Paragymnodinium_shiwhaense(100)
Otu0386	93	Eukaryota(100)	Rhizaria(100)	Cercozoa(100)	Filosa-Thecofilosea(100)	Cryomonadida(100)	Cryothecomonas-lineage(100)	Cryothecomonas(100)	Cryothecomonas_unclassified(100)
Otu0387	91	Eukaryota(100)	Eukaryota_unclassified(100)	Eukaryota_unclassified(100)	Eukaryota_unclassified(100)	Eukaryota_unclassified(100)	Eukaryota_unclassified(100)	Eukaryota_unclassified(100)	Eukaryota_unclassified(100)
Otu0388	91	Eukaryota(100)	Archaeplastida(100)	Archaeplastida_unclassified(100)	Archaeplastida_unclassified(100)	Archaeplastida_unclassified(100)	Archaeplastida_unclassified(100)	Archaeplastida_unclassified(100)	Archaeplastida_unclassified(100)
Otu0389	91	Eukaryota(100)	Opisthokonta(100)	Opisthokonta_unclassified(97)	Opisthokonta_unclassified(97)	Opisthokonta_unclassified(97)	Opisthokonta_unclassified(97)	Opisthokonta_unclassified(97)	Opisthokonta_unclassified(97)
Otu0390	90	Eukaryota(100)	Opisthokonta(100)	Metazoa(100)	Nematoda(100)	Chromadorea(100)	Chromadorea_X(100)	Strongyloides(100)	Strongyloides_unclassified(100)
Otu0391	90	Eukaryota(100)	Stramenopiles(100)	Sagenista(100)	MAST-9(100)	MAST-9D(100)	MAST-9D_X(100)	MAST-9D_XX(100)	MAST-9D_XX_sp.(100)
Otu0392	90	Eukaryota(100)	Alveolata(100)	Dinoflagellata(100)	Dinophyceae(100)	Peridiniales(100)	Thoracosphaeraceae(100)	Tintinnophagus(100)	Tintinnophagus_acutus(100)
Otu0393	89	Eukaryota(100)	Eukaryota_unclassified(100)	Eukaryota_unclassified(100)	Eukaryota_unclassified(100)	Eukaryota_unclassified(100)	Eukaryota_unclassified(100)	Eukaryota_unclassified(100)	Eukaryota_unclassified(100)
Otu0394	89	Eukaryota(100)	Eukaryota_unclassified(100)	Eukaryota_unclassified(100)	Eukaryota_unclassified(100)	Eukaryota_unclassified(100)	Eukaryota_unclassified(100)	Eukaryota_unclassified(100)	Eukaryota_unclassified(100)
Otu0395	87	Eukaryota(100)	Rhizaria(98)	Cercozoa(98)	Cercozoa_unclassified(98)	Cercozoa_unclassified(98)	Cercozoa_unclassified(98)	Cercozoa_unclassified(98)	Cercozoa_unclassified(98)
Otu0396	87	Eukaryota(100)	Eukaryota_unclassified(100)	Eukaryota_unclassified(100)	Eukaryota_unclassified(100)	Eukaryota_unclassified(100)	Eukaryota_unclassified(100)	Eukaryota_unclassified(100)	Eukaryota_unclassified(100)
Otu0397	87	Eukaryota(100)	Eukaryota_unclassified(100)	Eukaryota_unclassified(100)	Eukaryota_unclassified(100)	Eukaryota_unclassified(100)	Eukaryota_unclassified(100)	Eukaryota_unclassified(100)	Eukaryota_unclassified(100)
Otu0398	86	Eukaryota(100)	Eukaryota_unclassified(100)	Eukaryota_unclassified(100)	Eukaryota_unclassified(100)	Eukaryota_unclassified(100)	Eukaryota_unclassified(100)	Eukaryota_unclassified(100)	Eukaryota_unclassified(100)
Otu0399	86	Eukaryota(100)	Stramenopiles(100)	Sagenista(100)	MAST-9(100)	MAST-9A(100)	MAST-9A_X(100)	MAST-9A_XX(100)	MAST-9A_XX_sp.(100)
Otu0400	86	Eukaryota(100)	Alveolata(100)	Apicomplexa(100)	Coccidiomorphea(100)	Eimeriida(100)	Sarcocystidae(100)	Sarcocystidae_unclassified(100)	Sarcocystidae_unclassified(100)
Otu0401	86	Eukaryota(100)	Archaeplastida(100)	Streptophyta(100)	Embryophyceae(100)	Embryophyceae_X(100)	Embryophyceae_XX(100)	Embryophyceae_XX_unclassified(100)	Embryophyceae_XX_unclassified(100)
Otu0402	85	Eukaryota(100)	Stramenopiles(100)	Opalozoa(99)	MAST-12(99)	MAST-12A(97)	MAST-12A_X(97)	MAST-12A_XX(97)	MAST-12A_XX_sp.(97)
Otu0403	84	Eukaryota(100)	Stramenopiles(100)	Ochrophyta(100)	Dictyochophyceae(100)	Dictyochophyceae_X(100)	Pedinellales(100)	Pseudopedinella(100)	Pseudopedinella_elastica(100)
Otu0404	83	Eukaryota(100)	Eukaryota_unclassified(100)	Eukaryota_unclassified(100)	Eukaryota_unclassified(100)	Eukaryota_unclassified(100)	Eukaryota_unclassified(100)	Eukaryota_unclassified(100)	Eukaryota_unclassified(100)
Otu0405	83	Eukaryota(100)	Eukaryota_unclassified(100)	Eukaryota_unclassified(100)	Eukaryota_unclassified(100)	Eukaryota_unclassified(100)	Eukaryota_unclassified(100)	Eukaryota_unclassified(100)	Eukaryota_unclassified(100)
Otu0406	82	Eukaryota(100)	Eukaryota_unclassified(100)	Eukaryota_unclassified(100)	Eukaryota_unclassified(100)	Eukaryota_unclassified(100)	Eukaryota_unclassified(100)	Eukaryota_unclassified(100)	Eukaryota_unclassified(100)
Otu0407	82	Eukaryota(100)	Alveolata(100)	Apicomplexa(99)	Gregarinomorphea(99)	Gregarines(99)	Gregarines_X(99)	Selenidium1(99)	Selenidium1_unclassified(99)
Otu0408	82	Eukaryota(100)	Eukaryota_unclassified(100)	Eukaryota_unclassified(100)	Eukaryota_unclassified(100)	Eukaryota_unclassified(100)	Eukaryota_unclassified(100)	Eukaryota_unclassified(100)	Eukaryota_unclassified(100)
Otu0409	81	Eukaryota(100)	Eukaryota_unclassified(77)	Eukaryota_unclassified(77)	Eukaryota_unclassified(77)	Eukaryota_unclassified(77)	Eukaryota_unclassified(77)	Eukaryota_unclassified(77)	Eukaryota_unclassified(77)
Otu0410	81	Eukaryota(100)	Opisthokonta(100)	Metazoa(100)	Mollusca(100)	Gastropoda(100)	Gastropoda_unclassified(100)	Gastropoda_unclassified(100)	Gastropoda_unclassified(100)
Otu0411	81	Eukaryota(100)	Eukaryota_unclassified(100)	Eukaryota_unclassified(100)	Eukaryota_unclassified(100)	Eukaryota_unclassified(100)	Eukaryota_unclassified(100)	Eukaryota_unclassified(100)	Eukaryota_unclassified(100)
Otu0412	81	Eukaryota(100)	Opisthokonta(100)	Metazoa(100)	Urochordata(100)	Urochordata_X(100)	Ascidiacea(100)	Halocynthia_ascidia(100)	Halocynthia_roretzi(100)
Otu0413	80	Eukaryota(100)	Alveolata(100)	Ciliophora(100)	Ciliophora_unclassified(100)	Ciliophora_unclassified(100)	Ciliophora_unclassified(100)	Ciliophora_unclassified(100)	Ciliophora_unclassified(100)
Otu0414	80	Eukaryota(100)	Archaeplastida(99)	Archaeplastida_unclassified(75)	Archaeplastida_unclassified(75)	Archaeplastida_unclassified(75)	Archaeplastida_unclassified(75)	Archaeplastida_unclassified(75)	Archaeplastida_unclassified(75)
Otu0415	80	Eukaryota(100)	Opisthokonta(100)	Metazoa(100)	Mollusca(100)	Gastropoda(100)	Caenogastropoda(100)	Caenogastropoda_unclassified(100)	Caenogastropoda_unclassified(100)
Otu0416	80	Eukaryota(100)	Eukaryota_unclassified(100)	Eukaryota_unclassified(100)	Eukaryota_unclassified(100)	Eukaryota_unclassified(100)	Eukaryota_unclassified(100)	Eukaryota_unclassified(100)	Eukaryota_unclassified(100)
Otu0417	80	Eukaryota(100)	Stramenopiles(100)	Ochrophyta(100)	MOCH-2(99)	MOCH-2_X(99)	MOCH-2_XX(99)	MOCH-2_XXX(99)	MOCH-2_XXX_sp.(99)
Otu0418	79	Eukaryota(100)	Opisthokonta(100)	Metazoa(100)	Mollusca(100)	Gastropoda(100)	Gastropoda_unclassified(100)	Gastropoda_unclassified(100)	Gastropoda_unclassified(100)
Otu0419	79	Eukaryota(100)	Eukaryota_unclassified(100)	Eukaryota_unclassified(100)	Eukaryota_unclassified(100)	Eukaryota_unclassified(100)	Eukaryota_unclassified(100)	Eukaryota_unclassified(100)	Eukaryota_unclassified(100)
Otu0420	79	Eukaryota(100)	Archaeplastida(99)	Chlorophyta(99)	Mamiellophyceae(99)	Mamiellophyceae_unclassified(99)	Mamiellophyceae_unclassified(99)	Mamiellophyceae_unclassified(99)	Mamiellophyceae_unclassified(99)
Otu0421	79	Eukaryota(100)	Opisthokonta(100)	Metazoa(100)	Arthropoda(100)	Crustacea(100)	Maxillopoda(100)	Neocalanus(100)	Neocalanus_cristatus(100)
Otu0422	78	Eukaryota(100)	Alveolata(100)	Dinoflagellata(100)	Dinophyceae(100)	Dinophyceae_unclassified(100)	Dinophyceae_unclassified(100)	Dinophyceae_unclassified(100)	Dinophyceae_unclassified(100)
Otu0423	78	Eukaryota(100)	Eukaryota_unclassified(100)	Eukaryota_unclassified(100)	Eukaryota_unclassified(100)	Eukaryota_unclassified(100)	Eukaryota_unclassified(100)	Eukaryota_unclassified(100)	Eukaryota_unclassified(100)
Otu0424	78	Eukaryota(100)	Alveolata(100)	Dinoflagellata(100)	Dinophyceae(100)	Gonyaulacales(100)	Goniodomataceae(100)	Alexandrium(100)	Alexandrium_fundyense(76)
Otu0425	77	Eukaryota(100)	Eukaryota_unclassified(100)	Eukaryota_unclassified(100)	Eukaryota_unclassified(100)	Eukaryota_unclassified(100)	Eukaryota_unclassified(100)	Eukaryota_unclassified(100)	Eukaryota_unclassified(100)
Otu0426	77	Eukaryota(100)	Archaeplastida(100)	Chlorophyta(100)	Pyramimonadales(99)	Pyramimonadales_X(99)	Pyramimonadales_XX(99)	Pterosperma(99)	Pterosperma_cristatum(99)
Otu0427	77	Eukaryota(100)	Eukaryota_unclassified(100)	Eukaryota_unclassified(100)	Eukaryota_unclassified(100)	Eukaryota_unclassified(100)	Eukaryota_unclassified(100)	Eukaryota_unclassified(100)	Eukaryota_unclassified(100)
Otu0428	76	Eukaryota(100)	Eukaryota_unclassified(100)	Eukaryota_unclassified(100)	Eukaryota_unclassified(100)	Eukaryota_unclassified(100)	Eukaryota_unclassified(100)	Eukaryota_unclassified(100)	Eukaryota_unclassified(100)
Otu0429	76	Eukaryota(100)	Stramenopiles(99)	Opalozoa(99)	Opalozoa_unclassified(99)	Opalozoa_unclassified(99)	Opalozoa_unclassified(99)	Opalozoa_unclassified(99)	Opalozoa_unclassified(99)
Otu0430	75	Eukaryota(100)	Stramenopiles(100)	Sagenista(100)	Labyrinthulomycetes(100)	Labyrinthulales(100)	Labyrinthulaceae(100)	Aplanochytrium(100)	Aplanochytrium_unclassified(100)
Otu0431	74	Eukaryota(100)	Eukaryota_unclassified(99)	Eukaryota_unclassified(99)	Eukaryota_unclassified(99)	Eukaryota_unclassified(99)	Eukaryota_unclassified(99)	Eukaryota_unclassified(99)	Eukaryota_unclassified(99)
Otu0432	73	Eukaryota(100)	Eukaryota_unclassified(100)	Eukaryota_unclassified(100)	Eukaryota_unclassified(100)	Eukaryota_unclassified(100)	Eukaryota_unclassified(100)	Eukaryota_unclassified(100)	Eukaryota_unclassified(100)
Otu0433	73	Eukaryota(100)	Eukaryota_unclassified(100)	Eukaryota_unclassified(100)	Eukaryota_unclassified(100)	Eukaryota_unclassified(100)	Eukaryota_unclassified(100)	Eukaryota_unclassified(100)	Eukaryota_unclassified(100)
Otu0434	72	Eukaryota(100)	Eukaryota_unclassified(100)	Eukaryota_unclassified(100)	Eukaryota_unclassified(100)	Eukaryota_unclassified(100)	Eukaryota_unclassified(100)	Eukaryota_unclassified(100)	Eukaryota_unclassified(100)
Otu0435	72	Eukaryota(100)	Alveolata(100)	Dinoflagellata(100)	Dinophyceae(100)	Gonyaulacales(100)	Goniodomataceae(100)	Alexandrium(100)	Alexandrium_unclassified(100)
Otu0436	72	Eukaryota(100)	Eukaryota_unclassified(100)	Eukaryota_unclassified(100)	Eukaryota_unclassified(100)	Eukaryota_unclassified(100)	Eukaryota_unclassified(100)	Eukaryota_unclassified(100)	Eukaryota_unclassified(100)
Otu0437	72	Eukaryota(100)	Alveolata(100)	Dinoflagellata(100)	Dinophyceae(100)	Peridiniales(100)	Thoracosphaeraceae(100)	Thoracosphaeraceae_unclassified(52)	Thoracosphaeraceae_unclassified(52)
Otu0438	72	Eukaryota(100)	Archaeplastida(99)	Archaeplastida_unclassified(99)	Archaeplastida_unclassified(99)	Archaeplastida_unclassified(99)	Archaeplastida_unclassified(99)	Archaeplastida_unclassified(99)	Archaeplastida_unclassified(99)
Otu0439	71	Eukaryota(100)	Eukaryota_unclassified(100)	Eukaryota_unclassified(100)	Eukaryota_unclassified(100)	Eukaryota_unclassified(100)	Eukaryota_unclassified(100)	Eukaryota_unclassified(100)	Eukaryota_unclassified(100)
Otu0440	70	Eukaryota(100)	Archaeplastida(100)	Streptophyta(100)	Embryophyceae(100)	Embryophyceae_X(100)	Embryophyceae_XX(100)	Embryophyceae_XX_unclassified(96)	Embryophyceae_XX_unclassified(96)
Otu0441	70	Eukaryota(100)	Eukaryota_unclassified(100)	Eukaryota_unclassified(100)	Eukaryota_unclassified(100)	Eukaryota_unclassified(100)	Eukaryota_unclassified(100)	Eukaryota_unclassified(100)	Eukaryota_unclassified(100)
Otu0442	70	Eukaryota(100)	Eukaryota_unclassified(100)	Eukaryota_unclassified(100)	Eukaryota_unclassified(100)	Eukaryota_unclassified(100)	Eukaryota_unclassified(100)	Eukaryota_unclassified(100)	Eukaryota_unclassified(100)
Otu0443	70	Eukaryota(100)	Opisthokonta(98)	Fungi(98)	Basidiomycota(98)	Ustilaginomycotina(98)	Exobasidiomycetes(98)	Malassezia(98)	Malassezia_unclassified(98)
Otu0444	69	Eukaryota(100)	Alveolata(100)	Dinoflagellata(100)	Dinophyceae(100)	Dinophyceae_unclassified(100)	Dinophyceae_unclassified(100)	Dinophyceae_unclassified(100)	Dinophyceae_unclassified(100)
Otu0445	69	Eukaryota(100)	Rhizaria(100)	Cercozoa(100)	Filosa-Thecofilosea(100)	Cryomonadida(100)	Protaspa-lineage(100)	Protaspa(100)	Protaspa_sp.(58)
Otu0446	69	Eukaryota(100)	Opisthokonta(100)	Metazoa(100)	Annelida(100)	Annelida_X(100)	Annelida_XX(100)	Annelida_XX_unclassified(100)	Annelida_XX_unclassified(100)
Otu0447	69	Eukaryota(100)	Rhizaria(100)	Cercozoa(100)	Chlorarachniophyceae(100)	Chlorarachnida(100)	Chlorarachnida_X(100)	Chlorarachnion(100)	Chlorarachnion_sp.(100)
Otu0448	68	Eukaryota(100)	Eukaryota_unclassified(100)	Eukaryota_unclassified(100)	Eukaryota_unclassified(100)	Eukaryota_unclassified(100)	Eukaryota_unclassified(100)	Eukaryota_unclassified(100)	Eukaryota_unclassified(100)
Otu0449	67	Eukaryota(100)	Eukaryota_unclassified(100)	Eukaryota_unclassified(100)	Eukaryota_unclassified(100)	Eukaryota_unclassified(100)	Eukaryota_unclassified(100)	Eukaryota_unclassified(100)	Eukaryota_unclassified(100)
Otu0450	67	Eukaryota(100)	Opisthokonta(100)	Fungi(100)	Ascomycota(100)	Pezizomycotina(100)	Pezizomycotina_X(100)	Alatospora(100)	Alatospora_acuminata(100)
Otu0451	66	Eukaryota(100)	Stramenopiles(79)	Ochrophyta(79)	Ochrophyta_unclassified(79)	Ochrophyta_unclassified(79)	Ochrophyta_unclassified(79)	Ochrophyta_unclassified(79)	Ochrophyta_unclassified(79)
Otu0452	66	Eukaryota(100)	Eukaryota_unclassified(100)	Eukaryota_unclassified(100)	Eukaryota_unclassified(100)	Eukaryota_unclassified(100)	Eukaryota_unclassified(100)	Eukaryota_unclassified(100)	Eukaryota_unclassified(100)
Otu0453	65	Eukaryota(100)	Eukaryota_unclassified(100)	Eukaryota_unclassified(100)	Eukaryota_unclassified(100)	Eukaryota_unclassified(100)	Eukaryota_unclassified(100)	Eukaryota_unclassified(100)	Eukaryota_unclassified(100)
Otu0454	65	Eukaryota(100)	Alveolata(100)	Ciliophora(100)	Spirotrichea(100)	Choreotrichida(100)	Strombidinopsidae(100)	Strombidinopsis(100)	Strombidinopsis_unclassified(100)
Otu0455	64	Eukaryota(100)	Stramenopiles(100)	Ochrophyta(100)	Bacillariophyta(100)	Bacillariophyta_X(100)	Polar-centric-Mediophyceae(100)	Chaetoceros(100)	Chaetoceros_contortus(96)
Otu0456	64	Eukaryota(100)	Eukaryota_unclassified(100)	Eukaryota_unclassified(100)	Eukaryota_unclassified(100)	Eukaryota_unclassified(100)	Eukaryota_unclassified(100)	Eukaryota_unclassified(100)	Eukaryota_unclassified(100)
Otu0457	64	Eukaryota(100)	Opisthokonta(100)	Metazoa(100)	Acanthocephala(100)	Acanthocephala_X(100)	Acanthocephala_XX(100)	Acanthocephala_XX_unclassified(99)	Acanthocephala_XX_unclassified(99)
Otu0458	64	Eukaryota(100)	Archaeplastida(100)	Chlorophyta(100)	Trebouxiophyceae(100)	Chlorellales(100)	Chlorellales_X(100)	Chlorellales_X_unclassified(100)	Chlorellales_X_unclassified(100)
Otu0459	64	Eukaryota(100)	Alveolata(100)	Dinoflagellata(100)	Dinophyceae(100)	Peridiniales(99)	Protoperidiniaceae(99)	Protoperidinium(99)	Protoperidinium_punctulatum(99)
Otu0460	63	Eukaryota(100)	Eukaryota_unclassified(81)	Eukaryota_unclassified(81)	Eukaryota_unclassified(81)	Eukaryota_unclassified(81)	Eukaryota_unclassified(81)	Eukaryota_unclassified(81)	Eukaryota_unclassified(81)
Otu0461	63	Eukaryota(100)	Opisthokonta(100)	Metazoa(100)	Cnidaria(100)	Cnidaria_X(100)	Anthozoa(100)	Halcampoides(100)	Halcampoides_purpurea(100)
Otu0462	62	Eukaryota(100)	Eukaryota_unclassified(100)	Eukaryota_unclassified(100)	Eukaryota_unclassified(100)	Eukaryota_unclassified(100)	Eukaryota_unclassified(100)	Eukaryota_unclassified(100)	Eukaryota_unclassified(100)
Otu0463	62	Eukaryota(100)	Alveolata(100)	Dinoflagellata(100)	Syndiniales(100)	Dino-Group-I(100)	Dino-Group-I-Clade-1(100)	Dino-Group-I-Clade-1_X(100)	Dino-Group-I-Clade-1_X_sp.(100)
Otu0464	61	Eukaryota(100)	Eukaryota_unclassified(100)	Eukaryota_unclassified(100)	Eukaryota_unclassified(100)	Eukaryota_unclassified(100)	Eukaryota_unclassified(100)	Eukaryota_unclassified(100)	Eukaryota_unclassified(100)
Otu0465	61	Eukaryota(100)	Alveolata(100)	Alveolata_unclassified(100)	Alveolata_unclassified(100)	Alveolata_unclassified(100)	Alveolata_unclassified(100)	Alveolata_unclassified(100)	Alveolata_unclassified(100)
Otu0466	61	Eukaryota(100)	Stramenopiles(100)	Ochrophyta(100)	Bolidophyceae(100)	Parmales(100)	Parmales_env_2(100)	Parmales_env_2_X(100)	Parmales_env_2_X_sp.(100)
Otu0467	60	Eukaryota(100)	Eukaryota_unclassified(100)	Eukaryota_unclassified(100)	Eukaryota_unclassified(100)	Eukaryota_unclassified(100)	Eukaryota_unclassified(100)	Eukaryota_unclassified(100)	Eukaryota_unclassified(100)
Otu0468	60	Eukaryota(100)	Eukaryota_unclassified(84)	Eukaryota_unclassified(84)	Eukaryota_unclassified(84)	Eukaryota_unclassified(84)	Eukaryota_unclassified(84)	Eukaryota_unclassified(84)	Eukaryota_unclassified(84)
Otu0469	60	Eukaryota(100)	Eukaryota_unclassified(100)	Eukaryota_unclassified(100)	Eukaryota_unclassified(100)	Eukaryota_unclassified(100)	Eukaryota_unclassified(100)	Eukaryota_unclassified(100)	Eukaryota_unclassified(100)
Otu0470	59	Eukaryota(100)	Archaeplastida(100)	Archaeplastida_unclassified(100)	Archaeplastida_unclassified(100)	Archaeplastida_unclassified(100)	Archaeplastida_unclassified(100)	Archaeplastida_unclassified(100)	Archaeplastida_unclassified(100)
Otu0471	59	Eukaryota(100)	Opisthokonta(100)	Metazoa(100)	Cnidaria(100)	Cnidaria_X(100)	Scyphozoa(100)	Chrysaora(100)	Chrysaora_unclassified(100)
Otu0472	59	Eukaryota(100)	Archaeplastida(100)	Chlorophyta(100)	Mamiellophyceae(97)	Dolichomastigales(95)	Dolichomastigales_unclassified(95)	Dolichomastigales_unclassified(95)	Dolichomastigales_unclassified(95)
Otu0473	59	Eukaryota(100)	Alveolata(100)	Dinoflagellata(100)	Dinophyceae(100)	Gonyaulacales(100)	Goniodomataceae(100)	Alexandrium(100)	Alexandrium_unclassified(82)
Otu0474	58	Eukaryota(100)	Eukaryota_unclassified(100)	Eukaryota_unclassified(100)	Eukaryota_unclassified(100)	Eukaryota_unclassified(100)	Eukaryota_unclassified(100)	Eukaryota_unclassified(100)	Eukaryota_unclassified(100)
Otu0475	58	Eukaryota(100)	Alveolata(100)	Alveolata_unclassified(100)	Alveolata_unclassified(100)	Alveolata_unclassified(100)	Alveolata_unclassified(100)	Alveolata_unclassified(100)	Alveolata_unclassified(100)
Otu0476	58	Eukaryota(100)	Rhizaria(94)	Cercozoa(94)	Filosa-Imbricatea(94)	Filosa-Imbricatea_unclassified(94)	Filosa-Imbricatea_unclassified(94)	Filosa-Imbricatea_unclassified(94)	Filosa-Imbricatea_unclassified(94)
Otu0477	58	Eukaryota(100)	Eukaryota_unclassified(100)	Eukaryota_unclassified(100)	Eukaryota_unclassified(100)	Eukaryota_unclassified(100)	Eukaryota_unclassified(100)	Eukaryota_unclassified(100)	Eukaryota_unclassified(100)
Otu0478	57	Eukaryota(100)	Opisthokonta(100)	Metazoa(100)	Platyhelminthes(100)	Trematoda(99)	Digenea(97)	Digenea_unclassified(97)	Digenea_unclassified(97)
Otu0479	57	Eukaryota(100)	Rhizaria(100)	Cercozoa(100)	Filosa-Thecofilosea(100)	Cryomonadida(100)	Protaspa-lineage(99)	Protaspa(99)	Protaspa_unclassified(99)
Otu0480	57	Eukaryota(100)	Opisthokonta(100)	Metazoa(100)	Mollusca(100)	Gastropoda(100)	Nudibranchia(95)	Nudibranchia_unclassified(95)	Nudibranchia_unclassified(95)
Otu0481	57	Eukaryota(100)	Eukaryota_unclassified(100)	Eukaryota_unclassified(100)	Eukaryota_unclassified(100)	Eukaryota_unclassified(100)	Eukaryota_unclassified(100)	Eukaryota_unclassified(100)	Eukaryota_unclassified(100)
Otu0482	57	Eukaryota(100)	Rhizaria(100)	Cercozoa(100)	Filosa-Thecofilosea(100)	Ventricleftida(100)	CCW10-lineage(100)	CCW10-lineage_X(100)	CCW10-lineage_X_sp.(100)
Otu0483	56	Eukaryota(100)	Eukaryota_unclassified(100)	Eukaryota_unclassified(100)	Eukaryota_unclassified(100)	Eukaryota_unclassified(100)	Eukaryota_unclassified(100)	Eukaryota_unclassified(100)	Eukaryota_unclassified(100)
Otu0484	56	Eukaryota(100)	Alveolata(100)	Dinoflagellata(100)	Dinophyceae(100)	Dinophyceae_unclassified(100)	Dinophyceae_unclassified(100)	Dinophyceae_unclassified(100)	Dinophyceae_unclassified(100)
Otu0485	56	Eukaryota(100)	Alveolata(100)	Dinoflagellata(100)	Dinophyceae(100)	Dinophyceae_unclassified(100)	Dinophyceae_unclassified(100)	Dinophyceae_unclassified(100)	Dinophyceae_unclassified(100)
Otu0486	56	Eukaryota(100)	Opisthokonta(100)	Metazoa(100)	Mollusca(100)	Gastropoda(100)	Nudibranchia(100)	Nudibranchia_unclassified(100)	Nudibranchia_unclassified(100)
Otu0487	56	Eukaryota(100)	Eukaryota_unclassified(100)	Eukaryota_unclassified(100)	Eukaryota_unclassified(100)	Eukaryota_unclassified(100)	Eukaryota_unclassified(100)	Eukaryota_unclassified(100)	Eukaryota_unclassified(100)
Otu0488	56	Eukaryota(100)	Opisthokonta(100)	Opisthokonta_unclassified(100)	Opisthokonta_unclassified(100)	Opisthokonta_unclassified(100)	Opisthokonta_unclassified(100)	Opisthokonta_unclassified(100)	Opisthokonta_unclassified(100)
Otu0489	56	Eukaryota(100)	Eukaryota_unclassified(100)	Eukaryota_unclassified(100)	Eukaryota_unclassified(100)	Eukaryota_unclassified(100)	Eukaryota_unclassified(100)	Eukaryota_unclassified(100)	Eukaryota_unclassified(100)
Otu0490	55	Eukaryota(100)	Opisthokonta(100)	Fungi(100)	Basidiomycota(100)	Agaricomycotina(100)	Agaricomycetes(100)	Agaricomycetes_unclassified(100)	Agaricomycetes_unclassified(100)
Otu0491	55	Eukaryota(100)	Eukaryota_unclassified(100)	Eukaryota_unclassified(100)	Eukaryota_unclassified(100)	Eukaryota_unclassified(100)	Eukaryota_unclassified(100)	Eukaryota_unclassified(100)	Eukaryota_unclassified(100)
Otu0492	54	Eukaryota(100)	Opisthokonta(100)	Metazoa(100)	Platyhelminthes(100)	Trematoda(100)	Digenea(100)	Digenea_unclassified(100)	Digenea_unclassified(100)
Otu0493	54	Eukaryota(100)	Eukaryota_unclassified(100)	Eukaryota_unclassified(100)	Eukaryota_unclassified(100)	Eukaryota_unclassified(100)	Eukaryota_unclassified(100)	Eukaryota_unclassified(100)	Eukaryota_unclassified(100)
Otu0494	54	Eukaryota(100)	Eukaryota_unclassified(100)	Eukaryota_unclassified(100)	Eukaryota_unclassified(100)	Eukaryota_unclassified(100)	Eukaryota_unclassified(100)	Eukaryota_unclassified(100)	Eukaryota_unclassified(100)
Otu0495	54	Eukaryota(100)	Archaeplastida(100)	Chlorophyta(100)	Pyramimonadales(100)	Pyramimonadales_X(100)	Pyramimonadales_XX(100)	Pyramimonadales_XX_unclassified(100)	Pyramimonadales_XX_unclassified(100)
Otu0496	53	Eukaryota(100)	Opisthokonta(100)	Metazoa(100)	Platyhelminthes(100)	Trematoda(100)	Digenea(100)	Digenea_unclassified(100)	Digenea_unclassified(100)
Otu0497	53	Eukaryota(100)	Eukaryota_unclassified(100)	Eukaryota_unclassified(100)	Eukaryota_unclassified(100)	Eukaryota_unclassified(100)	Eukaryota_unclassified(100)	Eukaryota_unclassified(100)	Eukaryota_unclassified(100)
Otu0498	52	Eukaryota(100)	Eukaryota_unclassified(100)	Eukaryota_unclassified(100)	Eukaryota_unclassified(100)	Eukaryota_unclassified(100)	Eukaryota_unclassified(100)	Eukaryota_unclassified(100)	Eukaryota_unclassified(100)
Otu0499	52	Eukaryota(100)	Eukaryota_unclassified(100)	Eukaryota_unclassified(100)	Eukaryota_unclassified(100)	Eukaryota_unclassified(100)	Eukaryota_unclassified(100)	Eukaryota_unclassified(100)	Eukaryota_unclassified(100)
Otu0500	52	Eukaryota(100)	Alveolata(100)	Ciliophora(100)	Spirotrichea(100)	Strombidiida(100)	Strombidiida_unclassified(100)	Strombidiida_unclassified(100)	Strombidiida_unclassified(100)
Otu0501	52	Eukaryota(100)	Opisthokonta(100)	Metazoa(100)	Metazoa_unclassified(100)	Metazoa_unclassified(100)	Metazoa_unclassified(100)	Metazoa_unclassified(100)	Metazoa_unclassified(100)
Otu0502	51	Eukaryota(100)	Opisthokonta(100)	Opisthokonta_unclassified(100)	Opisthokonta_unclassified(100)	Opisthokonta_unclassified(100)	Opisthokonta_unclassified(100)	Opisthokonta_unclassified(100)	Opisthokonta_unclassified(100)
Otu0503	51	Eukaryota(100)	Alveolata(100)	Dinoflagellata(100)	Dinophyceae(100)	Dinophyceae_unclassified(100)	Dinophyceae_unclassified(100)	Dinophyceae_unclassified(100)	Dinophyceae_unclassified(100)
Otu0504	51	Eukaryota(100)	Eukaryota_unclassified(100)	Eukaryota_unclassified(100)	Eukaryota_unclassified(100)	Eukaryota_unclassified(100)	Eukaryota_unclassified(100)	Eukaryota_unclassified(100)	Eukaryota_unclassified(100)
Otu0505	51	Eukaryota(100)	Alveolata(100)	Ciliophora(100)	Spirotrichea(100)	Tintinnida(100)	TIN_07(100)	Tintinnopsis_07(100)	Tintinnopsis_07_sp.(100)
Otu0506	51	Eukaryota(100)	Eukaryota_unclassified(100)	Eukaryota_unclassified(100)	Eukaryota_unclassified(100)	Eukaryota_unclassified(100)	Eukaryota_unclassified(100)	Eukaryota_unclassified(100)	Eukaryota_unclassified(100)
Otu0507	50	Eukaryota(100)	Stramenopiles(100)	Pseudofungi(100)	MAST-2(100)	MAST-2_unclassified(100)	MAST-2_unclassified(100)	MAST-2_unclassified(100)	MAST-2_unclassified(100)
Otu0508	50	Eukaryota(100)	Opisthokonta(100)	Fungi(100)	Fungi_unclassified(100)	Fungi_unclassified(100)	Fungi_unclassified(100)	Fungi_unclassified(100)	Fungi_unclassified(100)
Otu0509	49	Eukaryota(100)	Eukaryota_unclassified(100)	Eukaryota_unclassified(100)	Eukaryota_unclassified(100)	Eukaryota_unclassified(100)	Eukaryota_unclassified(100)	Eukaryota_unclassified(100)	Eukaryota_unclassified(100)
Otu0510	49	Eukaryota(100)	Eukaryota_unclassified(100)	Eukaryota_unclassified(100)	Eukaryota_unclassified(100)	Eukaryota_unclassified(100)	Eukaryota_unclassified(100)	Eukaryota_unclassified(100)	Eukaryota_unclassified(100)
Otu0511	49	Eukaryota(100)	Opisthokonta(100)	Fungi(100)	Ascomycota(100)	Pezizomycotina(100)	Dothideomycetes(100)	Dothideomycetes_unclassified(60)	Dothideomycetes_unclassified(60)
Otu0512	49	Eukaryota(100)	Eukaryota_unclassified(100)	Eukaryota_unclassified(100)	Eukaryota_unclassified(100)	Eukaryota_unclassified(100)	Eukaryota_unclassified(100)	Eukaryota_unclassified(100)	Eukaryota_unclassified(100)
Otu0513	49	Eukaryota(100)	Eukaryota_unclassified(100)	Eukaryota_unclassified(100)	Eukaryota_unclassified(100)	Eukaryota_unclassified(100)	Eukaryota_unclassified(100)	Eukaryota_unclassified(100)	Eukaryota_unclassified(100)
Otu0514	49	Eukaryota(100)	Eukaryota_unclassified(100)	Eukaryota_unclassified(100)	Eukaryota_unclassified(100)	Eukaryota_unclassified(100)	Eukaryota_unclassified(100)	Eukaryota_unclassified(100)	Eukaryota_unclassified(100)
Otu0515	49	Eukaryota(100)	Opisthokonta(100)	Metazoa(100)	Craniata(100)	Craniata_X(100)	Teleostei(100)	Teleostei_unclassified(100)	Teleostei_unclassified(100)
Otu0516	48	Eukaryota(100)	Archaeplastida(100)	Archaeplastida_unclassified(100)	Archaeplastida_unclassified(100)	Archaeplastida_unclassified(100)	Archaeplastida_unclassified(100)	Archaeplastida_unclassified(100)	Archaeplastida_unclassified(100)
Otu0517	48	Eukaryota(100)	Opisthokonta(100)	Fungi(100)	Ascomycota(100)	Pezizomycotina(100)	Pezizomycotina_unclassified(100)	Pezizomycotina_unclassified(100)	Pezizomycotina_unclassified(100)
Otu0518	48	Eukaryota(100)	Opisthokonta(100)	Metazoa(100)	Platyhelminthes(100)	Trematoda(100)	Digenea(100)	Digenea_unclassified(100)	Digenea_unclassified(100)
Otu0519	48	Eukaryota(100)	Opisthokonta(100)	Metazoa(100)	Arthropoda(100)	Crustacea(100)	Malacostraca(100)	Malacostraca_unclassified(100)	Malacostraca_unclassified(100)
Otu0520	48	Eukaryota(100)	Opisthokonta(100)	Metazoa(100)	Arthropoda(100)	Hexapoda(100)	Insecta(100)	Insecta_unclassified(100)	Insecta_unclassified(100)
Otu0521	48	Eukaryota(100)	Eukaryota_unclassified(100)	Eukaryota_unclassified(100)	Eukaryota_unclassified(100)	Eukaryota_unclassified(100)	Eukaryota_unclassified(100)	Eukaryota_unclassified(100)	Eukaryota_unclassified(100)
Otu0522	48	Eukaryota(100)	Opisthokonta(100)	Metazoa(100)	Mollusca(100)	Gastropoda(100)	Gastropoda_unclassified(94)	Gastropoda_unclassified(94)	Gastropoda_unclassified(94)
Otu0523	47	Eukaryota(100)	Eukaryota_unclassified(100)	Eukaryota_unclassified(100)	Eukaryota_unclassified(100)	Eukaryota_unclassified(100)	Eukaryota_unclassified(100)	Eukaryota_unclassified(100)	Eukaryota_unclassified(100)
Otu0524	47	Eukaryota(100)	Stramenopiles(100)	Ochrophyta(100)	Bacillariophyta(100)	Bacillariophyta_X(100)	Polar-centric-Mediophyceae(100)	Chaetoceros(100)	Chaetoceros_unclassified(100)
Otu0525	47	Eukaryota(100)	Eukaryota_unclassified(100)	Eukaryota_unclassified(100)	Eukaryota_unclassified(100)	Eukaryota_unclassified(100)	Eukaryota_unclassified(100)	Eukaryota_unclassified(100)	Eukaryota_unclassified(100)
Otu0526	47	Eukaryota(100)	Archaeplastida(96)	Archaeplastida_unclassified(96)	Archaeplastida_unclassified(96)	Archaeplastida_unclassified(96)	Archaeplastida_unclassified(96)	Archaeplastida_unclassified(96)	Archaeplastida_unclassified(96)
Otu0527	47	Eukaryota(100)	Excavata(100)	Discoba(100)	Euglenozoa(100)	Kinetoplastida(100)	Neobodonid(100)	Neobodo(100)	Neobodo_designis(100)
Otu0528	47	Eukaryota(100)	Stramenopiles(88)	Stramenopiles_unclassified(88)	Stramenopiles_unclassified(88)	Stramenopiles_unclassified(88)	Stramenopiles_unclassified(88)	Stramenopiles_unclassified(88)	Stramenopiles_unclassified(88)
Otu0529	47	Eukaryota(100)	Eukaryota_unclassified(100)	Eukaryota_unclassified(100)	Eukaryota_unclassified(100)	Eukaryota_unclassified(100)	Eukaryota_unclassified(100)	Eukaryota_unclassified(100)	Eukaryota_unclassified(100)
Otu0530	47	Eukaryota(100)	Eukaryota_unclassified(100)	Eukaryota_unclassified(100)	Eukaryota_unclassified(100)	Eukaryota_unclassified(100)	Eukaryota_unclassified(100)	Eukaryota_unclassified(100)	Eukaryota_unclassified(100)
Otu0531	47	Eukaryota(100)	Rhizaria(100)	Cercozoa(100)	Filosa-Thecofilosea(100)	Ventricleftida(100)	CCW10-lineage(100)	CCW10-lineage_X(100)	CCW10-lineage_X_sp.(100)
Otu0532	46	Eukaryota(100)	Stramenopiles(100)	Pseudofungi(100)	Oomycota(100)	Oomycota_X(100)	Oomycota_X_unclassified(100)	Oomycota_X_unclassified(100)	Oomycota_X_unclassified(100)
Otu0533	46	Eukaryota(100)	Eukaryota_unclassified(100)	Eukaryota_unclassified(100)	Eukaryota_unclassified(100)	Eukaryota_unclassified(100)	Eukaryota_unclassified(100)	Eukaryota_unclassified(100)	Eukaryota_unclassified(100)
Otu0534	46	Eukaryota(100)	Eukaryota_unclassified(100)	Eukaryota_unclassified(100)	Eukaryota_unclassified(100)	Eukaryota_unclassified(100)	Eukaryota_unclassified(100)	Eukaryota_unclassified(100)	Eukaryota_unclassified(100)
Otu0535	46	Eukaryota(100)	Eukaryota_unclassified(100)	Eukaryota_unclassified(100)	Eukaryota_unclassified(100)	Eukaryota_unclassified(100)	Eukaryota_unclassified(100)	Eukaryota_unclassified(100)	Eukaryota_unclassified(100)
Otu0536	46	Eukaryota(100)	Stramenopiles(100)	Ochrophyta(100)	Bacillariophyta(100)	Bacillariophyta_X(100)	Polar-centric-Mediophyceae(100)	Chaetoceros(100)	Chaetoceros_unclassified(100)
Otu0537	46	Eukaryota(100)	Eukaryota_unclassified(100)	Eukaryota_unclassified(100)	Eukaryota_unclassified(100)	Eukaryota_unclassified(100)	Eukaryota_unclassified(100)	Eukaryota_unclassified(100)	Eukaryota_unclassified(100)
Otu0538	45	Eukaryota(100)	Alveolata(100)	Ciliophora(100)	Spirotrichea(100)	Tintinnida(100)	TIN_03(100)	Tintinnopsis_03(100)	Tintinnopsis_lacustris(100)
Otu0539	45	Eukaryota(100)	Eukaryota_unclassified(100)	Eukaryota_unclassified(100)	Eukaryota_unclassified(100)	Eukaryota_unclassified(100)	Eukaryota_unclassified(100)	Eukaryota_unclassified(100)	Eukaryota_unclassified(100)
Otu0540	45	Eukaryota(100)	Archaeplastida(100)	Chlorophyta(80)	Mamiellophyceae(80)	Dolichomastigales(80)	Dolichomastigaceae(65)	Dolichomastigaceae-B(65)	Dolichomastigaceae-B_sp.(65)
Otu0541	45	Eukaryota(100)	Archaeplastida(94)	Archaeplastida_unclassified(94)	Archaeplastida_unclassified(94)	Archaeplastida_unclassified(94)	Archaeplastida_unclassified(94)	Archaeplastida_unclassified(94)	Archaeplastida_unclassified(94)
Otu0542	45	Eukaryota(100)	Rhizaria(100)	Cercozoa(100)	Filosa-Thecofilosea(100)	Cryomonadida(100)	Cryomonadida_unclassified(100)	Cryomonadida_unclassified(100)	Cryomonadida_unclassified(100)
Otu0543	44	Eukaryota(100)	Alveolata(100)	Dinoflagellata(100)	Dinophyceae(100)	Dinophyceae_unclassified(75)	Dinophyceae_unclassified(75)	Dinophyceae_unclassified(75)	Dinophyceae_unclassified(75)
Otu0544	44	Eukaryota(100)	Alveolata(100)	Dinoflagellata(100)	Dinophyceae(100)	Gonyaulacales(100)	Goniodomataceae(100)	Alexandrium(100)	Alexandrium_unclassified(71)
Otu0545	44	Eukaryota(100)	Opisthokonta(100)	Metazoa(100)	Platyhelminthes(100)	Trematoda(100)	Digenea(100)	Digenea_unclassified(100)	Digenea_unclassified(100)
Otu0546	44	Eukaryota(100)	Opisthokonta(100)	Metazoa(100)	Platyhelminthes(100)	Trematoda(100)	Digenea(100)	Digenea_unclassified(100)	Digenea_unclassified(100)
Otu0547	44	Eukaryota(100)	Eukaryota_unclassified(100)	Eukaryota_unclassified(100)	Eukaryota_unclassified(100)	Eukaryota_unclassified(100)	Eukaryota_unclassified(100)	Eukaryota_unclassified(100)	Eukaryota_unclassified(100)
Otu0548	44	Eukaryota(100)	Eukaryota_unclassified(100)	Eukaryota_unclassified(100)	Eukaryota_unclassified(100)	Eukaryota_unclassified(100)	Eukaryota_unclassified(100)	Eukaryota_unclassified(100)	Eukaryota_unclassified(100)
Otu0549	43	Eukaryota(100)	Eukaryota_unclassified(100)	Eukaryota_unclassified(100)	Eukaryota_unclassified(100)	Eukaryota_unclassified(100)	Eukaryota_unclassified(100)	Eukaryota_unclassified(100)	Eukaryota_unclassified(100)
Otu0550	43	Eukaryota(100)	Stramenopiles(100)	Stramenopiles_unclassified(100)	Stramenopiles_unclassified(100)	Stramenopiles_unclassified(100)	Stramenopiles_unclassified(100)	Stramenopiles_unclassified(100)	Stramenopiles_unclassified(100)
Otu0551	43	Eukaryota(100)	Eukaryota_unclassified(100)	Eukaryota_unclassified(100)	Eukaryota_unclassified(100)	Eukaryota_unclassified(100)	Eukaryota_unclassified(100)	Eukaryota_unclassified(100)	Eukaryota_unclassified(100)
Otu0552	43	Eukaryota(100)	Eukaryota_unclassified(100)	Eukaryota_unclassified(100)	Eukaryota_unclassified(100)	Eukaryota_unclassified(100)	Eukaryota_unclassified(100)	Eukaryota_unclassified(100)	Eukaryota_unclassified(100)
Otu0553	43	Eukaryota(100)	Alveolata(100)	Dinoflagellata(100)	Dinophyceae(100)	Peridiniales(100)	Thoracosphaeraceae(100)	Thoracosphaeraceae_unclassified(100)	Thoracosphaeraceae_unclassified(100)
Otu0554	42	Eukaryota(100)	Rhizaria(96)	Cercozoa(96)	Cercozoa_unclassified(91)	Cercozoa_unclassified(91)	Cercozoa_unclassified(91)	Cercozoa_unclassified(91)	Cercozoa_unclassified(91)
Otu0555	42	Eukaryota(100)	Eukaryota_unclassified(100)	Eukaryota_unclassified(100)	Eukaryota_unclassified(100)	Eukaryota_unclassified(100)	Eukaryota_unclassified(100)	Eukaryota_unclassified(100)	Eukaryota_unclassified(100)
Otu0556	42	Eukaryota(100)	Opisthokonta(100)	Fungi(100)	Mucoromycota(100)	Mucoromycotina(100)	Mucoromycotina_X(100)	Mortierella(100)	Mortierella_polycephala(100)
Otu0557	42	Eukaryota(100)	Eukaryota_unclassified(100)	Eukaryota_unclassified(100)	Eukaryota_unclassified(100)	Eukaryota_unclassified(100)	Eukaryota_unclassified(100)	Eukaryota_unclassified(100)	Eukaryota_unclassified(100)
Otu0558	42	Eukaryota(100)	Opisthokonta(100)	Metazoa(100)	Mollusca(100)	Bivalvia(100)	Heteroconchia(100)	Spisula(100)	Spisula_solidissima(100)
Otu0559	41	Eukaryota(100)	Opisthokonta(100)	Metazoa(100)	Mollusca(100)	Gastropoda(100)	Nudibranchia(100)	Nudibranchia_unclassified(100)	Nudibranchia_unclassified(100)
Otu0560	41	Eukaryota(100)	Eukaryota_unclassified(100)	Eukaryota_unclassified(100)	Eukaryota_unclassified(100)	Eukaryota_unclassified(100)	Eukaryota_unclassified(100)	Eukaryota_unclassified(100)	Eukaryota_unclassified(100)
Otu0561	41	Eukaryota(100)	Stramenopiles(100)	Ochrophyta(100)	Bacillariophyta(100)	Bacillariophyta_X(100)	Araphid-pennate(100)	Araphid-pennate_unclassified(100)	Araphid-pennate_unclassified(100)
Otu0562	41	Eukaryota(100)	Eukaryota_unclassified(100)	Eukaryota_unclassified(100)	Eukaryota_unclassified(100)	Eukaryota_unclassified(100)	Eukaryota_unclassified(100)	Eukaryota_unclassified(100)	Eukaryota_unclassified(100)
Otu0563	41	Eukaryota(100)	Archaeplastida(100)	Archaeplastida_unclassified(100)	Archaeplastida_unclassified(100)	Archaeplastida_unclassified(100)	Archaeplastida_unclassified(100)	Archaeplastida_unclassified(100)	Archaeplastida_unclassified(100)
Otu0564	41	Eukaryota(100)	Archaeplastida(100)	Streptophyta(100)	Embryophyceae(100)	Embryophyceae_X(100)	Embryophyceae_XX(100)	Embryophyceae_XX_unclassified(100)	Embryophyceae_XX_unclassified(100)
Otu0565	41	Eukaryota(100)	Rhizaria(100)	Cercozoa(100)	Filosa-Imbricatea(100)	Euglyphida(100)	Paulinellidae(100)	Paulinella(100)	Paulinella_chromatophora(100)
Otu0566	40	Eukaryota(100)	Alveolata(100)	Dinoflagellata(100)	Syndiniales(100)	Dino-Group-I(100)	Dino-Group-I-Clade-4(100)	Dino-Group-I-Clade-4_X(100)	Dino-Group-I-Clade-4_X_sp.(100)
Otu0567	40	Eukaryota(100)	Eukaryota_unclassified(100)	Eukaryota_unclassified(100)	Eukaryota_unclassified(100)	Eukaryota_unclassified(100)	Eukaryota_unclassified(100)	Eukaryota_unclassified(100)	Eukaryota_unclassified(100)
Otu0568	40	Eukaryota(100)	Stramenopiles(100)	Ochrophyta(100)	Bacillariophyta(100)	Bacillariophyta_X(100)	Raphid-pennate(100)	Fragilariopsis(100)	Fragilariopsis_unclassified(100)
Otu0569	40	Eukaryota(100)	Eukaryota_unclassified(100)	Eukaryota_unclassified(100)	Eukaryota_unclassified(100)	Eukaryota_unclassified(100)	Eukaryota_unclassified(100)	Eukaryota_unclassified(100)	Eukaryota_unclassified(100)
Otu0570	40	Eukaryota(100)	Eukaryota_unclassified(100)	Eukaryota_unclassified(100)	Eukaryota_unclassified(100)	Eukaryota_unclassified(100)	Eukaryota_unclassified(100)	Eukaryota_unclassified(100)	Eukaryota_unclassified(100)
Otu0571	40	Eukaryota(100)	Archaeplastida(100)	Archaeplastida_unclassified(100)	Archaeplastida_unclassified(100)	Archaeplastida_unclassified(100)	Archaeplastida_unclassified(100)	Archaeplastida_unclassified(100)	Archaeplastida_unclassified(100)
Otu0572	40	Eukaryota(100)	Stramenopiles(100)	Sagenista(100)	Labyrinthulomycetes(100)	Labyrinthulales(100)	Labyrinthulaceae(100)	Oblongichytrium(100)	Oblongichytrium_sp.(100)
Otu0573	39	Eukaryota(100)	Eukaryota_unclassified(100)	Eukaryota_unclassified(100)	Eukaryota_unclassified(100)	Eukaryota_unclassified(100)	Eukaryota_unclassified(100)	Eukaryota_unclassified(100)	Eukaryota_unclassified(100)
Otu0574	39	Eukaryota(100)	Archaeplastida(100)	Archaeplastida_unclassified(100)	Archaeplastida_unclassified(100)	Archaeplastida_unclassified(100)	Archaeplastida_unclassified(100)	Archaeplastida_unclassified(100)	Archaeplastida_unclassified(100)
Otu0575	39	Eukaryota(100)	Eukaryota_unclassified(100)	Eukaryota_unclassified(100)	Eukaryota_unclassified(100)	Eukaryota_unclassified(100)	Eukaryota_unclassified(100)	Eukaryota_unclassified(100)	Eukaryota_unclassified(100)
Otu0576	39	Eukaryota(100)	Opisthokonta(100)	Metazoa(100)	Platyhelminthes(100)	Trematoda(100)	Digenea(100)	Digenea_unclassified(100)	Digenea_unclassified(100)
Otu0577	39	Eukaryota(100)	Eukaryota_unclassified(100)	Eukaryota_unclassified(100)	Eukaryota_unclassified(100)	Eukaryota_unclassified(100)	Eukaryota_unclassified(100)	Eukaryota_unclassified(100)	Eukaryota_unclassified(100)
Otu0578	39	Eukaryota(100)	Eukaryota_unclassified(100)	Eukaryota_unclassified(100)	Eukaryota_unclassified(100)	Eukaryota_unclassified(100)	Eukaryota_unclassified(100)	Eukaryota_unclassified(100)	Eukaryota_unclassified(100)
Otu0579	39	Eukaryota(100)	Rhizaria(83)	Cercozoa(83)	Filosa-Thecofilosea(83)	Cryomonadida(83)	Cryomonadida_unclassified(62)	Cryomonadida_unclassified(62)	Cryomonadida_unclassified(62)
Otu0580	39	Eukaryota(100)	Eukaryota_unclassified(100)	Eukaryota_unclassified(100)	Eukaryota_unclassified(100)	Eukaryota_unclassified(100)	Eukaryota_unclassified(100)	Eukaryota_unclassified(100)	Eukaryota_unclassified(100)
Otu0581	39	Eukaryota(100)	Stramenopiles(100)	Ochrophyta(100)	Phaeophyceae(100)	Phaeophyceae_X(100)	Phaeophyceae_XX(100)	Phaeophyceae_XX_unclassified(100)	Phaeophyceae_XX_unclassified(100)
Otu0582	39	Eukaryota(100)	Eukaryota_unclassified(100)	Eukaryota_unclassified(100)	Eukaryota_unclassified(100)	Eukaryota_unclassified(100)	Eukaryota_unclassified(100)	Eukaryota_unclassified(100)	Eukaryota_unclassified(100)
Otu0583	38	Eukaryota(100)	Eukaryota_unclassified(100)	Eukaryota_unclassified(100)	Eukaryota_unclassified(100)	Eukaryota_unclassified(100)	Eukaryota_unclassified(100)	Eukaryota_unclassified(100)	Eukaryota_unclassified(100)
Otu0584	38	Eukaryota(100)	Rhizaria(100)	Cercozoa(100)	Filosa-Imbricatea(100)	Marimonadida(100)	Marimonadida_X(100)	Pseudopirsonia(100)	Pseudopirsonia_sp.(100)
Otu0585	38	Eukaryota(100)	Eukaryota_unclassified(100)	Eukaryota_unclassified(100)	Eukaryota_unclassified(100)	Eukaryota_unclassified(100)	Eukaryota_unclassified(100)	Eukaryota_unclassified(100)	Eukaryota_unclassified(100)
Otu0586	38	Eukaryota(100)	Rhizaria(100)	Cercozoa(100)	Filosa-Thecofilosea(100)	Cryomonadida(100)	Cryothecomonas-lineage(100)	Cryothecomonas(100)	Cryothecomonas_unclassified(100)
Otu0587	38	Eukaryota(100)	Eukaryota_unclassified(100)	Eukaryota_unclassified(100)	Eukaryota_unclassified(100)	Eukaryota_unclassified(100)	Eukaryota_unclassified(100)	Eukaryota_unclassified(100)	Eukaryota_unclassified(100)
Otu0588	38	Eukaryota(100)	Alveolata(100)	Ciliophora(100)	Ciliophora_unclassified(100)	Ciliophora_unclassified(100)	Ciliophora_unclassified(100)	Ciliophora_unclassified(100)	Ciliophora_unclassified(100)
Otu0589	37	Eukaryota(100)	Eukaryota_unclassified(100)	Eukaryota_unclassified(100)	Eukaryota_unclassified(100)	Eukaryota_unclassified(100)	Eukaryota_unclassified(100)	Eukaryota_unclassified(100)	Eukaryota_unclassified(100)
Otu0590	37	Eukaryota(100)	Rhizaria(100)	Cercozoa(100)	Filosa-Thecofilosea(100)	Cryomonadida(100)	Cryomonadida_unclassified(100)	Cryomonadida_unclassified(100)	Cryomonadida_unclassified(100)
Otu0591	37	Eukaryota(100)	Stramenopiles(100)	Ochrophyta(100)	Phaeophyceae(100)	Phaeophyceae_X(100)	Phaeophyceae_XX(100)	Leathesia(95)	Leathesia_difformis(95)
Otu0592	37	Eukaryota(100)	Alveolata(100)	Ciliophora(100)	Colpodea(100)	Colpodea_X(100)	Colpodida(100)	Colpodida_unclassified(100)	Colpodida_unclassified(100)
Otu0593	36	Eukaryota(100)	Opisthokonta(100)	Fungi(100)	Basidiomycota(100)	Ustilaginomycotina(100)	Ustilaginomycetes(100)	Ustilago(100)	Ustilago_maydis(89)
Otu0594	36	Eukaryota(100)	Alveolata(100)	Dinoflagellata(100)	Dinophyceae(100)	Gonyaulacales(100)	Goniodomataceae(100)	Alexandrium(100)	Alexandrium_unclassified(100)
Otu0595	36	Eukaryota(100)	Stramenopiles(100)	Ochrophyta(100)	Bacillariophyta(100)	Bacillariophyta_X(100)	Polar-centric-Mediophyceae(100)	Porosira(100)	Porosira_glacialis(100)
Otu0596	36	Eukaryota(100)	Opisthokonta(100)	Fungi(100)	Basidiomycota(100)	Pucciniomycotina(100)	Pucciniomycetes(100)	Gymnosporangium(100)	Gymnosporangium_libocedri(100)
Otu0597	36	Eukaryota(100)	Archaeplastida(100)	Streptophyta(100)	Embryophyceae(100)	Embryophyceae_X(100)	Embryophyceae_XX(100)	Embryophyceae_XX_unclassified(100)	Embryophyceae_XX_unclassified(100)
Otu0598	36	Eukaryota(100)	Alveolata(64)	Alveolata_unclassified(64)	Alveolata_unclassified(64)	Alveolata_unclassified(64)	Alveolata_unclassified(64)	Alveolata_unclassified(64)	Alveolata_unclassified(64)
Otu0599	35	Eukaryota(100)	Alveolata(100)	Ciliophora(100)	Ciliophora_unclassified(100)	Ciliophora_unclassified(100)	Ciliophora_unclassified(100)	Ciliophora_unclassified(100)	Ciliophora_unclassified(100)
Otu0600	35	Eukaryota(100)	Alveolata(100)	Alveolata_unclassified(100)	Alveolata_unclassified(100)	Alveolata_unclassified(100)	Alveolata_unclassified(100)	Alveolata_unclassified(100)	Alveolata_unclassified(100)
Otu0601	35	Eukaryota(100)	Opisthokonta(100)	Metazoa(100)	Platyhelminthes(100)	Trematoda(100)	Digenea(100)	Digenea_unclassified(100)	Digenea_unclassified(100)
Otu0602	35	Eukaryota(100)	Alveolata(100)	Alveolata_unclassified(100)	Alveolata_unclassified(100)	Alveolata_unclassified(100)	Alveolata_unclassified(100)	Alveolata_unclassified(100)	Alveolata_unclassified(100)
Otu0603	35	Eukaryota(100)	Alveolata(100)	Dinoflagellata(100)	Dinophyceae(100)	Gonyaulacales(100)	Goniodomataceae(100)	Alexandrium(100)	Alexandrium_unclassified(98)
Otu0604	35	Eukaryota(100)	Alveolata(100)	Dinoflagellata(100)	Dinophyceae(100)	Peridiniales(100)	Protoperidiniaceae(100)	Protoperidinium(100)	Protoperidinium_punctulatum(100)
Otu0605	34	Eukaryota(100)	Opisthokonta(98)	Metazoa(98)	Nematoda(98)	Chromadorea(98)	Chromadorea_X(98)	Strongyloides(98)	Strongyloides_procyonis(98)
Otu0606	34	Eukaryota(100)	Eukaryota_unclassified(100)	Eukaryota_unclassified(100)	Eukaryota_unclassified(100)	Eukaryota_unclassified(100)	Eukaryota_unclassified(100)	Eukaryota_unclassified(100)	Eukaryota_unclassified(100)
Otu0607	34	Eukaryota(100)	Stramenopiles(100)	Stramenopiles_unclassified(100)	Stramenopiles_unclassified(100)	Stramenopiles_unclassified(100)	Stramenopiles_unclassified(100)	Stramenopiles_unclassified(100)	Stramenopiles_unclassified(100)
Otu0608	34	Eukaryota(100)	Opisthokonta(100)	Metazoa(100)	Platyhelminthes(100)	Trematoda(100)	Digenea(100)	Digenea_unclassified(100)	Digenea_unclassified(100)
Otu0609	34	Eukaryota(100)	Hacrobia(98)	Haptophyta(98)	Haptophyta_unclassified(98)	Haptophyta_unclassified(98)	Haptophyta_unclassified(98)	Haptophyta_unclassified(98)	Haptophyta_unclassified(98)
Otu0610	34	Eukaryota(100)	Rhizaria(100)	Cercozoa(100)	Filosa-Thecofilosea(100)	Cryomonadida(100)	Protaspa-lineage(100)	Protaspa(100)	Protaspa_longipes(95)
Otu0611	34	Eukaryota(100)	Archaeplastida(98)	Archaeplastida_unclassified(65)	Archaeplastida_unclassified(65)	Archaeplastida_unclassified(65)	Archaeplastida_unclassified(65)	Archaeplastida_unclassified(65)	Archaeplastida_unclassified(65)
Otu0612	34	Eukaryota(100)	Eukaryota_unclassified(100)	Eukaryota_unclassified(100)	Eukaryota_unclassified(100)	Eukaryota_unclassified(100)	Eukaryota_unclassified(100)	Eukaryota_unclassified(100)	Eukaryota_unclassified(100)
Otu0613	34	Eukaryota(100)	Eukaryota_unclassified(100)	Eukaryota_unclassified(100)	Eukaryota_unclassified(100)	Eukaryota_unclassified(100)	Eukaryota_unclassified(100)	Eukaryota_unclassified(100)	Eukaryota_unclassified(100)
Otu0614	34	Eukaryota(100)	Opisthokonta(100)	Metazoa(100)	Mollusca(100)	Gastropoda(100)	Nudibranchia(100)	Nudibranchia_unclassified(100)	Nudibranchia_unclassified(100)
Otu0615	34	Eukaryota(100)	Eukaryota_unclassified(100)	Eukaryota_unclassified(100)	Eukaryota_unclassified(100)	Eukaryota_unclassified(100)	Eukaryota_unclassified(100)	Eukaryota_unclassified(100)	Eukaryota_unclassified(100)
Otu0616	34	Eukaryota(100)	Eukaryota_unclassified(100)	Eukaryota_unclassified(100)	Eukaryota_unclassified(100)	Eukaryota_unclassified(100)	Eukaryota_unclassified(100)	Eukaryota_unclassified(100)	Eukaryota_unclassified(100)
Otu0617	33	Eukaryota(100)	Eukaryota_unclassified(100)	Eukaryota_unclassified(100)	Eukaryota_unclassified(100)	Eukaryota_unclassified(100)	Eukaryota_unclassified(100)	Eukaryota_unclassified(100)	Eukaryota_unclassified(100)
Otu0618	33	Eukaryota(100)	Opisthokonta(100)	Metazoa(100)	Platyhelminthes(100)	Trematoda(100)	Digenea(100)	Digenea_unclassified(100)	Digenea_unclassified(100)
Otu0619	33	Eukaryota(100)	Archaeplastida(100)	Chlorophyta(100)	Pyramimonadales(100)	Pyramimonadales_X(100)	Pyramimonadales_XX(100)	Cymbomonas(55)	Cymbomonas_tetramitiformis(55)
Otu0620	33	Eukaryota(100)	Eukaryota_unclassified(100)	Eukaryota_unclassified(100)	Eukaryota_unclassified(100)	Eukaryota_unclassified(100)	Eukaryota_unclassified(100)	Eukaryota_unclassified(100)	Eukaryota_unclassified(100)
Otu0621	33	Eukaryota(100)	Eukaryota_unclassified(100)	Eukaryota_unclassified(100)	Eukaryota_unclassified(100)	Eukaryota_unclassified(100)	Eukaryota_unclassified(100)	Eukaryota_unclassified(100)	Eukaryota_unclassified(100)
Otu0622	33	Eukaryota(100)	Stramenopiles(100)	Opalozoa(100)	MAST-12(97)	MAST-12E(97)	MAST-12E_X(97)	MAST-12E_XX(97)	MAST-12E_XX_sp.(97)
Otu0623	33	Eukaryota(100)	Alveolata(100)	Ciliophora(100)	Spirotrichea(100)	Spirotrichea_unclassified(79)	Spirotrichea_unclassified(79)	Spirotrichea_unclassified(79)	Spirotrichea_unclassified(79)
Otu0624	33	Eukaryota(100)	Alveolata(100)	Dinoflagellata(100)	Dinophyceae(100)	Gonyaulacales(100)	Goniodomataceae(100)	Alexandrium(100)	Alexandrium_unclassified(100)
Otu0625	32	Eukaryota(100)	Alveolata(100)	Dinoflagellata(100)	Dinophyceae(100)	Gonyaulacales(100)	Goniodomataceae(100)	Alexandrium(100)	Alexandrium_unclassified(54)
Otu0626	32	Eukaryota(100)	Archaeplastida(97)	Archaeplastida_unclassified(97)	Archaeplastida_unclassified(97)	Archaeplastida_unclassified(97)	Archaeplastida_unclassified(97)	Archaeplastida_unclassified(97)	Archaeplastida_unclassified(97)
Otu0627	32	Eukaryota(100)	Rhizaria(97)	Cercozoa(97)	Filosa-Thecofilosea(97)	Cryomonadida(97)	Protaspa-lineage(97)	Protaspa(97)	Protaspa_unclassified(97)
Otu0628	32	Eukaryota(100)	Opisthokonta(100)	Opisthokonta_unclassified(100)	Opisthokonta_unclassified(100)	Opisthokonta_unclassified(100)	Opisthokonta_unclassified(100)	Opisthokonta_unclassified(100)	Opisthokonta_unclassified(100)
Otu0629	32	Eukaryota(100)	Stramenopiles(100)	Pseudofungi(100)	Oomycota(100)	Oomycota_X(100)	Oomycota_X_unclassified(88)	Oomycota_X_unclassified(88)	Oomycota_X_unclassified(88)
Otu0630	32	Eukaryota(100)	Opisthokonta(97)	Opisthokonta_unclassified(97)	Opisthokonta_unclassified(97)	Opisthokonta_unclassified(97)	Opisthokonta_unclassified(97)	Opisthokonta_unclassified(97)	Opisthokonta_unclassified(97)
Otu0631	32	Eukaryota(100)	Eukaryota_unclassified(100)	Eukaryota_unclassified(100)	Eukaryota_unclassified(100)	Eukaryota_unclassified(100)	Eukaryota_unclassified(100)	Eukaryota_unclassified(100)	Eukaryota_unclassified(100)
Otu0632	32	Eukaryota(100)	Alveolata(100)	Apicomplexa(100)	Coccidiomorphea(100)	Eimeriida(100)	Eimeriidae(100)	Eimeriidae_unclassified(100)	Eimeriidae_unclassified(100)
Otu0633	32	Eukaryota(100)	Rhizaria(82)	Cercozoa(82)	Cercozoa_unclassified(82)	Cercozoa_unclassified(82)	Cercozoa_unclassified(82)	Cercozoa_unclassified(82)	Cercozoa_unclassified(82)
Otu0634	32	Eukaryota(100)	Archaeplastida(97)	Archaeplastida_unclassified(97)	Archaeplastida_unclassified(97)	Archaeplastida_unclassified(97)	Archaeplastida_unclassified(97)	Archaeplastida_unclassified(97)	Archaeplastida_unclassified(97)
Otu0635	32	Eukaryota(100)	Alveolata(100)	Ciliophora(100)	Spirotrichea(100)	Tintinnida(100)	Tintinnidiidae(100)	Tintinnidium(100)	Tintinnidium_mucicola(100)
Otu0636	32	Eukaryota(100)	Archaeplastida(100)	Chlorophyta(100)	Pyramimonadales(100)	Pyramimonadales_X(100)	Pyramimonadales_XX(100)	Pyramimonas(100)	Pyramimonas_unclassified(100)
Otu0637	32	Eukaryota(100)	Alveolata(100)	Dinoflagellata(100)	Dinophyceae(100)	Dinophyceae_unclassified(100)	Dinophyceae_unclassified(100)	Dinophyceae_unclassified(100)	Dinophyceae_unclassified(100)
Otu0638	32	Eukaryota(100)	Alveolata(100)	Ciliophora(100)	Spirotrichea(100)	Strombidiida(100)	Strombidiidae_F(100)	Strombidium_F(100)	Strombidium_chlorophilum(100)
Otu0639	32	Eukaryota(100)	Archaeplastida(100)	Archaeplastida_unclassified(100)	Archaeplastida_unclassified(100)	Archaeplastida_unclassified(100)	Archaeplastida_unclassified(100)	Archaeplastida_unclassified(100)	Archaeplastida_unclassified(100)
Otu0640	32	Eukaryota(100)	Eukaryota_unclassified(100)	Eukaryota_unclassified(100)	Eukaryota_unclassified(100)	Eukaryota_unclassified(100)	Eukaryota_unclassified(100)	Eukaryota_unclassified(100)	Eukaryota_unclassified(100)
Otu0641	32	Eukaryota(100)	Archaeplastida(100)	Archaeplastida_unclassified(57)	Archaeplastida_unclassified(57)	Archaeplastida_unclassified(57)	Archaeplastida_unclassified(57)	Archaeplastida_unclassified(57)	Archaeplastida_unclassified(57)
Otu0642	32	Eukaryota(100)	Eukaryota_unclassified(88)	Eukaryota_unclassified(88)	Eukaryota_unclassified(88)	Eukaryota_unclassified(88)	Eukaryota_unclassified(88)	Eukaryota_unclassified(88)	Eukaryota_unclassified(88)
Otu0643	31	Eukaryota(100)	Opisthokonta(100)	Fungi(100)	Ascomycota(100)	Pezizomycotina(100)	Dothideomycetes(100)	Dothideomycetes_unclassified(100)	Dothideomycetes_unclassified(100)
Otu0644	31	Eukaryota(100)	Eukaryota_unclassified(100)	Eukaryota_unclassified(100)	Eukaryota_unclassified(100)	Eukaryota_unclassified(100)	Eukaryota_unclassified(100)	Eukaryota_unclassified(100)	Eukaryota_unclassified(100)
Otu0645	31	Eukaryota(100)	Opisthokonta(100)	Metazoa(100)	Mollusca(100)	Gastropoda(100)	Gastropoda_unclassified(100)	Gastropoda_unclassified(100)	Gastropoda_unclassified(100)
Otu0646	31	Eukaryota(100)	Opisthokonta(100)	Fungi(100)	Basidiomycota(100)	Agaricomycotina(100)	Agaricomycetes(100)	Agaricomycetes_unclassified(100)	Agaricomycetes_unclassified(100)
Otu0647	31	Eukaryota(100)	Opisthokonta(100)	Metazoa(100)	Arthropoda(100)	Chelicerata(100)	Arachnida(100)	Demodex(100)	Demodex_brevis(100)
Otu0648	31	Eukaryota(100)	Alveolata(100)	Alveolata_unclassified(52)	Alveolata_unclassified(52)	Alveolata_unclassified(52)	Alveolata_unclassified(52)	Alveolata_unclassified(52)	Alveolata_unclassified(52)
Otu0649	30	Eukaryota(100)	Alveolata(100)	Dinoflagellata(100)	Dinophyceae(100)	Dinophyceae_unclassified(100)	Dinophyceae_unclassified(100)	Dinophyceae_unclassified(100)	Dinophyceae_unclassified(100)
Otu0650	30	Eukaryota(100)	Eukaryota_unclassified(94)	Eukaryota_unclassified(94)	Eukaryota_unclassified(94)	Eukaryota_unclassified(94)	Eukaryota_unclassified(94)	Eukaryota_unclassified(94)	Eukaryota_unclassified(94)
Otu0651	30	Eukaryota(100)	Eukaryota_unclassified(100)	Eukaryota_unclassified(100)	Eukaryota_unclassified(100)	Eukaryota_unclassified(100)	Eukaryota_unclassified(100)	Eukaryota_unclassified(100)	Eukaryota_unclassified(100)
Otu0652	30	Eukaryota(100)	Eukaryota_unclassified(100)	Eukaryota_unclassified(100)	Eukaryota_unclassified(100)	Eukaryota_unclassified(100)	Eukaryota_unclassified(100)	Eukaryota_unclassified(100)	Eukaryota_unclassified(100)
Otu0653	30	Eukaryota(100)	Eukaryota_unclassified(100)	Eukaryota_unclassified(100)	Eukaryota_unclassified(100)	Eukaryota_unclassified(100)	Eukaryota_unclassified(100)	Eukaryota_unclassified(100)	Eukaryota_unclassified(100)
Otu0654	30	Eukaryota(100)	Eukaryota_unclassified(100)	Eukaryota_unclassified(100)	Eukaryota_unclassified(100)	Eukaryota_unclassified(100)	Eukaryota_unclassified(100)	Eukaryota_unclassified(100)	Eukaryota_unclassified(100)
Otu0655	30	Eukaryota(100)	Eukaryota_unclassified(100)	Eukaryota_unclassified(100)	Eukaryota_unclassified(100)	Eukaryota_unclassified(100)	Eukaryota_unclassified(100)	Eukaryota_unclassified(100)	Eukaryota_unclassified(100)
Otu0656	30	Eukaryota(100)	Opisthokonta(100)	Fungi(100)	Ascomycota(100)	Saccharomycotina(100)	Saccharomycetales(100)	Pichia(100)	Pichia_fermentans(100)
Otu0657	30	Eukaryota(100)	Eukaryota_unclassified(100)	Eukaryota_unclassified(100)	Eukaryota_unclassified(100)	Eukaryota_unclassified(100)	Eukaryota_unclassified(100)	Eukaryota_unclassified(100)	Eukaryota_unclassified(100)
Otu0658	30	Eukaryota(100)	Eukaryota_unclassified(100)	Eukaryota_unclassified(100)	Eukaryota_unclassified(100)	Eukaryota_unclassified(100)	Eukaryota_unclassified(100)	Eukaryota_unclassified(100)	Eukaryota_unclassified(100)
Otu0659	30	Eukaryota(100)	Eukaryota_unclassified(100)	Eukaryota_unclassified(100)	Eukaryota_unclassified(100)	Eukaryota_unclassified(100)	Eukaryota_unclassified(100)	Eukaryota_unclassified(100)	Eukaryota_unclassified(100)
Otu0660	29	Eukaryota(100)	Eukaryota_unclassified(100)	Eukaryota_unclassified(100)	Eukaryota_unclassified(100)	Eukaryota_unclassified(100)	Eukaryota_unclassified(100)	Eukaryota_unclassified(100)	Eukaryota_unclassified(100)
Otu0661	29	Eukaryota(100)	Eukaryota_unclassified(100)	Eukaryota_unclassified(100)	Eukaryota_unclassified(100)	Eukaryota_unclassified(100)	Eukaryota_unclassified(100)	Eukaryota_unclassified(100)	Eukaryota_unclassified(100)
Otu0662	29	Eukaryota(100)	Eukaryota_unclassified(100)	Eukaryota_unclassified(100)	Eukaryota_unclassified(100)	Eukaryota_unclassified(100)	Eukaryota_unclassified(100)	Eukaryota_unclassified(100)	Eukaryota_unclassified(100)
Otu0663	29	Eukaryota(100)	Rhizaria(100)	Cercozoa(100)	Filosa-Imbricatea(100)	Thaumatomonadida(100)	Thaumatomonadida_X(80)	Thaumatomonadida_XX(80)	Thaumatomonadida_XX_sp.(80)
Otu0664	29	Eukaryota(100)	Rhizaria(100)	Cercozoa(100)	Endomyxa(100)	Vampyrellida(100)	Sey055-lineage(100)	Sey055-lineage_X(100)	Sey055-lineage_X_sp.(100)
Otu0665	29	Eukaryota(100)	Eukaryota_unclassified(100)	Eukaryota_unclassified(100)	Eukaryota_unclassified(100)	Eukaryota_unclassified(100)	Eukaryota_unclassified(100)	Eukaryota_unclassified(100)	Eukaryota_unclassified(100)
Otu0666	29	Eukaryota(100)	Stramenopiles(94)	Stramenopiles_unclassified(94)	Stramenopiles_unclassified(94)	Stramenopiles_unclassified(94)	Stramenopiles_unclassified(94)	Stramenopiles_unclassified(94)	Stramenopiles_unclassified(94)
Otu0667	29	Eukaryota(100)	Eukaryota_unclassified(100)	Eukaryota_unclassified(100)	Eukaryota_unclassified(100)	Eukaryota_unclassified(100)	Eukaryota_unclassified(100)	Eukaryota_unclassified(100)	Eukaryota_unclassified(100)
Otu0668	29	Eukaryota(100)	Opisthokonta(100)	Metazoa(100)	Craniata(100)	Craniata_X(100)	Teleostei(100)	Teleostei_unclassified(100)	Teleostei_unclassified(100)
Otu0669	29	Eukaryota(100)	Eukaryota_unclassified(100)	Eukaryota_unclassified(100)	Eukaryota_unclassified(100)	Eukaryota_unclassified(100)	Eukaryota_unclassified(100)	Eukaryota_unclassified(100)	Eukaryota_unclassified(100)
Otu0670	28	Eukaryota(100)	Opisthokonta(100)	Fungi(100)	Basidiomycota(100)	Agaricomycotina(100)	Tremellomycetes(100)	Cryptococcus(100)	Cryptococcus_unclassified(97)
Otu0671	28	Eukaryota(100)	Opisthokonta(100)	Fungi(100)	Ascomycota(100)	Pezizomycotina(100)	Pezizomycotina_unclassified(100)	Pezizomycotina_unclassified(100)	Pezizomycotina_unclassified(100)
Otu0672	28	Eukaryota(100)	Opisthokonta(100)	Metazoa(100)	Mollusca(100)	Gastropoda(100)	Nudibranchia(100)	Nudibranchia_unclassified(100)	Nudibranchia_unclassified(100)
Otu0673	28	Eukaryota(100)	Eukaryota_unclassified(100)	Eukaryota_unclassified(100)	Eukaryota_unclassified(100)	Eukaryota_unclassified(100)	Eukaryota_unclassified(100)	Eukaryota_unclassified(100)	Eukaryota_unclassified(100)
Otu0674	28	Eukaryota(100)	Opisthokonta(100)	Metazoa(100)	Craniata(100)	Craniata_X(100)	Teleostei(100)	Teleostei_unclassified(100)	Teleostei_unclassified(100)
Otu0675	28	Eukaryota(100)	Alveolata(100)	Alveolata_unclassified(100)	Alveolata_unclassified(100)	Alveolata_unclassified(100)	Alveolata_unclassified(100)	Alveolata_unclassified(100)	Alveolata_unclassified(100)
Otu0676	28	Eukaryota(100)	Opisthokonta(100)	Metazoa(100)	Platyhelminthes(100)	Trematoda(100)	Digenea(100)	Digenea_unclassified(100)	Digenea_unclassified(100)
Otu0677	28	Eukaryota(100)	Archaeplastida(100)	Archaeplastida_unclassified(100)	Archaeplastida_unclassified(100)	Archaeplastida_unclassified(100)	Archaeplastida_unclassified(100)	Archaeplastida_unclassified(100)	Archaeplastida_unclassified(100)
Otu0678	28	Eukaryota(100)	Archaeplastida(93)	Archaeplastida_unclassified(93)	Archaeplastida_unclassified(93)	Archaeplastida_unclassified(93)	Archaeplastida_unclassified(93)	Archaeplastida_unclassified(93)	Archaeplastida_unclassified(93)
Otu0679	27	Eukaryota(100)	Opisthokonta(100)	Metazoa(100)	Mollusca(100)	Bivalvia(100)	Protobranchia(100)	Nuculana(100)	Nuculana_pernula(100)
Otu0680	27	Eukaryota(100)	Stramenopiles(100)	Opalozoa(100)	MAST-12(100)	MAST-12D(100)	MAST-12D_X(100)	MAST-12D_XX(100)	MAST-12D_XX_sp.(100)
Otu0681	27	Eukaryota(100)	Opisthokonta(100)	Metazoa(100)	Platyhelminthes(100)	Trematoda(100)	Digenea(100)	Digenea_unclassified(100)	Digenea_unclassified(100)
Otu0682	27	Eukaryota(100)	Eukaryota_unclassified(100)	Eukaryota_unclassified(100)	Eukaryota_unclassified(100)	Eukaryota_unclassified(100)	Eukaryota_unclassified(100)	Eukaryota_unclassified(100)	Eukaryota_unclassified(100)
Otu0683	27	Eukaryota(100)	Eukaryota_unclassified(100)	Eukaryota_unclassified(100)	Eukaryota_unclassified(100)	Eukaryota_unclassified(100)	Eukaryota_unclassified(100)	Eukaryota_unclassified(100)	Eukaryota_unclassified(100)
Otu0684	27	Eukaryota(100)	Opisthokonta(100)	Metazoa(100)	Mollusca(100)	Bivalvia(100)	Heteroconchia(100)	Mya(100)	Mya_arenaria(100)
Otu0685	27	Eukaryota(100)	Archaeplastida(100)	Archaeplastida_unclassified(100)	Archaeplastida_unclassified(100)	Archaeplastida_unclassified(100)	Archaeplastida_unclassified(100)	Archaeplastida_unclassified(100)	Archaeplastida_unclassified(100)
Otu0686	27	Eukaryota(100)	Opisthokonta(100)	Metazoa(100)	Mollusca(100)	Gastropoda(100)	Nudibranchia(100)	Nudibranchia_unclassified(100)	Nudibranchia_unclassified(100)
Otu0687	27	Eukaryota(100)	Eukaryota_unclassified(100)	Eukaryota_unclassified(100)	Eukaryota_unclassified(100)	Eukaryota_unclassified(100)	Eukaryota_unclassified(100)	Eukaryota_unclassified(100)	Eukaryota_unclassified(100)
Otu0688	27	Eukaryota(100)	Archaeplastida(97)	Chlorophyta(97)	Mamiellophyceae(97)	Dolichomastigales(97)	Dolichomastigaceae(97)	Dolichomastigaceae-B(97)	Dolichomastigaceae-B_sp.(97)
Otu0689	27	Eukaryota(100)	Eukaryota_unclassified(100)	Eukaryota_unclassified(100)	Eukaryota_unclassified(100)	Eukaryota_unclassified(100)	Eukaryota_unclassified(100)	Eukaryota_unclassified(100)	Eukaryota_unclassified(100)
Otu0690	27	Eukaryota(100)	Eukaryota_unclassified(100)	Eukaryota_unclassified(100)	Eukaryota_unclassified(100)	Eukaryota_unclassified(100)	Eukaryota_unclassified(100)	Eukaryota_unclassified(100)	Eukaryota_unclassified(100)
Otu0691	26	Eukaryota(100)	Rhizaria(100)	Cercozoa(100)	Filosa-Thecofilosea(100)	Cryomonadida(100)	Cryomonadida_unclassified(100)	Cryomonadida_unclassified(100)	Cryomonadida_unclassified(100)
Otu0692	26	Eukaryota(100)	Eukaryota_unclassified(100)	Eukaryota_unclassified(100)	Eukaryota_unclassified(100)	Eukaryota_unclassified(100)	Eukaryota_unclassified(100)	Eukaryota_unclassified(100)	Eukaryota_unclassified(100)
Otu0693	26	Eukaryota(100)	Archaeplastida(100)	Chlorophyta(100)	Pyramimonadales(100)	Pyramimonadales_X(100)	Pyramimonadales_XX(100)	Pyramimonadales_XX_unclassified(100)	Pyramimonadales_XX_unclassified(100)
Otu0694	26	Eukaryota(100)	Eukaryota_unclassified(100)	Eukaryota_unclassified(100)	Eukaryota_unclassified(100)	Eukaryota_unclassified(100)	Eukaryota_unclassified(100)	Eukaryota_unclassified(100)	Eukaryota_unclassified(100)
Otu0695	26	Eukaryota(100)	Opisthokonta(100)	Metazoa(100)	Mollusca(100)	Gastropoda(100)	Nudibranchia(66)	Nudibranchia_unclassified(66)	Nudibranchia_unclassified(66)
Otu0696	26	Eukaryota(100)	Opisthokonta(100)	Opisthokonta_unclassified(100)	Opisthokonta_unclassified(100)	Opisthokonta_unclassified(100)	Opisthokonta_unclassified(100)	Opisthokonta_unclassified(100)	Opisthokonta_unclassified(100)
Otu0697	26	Eukaryota(100)	Eukaryota_unclassified(100)	Eukaryota_unclassified(100)	Eukaryota_unclassified(100)	Eukaryota_unclassified(100)	Eukaryota_unclassified(100)	Eukaryota_unclassified(100)	Eukaryota_unclassified(100)
Otu0698	26	Eukaryota(100)	Eukaryota_unclassified(100)	Eukaryota_unclassified(100)	Eukaryota_unclassified(100)	Eukaryota_unclassified(100)	Eukaryota_unclassified(100)	Eukaryota_unclassified(100)	Eukaryota_unclassified(100)
Otu0699	26	Eukaryota(100)	Stramenopiles(100)	Opalozoa(100)	MAST-12(100)	MAST-12B(100)	MAST-12B_X(100)	MAST-12B_XX(100)	MAST-12B_XX_sp.(100)
Otu0700	26	Eukaryota(100)	Stramenopiles(100)	Pseudofungi(97)	Pirsonia_Clade(97)	Pirsonia_Clade_X(97)	Pirsonia_Clade_XX(97)	Pirsonia_Clade_XX_unclassified(97)	Pirsonia_Clade_XX_unclassified(97)
Otu0701	26	Eukaryota(100)	Eukaryota_unclassified(100)	Eukaryota_unclassified(100)	Eukaryota_unclassified(100)	Eukaryota_unclassified(100)	Eukaryota_unclassified(100)	Eukaryota_unclassified(100)	Eukaryota_unclassified(100)
Otu0702	25	Eukaryota(100)	Opisthokonta(100)	Fungi(100)	Ascomycota(100)	Pezizomycotina(100)	Dothideomycetes(100)	Scleroconidioma(100)	Scleroconidioma_sphagnicola(100)
Otu0703	25	Eukaryota(100)	Eukaryota_unclassified(100)	Eukaryota_unclassified(100)	Eukaryota_unclassified(100)	Eukaryota_unclassified(100)	Eukaryota_unclassified(100)	Eukaryota_unclassified(100)	Eukaryota_unclassified(100)
Otu0704	25	Eukaryota(100)	Archaeplastida(96)	Archaeplastida_unclassified(61)	Archaeplastida_unclassified(61)	Archaeplastida_unclassified(61)	Archaeplastida_unclassified(61)	Archaeplastida_unclassified(61)	Archaeplastida_unclassified(61)
Otu0705	25	Eukaryota(100)	Opisthokonta(100)	Opisthokonta_unclassified(100)	Opisthokonta_unclassified(100)	Opisthokonta_unclassified(100)	Opisthokonta_unclassified(100)	Opisthokonta_unclassified(100)	Opisthokonta_unclassified(100)
Otu0706	25	Eukaryota(100)	Eukaryota_unclassified(100)	Eukaryota_unclassified(100)	Eukaryota_unclassified(100)	Eukaryota_unclassified(100)	Eukaryota_unclassified(100)	Eukaryota_unclassified(100)	Eukaryota_unclassified(100)
Otu0707	25	Eukaryota(100)	Eukaryota_unclassified(100)	Eukaryota_unclassified(100)	Eukaryota_unclassified(100)	Eukaryota_unclassified(100)	Eukaryota_unclassified(100)	Eukaryota_unclassified(100)	Eukaryota_unclassified(100)
Otu0708	25	Eukaryota(100)	Eukaryota_unclassified(100)	Eukaryota_unclassified(100)	Eukaryota_unclassified(100)	Eukaryota_unclassified(100)	Eukaryota_unclassified(100)	Eukaryota_unclassified(100)	Eukaryota_unclassified(100)
Otu0709	25	Eukaryota(100)	Eukaryota_unclassified(100)	Eukaryota_unclassified(100)	Eukaryota_unclassified(100)	Eukaryota_unclassified(100)	Eukaryota_unclassified(100)	Eukaryota_unclassified(100)	Eukaryota_unclassified(100)
Otu0710	25	Eukaryota(100)	Alveolata(100)	Dinoflagellata(100)	Dinophyceae(100)	Dinophyceae_unclassified(100)	Dinophyceae_unclassified(100)	Dinophyceae_unclassified(100)	Dinophyceae_unclassified(100)
Otu0711	25	Eukaryota(100)	Alveolata(100)	Dinoflagellata(100)	Dinophyceae(100)	Gonyaulacales(100)	Goniodomataceae(100)	Alexandrium(100)	Alexandrium_unclassified(84)
Otu0712	25	Eukaryota(100)	Eukaryota_unclassified(100)	Eukaryota_unclassified(100)	Eukaryota_unclassified(100)	Eukaryota_unclassified(100)	Eukaryota_unclassified(100)	Eukaryota_unclassified(100)	Eukaryota_unclassified(100)
Otu0713	25	Eukaryota(100)	Alveolata(100)	Dinoflagellata(100)	Dinophyceae(100)	Gonyaulacales(100)	Goniodomataceae(100)	Alexandrium(100)	Alexandrium_unclassified(84)
Otu0714	24	Eukaryota(100)	Opisthokonta(100)	Metazoa(100)	Nematoda(100)	Chromadorea(100)	Chromadorea_X(100)	Strongyloides(100)	Strongyloides_unclassified(100)
Otu0715	24	Eukaryota(100)	Eukaryota_unclassified(100)	Eukaryota_unclassified(100)	Eukaryota_unclassified(100)	Eukaryota_unclassified(100)	Eukaryota_unclassified(100)	Eukaryota_unclassified(100)	Eukaryota_unclassified(100)
Otu0716	24	Eukaryota(100)	Stramenopiles(100)	Ochrophyta(100)	Bacillariophyta(100)	Bacillariophyta_X(100)	Polar-centric-Mediophyceae(100)	Chaetoceros(100)	Chaetoceros_neogracilis(100)
Otu0717	24	Eukaryota(100)	Stramenopiles(100)	Stramenopiles_unclassified(100)	Stramenopiles_unclassified(100)	Stramenopiles_unclassified(100)	Stramenopiles_unclassified(100)	Stramenopiles_unclassified(100)	Stramenopiles_unclassified(100)
Otu0718	24	Eukaryota(100)	Opisthokonta(100)	Metazoa(100)	Platyhelminthes(100)	Trematoda(100)	Digenea(100)	Digenea_unclassified(100)	Digenea_unclassified(100)
Otu0719	24	Eukaryota(100)	Alveolata(100)	Dinoflagellata(100)	Dinophyceae(100)	Gonyaulacales(100)	Goniodomataceae(100)	Alexandrium(100)	Alexandrium_unclassified(96)
Otu0720	24	Eukaryota(100)	Opisthokonta(100)	Fungi(100)	Ascomycota(100)	Pezizomycotina(100)	Leotiomycetes(100)	Leotiomycetes_unclassified(75)	Leotiomycetes_unclassified(75)
Otu0721	24	Eukaryota(100)	Opisthokonta(100)	Metazoa(100)	Arthropoda(100)	Crustacea(100)	Crustacea_X(100)	Crustacea_XX(100)	Crustacea_XX_sp.(100)
Otu0722	24	Eukaryota(100)	Eukaryota_unclassified(100)	Eukaryota_unclassified(100)	Eukaryota_unclassified(100)	Eukaryota_unclassified(100)	Eukaryota_unclassified(100)	Eukaryota_unclassified(100)	Eukaryota_unclassified(100)
Otu0723	24	Eukaryota(100)	Opisthokonta(100)	Fungi(100)	Ascomycota(100)	Pezizomycotina(100)	Dothideomycetes(84)	Mycosphaerella(59)	Mycosphaerella_punctiformis(59)
Otu0724	23	Eukaryota(100)	Opisthokonta(100)	Fungi(100)	Ascomycota(100)	Pezizomycotina(100)	Pezizomycetes(100)	Ascobolus(100)	Ascobolus_carbonarius(100)
Otu0725	23	Eukaryota(100)	Eukaryota_unclassified(100)	Eukaryota_unclassified(100)	Eukaryota_unclassified(100)	Eukaryota_unclassified(100)	Eukaryota_unclassified(100)	Eukaryota_unclassified(100)	Eukaryota_unclassified(100)
Otu0726	23	Eukaryota(100)	Eukaryota_unclassified(100)	Eukaryota_unclassified(100)	Eukaryota_unclassified(100)	Eukaryota_unclassified(100)	Eukaryota_unclassified(100)	Eukaryota_unclassified(100)	Eukaryota_unclassified(100)
Otu0727	23	Eukaryota(100)	Rhizaria(100)	Cercozoa(100)	Filosa-Thecofilosea(100)	Cryomonadida(100)	Rhogostoma-lineage(100)	Capsellina(100)	Capsellina_sp.(100)
Otu0728	23	Eukaryota(100)	Stramenopiles(92)	Stramenopiles_unclassified(92)	Stramenopiles_unclassified(92)	Stramenopiles_unclassified(92)	Stramenopiles_unclassified(92)	Stramenopiles_unclassified(92)	Stramenopiles_unclassified(92)
Otu0729	23	Eukaryota(100)	Eukaryota_unclassified(100)	Eukaryota_unclassified(100)	Eukaryota_unclassified(100)	Eukaryota_unclassified(100)	Eukaryota_unclassified(100)	Eukaryota_unclassified(100)	Eukaryota_unclassified(100)
Otu0730	23	Eukaryota(100)	Eukaryota_unclassified(100)	Eukaryota_unclassified(100)	Eukaryota_unclassified(100)	Eukaryota_unclassified(100)	Eukaryota_unclassified(100)	Eukaryota_unclassified(100)	Eukaryota_unclassified(100)
Otu0731	23	Eukaryota(100)	Alveolata(100)	Dinoflagellata(100)	Dinophyceae(100)	Dinophyceae_unclassified(100)	Dinophyceae_unclassified(100)	Dinophyceae_unclassified(100)	Dinophyceae_unclassified(100)
Otu0732	23	Eukaryota(100)	Eukaryota_unclassified(100)	Eukaryota_unclassified(100)	Eukaryota_unclassified(100)	Eukaryota_unclassified(100)	Eukaryota_unclassified(100)	Eukaryota_unclassified(100)	Eukaryota_unclassified(100)
Otu0733	23	Eukaryota(100)	Archaeplastida(100)	Rhodophyta(100)	Florideophyceae(100)	Ahnfeltiales(100)	Ahnfeltiaceae(100)	Ahnfeltia(100)	Ahnfeltia_fastigiata(100)
Otu0734	23	Eukaryota(100)	Eukaryota_unclassified(100)	Eukaryota_unclassified(100)	Eukaryota_unclassified(100)	Eukaryota_unclassified(100)	Eukaryota_unclassified(100)	Eukaryota_unclassified(100)	Eukaryota_unclassified(100)
Otu0735	23	Eukaryota(100)	Opisthokonta(100)	Metazoa(100)	Platyhelminthes(100)	Trematoda(100)	Digenea(100)	Digenea_unclassified(100)	Digenea_unclassified(100)
Otu0736	23	Eukaryota(100)	Eukaryota_unclassified(100)	Eukaryota_unclassified(100)	Eukaryota_unclassified(100)	Eukaryota_unclassified(100)	Eukaryota_unclassified(100)	Eukaryota_unclassified(100)	Eukaryota_unclassified(100)
Otu0737	23	Eukaryota(100)	Opisthokonta(100)	Metazoa(100)	Mollusca(100)	Gastropoda(100)	Nudibranchia(100)	Nudibranchia_unclassified(100)	Nudibranchia_unclassified(100)
Otu0738	23	Eukaryota(100)	Rhizaria(100)	Cercozoa(100)	Filosa-Thecofilosea(96)	Ventricleftida(96)	Ventricleftida_X(96)	Ventricleftida_XX(96)	Ventricleftida_XX_sp.(96)
Otu0739	23	Eukaryota(100)	Alveolata(100)	Dinoflagellata(100)	Dinophyceae(100)	Gonyaulacales(100)	Goniodomataceae(100)	Alexandrium(100)	Alexandrium_unclassified(61)
Otu0740	23	Eukaryota(100)	Alveolata(100)	Dinoflagellata(100)	Dinophyceae(100)	Gonyaulacales(100)	Goniodomataceae(100)	Alexandrium(100)	Alexandrium_unclassified(100)
Otu0741	23	Eukaryota(100)	Eukaryota_unclassified(100)	Eukaryota_unclassified(100)	Eukaryota_unclassified(100)	Eukaryota_unclassified(100)	Eukaryota_unclassified(100)	Eukaryota_unclassified(100)	Eukaryota_unclassified(100)
Otu0742	23	Eukaryota(100)	Eukaryota_unclassified(87)	Eukaryota_unclassified(87)	Eukaryota_unclassified(87)	Eukaryota_unclassified(87)	Eukaryota_unclassified(87)	Eukaryota_unclassified(87)	Eukaryota_unclassified(87)
Otu0743	22	Eukaryota(100)	Rhizaria(96)	Cercozoa(96)	Filosa-Imbricatea(96)	Filosa-Imbricatea_X(96)	Novel-clade-2(96)	Novel-clade-2_X(96)	Novel-clade-2_X_sp.(96)
Otu0744	22	Eukaryota(100)	Opisthokonta(100)	Opisthokonta_unclassified(100)	Opisthokonta_unclassified(100)	Opisthokonta_unclassified(100)	Opisthokonta_unclassified(100)	Opisthokonta_unclassified(100)	Opisthokonta_unclassified(100)
Otu0745	22	Eukaryota(100)	Eukaryota_unclassified(100)	Eukaryota_unclassified(100)	Eukaryota_unclassified(100)	Eukaryota_unclassified(100)	Eukaryota_unclassified(100)	Eukaryota_unclassified(100)	Eukaryota_unclassified(100)
Otu0746	22	Eukaryota(100)	Alveolata(100)	Dinoflagellata(100)	Dinophyceae(100)	Gonyaulacales(100)	Goniodomataceae(100)	Alexandrium(100)	Alexandrium_unclassified(100)
Otu0747	22	Eukaryota(100)	Alveolata(100)	Dinoflagellata(100)	Dinophyceae(100)	Peridiniales(100)	Protoperidiniaceae(100)	Protoperidinium(100)	Protoperidinium_pellucidum(100)
Otu0748	22	Eukaryota(100)	Opisthokonta(100)	Metazoa(100)	Platyhelminthes(100)	Trematoda(100)	Digenea(100)	Digenea_unclassified(100)	Digenea_unclassified(100)
Otu0749	22	Eukaryota(100)	Eukaryota_unclassified(100)	Eukaryota_unclassified(100)	Eukaryota_unclassified(100)	Eukaryota_unclassified(100)	Eukaryota_unclassified(100)	Eukaryota_unclassified(100)	Eukaryota_unclassified(100)
Otu0750	22	Eukaryota(100)	Eukaryota_unclassified(100)	Eukaryota_unclassified(100)	Eukaryota_unclassified(100)	Eukaryota_unclassified(100)	Eukaryota_unclassified(100)	Eukaryota_unclassified(100)	Eukaryota_unclassified(100)
Otu0751	22	Eukaryota(100)	Archaeplastida(100)	Chlorophyta(100)	Trebouxiophyceae(100)	Trebouxiophyceae_X(100)	Trebouxiophyceae_XX(100)	Pseudococcomyxa(100)	Pseudococcomyxa_sp.(100)
Otu0752	22	Eukaryota(100)	Stramenopiles(91)	Pseudofungi(91)	MAST-1(91)	MAST-1C(91)	MAST-1C_X(91)	MAST-1C_XX(91)	MAST-1C_XX_sp.(91)
Otu0753	22	Eukaryota(100)	Eukaryota_unclassified(100)	Eukaryota_unclassified(100)	Eukaryota_unclassified(100)	Eukaryota_unclassified(100)	Eukaryota_unclassified(100)	Eukaryota_unclassified(100)	Eukaryota_unclassified(100)
Otu0754	22	Eukaryota(100)	Opisthokonta(100)	Metazoa(100)	Cnidaria(100)	Cnidaria_X(100)	Anthozoa(100)	Actinia(69)	Actinia_equina(69)
Otu0755	22	Eukaryota(100)	Eukaryota_unclassified(100)	Eukaryota_unclassified(100)	Eukaryota_unclassified(100)	Eukaryota_unclassified(100)	Eukaryota_unclassified(100)	Eukaryota_unclassified(100)	Eukaryota_unclassified(100)
Otu0756	22	Eukaryota(100)	Alveolata(100)	Dinoflagellata(100)	Dinophyceae(100)	Gonyaulacales(100)	Goniodomataceae(100)	Alexandrium(100)	Alexandrium_unclassified(64)
Otu0757	22	Eukaryota(100)	Opisthokonta(87)	Opisthokonta_unclassified(87)	Opisthokonta_unclassified(87)	Opisthokonta_unclassified(87)	Opisthokonta_unclassified(87)	Opisthokonta_unclassified(87)	Opisthokonta_unclassified(87)
Otu0758	22	Eukaryota(100)	Eukaryota_unclassified(91)	Eukaryota_unclassified(91)	Eukaryota_unclassified(91)	Eukaryota_unclassified(91)	Eukaryota_unclassified(91)	Eukaryota_unclassified(91)	Eukaryota_unclassified(91)
Otu0759	22	Eukaryota(100)	Eukaryota_unclassified(100)	Eukaryota_unclassified(100)	Eukaryota_unclassified(100)	Eukaryota_unclassified(100)	Eukaryota_unclassified(100)	Eukaryota_unclassified(100)	Eukaryota_unclassified(100)
Otu0760	22	Eukaryota(100)	Eukaryota_unclassified(100)	Eukaryota_unclassified(100)	Eukaryota_unclassified(100)	Eukaryota_unclassified(100)	Eukaryota_unclassified(100)	Eukaryota_unclassified(100)	Eukaryota_unclassified(100)
Otu0761	22	Eukaryota(100)	Eukaryota_unclassified(100)	Eukaryota_unclassified(100)	Eukaryota_unclassified(100)	Eukaryota_unclassified(100)	Eukaryota_unclassified(100)	Eukaryota_unclassified(100)	Eukaryota_unclassified(100)
Otu0762	22	Eukaryota(100)	Eukaryota_unclassified(100)	Eukaryota_unclassified(100)	Eukaryota_unclassified(100)	Eukaryota_unclassified(100)	Eukaryota_unclassified(100)	Eukaryota_unclassified(100)	Eukaryota_unclassified(100)
Otu0763	22	Eukaryota(100)	Eukaryota_unclassified(100)	Eukaryota_unclassified(100)	Eukaryota_unclassified(100)	Eukaryota_unclassified(100)	Eukaryota_unclassified(100)	Eukaryota_unclassified(100)	Eukaryota_unclassified(100)
Otu0764	22	Eukaryota(100)	Stramenopiles(100)	Ochrophyta(100)	Chrysophyceae(96)	Chrysophyceae_X(96)	Chrysophyceae_Clade-H(96)	Chrysophyceae_Clade-H_X(96)	Chrysophyceae_Clade-H_X_sp.(96)
Otu0765	22	Eukaryota(100)	Eukaryota_unclassified(100)	Eukaryota_unclassified(100)	Eukaryota_unclassified(100)	Eukaryota_unclassified(100)	Eukaryota_unclassified(100)	Eukaryota_unclassified(100)	Eukaryota_unclassified(100)
Otu0766	22	Eukaryota(100)	Eukaryota_unclassified(100)	Eukaryota_unclassified(100)	Eukaryota_unclassified(100)	Eukaryota_unclassified(100)	Eukaryota_unclassified(100)	Eukaryota_unclassified(100)	Eukaryota_unclassified(100)
Otu0767	21	Eukaryota(100)	Opisthokonta(100)	Fungi(100)	Basidiomycota(100)	Agaricomycotina(100)	Tremellomycetes(100)	Tremellomycetes_unclassified(100)	Tremellomycetes_unclassified(100)
Otu0768	21	Eukaryota(100)	Opisthokonta(100)	Metazoa(100)	Nematoda(100)	Chromadorea(100)	Chromadorea_X(100)	Strongyloides(100)	Strongyloides_unclassified(100)
Otu0769	21	Eukaryota(100)	Archaeplastida(96)	Archaeplastida_unclassified(96)	Archaeplastida_unclassified(96)	Archaeplastida_unclassified(96)	Archaeplastida_unclassified(96)	Archaeplastida_unclassified(96)	Archaeplastida_unclassified(96)
Otu0770	21	Eukaryota(100)	Eukaryota_unclassified(100)	Eukaryota_unclassified(100)	Eukaryota_unclassified(100)	Eukaryota_unclassified(100)	Eukaryota_unclassified(100)	Eukaryota_unclassified(100)	Eukaryota_unclassified(100)
Otu0771	21	Eukaryota(100)	Eukaryota_unclassified(100)	Eukaryota_unclassified(100)	Eukaryota_unclassified(100)	Eukaryota_unclassified(100)	Eukaryota_unclassified(100)	Eukaryota_unclassified(100)	Eukaryota_unclassified(100)
Otu0772	21	Eukaryota(100)	Alveolata(100)	Dinoflagellata(100)	Dinophyceae(100)	Gonyaulacales(100)	Gonyaulacaceae(100)	Amylax(100)	Amylax_buxus(100)
Otu0773	21	Eukaryota(100)	Alveolata(100)	Ciliophora(100)	Colpodea(100)	Colpodea_X(100)	Colpodida(100)	Colpodida_unclassified(100)	Colpodida_unclassified(100)
Otu0774	21	Eukaryota(100)	Eukaryota_unclassified(96)	Eukaryota_unclassified(96)	Eukaryota_unclassified(96)	Eukaryota_unclassified(96)	Eukaryota_unclassified(96)	Eukaryota_unclassified(96)	Eukaryota_unclassified(96)
Otu0775	21	Eukaryota(100)	Eukaryota_unclassified(100)	Eukaryota_unclassified(100)	Eukaryota_unclassified(100)	Eukaryota_unclassified(100)	Eukaryota_unclassified(100)	Eukaryota_unclassified(100)	Eukaryota_unclassified(100)
Otu0776	21	Eukaryota(100)	Opisthokonta(100)	Metazoa(100)	Craniata(100)	Craniata_X(100)	Craniata_X_unclassified(100)	Craniata_X_unclassified(100)	Craniata_X_unclassified(100)
Otu0777	21	Eukaryota(100)	Archaeplastida(100)	Archaeplastida_unclassified(100)	Archaeplastida_unclassified(100)	Archaeplastida_unclassified(100)	Archaeplastida_unclassified(100)	Archaeplastida_unclassified(100)	Archaeplastida_unclassified(100)
Otu0778	21	Eukaryota(100)	Eukaryota_unclassified(100)	Eukaryota_unclassified(100)	Eukaryota_unclassified(100)	Eukaryota_unclassified(100)	Eukaryota_unclassified(100)	Eukaryota_unclassified(100)	Eukaryota_unclassified(100)
Otu0779	21	Eukaryota(100)	Eukaryota_unclassified(100)	Eukaryota_unclassified(100)	Eukaryota_unclassified(100)	Eukaryota_unclassified(100)	Eukaryota_unclassified(100)	Eukaryota_unclassified(100)	Eukaryota_unclassified(100)
Otu0780	21	Eukaryota(100)	Opisthokonta(100)	Opisthokonta_unclassified(100)	Opisthokonta_unclassified(100)	Opisthokonta_unclassified(100)	Opisthokonta_unclassified(100)	Opisthokonta_unclassified(100)	Opisthokonta_unclassified(100)
Otu0781	21	Eukaryota(100)	Opisthokonta(100)	Metazoa(100)	Mollusca(100)	Gastropoda(100)	Gastropoda_unclassified(72)	Gastropoda_unclassified(72)	Gastropoda_unclassified(72)
Otu0782	21	Eukaryota(100)	Opisthokonta(100)	Metazoa(100)	Platyhelminthes(100)	Trematoda(100)	Digenea(100)	Digenea_unclassified(100)	Digenea_unclassified(100)
Otu0783	21	Eukaryota(100)	Opisthokonta(100)	Metazoa(100)	Nematoda(100)	Chromadorea(100)	Chromadorea_X(100)	Chromadorea_X_unclassified(91)	Chromadorea_X_unclassified(91)
Otu0784	21	Eukaryota(100)	Alveolata(100)	Dinoflagellata(100)	Dinophyceae(100)	Gonyaulacales(100)	Goniodomataceae(100)	Alexandrium(100)	Alexandrium_unclassified(62)
Otu0785	21	Eukaryota(100)	Opisthokonta(100)	Metazoa(100)	Arthropoda(100)	Crustacea(100)	Maxillopoda(100)	Pseudocalanus(100)	Pseudocalanus_unclassified(100)
Otu0786	21	Eukaryota(100)	Alveolata(100)	Dinoflagellata(100)	Dinophyceae(100)	Gonyaulacales(100)	Goniodomataceae(100)	Alexandrium(100)	Alexandrium_unclassified(96)
Otu0787	21	Eukaryota(100)	Eukaryota_unclassified(100)	Eukaryota_unclassified(100)	Eukaryota_unclassified(100)	Eukaryota_unclassified(100)	Eukaryota_unclassified(100)	Eukaryota_unclassified(100)	Eukaryota_unclassified(100)
Otu0788	21	Eukaryota(100)	Eukaryota_unclassified(100)	Eukaryota_unclassified(100)	Eukaryota_unclassified(100)	Eukaryota_unclassified(100)	Eukaryota_unclassified(100)	Eukaryota_unclassified(100)	Eukaryota_unclassified(100)
Otu0789	21	Eukaryota(100)	Opisthokonta(100)	Fungi(100)	Basidiomycota(100)	Pucciniomycotina(100)	Cystobasidiomycetes(100)	Cystobasidiomycetes_unclassified(100)	Cystobasidiomycetes_unclassified(100)
Otu0790	21	Eukaryota(100)	Eukaryota_unclassified(100)	Eukaryota_unclassified(100)	Eukaryota_unclassified(100)	Eukaryota_unclassified(100)	Eukaryota_unclassified(100)	Eukaryota_unclassified(100)	Eukaryota_unclassified(100)
Otu0791	20	Eukaryota(100)	Eukaryota_unclassified(75)	Eukaryota_unclassified(75)	Eukaryota_unclassified(75)	Eukaryota_unclassified(75)	Eukaryota_unclassified(75)	Eukaryota_unclassified(75)	Eukaryota_unclassified(75)
Otu0792	20	Eukaryota(100)	Opisthokonta(100)	Fungi(100)	Basidiomycota(100)	Basidiomycota_unclassified(100)	Basidiomycota_unclassified(100)	Basidiomycota_unclassified(100)	Basidiomycota_unclassified(100)
Otu0793	20	Eukaryota(100)	Opisthokonta(100)	Metazoa(100)	Mollusca(100)	Gastropoda(100)	Nudibranchia(100)	Nudibranchia_unclassified(100)	Nudibranchia_unclassified(100)
Otu0794	20	Eukaryota(100)	Archaeplastida(75)	Archaeplastida_unclassified(75)	Archaeplastida_unclassified(75)	Archaeplastida_unclassified(75)	Archaeplastida_unclassified(75)	Archaeplastida_unclassified(75)	Archaeplastida_unclassified(75)
Otu0795	20	Eukaryota(100)	Opisthokonta(100)	Metazoa(100)	Platyhelminthes(100)	Trematoda(100)	Digenea(100)	Digenea_unclassified(100)	Digenea_unclassified(100)
Otu0796	20	Eukaryota(100)	Opisthokonta(100)	Metazoa(100)	Metazoa_unclassified(100)	Metazoa_unclassified(100)	Metazoa_unclassified(100)	Metazoa_unclassified(100)	Metazoa_unclassified(100)
Otu0797	20	Eukaryota(100)	Eukaryota_unclassified(95)	Eukaryota_unclassified(95)	Eukaryota_unclassified(95)	Eukaryota_unclassified(95)	Eukaryota_unclassified(95)	Eukaryota_unclassified(95)	Eukaryota_unclassified(95)
Otu0798	20	Eukaryota(100)	Opisthokonta(100)	Metazoa(100)	Platyhelminthes(100)	Trematoda(100)	Digenea(100)	Digenea_unclassified(100)	Digenea_unclassified(100)
Otu0799	20	Eukaryota(100)	Archaeplastida(100)	Archaeplastida_unclassified(85)	Archaeplastida_unclassified(85)	Archaeplastida_unclassified(85)	Archaeplastida_unclassified(85)	Archaeplastida_unclassified(85)	Archaeplastida_unclassified(85)
Otu0800	20	Eukaryota(100)	Opisthokonta(100)	Metazoa(100)	Acanthocephala(100)	Acanthocephala_X(100)	Acanthocephala_XX(100)	Corynosoma(55)	Corynosoma_unclassified(55)
Otu0801	20	Eukaryota(100)	Opisthokonta(100)	Metazoa(100)	Metazoa_unclassified(55)	Metazoa_unclassified(55)	Metazoa_unclassified(55)	Metazoa_unclassified(55)	Metazoa_unclassified(55)
Otu0802	20	Eukaryota(100)	Eukaryota_unclassified(100)	Eukaryota_unclassified(100)	Eukaryota_unclassified(100)	Eukaryota_unclassified(100)	Eukaryota_unclassified(100)	Eukaryota_unclassified(100)	Eukaryota_unclassified(100)
Otu0803	20	Eukaryota(100)	Alveolata(100)	Dinoflagellata(100)	Dinophyceae(100)	Gonyaulacales(100)	Goniodomataceae(100)	Alexandrium(95)	Alexandrium_unclassified(85)
Otu0804	20	Eukaryota(100)	Eukaryota_unclassified(100)	Eukaryota_unclassified(100)	Eukaryota_unclassified(100)	Eukaryota_unclassified(100)	Eukaryota_unclassified(100)	Eukaryota_unclassified(100)	Eukaryota_unclassified(100)
Otu0805	20	Eukaryota(100)	Eukaryota_unclassified(100)	Eukaryota_unclassified(100)	Eukaryota_unclassified(100)	Eukaryota_unclassified(100)	Eukaryota_unclassified(100)	Eukaryota_unclassified(100)	Eukaryota_unclassified(100)
Otu0806	20	Eukaryota(100)	Opisthokonta(100)	Metazoa(100)	Acanthocephala(100)	Acanthocephala_X(100)	Acanthocephala_XX(100)	Corynosoma(85)	Corynosoma_unclassified(85)
Otu0807	20	Eukaryota(100)	Opisthokonta(100)	Metazoa(100)	Craniata(100)	Craniata_X(100)	Craniata_X_unclassified(100)	Craniata_X_unclassified(100)	Craniata_X_unclassified(100)
Otu0808	20	Eukaryota(100)	Archaeplastida(100)	Archaeplastida_unclassified(100)	Archaeplastida_unclassified(100)	Archaeplastida_unclassified(100)	Archaeplastida_unclassified(100)	Archaeplastida_unclassified(100)	Archaeplastida_unclassified(100)
Otu0809	20	Eukaryota(100)	Eukaryota_unclassified(100)	Eukaryota_unclassified(100)	Eukaryota_unclassified(100)	Eukaryota_unclassified(100)	Eukaryota_unclassified(100)	Eukaryota_unclassified(100)	Eukaryota_unclassified(100)
Otu0810	20	Eukaryota(100)	Eukaryota_unclassified(100)	Eukaryota_unclassified(100)	Eukaryota_unclassified(100)	Eukaryota_unclassified(100)	Eukaryota_unclassified(100)	Eukaryota_unclassified(100)	Eukaryota_unclassified(100)
Otu0811	19	Eukaryota(100)	Eukaryota_unclassified(100)	Eukaryota_unclassified(100)	Eukaryota_unclassified(100)	Eukaryota_unclassified(100)	Eukaryota_unclassified(100)	Eukaryota_unclassified(100)	Eukaryota_unclassified(100)
Otu0812	19	Eukaryota(100)	Eukaryota_unclassified(100)	Eukaryota_unclassified(100)	Eukaryota_unclassified(100)	Eukaryota_unclassified(100)	Eukaryota_unclassified(100)	Eukaryota_unclassified(100)	Eukaryota_unclassified(100)
Otu0813	19	Eukaryota(100)	Eukaryota_unclassified(100)	Eukaryota_unclassified(100)	Eukaryota_unclassified(100)	Eukaryota_unclassified(100)	Eukaryota_unclassified(100)	Eukaryota_unclassified(100)	Eukaryota_unclassified(100)
Otu0814	19	Eukaryota(100)	Opisthokonta(100)	Metazoa(100)	Mollusca(100)	Gastropoda(100)	Nudibranchia(100)	Nudibranchia_unclassified(100)	Nudibranchia_unclassified(100)
Otu0815	19	Eukaryota(100)	Opisthokonta(100)	Fungi(100)	Ascomycota(100)	Pezizomycotina(100)	Eurotiomycetes(100)	Eurotiomycetes_unclassified(90)	Eurotiomycetes_unclassified(90)
Otu0816	19	Eukaryota(100)	Alveolata(100)	Dinoflagellata(100)	Dinophyceae(100)	Gonyaulacales(100)	Goniodomataceae(100)	Alexandrium(100)	Alexandrium_unclassified(100)
Otu0817	19	Eukaryota(100)	Eukaryota_unclassified(100)	Eukaryota_unclassified(100)	Eukaryota_unclassified(100)	Eukaryota_unclassified(100)	Eukaryota_unclassified(100)	Eukaryota_unclassified(100)	Eukaryota_unclassified(100)
Otu0818	19	Eukaryota(100)	Eukaryota_unclassified(100)	Eukaryota_unclassified(100)	Eukaryota_unclassified(100)	Eukaryota_unclassified(100)	Eukaryota_unclassified(100)	Eukaryota_unclassified(100)	Eukaryota_unclassified(100)
Otu0819	19	Eukaryota(100)	Eukaryota_unclassified(100)	Eukaryota_unclassified(100)	Eukaryota_unclassified(100)	Eukaryota_unclassified(100)	Eukaryota_unclassified(100)	Eukaryota_unclassified(100)	Eukaryota_unclassified(100)
Otu0820	19	Eukaryota(100)	Alveolata(100)	Dinoflagellata(100)	Dinophyceae(100)	Gonyaulacales(100)	Goniodomataceae(100)	Alexandrium(100)	Alexandrium_unclassified(58)
Otu0821	19	Eukaryota(100)	Eukaryota_unclassified(100)	Eukaryota_unclassified(100)	Eukaryota_unclassified(100)	Eukaryota_unclassified(100)	Eukaryota_unclassified(100)	Eukaryota_unclassified(100)	Eukaryota_unclassified(100)
Otu0822	19	Eukaryota(100)	Opisthokonta(100)	Metazoa(100)	Platyhelminthes(100)	Trematoda(100)	Digenea(100)	Digenea_unclassified(100)	Digenea_unclassified(100)
Otu0823	19	Eukaryota(100)	Eukaryota_unclassified(100)	Eukaryota_unclassified(100)	Eukaryota_unclassified(100)	Eukaryota_unclassified(100)	Eukaryota_unclassified(100)	Eukaryota_unclassified(100)	Eukaryota_unclassified(100)
Otu0824	19	Eukaryota(100)	Eukaryota_unclassified(100)	Eukaryota_unclassified(100)	Eukaryota_unclassified(100)	Eukaryota_unclassified(100)	Eukaryota_unclassified(100)	Eukaryota_unclassified(100)	Eukaryota_unclassified(100)
Otu0825	19	Eukaryota(100)	Eukaryota_unclassified(100)	Eukaryota_unclassified(100)	Eukaryota_unclassified(100)	Eukaryota_unclassified(100)	Eukaryota_unclassified(100)	Eukaryota_unclassified(100)	Eukaryota_unclassified(100)
Otu0826	19	Eukaryota(100)	Opisthokonta(100)	Metazoa(100)	Mollusca(100)	Gastropoda(100)	Gastropoda_unclassified(100)	Gastropoda_unclassified(100)	Gastropoda_unclassified(100)
Otu0827	19	Eukaryota(100)	Eukaryota_unclassified(100)	Eukaryota_unclassified(100)	Eukaryota_unclassified(100)	Eukaryota_unclassified(100)	Eukaryota_unclassified(100)	Eukaryota_unclassified(100)	Eukaryota_unclassified(100)
Otu0828	18	Eukaryota(100)	Opisthokonta(100)	Metazoa(100)	Arthropoda(100)	Crustacea(100)	Malacostraca(100)	Malacostraca_unclassified(100)	Malacostraca_unclassified(100)
Otu0829	18	Eukaryota(100)	Alveolata(100)	Dinoflagellata(100)	Dinophyceae(100)	Gymnodiniales(100)	Gymnodiniaceae(100)	Gymnodiniaceae_unclassified(100)	Gymnodiniaceae_unclassified(100)
Otu0830	18	Eukaryota(100)	Alveolata(100)	Alveolata_unclassified(100)	Alveolata_unclassified(100)	Alveolata_unclassified(100)	Alveolata_unclassified(100)	Alveolata_unclassified(100)	Alveolata_unclassified(100)
Otu0831	18	Eukaryota(100)	Opisthokonta(100)	Metazoa(100)	Mollusca(100)	Bivalvia(100)	Heteroconchia(100)	Hiatella(100)	Hiatella_arctica(100)
Otu0832	18	Eukaryota(100)	Alveolata(100)	Dinoflagellata(100)	Dinophyceae(100)	Gonyaulacales(100)	Goniodomataceae(100)	Alexandrium(100)	Alexandrium_fundyense(73)
Otu0833	18	Eukaryota(100)	Archaeplastida(100)	Chlorophyta(100)	Chlorophyceae(100)	Sphaeropleales(100)	Sphaeropleales_X(100)	Sphaeropleales_X_unclassified(67)	Sphaeropleales_X_unclassified(67)
Otu0834	18	Eukaryota(100)	Opisthokonta(100)	Metazoa(100)	Acanthocephala(100)	Acanthocephala_X(100)	Acanthocephala_XX(100)	Acanthocephala_XX_unclassified(100)	Acanthocephala_XX_unclassified(100)
Otu0835	18	Eukaryota(100)	Eukaryota_unclassified(100)	Eukaryota_unclassified(100)	Eukaryota_unclassified(100)	Eukaryota_unclassified(100)	Eukaryota_unclassified(100)	Eukaryota_unclassified(100)	Eukaryota_unclassified(100)
Otu0836	18	Eukaryota(100)	Eukaryota_unclassified(100)	Eukaryota_unclassified(100)	Eukaryota_unclassified(100)	Eukaryota_unclassified(100)	Eukaryota_unclassified(100)	Eukaryota_unclassified(100)	Eukaryota_unclassified(100)
Otu0837	18	Eukaryota(100)	Opisthokonta(100)	Metazoa(100)	Platyhelminthes(100)	Trematoda(100)	Digenea(100)	Digenea_unclassified(100)	Digenea_unclassified(100)
Otu0838	18	Eukaryota(100)	Eukaryota_unclassified(100)	Eukaryota_unclassified(100)	Eukaryota_unclassified(100)	Eukaryota_unclassified(100)	Eukaryota_unclassified(100)	Eukaryota_unclassified(100)	Eukaryota_unclassified(100)
Otu0839	18	Eukaryota(100)	Stramenopiles(100)	Sagenista(89)	Labyrinthulomycetes(78)	Labyrinthulomycetes_unclassified(73)	Labyrinthulomycetes_unclassified(73)	Labyrinthulomycetes_unclassified(73)	Labyrinthulomycetes_unclassified(73)
Otu0840	18	Eukaryota(100)	Rhizaria(100)	Cercozoa(100)	Filosa-Thecofilosea(100)	Filosa-Thecofilosea_unclassified(89)	Filosa-Thecofilosea_unclassified(89)	Filosa-Thecofilosea_unclassified(89)	Filosa-Thecofilosea_unclassified(89)
Otu0841	18	Eukaryota(100)	Eukaryota_unclassified(100)	Eukaryota_unclassified(100)	Eukaryota_unclassified(100)	Eukaryota_unclassified(100)	Eukaryota_unclassified(100)	Eukaryota_unclassified(100)	Eukaryota_unclassified(100)
Otu0842	18	Eukaryota(100)	Stramenopiles(100)	Ochrophyta(100)	Chrysophyceae(100)	Chrysophyceae_X(100)	Chrysophyceae_Clade-C(100)	Spumella(100)	Spumella_unclassified(95)
Otu0843	17	Eukaryota(100)	Eukaryota_unclassified(100)	Eukaryota_unclassified(100)	Eukaryota_unclassified(100)	Eukaryota_unclassified(100)	Eukaryota_unclassified(100)	Eukaryota_unclassified(100)	Eukaryota_unclassified(100)
Otu0844	17	Eukaryota(100)	Opisthokonta(100)	Metazoa(100)	Metazoa_unclassified(100)	Metazoa_unclassified(100)	Metazoa_unclassified(100)	Metazoa_unclassified(100)	Metazoa_unclassified(100)
Otu0845	17	Eukaryota(100)	Archaeplastida(100)	Chlorophyta(100)	Nephroselmidophyceae(100)	Nephroselmidales(100)	Nephroselmidales_X(100)	Nephroselmis(100)	Nephroselmis_pyriformis(100)
Otu0846	17	Eukaryota(100)	Opisthokonta(100)	Fungi(100)	Ascomycota(100)	Pezizomycotina(100)	Eurotiomycetes(100)	Penicillium(89)	Penicillium_namyslowskii(83)
Otu0847	17	Eukaryota(100)	Eukaryota_unclassified(100)	Eukaryota_unclassified(100)	Eukaryota_unclassified(100)	Eukaryota_unclassified(100)	Eukaryota_unclassified(100)	Eukaryota_unclassified(100)	Eukaryota_unclassified(100)
Otu0848	17	Eukaryota(100)	Eukaryota_unclassified(100)	Eukaryota_unclassified(100)	Eukaryota_unclassified(100)	Eukaryota_unclassified(100)	Eukaryota_unclassified(100)	Eukaryota_unclassified(100)	Eukaryota_unclassified(100)
Otu0849	17	Eukaryota(100)	Eukaryota_unclassified(100)	Eukaryota_unclassified(100)	Eukaryota_unclassified(100)	Eukaryota_unclassified(100)	Eukaryota_unclassified(100)	Eukaryota_unclassified(100)	Eukaryota_unclassified(100)
Otu0850	17	Eukaryota(100)	Rhizaria(100)	Cercozoa(100)	Filosa-Thecofilosea(100)	Ventricleftida(100)	CCW10-lineage(100)	CCW10-lineage_X(100)	CCW10-lineage_X_sp.(100)
Otu0851	17	Eukaryota(100)	Stramenopiles(100)	Ochrophyta(100)	Bacillariophyta(100)	Bacillariophyta_X(100)	Polar-centric-Mediophyceae(100)	Chaetoceros(100)	Chaetoceros_unclassified(100)
Otu0852	17	Eukaryota(100)	Opisthokonta(100)	Metazoa(100)	Arthropoda(100)	Hexapoda(100)	Hexapoda_unclassified(100)	Hexapoda_unclassified(100)	Hexapoda_unclassified(100)
Otu0853	17	Eukaryota(100)	Archaeplastida(100)	Streptophyta(100)	Embryophyceae(100)	Embryophyceae_X(100)	Embryophyceae_XX(100)	Embryophyceae_XX_unclassified(100)	Embryophyceae_XX_unclassified(100)
Otu0854	17	Eukaryota(100)	Eukaryota_unclassified(100)	Eukaryota_unclassified(100)	Eukaryota_unclassified(100)	Eukaryota_unclassified(100)	Eukaryota_unclassified(100)	Eukaryota_unclassified(100)	Eukaryota_unclassified(100)
Otu0855	17	Eukaryota(100)	Alveolata(100)	Dinoflagellata(100)	Dinophyceae(100)	Gonyaulacales(100)	Goniodomataceae(100)	Alexandrium(100)	Alexandrium_unclassified(95)
Otu0856	17	Eukaryota(100)	Opisthokonta(100)	Fungi(100)	Ascomycota(100)	Pezizomycotina(100)	Eurotiomycetes(100)	Knufia(89)	Knufia_cryptophialidica(89)
Otu0857	17	Eukaryota(100)	Eukaryota_unclassified(100)	Eukaryota_unclassified(100)	Eukaryota_unclassified(100)	Eukaryota_unclassified(100)	Eukaryota_unclassified(100)	Eukaryota_unclassified(100)	Eukaryota_unclassified(100)
Otu0858	17	Eukaryota(100)	Stramenopiles(100)	Opalozoa(100)	MAST-12(100)	MAST-12D(100)	MAST-12D_X(100)	MAST-12D_XX(100)	MAST-12D_XX_sp.(100)
Otu0859	17	Eukaryota(100)	Archaeplastida(100)	Chlorophyta(100)	Mamiellophyceae(100)	Mamiellophyceae_unclassified(100)	Mamiellophyceae_unclassified(100)	Mamiellophyceae_unclassified(100)	Mamiellophyceae_unclassified(100)
Otu0860	17	Eukaryota(100)	Alveolata(100)	Dinoflagellata(100)	Dinophyceae(100)	Gonyaulacales(100)	Goniodomataceae(100)	Alexandrium(100)	Alexandrium_unclassified(100)
Otu0861	17	Eukaryota(100)	Eukaryota_unclassified(100)	Eukaryota_unclassified(100)	Eukaryota_unclassified(100)	Eukaryota_unclassified(100)	Eukaryota_unclassified(100)	Eukaryota_unclassified(100)	Eukaryota_unclassified(100)
Otu0862	17	Eukaryota(100)	Eukaryota_unclassified(100)	Eukaryota_unclassified(100)	Eukaryota_unclassified(100)	Eukaryota_unclassified(100)	Eukaryota_unclassified(100)	Eukaryota_unclassified(100)	Eukaryota_unclassified(100)
Otu0863	17	Eukaryota(100)	Stramenopiles(95)	Stramenopiles_unclassified(95)	Stramenopiles_unclassified(95)	Stramenopiles_unclassified(95)	Stramenopiles_unclassified(95)	Stramenopiles_unclassified(95)	Stramenopiles_unclassified(95)
Otu0864	16	Eukaryota(100)	Eukaryota_unclassified(100)	Eukaryota_unclassified(100)	Eukaryota_unclassified(100)	Eukaryota_unclassified(100)	Eukaryota_unclassified(100)	Eukaryota_unclassified(100)	Eukaryota_unclassified(100)
Otu0865	16	Eukaryota(100)	Eukaryota_unclassified(100)	Eukaryota_unclassified(100)	Eukaryota_unclassified(100)	Eukaryota_unclassified(100)	Eukaryota_unclassified(100)	Eukaryota_unclassified(100)	Eukaryota_unclassified(100)
Otu0866	16	Eukaryota(100)	Alveolata(100)	Dinoflagellata(100)	Dinophyceae(100)	Dinophyceae_unclassified(100)	Dinophyceae_unclassified(100)	Dinophyceae_unclassified(100)	Dinophyceae_unclassified(100)
Otu0867	16	Eukaryota(100)	Eukaryota_unclassified(100)	Eukaryota_unclassified(100)	Eukaryota_unclassified(100)	Eukaryota_unclassified(100)	Eukaryota_unclassified(100)	Eukaryota_unclassified(100)	Eukaryota_unclassified(100)
Otu0868	16	Eukaryota(100)	Eukaryota_unclassified(100)	Eukaryota_unclassified(100)	Eukaryota_unclassified(100)	Eukaryota_unclassified(100)	Eukaryota_unclassified(100)	Eukaryota_unclassified(100)	Eukaryota_unclassified(100)
Otu0869	16	Eukaryota(100)	Stramenopiles(100)	Sagenista(100)	Labyrinthulomycetes(100)	Labyrinthulomycetes_unclassified(100)	Labyrinthulomycetes_unclassified(100)	Labyrinthulomycetes_unclassified(100)	Labyrinthulomycetes_unclassified(100)
Otu0870	16	Eukaryota(100)	Rhizaria(100)	Cercozoa(100)	Filosa-Thecofilosea(100)	Ebriida(100)	Ebriidae(88)	Ebria(88)	Ebria_tripartita(88)
Otu0871	16	Eukaryota(100)	Eukaryota_unclassified(100)	Eukaryota_unclassified(100)	Eukaryota_unclassified(100)	Eukaryota_unclassified(100)	Eukaryota_unclassified(100)	Eukaryota_unclassified(100)	Eukaryota_unclassified(100)
Otu0872	16	Eukaryota(100)	Eukaryota_unclassified(100)	Eukaryota_unclassified(100)	Eukaryota_unclassified(100)	Eukaryota_unclassified(100)	Eukaryota_unclassified(100)	Eukaryota_unclassified(100)	Eukaryota_unclassified(100)
Otu0873	16	Eukaryota(100)	Eukaryota_unclassified(100)	Eukaryota_unclassified(100)	Eukaryota_unclassified(100)	Eukaryota_unclassified(100)	Eukaryota_unclassified(100)	Eukaryota_unclassified(100)	Eukaryota_unclassified(100)
Otu0874	16	Eukaryota(100)	Eukaryota_unclassified(100)	Eukaryota_unclassified(100)	Eukaryota_unclassified(100)	Eukaryota_unclassified(100)	Eukaryota_unclassified(100)	Eukaryota_unclassified(100)	Eukaryota_unclassified(100)
Otu0875	16	Eukaryota(100)	Eukaryota_unclassified(100)	Eukaryota_unclassified(100)	Eukaryota_unclassified(100)	Eukaryota_unclassified(100)	Eukaryota_unclassified(100)	Eukaryota_unclassified(100)	Eukaryota_unclassified(100)
Otu0876	16	Eukaryota(100)	Eukaryota_unclassified(100)	Eukaryota_unclassified(100)	Eukaryota_unclassified(100)	Eukaryota_unclassified(100)	Eukaryota_unclassified(100)	Eukaryota_unclassified(100)	Eukaryota_unclassified(100)
Otu0877	16	Eukaryota(100)	Alveolata(100)	Dinoflagellata(100)	Dinophyceae(100)	Gonyaulacales(100)	Goniodomataceae(100)	Alexandrium(100)	Alexandrium_unclassified(100)
Otu0878	16	Eukaryota(100)	Eukaryota_unclassified(100)	Eukaryota_unclassified(100)	Eukaryota_unclassified(100)	Eukaryota_unclassified(100)	Eukaryota_unclassified(100)	Eukaryota_unclassified(100)	Eukaryota_unclassified(100)
Otu0879	16	Eukaryota(100)	Eukaryota_unclassified(100)	Eukaryota_unclassified(100)	Eukaryota_unclassified(100)	Eukaryota_unclassified(100)	Eukaryota_unclassified(100)	Eukaryota_unclassified(100)	Eukaryota_unclassified(100)
Otu0880	16	Eukaryota(100)	Alveolata(100)	Dinoflagellata(100)	Dinophyceae(100)	Gonyaulacales(100)	Goniodomataceae(100)	Alexandrium(100)	Alexandrium_unclassified(88)
Otu0881	16	Eukaryota(100)	Eukaryota_unclassified(100)	Eukaryota_unclassified(100)	Eukaryota_unclassified(100)	Eukaryota_unclassified(100)	Eukaryota_unclassified(100)	Eukaryota_unclassified(100)	Eukaryota_unclassified(100)
Otu0882	16	Eukaryota(100)	Eukaryota_unclassified(100)	Eukaryota_unclassified(100)	Eukaryota_unclassified(100)	Eukaryota_unclassified(100)	Eukaryota_unclassified(100)	Eukaryota_unclassified(100)	Eukaryota_unclassified(100)
Otu0883	16	Eukaryota(100)	Eukaryota_unclassified(100)	Eukaryota_unclassified(100)	Eukaryota_unclassified(100)	Eukaryota_unclassified(100)	Eukaryota_unclassified(100)	Eukaryota_unclassified(100)	Eukaryota_unclassified(100)
Otu0884	16	Eukaryota(100)	Eukaryota_unclassified(100)	Eukaryota_unclassified(100)	Eukaryota_unclassified(100)	Eukaryota_unclassified(100)	Eukaryota_unclassified(100)	Eukaryota_unclassified(100)	Eukaryota_unclassified(100)
Otu0885	16	Eukaryota(100)	Eukaryota_unclassified(100)	Eukaryota_unclassified(100)	Eukaryota_unclassified(100)	Eukaryota_unclassified(100)	Eukaryota_unclassified(100)	Eukaryota_unclassified(100)	Eukaryota_unclassified(100)
Otu0886	16	Eukaryota(100)	Alveolata(100)	Dinoflagellata(100)	Dinophyceae(100)	Gonyaulacales(100)	Goniodomataceae(100)	Alexandrium(100)	Alexandrium_unclassified(100)
Otu0887	16	Eukaryota(100)	Eukaryota_unclassified(100)	Eukaryota_unclassified(100)	Eukaryota_unclassified(100)	Eukaryota_unclassified(100)	Eukaryota_unclassified(100)	Eukaryota_unclassified(100)	Eukaryota_unclassified(100)
Otu0888	15	Eukaryota(100)	Opisthokonta(100)	Metazoa(100)	Nematoda(100)	Chromadorea(100)	Chromadorea_X(100)	Oslerus(94)	Oslerus_unclassified(94)
Otu0889	15	Eukaryota(100)	Opisthokonta(100)	Metazoa(100)	Echinodermata(100)	Echinodermata_X(100)	Echinodermata_XX(100)	Echinodermata_XX_unclassified(100)	Echinodermata_XX_unclassified(100)
Otu0890	15	Eukaryota(100)	Eukaryota_unclassified(100)	Eukaryota_unclassified(100)	Eukaryota_unclassified(100)	Eukaryota_unclassified(100)	Eukaryota_unclassified(100)	Eukaryota_unclassified(100)	Eukaryota_unclassified(100)
Otu0891	15	Eukaryota(100)	Alveolata(100)	Ciliophora(100)	Phyllopharyngea(100)	Cyrtophoria_7(100)	Hartmannulidae(100)	Hartmannulidae_X(100)	Hartmannulidae_X_sp.(100)
Otu0892	15	Eukaryota(100)	Opisthokonta(100)	Fungi(100)	Ascomycota(100)	Pezizomycotina(100)	Pezizomycotina_unclassified(100)	Pezizomycotina_unclassified(100)	Pezizomycotina_unclassified(100)
Otu0893	15	Eukaryota(100)	Opisthokonta(100)	Fungi(100)	Fungi_unclassified(100)	Fungi_unclassified(100)	Fungi_unclassified(100)	Fungi_unclassified(100)	Fungi_unclassified(100)
Otu0894	15	Eukaryota(100)	Opisthokonta(100)	Metazoa(100)	Craniata(100)	Craniata_X(100)	Craniata_X_unclassified(100)	Craniata_X_unclassified(100)	Craniata_X_unclassified(100)
Otu0895	15	Eukaryota(100)	Archaeplastida(100)	Archaeplastida_unclassified(100)	Archaeplastida_unclassified(100)	Archaeplastida_unclassified(100)	Archaeplastida_unclassified(100)	Archaeplastida_unclassified(100)	Archaeplastida_unclassified(100)
Otu0896	15	Eukaryota(100)	Eukaryota_unclassified(100)	Eukaryota_unclassified(100)	Eukaryota_unclassified(100)	Eukaryota_unclassified(100)	Eukaryota_unclassified(100)	Eukaryota_unclassified(100)	Eukaryota_unclassified(100)
Otu0897	15	Eukaryota(100)	Eukaryota_unclassified(100)	Eukaryota_unclassified(100)	Eukaryota_unclassified(100)	Eukaryota_unclassified(100)	Eukaryota_unclassified(100)	Eukaryota_unclassified(100)	Eukaryota_unclassified(100)
Otu0898	15	Eukaryota(100)	Opisthokonta(100)	Metazoa(100)	Mollusca(100)	Bivalvia(100)	Heteroconchia(100)	Heteroconchia_unclassified(100)	Heteroconchia_unclassified(100)
Otu0899	15	Eukaryota(100)	Opisthokonta(100)	Opisthokonta_unclassified(100)	Opisthokonta_unclassified(100)	Opisthokonta_unclassified(100)	Opisthokonta_unclassified(100)	Opisthokonta_unclassified(100)	Opisthokonta_unclassified(100)
Otu0900	15	Eukaryota(100)	Eukaryota_unclassified(100)	Eukaryota_unclassified(100)	Eukaryota_unclassified(100)	Eukaryota_unclassified(100)	Eukaryota_unclassified(100)	Eukaryota_unclassified(100)	Eukaryota_unclassified(100)
Otu0901	15	Eukaryota(100)	Opisthokonta(100)	Metazoa(100)	Acanthocephala(100)	Acanthocephala_X(100)	Acanthocephala_XX(100)	Acanthocephala_XX_unclassified(94)	Acanthocephala_XX_unclassified(94)
Otu0902	15	Eukaryota(100)	Eukaryota_unclassified(100)	Eukaryota_unclassified(100)	Eukaryota_unclassified(100)	Eukaryota_unclassified(100)	Eukaryota_unclassified(100)	Eukaryota_unclassified(100)	Eukaryota_unclassified(100)
Otu0903	15	Eukaryota(100)	Rhizaria(100)	Cercozoa(100)	Filosa-Thecofilosea(100)	Ebriida(100)	Botuliformidae(100)	Botuliforma(100)	Botuliforma_benthica(100)
Otu0904	15	Eukaryota(100)	Eukaryota_unclassified(100)	Eukaryota_unclassified(100)	Eukaryota_unclassified(100)	Eukaryota_unclassified(100)	Eukaryota_unclassified(100)	Eukaryota_unclassified(100)	Eukaryota_unclassified(100)
Otu0905	15	Eukaryota(100)	Eukaryota_unclassified(100)	Eukaryota_unclassified(100)	Eukaryota_unclassified(100)	Eukaryota_unclassified(100)	Eukaryota_unclassified(100)	Eukaryota_unclassified(100)	Eukaryota_unclassified(100)
Otu0906	15	Eukaryota(100)	Eukaryota_unclassified(100)	Eukaryota_unclassified(100)	Eukaryota_unclassified(100)	Eukaryota_unclassified(100)	Eukaryota_unclassified(100)	Eukaryota_unclassified(100)	Eukaryota_unclassified(100)
Otu0907	15	Eukaryota(100)	Eukaryota_unclassified(100)	Eukaryota_unclassified(100)	Eukaryota_unclassified(100)	Eukaryota_unclassified(100)	Eukaryota_unclassified(100)	Eukaryota_unclassified(100)	Eukaryota_unclassified(100)
Otu0908	15	Eukaryota(100)	Archaeplastida(100)	Chlorophyta(100)	Chloropicophyceae(94)	Chloropicales(94)	Chloropicaceae(94)	Chloroparvula(94)	Chloroparvula_pacifica(94)
Otu0909	15	Eukaryota(100)	Eukaryota_unclassified(100)	Eukaryota_unclassified(100)	Eukaryota_unclassified(100)	Eukaryota_unclassified(100)	Eukaryota_unclassified(100)	Eukaryota_unclassified(100)	Eukaryota_unclassified(100)
Otu0910	15	Eukaryota(100)	Eukaryota_unclassified(100)	Eukaryota_unclassified(100)	Eukaryota_unclassified(100)	Eukaryota_unclassified(100)	Eukaryota_unclassified(100)	Eukaryota_unclassified(100)	Eukaryota_unclassified(100)
Otu0911	15	Eukaryota(100)	Opisthokonta(100)	Opisthokonta_unclassified(100)	Opisthokonta_unclassified(100)	Opisthokonta_unclassified(100)	Opisthokonta_unclassified(100)	Opisthokonta_unclassified(100)	Opisthokonta_unclassified(100)
Otu0912	14	Eukaryota(100)	Alveolata(100)	Apicomplexa(100)	Coccidiomorphea(100)	Eimeriida(100)	Eimeriidae(100)	Eimeriidae_unclassified(100)	Eimeriidae_unclassified(100)
Otu0913	14	Eukaryota(100)	Opisthokonta(100)	Metazoa(100)	Platyhelminthes(100)	Cestoda(100)	Eucestoda(100)	Diphyllobothrium(100)	Diphyllobothrium_unclassified(100)
Otu0914	14	Eukaryota(100)	Opisthokonta(100)	Metazoa(100)	Arthropoda(100)	Crustacea(100)	Maxillopoda(100)	Oithona(100)	Oithona_unclassified(100)
Otu0915	14	Eukaryota(100)	Stramenopiles(100)	Sagenista(100)	Labyrinthulomycetes(100)	Thraustochytriales(100)	Thraustochytriaceae(100)	Labyrinthuloides(100)	Labyrinthuloides_haliotidis(100)
Otu0916	14	Eukaryota(100)	Eukaryota_unclassified(100)	Eukaryota_unclassified(100)	Eukaryota_unclassified(100)	Eukaryota_unclassified(100)	Eukaryota_unclassified(100)	Eukaryota_unclassified(100)	Eukaryota_unclassified(100)
Otu0917	14	Eukaryota(100)	Opisthokonta(100)	Metazoa(100)	Nematoda(100)	Chromadorea(100)	Chromadorea_X(100)	Strongyloides(100)	Strongyloides_unclassified(93)
Otu0918	14	Eukaryota(100)	Archaeplastida(100)	Archaeplastida_unclassified(100)	Archaeplastida_unclassified(100)	Archaeplastida_unclassified(100)	Archaeplastida_unclassified(100)	Archaeplastida_unclassified(100)	Archaeplastida_unclassified(100)
Otu0919	14	Eukaryota(100)	Eukaryota_unclassified(100)	Eukaryota_unclassified(100)	Eukaryota_unclassified(100)	Eukaryota_unclassified(100)	Eukaryota_unclassified(100)	Eukaryota_unclassified(100)	Eukaryota_unclassified(100)
Otu0920	14	Eukaryota(100)	Opisthokonta(100)	Fungi(100)	Basidiomycota(100)	Agaricomycotina(100)	Agaricomycetes(100)	Tulasnella(100)	Tulasnella_asymmetrica(100)
Otu0921	14	Eukaryota(100)	Stramenopiles(100)	Ochrophyta(100)	Bacillariophyta(100)	Bacillariophyta_X(100)	Polar-centric-Mediophyceae(100)	Chaetoceros(100)	Chaetoceros_constrictus(100)
Otu0922	14	Eukaryota(100)	Eukaryota_unclassified(100)	Eukaryota_unclassified(100)	Eukaryota_unclassified(100)	Eukaryota_unclassified(100)	Eukaryota_unclassified(100)	Eukaryota_unclassified(100)	Eukaryota_unclassified(100)
Otu0923	14	Eukaryota(100)	Eukaryota_unclassified(100)	Eukaryota_unclassified(100)	Eukaryota_unclassified(100)	Eukaryota_unclassified(100)	Eukaryota_unclassified(100)	Eukaryota_unclassified(100)	Eukaryota_unclassified(100)
Otu0924	14	Eukaryota(100)	Opisthokonta(100)	Metazoa(100)	Mollusca(100)	Bivalvia(100)	Carditoida(100)	Astarte(100)	Astarte_sulcata(100)
Otu0925	14	Eukaryota(100)	Eukaryota_unclassified(100)	Eukaryota_unclassified(100)	Eukaryota_unclassified(100)	Eukaryota_unclassified(100)	Eukaryota_unclassified(100)	Eukaryota_unclassified(100)	Eukaryota_unclassified(100)
Otu0926	14	Eukaryota(100)	Eukaryota_unclassified(100)	Eukaryota_unclassified(100)	Eukaryota_unclassified(100)	Eukaryota_unclassified(100)	Eukaryota_unclassified(100)	Eukaryota_unclassified(100)	Eukaryota_unclassified(100)
Otu0927	14	Eukaryota(100)	Eukaryota_unclassified(100)	Eukaryota_unclassified(100)	Eukaryota_unclassified(100)	Eukaryota_unclassified(100)	Eukaryota_unclassified(100)	Eukaryota_unclassified(100)	Eukaryota_unclassified(100)
Otu0928	14	Eukaryota(100)	Stramenopiles(93)	Stramenopiles_unclassified(93)	Stramenopiles_unclassified(93)	Stramenopiles_unclassified(93)	Stramenopiles_unclassified(93)	Stramenopiles_unclassified(93)	Stramenopiles_unclassified(93)
Otu0929	14	Eukaryota(100)	Eukaryota_unclassified(100)	Eukaryota_unclassified(100)	Eukaryota_unclassified(100)	Eukaryota_unclassified(100)	Eukaryota_unclassified(100)	Eukaryota_unclassified(100)	Eukaryota_unclassified(100)
Otu0930	14	Eukaryota(100)	Archaeplastida(100)	Chlorophyta(100)	Pyramimonadales(100)	Pyramimonadales_X(100)	Pyramimonadales_XX(100)	Pyramimonas(100)	Pyramimonas_disomata(93)
Otu0931	14	Eukaryota(100)	Eukaryota_unclassified(100)	Eukaryota_unclassified(100)	Eukaryota_unclassified(100)	Eukaryota_unclassified(100)	Eukaryota_unclassified(100)	Eukaryota_unclassified(100)	Eukaryota_unclassified(100)
Otu0932	14	Eukaryota(100)	Eukaryota_unclassified(100)	Eukaryota_unclassified(100)	Eukaryota_unclassified(100)	Eukaryota_unclassified(100)	Eukaryota_unclassified(100)	Eukaryota_unclassified(100)	Eukaryota_unclassified(100)
Otu0933	14	Eukaryota(100)	Opisthokonta(100)	Fungi(100)	Basidiomycota(100)	Agaricomycotina(100)	Tremellomycetes(100)	Trichosporon(100)	Trichosporon_gracile(100)
Otu0934	14	Eukaryota(100)	Stramenopiles(100)	Opalozoa(100)	MAST-12(100)	MAST-12E(100)	MAST-12E_X(100)	MAST-12E_XX(100)	MAST-12E_XX_sp.(100)
Otu0935	14	Eukaryota(100)	Eukaryota_unclassified(100)	Eukaryota_unclassified(100)	Eukaryota_unclassified(100)	Eukaryota_unclassified(100)	Eukaryota_unclassified(100)	Eukaryota_unclassified(100)	Eukaryota_unclassified(100)
Otu0936	14	Eukaryota(100)	Opisthokonta(100)	Metazoa(100)	Platyhelminthes(100)	Trematoda(100)	Digenea(100)	Digenea_unclassified(100)	Digenea_unclassified(100)
Otu0937	14	Eukaryota(100)	Eukaryota_unclassified(100)	Eukaryota_unclassified(100)	Eukaryota_unclassified(100)	Eukaryota_unclassified(100)	Eukaryota_unclassified(100)	Eukaryota_unclassified(100)	Eukaryota_unclassified(100)
Otu0938	14	Eukaryota(100)	Opisthokonta(100)	Metazoa(100)	Platyhelminthes(100)	Cestoda(100)	Eucestoda(100)	Diphyllobothrium(93)	Diphyllobothrium_unclassified(86)
Otu0939	14	Eukaryota(100)	Eukaryota_unclassified(100)	Eukaryota_unclassified(100)	Eukaryota_unclassified(100)	Eukaryota_unclassified(100)	Eukaryota_unclassified(100)	Eukaryota_unclassified(100)	Eukaryota_unclassified(100)
Otu0940	14	Eukaryota(100)	Opisthokonta(100)	Fungi(100)	Basidiomycota(100)	Agaricomycotina(100)	Agaricomycetes(100)	Bjerkandera(100)	Bjerkandera_adusta(100)
Otu0941	14	Eukaryota(100)	Opisthokonta(100)	Metazoa(100)	Platyhelminthes(100)	Trematoda(100)	Digenea(100)	Digenea_unclassified(100)	Digenea_unclassified(100)
Otu0942	14	Eukaryota(100)	Eukaryota_unclassified(100)	Eukaryota_unclassified(100)	Eukaryota_unclassified(100)	Eukaryota_unclassified(100)	Eukaryota_unclassified(100)	Eukaryota_unclassified(100)	Eukaryota_unclassified(100)
Otu0943	13	Eukaryota(100)	Eukaryota_unclassified(100)	Eukaryota_unclassified(100)	Eukaryota_unclassified(100)	Eukaryota_unclassified(100)	Eukaryota_unclassified(100)	Eukaryota_unclassified(100)	Eukaryota_unclassified(100)
Otu0944	13	Eukaryota(100)	Archaeplastida(100)	Chlorophyta(85)	Pyramimonadales(85)	Pyramimonadales_X(85)	Pyramimonadales_XX(85)	Pyramimonadales_XX_unclassified(85)	Pyramimonadales_XX_unclassified(85)
Otu0945	13	Eukaryota(100)	Archaeplastida(100)	Streptophyta(100)	Embryophyceae(100)	Embryophyceae_X(100)	Embryophyceae_XX(100)	Allium(100)	Allium_unclassified(100)
Otu0946	13	Eukaryota(100)	Eukaryota_unclassified(100)	Eukaryota_unclassified(100)	Eukaryota_unclassified(100)	Eukaryota_unclassified(100)	Eukaryota_unclassified(100)	Eukaryota_unclassified(100)	Eukaryota_unclassified(100)
Otu0947	13	Eukaryota(100)	Opisthokonta(100)	Metazoa(100)	Platyhelminthes(100)	Trematoda(100)	Digenea(100)	Digenea_unclassified(100)	Digenea_unclassified(100)
Otu0948	13	Eukaryota(100)	Eukaryota_unclassified(100)	Eukaryota_unclassified(100)	Eukaryota_unclassified(100)	Eukaryota_unclassified(100)	Eukaryota_unclassified(100)	Eukaryota_unclassified(100)	Eukaryota_unclassified(100)
Otu0949	13	Eukaryota(100)	Rhizaria(100)	Cercozoa(100)	Filosa-Thecofilosea(100)	Ebriida(100)	Ebriida_unclassified(100)	Ebriida_unclassified(100)	Ebriida_unclassified(100)
Otu0950	13	Eukaryota(100)	Alveolata(100)	Dinoflagellata(100)	Dinophyceae(100)	Dinophyceae_unclassified(100)	Dinophyceae_unclassified(100)	Dinophyceae_unclassified(100)	Dinophyceae_unclassified(100)
Otu0951	13	Eukaryota(100)	Stramenopiles(100)	Pseudofungi(100)	Oomycota(100)	Oomycota_X(100)	Oomycota_X_unclassified(100)	Oomycota_X_unclassified(100)	Oomycota_X_unclassified(100)
Otu0952	13	Eukaryota(100)	Opisthokonta(100)	Metazoa(100)	Acanthocephala(100)	Acanthocephala_X(100)	Acanthocephala_XX(100)	Acanthocephala_XX_unclassified(100)	Acanthocephala_XX_unclassified(100)
Otu0953	13	Eukaryota(100)	Eukaryota_unclassified(100)	Eukaryota_unclassified(100)	Eukaryota_unclassified(100)	Eukaryota_unclassified(100)	Eukaryota_unclassified(100)	Eukaryota_unclassified(100)	Eukaryota_unclassified(100)
Otu0954	13	Eukaryota(100)	Archaeplastida(100)	Archaeplastida_unclassified(100)	Archaeplastida_unclassified(100)	Archaeplastida_unclassified(100)	Archaeplastida_unclassified(100)	Archaeplastida_unclassified(100)	Archaeplastida_unclassified(100)
Otu0955	13	Eukaryota(100)	Opisthokonta(100)	Metazoa(100)	Craniata(100)	Craniata_X(100)	Craniata_X_unclassified(100)	Craniata_X_unclassified(100)	Craniata_X_unclassified(100)
Otu0956	13	Eukaryota(100)	Alveolata(100)	Dinoflagellata(100)	Dinophyceae(100)	Dinophyceae_unclassified(100)	Dinophyceae_unclassified(100)	Dinophyceae_unclassified(100)	Dinophyceae_unclassified(100)
Otu0957	13	Eukaryota(100)	Eukaryota_unclassified(100)	Eukaryota_unclassified(100)	Eukaryota_unclassified(100)	Eukaryota_unclassified(100)	Eukaryota_unclassified(100)	Eukaryota_unclassified(100)	Eukaryota_unclassified(100)
Otu0958	13	Eukaryota(100)	Eukaryota_unclassified(100)	Eukaryota_unclassified(100)	Eukaryota_unclassified(100)	Eukaryota_unclassified(100)	Eukaryota_unclassified(100)	Eukaryota_unclassified(100)	Eukaryota_unclassified(100)
Otu0959	13	Eukaryota(100)	Alveolata(100)	Dinoflagellata(100)	Dinophyceae(100)	Gonyaulacales(100)	Goniodomataceae(100)	Alexandrium(93)	Alexandrium_unclassified(93)
Otu0960	13	Eukaryota(100)	Eukaryota_unclassified(100)	Eukaryota_unclassified(100)	Eukaryota_unclassified(100)	Eukaryota_unclassified(100)	Eukaryota_unclassified(100)	Eukaryota_unclassified(100)	Eukaryota_unclassified(100)
Otu0961	13	Eukaryota(100)	Eukaryota_unclassified(100)	Eukaryota_unclassified(100)	Eukaryota_unclassified(100)	Eukaryota_unclassified(100)	Eukaryota_unclassified(100)	Eukaryota_unclassified(100)	Eukaryota_unclassified(100)
Otu0962	13	Eukaryota(100)	Alveolata(100)	Apicomplexa(77)	Gregarinomorphea(77)	Gregarines_GRE6(77)	Gregarines_GRE6_X(77)	Gregarines_GRE6_XX(77)	Gregarines_GRE6_XX_sp.(77)
Otu0963	13	Eukaryota(100)	Opisthokonta(100)	Metazoa(100)	Nematoda(100)	Chromadorea(100)	Chromadorea_X(100)	Strongyloides(100)	Strongyloides_unclassified(100)
Otu0964	13	Eukaryota(100)	Eukaryota_unclassified(100)	Eukaryota_unclassified(100)	Eukaryota_unclassified(100)	Eukaryota_unclassified(100)	Eukaryota_unclassified(100)	Eukaryota_unclassified(100)	Eukaryota_unclassified(100)
Otu0965	13	Eukaryota(100)	Eukaryota_unclassified(100)	Eukaryota_unclassified(100)	Eukaryota_unclassified(100)	Eukaryota_unclassified(100)	Eukaryota_unclassified(100)	Eukaryota_unclassified(100)	Eukaryota_unclassified(100)
Otu0966	13	Eukaryota(100)	Alveolata(100)	Dinoflagellata(100)	Dinophyceae(100)	Dinophyceae_unclassified(100)	Dinophyceae_unclassified(100)	Dinophyceae_unclassified(100)	Dinophyceae_unclassified(100)
Otu0967	13	Eukaryota(100)	Eukaryota_unclassified(100)	Eukaryota_unclassified(100)	Eukaryota_unclassified(100)	Eukaryota_unclassified(100)	Eukaryota_unclassified(100)	Eukaryota_unclassified(100)	Eukaryota_unclassified(100)
Otu0968	13	Eukaryota(100)	Opisthokonta(100)	Metazoa(100)	Acanthocephala(100)	Acanthocephala_X(100)	Acanthocephala_XX(100)	Acanthocephala_XX_unclassified(85)	Acanthocephala_XX_unclassified(85)
Otu0969	13	Eukaryota(100)	Eukaryota_unclassified(70)	Eukaryota_unclassified(70)	Eukaryota_unclassified(70)	Eukaryota_unclassified(70)	Eukaryota_unclassified(70)	Eukaryota_unclassified(70)	Eukaryota_unclassified(70)
Otu0970	13	Eukaryota(100)	Eukaryota_unclassified(100)	Eukaryota_unclassified(100)	Eukaryota_unclassified(100)	Eukaryota_unclassified(100)	Eukaryota_unclassified(100)	Eukaryota_unclassified(100)	Eukaryota_unclassified(100)
Otu0971	13	Eukaryota(100)	Eukaryota_unclassified(100)	Eukaryota_unclassified(100)	Eukaryota_unclassified(100)	Eukaryota_unclassified(100)	Eukaryota_unclassified(100)	Eukaryota_unclassified(100)	Eukaryota_unclassified(100)
Otu0972	13	Eukaryota(100)	Opisthokonta(100)	Metazoa(100)	Rotifera(100)	Rotifera_X(100)	Rotifera_XX(100)	Rotifera_XX_unclassified(100)	Rotifera_XX_unclassified(100)
Otu0973	13	Eukaryota(100)	Eukaryota_unclassified(100)	Eukaryota_unclassified(100)	Eukaryota_unclassified(100)	Eukaryota_unclassified(100)	Eukaryota_unclassified(100)	Eukaryota_unclassified(100)	Eukaryota_unclassified(100)
Otu0974	13	Eukaryota(100)	Eukaryota_unclassified(100)	Eukaryota_unclassified(100)	Eukaryota_unclassified(100)	Eukaryota_unclassified(100)	Eukaryota_unclassified(100)	Eukaryota_unclassified(100)	Eukaryota_unclassified(100)
Otu0975	13	Eukaryota(100)	Eukaryota_unclassified(100)	Eukaryota_unclassified(100)	Eukaryota_unclassified(100)	Eukaryota_unclassified(100)	Eukaryota_unclassified(100)	Eukaryota_unclassified(100)	Eukaryota_unclassified(100)
Otu0976	13	Eukaryota(100)	Stramenopiles(100)	Ochrophyta(100)	Bacillariophyta(100)	Bacillariophyta_X(100)	Polar-centric-Mediophyceae(100)	Chaetoceros(100)	Chaetoceros_lauderi(100)
Otu0977	13	Eukaryota(100)	Eukaryota_unclassified(100)	Eukaryota_unclassified(100)	Eukaryota_unclassified(100)	Eukaryota_unclassified(100)	Eukaryota_unclassified(100)	Eukaryota_unclassified(100)	Eukaryota_unclassified(100)
Otu0978	13	Eukaryota(100)	Eukaryota_unclassified(100)	Eukaryota_unclassified(100)	Eukaryota_unclassified(100)	Eukaryota_unclassified(100)	Eukaryota_unclassified(100)	Eukaryota_unclassified(100)	Eukaryota_unclassified(100)
Otu0979	13	Eukaryota(100)	Opisthokonta(100)	Metazoa(100)	Craniata(100)	Craniata_X(100)	Craniata_X_unclassified(100)	Craniata_X_unclassified(100)	Craniata_X_unclassified(100)
Otu0980	13	Eukaryota(100)	Alveolata(100)	Dinoflagellata(100)	Dinophyceae(100)	Gonyaulacales(100)	Goniodomataceae(100)	Alexandrium(100)	Alexandrium_fundyense(70)
Otu0981	12	Eukaryota(100)	Opisthokonta(100)	Metazoa(100)	Mollusca(100)	Gastropoda(100)	Nudibranchia(100)	Nudibranchia_unclassified(100)	Nudibranchia_unclassified(100)
Otu0982	12	Eukaryota(100)	Eukaryota_unclassified(100)	Eukaryota_unclassified(100)	Eukaryota_unclassified(100)	Eukaryota_unclassified(100)	Eukaryota_unclassified(100)	Eukaryota_unclassified(100)	Eukaryota_unclassified(100)
Otu0983	12	Eukaryota(100)	Eukaryota_unclassified(100)	Eukaryota_unclassified(100)	Eukaryota_unclassified(100)	Eukaryota_unclassified(100)	Eukaryota_unclassified(100)	Eukaryota_unclassified(100)	Eukaryota_unclassified(100)
Otu0984	12	Eukaryota(100)	Eukaryota_unclassified(84)	Eukaryota_unclassified(84)	Eukaryota_unclassified(84)	Eukaryota_unclassified(84)	Eukaryota_unclassified(84)	Eukaryota_unclassified(84)	Eukaryota_unclassified(84)
Otu0985	12	Eukaryota(100)	Eukaryota_unclassified(100)	Eukaryota_unclassified(100)	Eukaryota_unclassified(100)	Eukaryota_unclassified(100)	Eukaryota_unclassified(100)	Eukaryota_unclassified(100)	Eukaryota_unclassified(100)
Otu0986	12	Eukaryota(100)	Archaeplastida(100)	Chlorophyta(100)	Trebouxiophyceae(100)	Microthamniales(100)	Microthamniales_X(100)	Trebouxia(100)	Trebouxia_unclassified(100)
Otu0987	12	Eukaryota(100)	Opisthokonta(100)	Metazoa(100)	Platyhelminthes(100)	Trematoda(100)	Digenea(100)	Digenea_unclassified(100)	Digenea_unclassified(100)
Otu0988	12	Eukaryota(100)	Stramenopiles(100)	Stramenopiles_unclassified(100)	Stramenopiles_unclassified(100)	Stramenopiles_unclassified(100)	Stramenopiles_unclassified(100)	Stramenopiles_unclassified(100)	Stramenopiles_unclassified(100)
Otu0989	12	Eukaryota(100)	Opisthokonta(100)	Metazoa(100)	Platyhelminthes(100)	Trematoda(100)	Digenea(100)	Stephanostomum(100)	Stephanostomum_unclassified(100)
Otu0990	12	Eukaryota(100)	Stramenopiles(100)	Ochrophyta(100)	Dictyochophyceae(100)	Dictyochophyceae_X(100)	Pedinellales(100)	Pedinellales_unclassified(100)	Pedinellales_unclassified(100)
Otu0991	12	Eukaryota(100)	Rhizaria(100)	Cercozoa(100)	Filosa-Thecofilosea(100)	Filosa-Thecofilosea_X(100)	Mataza-lineage(100)	Mataza(100)	Mataza_hastifera(100)
Otu0992	12	Eukaryota(100)	Alveolata(100)	Dinoflagellata(100)	Dinophyceae(100)	Gymnodiniales(92)	Gymnodiniales_unclassified(92)	Gymnodiniales_unclassified(92)	Gymnodiniales_unclassified(92)
Otu0993	12	Eukaryota(100)	Eukaryota_unclassified(100)	Eukaryota_unclassified(100)	Eukaryota_unclassified(100)	Eukaryota_unclassified(100)	Eukaryota_unclassified(100)	Eukaryota_unclassified(100)	Eukaryota_unclassified(100)
Otu0994	12	Eukaryota(100)	Eukaryota_unclassified(100)	Eukaryota_unclassified(100)	Eukaryota_unclassified(100)	Eukaryota_unclassified(100)	Eukaryota_unclassified(100)	Eukaryota_unclassified(100)	Eukaryota_unclassified(100)
Otu0995	12	Eukaryota(100)	Opisthokonta(100)	Metazoa(100)	Arthropoda(100)	Crustacea(100)	Maxillopoda(100)	Maxillopoda_unclassified(100)	Maxillopoda_unclassified(100)
Otu0996	12	Eukaryota(100)	Eukaryota_unclassified(100)	Eukaryota_unclassified(100)	Eukaryota_unclassified(100)	Eukaryota_unclassified(100)	Eukaryota_unclassified(100)	Eukaryota_unclassified(100)	Eukaryota_unclassified(100)
Otu0997	12	Eukaryota(100)	Stramenopiles(100)	Sagenista(100)	Labyrinthulomycetes(100)	Labyrinthulomycetes_unclassified(100)	Labyrinthulomycetes_unclassified(100)	Labyrinthulomycetes_unclassified(100)	Labyrinthulomycetes_unclassified(100)
Otu0998	12	Eukaryota(100)	Eukaryota_unclassified(92)	Eukaryota_unclassified(92)	Eukaryota_unclassified(92)	Eukaryota_unclassified(92)	Eukaryota_unclassified(92)	Eukaryota_unclassified(92)	Eukaryota_unclassified(92)
Otu0999	12	Eukaryota(100)	Stramenopiles(100)	Pseudofungi(100)	Oomycota(100)	Oomycota_X(100)	Oomycota_X_unclassified(100)	Oomycota_X_unclassified(100)	Oomycota_X_unclassified(100)
Otu1000	12	Eukaryota(100)	Eukaryota_unclassified(100)	Eukaryota_unclassified(100)	Eukaryota_unclassified(100)	Eukaryota_unclassified(100)	Eukaryota_unclassified(100)	Eukaryota_unclassified(100)	Eukaryota_unclassified(100)
Otu1001	12	Eukaryota(100)	Eukaryota_unclassified(100)	Eukaryota_unclassified(100)	Eukaryota_unclassified(100)	Eukaryota_unclassified(100)	Eukaryota_unclassified(100)	Eukaryota_unclassified(100)	Eukaryota_unclassified(100)
Otu1002	12	Eukaryota(100)	Eukaryota_unclassified(84)	Eukaryota_unclassified(84)	Eukaryota_unclassified(84)	Eukaryota_unclassified(84)	Eukaryota_unclassified(84)	Eukaryota_unclassified(84)	Eukaryota_unclassified(84)
Otu1003	12	Eukaryota(100)	Alveolata(100)	Dinoflagellata(100)	Dinophyceae(100)	Gonyaulacales(100)	Goniodomataceae(100)	Alexandrium(84)	Alexandrium_unclassified(59)
Otu1004	12	Eukaryota(100)	Rhizaria(100)	Cercozoa(100)	Endomyxa(100)	Vampyrellida(100)	Sey055-lineage(100)	Sey055-lineage_X(100)	Sey055-lineage_X_sp.(100)
Otu1005	12	Eukaryota(100)	Eukaryota_unclassified(100)	Eukaryota_unclassified(100)	Eukaryota_unclassified(100)	Eukaryota_unclassified(100)	Eukaryota_unclassified(100)	Eukaryota_unclassified(100)	Eukaryota_unclassified(100)
Otu1006	12	Eukaryota(100)	Opisthokonta(100)	Metazoa(100)	Platyhelminthes(100)	Trematoda(100)	Digenea(100)	Digenea_unclassified(100)	Digenea_unclassified(100)
Otu1007	12	Eukaryota(100)	Eukaryota_unclassified(100)	Eukaryota_unclassified(100)	Eukaryota_unclassified(100)	Eukaryota_unclassified(100)	Eukaryota_unclassified(100)	Eukaryota_unclassified(100)	Eukaryota_unclassified(100)
Otu1008	12	Eukaryota(100)	Opisthokonta(100)	Metazoa(100)	Nematoda(100)	Chromadorea(100)	Chromadorea_X(100)	Strongyloides(100)	Strongyloides_procyonis(100)
Otu1009	12	Eukaryota(100)	Eukaryota_unclassified(100)	Eukaryota_unclassified(100)	Eukaryota_unclassified(100)	Eukaryota_unclassified(100)	Eukaryota_unclassified(100)	Eukaryota_unclassified(100)	Eukaryota_unclassified(100)
Otu1010	12	Eukaryota(100)	Alveolata(100)	Dinoflagellata(100)	Dinophyceae(100)	Gonyaulacales(100)	Goniodomataceae(100)	Alexandrium(100)	Alexandrium_unclassified(100)
Otu1011	12	Eukaryota(100)	Eukaryota_unclassified(100)	Eukaryota_unclassified(100)	Eukaryota_unclassified(100)	Eukaryota_unclassified(100)	Eukaryota_unclassified(100)	Eukaryota_unclassified(100)	Eukaryota_unclassified(100)
Otu1012	12	Eukaryota(100)	Stramenopiles(100)	Sagenista(100)	Labyrinthulomycetes(100)	Labyrinthulomycetes_unclassified(100)	Labyrinthulomycetes_unclassified(100)	Labyrinthulomycetes_unclassified(100)	Labyrinthulomycetes_unclassified(100)
Otu1013	12	Eukaryota(100)	Eukaryota_unclassified(100)	Eukaryota_unclassified(100)	Eukaryota_unclassified(100)	Eukaryota_unclassified(100)	Eukaryota_unclassified(100)	Eukaryota_unclassified(100)	Eukaryota_unclassified(100)
Otu1014	12	Eukaryota(100)	Eukaryota_unclassified(100)	Eukaryota_unclassified(100)	Eukaryota_unclassified(100)	Eukaryota_unclassified(100)	Eukaryota_unclassified(100)	Eukaryota_unclassified(100)	Eukaryota_unclassified(100)
Otu1015	12	Eukaryota(100)	Alveolata(100)	Dinoflagellata(100)	Dinophyceae(100)	Dinophyceae_unclassified(100)	Dinophyceae_unclassified(100)	Dinophyceae_unclassified(100)	Dinophyceae_unclassified(100)
Otu1016	12	Eukaryota(100)	Opisthokonta(100)	Fungi(100)	Ascomycota(100)	Saccharomycotina(100)	Saccharomycetales(100)	Metschnikowia(100)	Metschnikowia_sp.(100)
Otu1017	12	Eukaryota(100)	Rhizaria(92)	Cercozoa(92)	Filosa-Thecofilosea(92)	Cryomonadida(92)	Cryothecomonas-lineage(92)	Cryothecomonas(92)	Cryothecomonas_aestivalis(92)
Otu1018	11	Eukaryota(100)	Eukaryota_unclassified(100)	Eukaryota_unclassified(100)	Eukaryota_unclassified(100)	Eukaryota_unclassified(100)	Eukaryota_unclassified(100)	Eukaryota_unclassified(100)	Eukaryota_unclassified(100)
Otu1019	11	Eukaryota(100)	Archaeplastida(55)	Archaeplastida_unclassified(55)	Archaeplastida_unclassified(55)	Archaeplastida_unclassified(55)	Archaeplastida_unclassified(55)	Archaeplastida_unclassified(55)	Archaeplastida_unclassified(55)
Otu1020	11	Eukaryota(100)	Opisthokonta(100)	Metazoa(100)	Platyhelminthes(100)	Cestoda(100)	Eucestoda(100)	Diphyllobothrium(100)	Diphyllobothrium_unclassified(100)
Otu1021	11	Eukaryota(100)	Eukaryota_unclassified(100)	Eukaryota_unclassified(100)	Eukaryota_unclassified(100)	Eukaryota_unclassified(100)	Eukaryota_unclassified(100)	Eukaryota_unclassified(100)	Eukaryota_unclassified(100)
Otu1022	11	Eukaryota(100)	Alveolata(100)	Dinoflagellata(100)	Dinophyceae(100)	Gonyaulacales(100)	Goniodomataceae(100)	Alexandrium(100)	Alexandrium_unclassified(73)
Otu1023	11	Eukaryota(100)	Opisthokonta(100)	Metazoa(100)	Nematoda(100)	Chromadorea(100)	Chromadorea_X(100)	Chromadorea_X_unclassified(100)	Chromadorea_X_unclassified(100)
Otu1024	11	Eukaryota(100)	Opisthokonta(100)	Metazoa(100)	Mollusca(100)	Gastropoda(100)	Nudibranchia(100)	Nudibranchia_unclassified(100)	Nudibranchia_unclassified(100)
Otu1025	11	Eukaryota(100)	Eukaryota_unclassified(100)	Eukaryota_unclassified(100)	Eukaryota_unclassified(100)	Eukaryota_unclassified(100)	Eukaryota_unclassified(100)	Eukaryota_unclassified(100)	Eukaryota_unclassified(100)
Otu1026	11	Eukaryota(100)	Eukaryota_unclassified(100)	Eukaryota_unclassified(100)	Eukaryota_unclassified(100)	Eukaryota_unclassified(100)	Eukaryota_unclassified(100)	Eukaryota_unclassified(100)	Eukaryota_unclassified(100)
Otu1027	11	Eukaryota(100)	Archaeplastida(73)	Archaeplastida_unclassified(73)	Archaeplastida_unclassified(73)	Archaeplastida_unclassified(73)	Archaeplastida_unclassified(73)	Archaeplastida_unclassified(73)	Archaeplastida_unclassified(73)
Otu1028	11	Eukaryota(100)	Eukaryota_unclassified(100)	Eukaryota_unclassified(100)	Eukaryota_unclassified(100)	Eukaryota_unclassified(100)	Eukaryota_unclassified(100)	Eukaryota_unclassified(100)	Eukaryota_unclassified(100)
Otu1029	11	Eukaryota(100)	Eukaryota_unclassified(100)	Eukaryota_unclassified(100)	Eukaryota_unclassified(100)	Eukaryota_unclassified(100)	Eukaryota_unclassified(100)	Eukaryota_unclassified(100)	Eukaryota_unclassified(100)
Otu1030	11	Eukaryota(100)	Eukaryota_unclassified(100)	Eukaryota_unclassified(100)	Eukaryota_unclassified(100)	Eukaryota_unclassified(100)	Eukaryota_unclassified(100)	Eukaryota_unclassified(100)	Eukaryota_unclassified(100)
Otu1031	11	Eukaryota(100)	Eukaryota_unclassified(100)	Eukaryota_unclassified(100)	Eukaryota_unclassified(100)	Eukaryota_unclassified(100)	Eukaryota_unclassified(100)	Eukaryota_unclassified(100)	Eukaryota_unclassified(100)
Otu1032	11	Eukaryota(100)	Eukaryota_unclassified(100)	Eukaryota_unclassified(100)	Eukaryota_unclassified(100)	Eukaryota_unclassified(100)	Eukaryota_unclassified(100)	Eukaryota_unclassified(100)	Eukaryota_unclassified(100)
Otu1033	11	Eukaryota(100)	Alveolata(100)	Dinoflagellata(100)	Dinophyceae(100)	Gonyaulacales(100)	Goniodomataceae(100)	Alexandrium(100)	Alexandrium_unclassified(100)
Otu1034	11	Eukaryota(100)	Eukaryota_unclassified(100)	Eukaryota_unclassified(100)	Eukaryota_unclassified(100)	Eukaryota_unclassified(100)	Eukaryota_unclassified(100)	Eukaryota_unclassified(100)	Eukaryota_unclassified(100)
Otu1035	11	Eukaryota(100)	Opisthokonta(100)	Fungi(100)	Basidiomycota(100)	Agaricomycotina(100)	Agaricomycetes(100)	Agaricomycetes_unclassified(100)	Agaricomycetes_unclassified(100)
Otu1036	11	Eukaryota(100)	Eukaryota_unclassified(100)	Eukaryota_unclassified(100)	Eukaryota_unclassified(100)	Eukaryota_unclassified(100)	Eukaryota_unclassified(100)	Eukaryota_unclassified(100)	Eukaryota_unclassified(100)
Otu1037	11	Eukaryota(100)	Eukaryota_unclassified(100)	Eukaryota_unclassified(100)	Eukaryota_unclassified(100)	Eukaryota_unclassified(100)	Eukaryota_unclassified(100)	Eukaryota_unclassified(100)	Eukaryota_unclassified(100)
Otu1038	11	Eukaryota(100)	Eukaryota_unclassified(100)	Eukaryota_unclassified(100)	Eukaryota_unclassified(100)	Eukaryota_unclassified(100)	Eukaryota_unclassified(100)	Eukaryota_unclassified(100)	Eukaryota_unclassified(100)
Otu1039	11	Eukaryota(100)	Archaeplastida(100)	Chlorophyta(73)	Pyramimonadales(73)	Pyramimonadales_X(73)	Pyramimonadales_XX(73)	Pyramimonadales_XX_unclassified(73)	Pyramimonadales_XX_unclassified(73)
Otu1040	11	Eukaryota(100)	Eukaryota_unclassified(100)	Eukaryota_unclassified(100)	Eukaryota_unclassified(100)	Eukaryota_unclassified(100)	Eukaryota_unclassified(100)	Eukaryota_unclassified(100)	Eukaryota_unclassified(100)
Otu1041	11	Eukaryota(100)	Eukaryota_unclassified(100)	Eukaryota_unclassified(100)	Eukaryota_unclassified(100)	Eukaryota_unclassified(100)	Eukaryota_unclassified(100)	Eukaryota_unclassified(100)	Eukaryota_unclassified(100)
Otu1042	11	Eukaryota(100)	Stramenopiles(100)	Ochrophyta(100)	Bacillariophyta(100)	Bacillariophyta_X(100)	Bacillariophyta_X_unclassified(100)	Bacillariophyta_X_unclassified(100)	Bacillariophyta_X_unclassified(100)
Otu1043	11	Eukaryota(100)	Rhizaria(91)	Cercozoa(91)	Filosa-Thecofilosea(91)	Cryomonadida(91)	Cryothecomonas-lineage(91)	Cryothecomonas(91)	Cryothecomonas_aestivalis(73)
Otu1044	11	Eukaryota(100)	Alveolata(100)	Dinoflagellata(100)	Syndiniales(100)	Dino-Group-IV(100)	Dino-Group-IV-Hematodinium-Group(100)	Hematodinium(100)	Hematodinium_unclassified(100)
Otu1045	11	Eukaryota(100)	Alveolata(100)	Dinoflagellata(100)	Dinophyceae(100)	Peridiniales(100)	Protoperidiniaceae(100)	Protoperidinium(100)	Protoperidinium_punctulatum(100)
Otu1046	11	Eukaryota(100)	Alveolata(100)	Dinoflagellata(100)	Dinophyceae(100)	Gonyaulacales(100)	Goniodomataceae(100)	Alexandrium(100)	Alexandrium_unclassified(100)
Otu1047	11	Eukaryota(100)	Eukaryota_unclassified(100)	Eukaryota_unclassified(100)	Eukaryota_unclassified(100)	Eukaryota_unclassified(100)	Eukaryota_unclassified(100)	Eukaryota_unclassified(100)	Eukaryota_unclassified(100)
Otu1048	11	Eukaryota(100)	Opisthokonta(100)	Metazoa(100)	Mollusca(100)	Gastropoda(100)	Nudibranchia(100)	Nudibranchia_unclassified(100)	Nudibranchia_unclassified(100)
Otu1049	11	Eukaryota(100)	Eukaryota_unclassified(100)	Eukaryota_unclassified(100)	Eukaryota_unclassified(100)	Eukaryota_unclassified(100)	Eukaryota_unclassified(100)	Eukaryota_unclassified(100)	Eukaryota_unclassified(100)
Otu1050	11	Eukaryota(100)	Eukaryota_unclassified(100)	Eukaryota_unclassified(100)	Eukaryota_unclassified(100)	Eukaryota_unclassified(100)	Eukaryota_unclassified(100)	Eukaryota_unclassified(100)	Eukaryota_unclassified(100)
Otu1051	11	Eukaryota(100)	Opisthokonta(100)	Metazoa(100)	Platyhelminthes(100)	Cestoda(100)	Eucestoda(100)	Eucestoda_unclassified(100)	Eucestoda_unclassified(100)
Otu1052	11	Eukaryota(100)	Alveolata(100)	Dinoflagellata(100)	Syndiniales(100)	Dino-Group-I(100)	Dino-Group-I-Clade-1(100)	Dino-Group-I-Clade-1_X(100)	Dino-Group-I-Clade-1_X_sp.(100)
Otu1053	11	Eukaryota(100)	Alveolata(100)	Alveolata_unclassified(100)	Alveolata_unclassified(100)	Alveolata_unclassified(100)	Alveolata_unclassified(100)	Alveolata_unclassified(100)	Alveolata_unclassified(100)
Otu1054	11	Eukaryota(100)	Eukaryota_unclassified(100)	Eukaryota_unclassified(100)	Eukaryota_unclassified(100)	Eukaryota_unclassified(100)	Eukaryota_unclassified(100)	Eukaryota_unclassified(100)	Eukaryota_unclassified(100)
Otu1055	10	Eukaryota(100)	Eukaryota_unclassified(100)	Eukaryota_unclassified(100)	Eukaryota_unclassified(100)	Eukaryota_unclassified(100)	Eukaryota_unclassified(100)	Eukaryota_unclassified(100)	Eukaryota_unclassified(100)
Otu1056	10	Eukaryota(100)	Alveolata(100)	Alveolata_unclassified(100)	Alveolata_unclassified(100)	Alveolata_unclassified(100)	Alveolata_unclassified(100)	Alveolata_unclassified(100)	Alveolata_unclassified(100)
Otu1057	10	Eukaryota(100)	Eukaryota_unclassified(100)	Eukaryota_unclassified(100)	Eukaryota_unclassified(100)	Eukaryota_unclassified(100)	Eukaryota_unclassified(100)	Eukaryota_unclassified(100)	Eukaryota_unclassified(100)
Otu1058	10	Eukaryota(100)	Eukaryota_unclassified(100)	Eukaryota_unclassified(100)	Eukaryota_unclassified(100)	Eukaryota_unclassified(100)	Eukaryota_unclassified(100)	Eukaryota_unclassified(100)	Eukaryota_unclassified(100)
Otu1059	10	Eukaryota(100)	Archaeplastida(100)	Rhodophyta(100)	Florideophyceae(100)	Colaconematales(100)	Colaconematales_X(100)	Colaconematales_XX(100)	Colaconematales_XX_sp.(100)
Otu1060	10	Eukaryota(100)	Eukaryota_unclassified(100)	Eukaryota_unclassified(100)	Eukaryota_unclassified(100)	Eukaryota_unclassified(100)	Eukaryota_unclassified(100)	Eukaryota_unclassified(100)	Eukaryota_unclassified(100)
Otu1061	10	Eukaryota(100)	Eukaryota_unclassified(100)	Eukaryota_unclassified(100)	Eukaryota_unclassified(100)	Eukaryota_unclassified(100)	Eukaryota_unclassified(100)	Eukaryota_unclassified(100)	Eukaryota_unclassified(100)
Otu1062	10	Eukaryota(100)	Eukaryota_unclassified(100)	Eukaryota_unclassified(100)	Eukaryota_unclassified(100)	Eukaryota_unclassified(100)	Eukaryota_unclassified(100)	Eukaryota_unclassified(100)	Eukaryota_unclassified(100)
Otu1063	10	Eukaryota(100)	Alveolata(100)	Dinoflagellata(100)	Dinophyceae(100)	Dinophyceae_unclassified(100)	Dinophyceae_unclassified(100)	Dinophyceae_unclassified(100)	Dinophyceae_unclassified(100)
Otu1064	10	Eukaryota(100)	Rhizaria(100)	Cercozoa(100)	Filosa-Thecofilosea(100)	Ventricleftida(100)	CCW10-lineage(100)	CCW10-lineage_X(100)	CCW10-lineage_X_sp.(100)
Otu1065	10	Eukaryota(100)	Alveolata(100)	Dinoflagellata(100)	Dinophyceae(100)	Gonyaulacales(100)	Goniodomataceae(100)	Alexandrium(100)	Alexandrium_unclassified(90)
Otu1066	10	Eukaryota(100)	Eukaryota_unclassified(100)	Eukaryota_unclassified(100)	Eukaryota_unclassified(100)	Eukaryota_unclassified(100)	Eukaryota_unclassified(100)	Eukaryota_unclassified(100)	Eukaryota_unclassified(100)
Otu1067	10	Eukaryota(100)	Rhizaria(100)	Cercozoa(100)	Endomyxa-Phytomyxea(100)	Plasmodiophorida(100)	Plasmodiophorida_X(100)	Spongospora(100)	Spongospora_unclassified(100)
Otu1068	10	Eukaryota(100)	Eukaryota_unclassified(100)	Eukaryota_unclassified(100)	Eukaryota_unclassified(100)	Eukaryota_unclassified(100)	Eukaryota_unclassified(100)	Eukaryota_unclassified(100)	Eukaryota_unclassified(100)
Otu1069	10	Eukaryota(100)	Archaeplastida(100)	Chlorophyta(100)	Pyramimonadales(100)	Pyramimonadales_X(100)	Pyramimonadales_XX(100)	Pyramimonas(100)	Pyramimonas_gelidicola(100)
Otu1070	10	Eukaryota(100)	Archaeplastida(61)	Archaeplastida_unclassified(61)	Archaeplastida_unclassified(61)	Archaeplastida_unclassified(61)	Archaeplastida_unclassified(61)	Archaeplastida_unclassified(61)	Archaeplastida_unclassified(61)
Otu1071	10	Eukaryota(100)	Eukaryota_unclassified(100)	Eukaryota_unclassified(100)	Eukaryota_unclassified(100)	Eukaryota_unclassified(100)	Eukaryota_unclassified(100)	Eukaryota_unclassified(100)	Eukaryota_unclassified(100)
Otu1072	10	Eukaryota(100)	Eukaryota_unclassified(100)	Eukaryota_unclassified(100)	Eukaryota_unclassified(100)	Eukaryota_unclassified(100)	Eukaryota_unclassified(100)	Eukaryota_unclassified(100)	Eukaryota_unclassified(100)
Otu1073	10	Eukaryota(100)	Stramenopiles(100)	Ochrophyta(100)	Dictyochophyceae(100)	Dictyochophyceae_X(100)	Pedinellales(100)	Pteridomonas(100)	Pteridomonas_danica(100)
Otu1074	10	Eukaryota(100)	Eukaryota_unclassified(100)	Eukaryota_unclassified(100)	Eukaryota_unclassified(100)	Eukaryota_unclassified(100)	Eukaryota_unclassified(100)	Eukaryota_unclassified(100)	Eukaryota_unclassified(100)
Otu1075	10	Eukaryota(100)	Eukaryota_unclassified(100)	Eukaryota_unclassified(100)	Eukaryota_unclassified(100)	Eukaryota_unclassified(100)	Eukaryota_unclassified(100)	Eukaryota_unclassified(100)	Eukaryota_unclassified(100)
Otu1076	10	Eukaryota(100)	Archaeplastida(100)	Archaeplastida_unclassified(100)	Archaeplastida_unclassified(100)	Archaeplastida_unclassified(100)	Archaeplastida_unclassified(100)	Archaeplastida_unclassified(100)	Archaeplastida_unclassified(100)
Otu1077	10	Eukaryota(100)	Rhizaria(100)	Cercozoa(100)	Filosa-Imbricatea(100)	Thaumatomonadida(100)	Thaumatomonadida_unclassified(100)	Thaumatomonadida_unclassified(100)	Thaumatomonadida_unclassified(100)
Otu1078	10	Eukaryota(100)	Archaeplastida(100)	Chlorophyta(100)	Chlorophyta_unclassified(100)	Chlorophyta_unclassified(100)	Chlorophyta_unclassified(100)	Chlorophyta_unclassified(100)	Chlorophyta_unclassified(100)
Otu1079	10	Eukaryota(100)	Alveolata(100)	Dinoflagellata(100)	Dinophyceae(100)	Gonyaulacales(100)	Goniodomataceae(100)	Alexandrium(100)	Alexandrium_unclassified(100)
Otu1080	10	Eukaryota(100)	Archaeplastida(90)	Archaeplastida_unclassified(90)	Archaeplastida_unclassified(90)	Archaeplastida_unclassified(90)	Archaeplastida_unclassified(90)	Archaeplastida_unclassified(90)	Archaeplastida_unclassified(90)
Otu1081	10	Eukaryota(100)	Eukaryota_unclassified(100)	Eukaryota_unclassified(100)	Eukaryota_unclassified(100)	Eukaryota_unclassified(100)	Eukaryota_unclassified(100)	Eukaryota_unclassified(100)	Eukaryota_unclassified(100)
Otu1082	10	Eukaryota(100)	Eukaryota_unclassified(100)	Eukaryota_unclassified(100)	Eukaryota_unclassified(100)	Eukaryota_unclassified(100)	Eukaryota_unclassified(100)	Eukaryota_unclassified(100)	Eukaryota_unclassified(100)
Otu1083	10	Eukaryota(100)	Alveolata(100)	Dinoflagellata(100)	Dinophyceae(100)	Dinophyceae_unclassified(100)	Dinophyceae_unclassified(100)	Dinophyceae_unclassified(100)	Dinophyceae_unclassified(100)
Otu1084	10	Eukaryota(100)	Eukaryota_unclassified(100)	Eukaryota_unclassified(100)	Eukaryota_unclassified(100)	Eukaryota_unclassified(100)	Eukaryota_unclassified(100)	Eukaryota_unclassified(100)	Eukaryota_unclassified(100)
Otu1085	10	Eukaryota(100)	Eukaryota_unclassified(100)	Eukaryota_unclassified(100)	Eukaryota_unclassified(100)	Eukaryota_unclassified(100)	Eukaryota_unclassified(100)	Eukaryota_unclassified(100)	Eukaryota_unclassified(100)
Otu1086	10	Eukaryota(100)	Stramenopiles(100)	Ochrophyta(100)	Chrysomerophyceae(100)	Chrysomerophyceae_X(100)	Chrysomerophyceae_XX(100)	Giraudyopsis(100)	Giraudyopsis_sp.(100)
Otu1087	10	Eukaryota(100)	Eukaryota_unclassified(100)	Eukaryota_unclassified(100)	Eukaryota_unclassified(100)	Eukaryota_unclassified(100)	Eukaryota_unclassified(100)	Eukaryota_unclassified(100)	Eukaryota_unclassified(100)
Otu1088	10	Eukaryota(100)	Eukaryota_unclassified(100)	Eukaryota_unclassified(100)	Eukaryota_unclassified(100)	Eukaryota_unclassified(100)	Eukaryota_unclassified(100)	Eukaryota_unclassified(100)	Eukaryota_unclassified(100)
Otu1089	10	Eukaryota(100)	Eukaryota_unclassified(100)	Eukaryota_unclassified(100)	Eukaryota_unclassified(100)	Eukaryota_unclassified(100)	Eukaryota_unclassified(100)	Eukaryota_unclassified(100)	Eukaryota_unclassified(100)
Otu1090	10	Eukaryota(100)	Eukaryota_unclassified(100)	Eukaryota_unclassified(100)	Eukaryota_unclassified(100)	Eukaryota_unclassified(100)	Eukaryota_unclassified(100)	Eukaryota_unclassified(100)	Eukaryota_unclassified(100)
Otu1091	10	Eukaryota(100)	Eukaryota_unclassified(100)	Eukaryota_unclassified(100)	Eukaryota_unclassified(100)	Eukaryota_unclassified(100)	Eukaryota_unclassified(100)	Eukaryota_unclassified(100)	Eukaryota_unclassified(100)
Otu1092	10	Eukaryota(100)	Opisthokonta(100)	Metazoa(100)	Metazoa_unclassified(100)	Metazoa_unclassified(100)	Metazoa_unclassified(100)	Metazoa_unclassified(100)	Metazoa_unclassified(100)
Otu1093	10	Eukaryota(100)	Eukaryota_unclassified(100)	Eukaryota_unclassified(100)	Eukaryota_unclassified(100)	Eukaryota_unclassified(100)	Eukaryota_unclassified(100)	Eukaryota_unclassified(100)	Eukaryota_unclassified(100)
Otu1094	10	Eukaryota(100)	Eukaryota_unclassified(100)	Eukaryota_unclassified(100)	Eukaryota_unclassified(100)	Eukaryota_unclassified(100)	Eukaryota_unclassified(100)	Eukaryota_unclassified(100)	Eukaryota_unclassified(100)
Otu1095	10	Eukaryota(100)	Eukaryota_unclassified(100)	Eukaryota_unclassified(100)	Eukaryota_unclassified(100)	Eukaryota_unclassified(100)	Eukaryota_unclassified(100)	Eukaryota_unclassified(100)	Eukaryota_unclassified(100)
Otu1096	10	Eukaryota(100)	Eukaryota_unclassified(100)	Eukaryota_unclassified(100)	Eukaryota_unclassified(100)	Eukaryota_unclassified(100)	Eukaryota_unclassified(100)	Eukaryota_unclassified(100)	Eukaryota_unclassified(100)
Otu1097	10	Eukaryota(100)	Eukaryota_unclassified(100)	Eukaryota_unclassified(100)	Eukaryota_unclassified(100)	Eukaryota_unclassified(100)	Eukaryota_unclassified(100)	Eukaryota_unclassified(100)	Eukaryota_unclassified(100)
Otu1098	10	Eukaryota(100)	Eukaryota_unclassified(100)	Eukaryota_unclassified(100)	Eukaryota_unclassified(100)	Eukaryota_unclassified(100)	Eukaryota_unclassified(100)	Eukaryota_unclassified(100)	Eukaryota_unclassified(100)
Otu1099	10	Eukaryota(100)	Opisthokonta(100)	Metazoa(100)	Arthropoda(100)	Crustacea(100)	Maxillopoda(100)	Maxillopoda_unclassified(100)	Maxillopoda_unclassified(100)
Otu1100	10	Eukaryota(100)	Opisthokonta(100)	Metazoa(100)	Cnidaria(100)	Cnidaria_X(100)	Anthozoa(100)	Anthozoa_unclassified(100)	Anthozoa_unclassified(100)
Otu1101	10	Eukaryota(100)	Opisthokonta(100)	Metazoa(100)	Platyhelminthes(100)	Trematoda(100)	Digenea(100)	Digenea_unclassified(100)	Digenea_unclassified(100)
Otu1102	10	Eukaryota(100)	Opisthokonta(100)	Metazoa(100)	Craniata(100)	Craniata_X(100)	Craniata_X_unclassified(61)	Craniata_X_unclassified(61)	Craniata_X_unclassified(61)
Otu1103	10	Eukaryota(100)	Opisthokonta(100)	Metazoa(100)	Acanthocephala(100)	Acanthocephala_X(100)	Acanthocephala_XX(100)	Corynosoma(100)	Corynosoma_unclassified(100)
Otu1104	10	Eukaryota(100)	Eukaryota_unclassified(100)	Eukaryota_unclassified(100)	Eukaryota_unclassified(100)	Eukaryota_unclassified(100)	Eukaryota_unclassified(100)	Eukaryota_unclassified(100)	Eukaryota_unclassified(100)
Otu1105	10	Eukaryota(100)	Alveolata(100)	Dinoflagellata(100)	Dinophyceae(100)	Gonyaulacales(100)	Goniodomataceae(100)	Alexandrium(100)	Alexandrium_unclassified(100)
Otu1106	10	Eukaryota(100)	Archaeplastida(100)	Chlorophyta(100)	Mamiellophyceae(100)	Dolichomastigales(100)	Crustomastigaceae(100)	Crustomastigaceae_unclassified(100)	Crustomastigaceae_unclassified(100)
Otu1107	10	Eukaryota(100)	Stramenopiles(100)	Ochrophyta(100)	Bacillariophyta(100)	Bacillariophyta_X(100)	Raphid-pennate(100)	Nitzschia(70)	Nitzschia_unclassified(70)
Otu1108	10	Eukaryota(100)	Opisthokonta(100)	Metazoa(100)	Platyhelminthes(100)	Trematoda(100)	Digenea(100)	Digenea_unclassified(100)	Digenea_unclassified(100)
Otu1109	10	Eukaryota(100)	Opisthokonta(100)	Metazoa(100)	Mollusca(100)	Bivalvia(100)	Heteroconchia(100)	Hiatella(100)	Hiatella_unclassified(100)
Otu1110	10	Eukaryota(100)	Opisthokonta(100)	Metazoa(100)	Platyhelminthes(100)	Platyhelminthes_unclassified(100)	Platyhelminthes_unclassified(100)	Platyhelminthes_unclassified(100)	Platyhelminthes_unclassified(100)
Otu1111	10	Eukaryota(100)	Opisthokonta(100)	Fungi(100)	Fungi_unclassified(100)	Fungi_unclassified(100)	Fungi_unclassified(100)	Fungi_unclassified(100)	Fungi_unclassified(100)
Otu1112	9	Eukaryota(100)	Opisthokonta(100)	Opisthokonta_unclassified(100)	Opisthokonta_unclassified(100)	Opisthokonta_unclassified(100)	Opisthokonta_unclassified(100)	Opisthokonta_unclassified(100)	Opisthokonta_unclassified(100)
Otu1113	9	Eukaryota(100)	Archaeplastida(100)	Chlorophyta(100)	Pyramimonadales(100)	Pyramimonadales_X(100)	Pyramimonadales_XX(100)	Pyramimonadales_XX_unclassified(67)	Pyramimonadales_XX_unclassified(67)
Otu1114	9	Eukaryota(100)	Alveolata(100)	Dinoflagellata(100)	Dinophyceae(100)	Gonyaulacales(100)	Goniodomataceae(100)	Alexandrium(100)	Alexandrium_unclassified(78)
Otu1115	9	Eukaryota(100)	Eukaryota_unclassified(100)	Eukaryota_unclassified(100)	Eukaryota_unclassified(100)	Eukaryota_unclassified(100)	Eukaryota_unclassified(100)	Eukaryota_unclassified(100)	Eukaryota_unclassified(100)
Otu1116	9	Eukaryota(100)	Opisthokonta(100)	Metazoa(100)	Craniata(100)	Craniata_X(100)	Teleostei(100)	Teleostei_unclassified(100)	Teleostei_unclassified(100)
Otu1117	9	Eukaryota(100)	Eukaryota_unclassified(100)	Eukaryota_unclassified(100)	Eukaryota_unclassified(100)	Eukaryota_unclassified(100)	Eukaryota_unclassified(100)	Eukaryota_unclassified(100)	Eukaryota_unclassified(100)
Otu1118	9	Eukaryota(100)	Eukaryota_unclassified(100)	Eukaryota_unclassified(100)	Eukaryota_unclassified(100)	Eukaryota_unclassified(100)	Eukaryota_unclassified(100)	Eukaryota_unclassified(100)	Eukaryota_unclassified(100)
Otu1119	9	Eukaryota(100)	Stramenopiles(100)	Ochrophyta(100)	Bacillariophyta(100)	Bacillariophyta_X(100)	Polar-centric-Mediophyceae(100)	Chaetoceros(100)	Chaetoceros_unclassified(100)
Otu1120	9	Eukaryota(100)	Eukaryota_unclassified(100)	Eukaryota_unclassified(100)	Eukaryota_unclassified(100)	Eukaryota_unclassified(100)	Eukaryota_unclassified(100)	Eukaryota_unclassified(100)	Eukaryota_unclassified(100)
Otu1121	9	Eukaryota(100)	Eukaryota_unclassified(100)	Eukaryota_unclassified(100)	Eukaryota_unclassified(100)	Eukaryota_unclassified(100)	Eukaryota_unclassified(100)	Eukaryota_unclassified(100)	Eukaryota_unclassified(100)
Otu1122	9	Eukaryota(100)	Opisthokonta(100)	Metazoa(100)	Mollusca(100)	Bivalvia(100)	Heteroconchia(100)	Macoma(100)	Macoma_nasuta(100)
Otu1123	9	Eukaryota(100)	Opisthokonta(100)	Metazoa(100)	Mollusca(100)	Gastropoda(100)	Nudibranchia(100)	Nudibranchia_unclassified(100)	Nudibranchia_unclassified(100)
Otu1124	9	Eukaryota(100)	Eukaryota_unclassified(100)	Eukaryota_unclassified(100)	Eukaryota_unclassified(100)	Eukaryota_unclassified(100)	Eukaryota_unclassified(100)	Eukaryota_unclassified(100)	Eukaryota_unclassified(100)
Otu1125	9	Eukaryota(100)	Opisthokonta(100)	Metazoa(100)	Nematoda(100)	Chromadorea(100)	Chromadorea_X(100)	Chromadorea_X_unclassified(100)	Chromadorea_X_unclassified(100)
Otu1126	9	Eukaryota(100)	Eukaryota_unclassified(100)	Eukaryota_unclassified(100)	Eukaryota_unclassified(100)	Eukaryota_unclassified(100)	Eukaryota_unclassified(100)	Eukaryota_unclassified(100)	Eukaryota_unclassified(100)
Otu1127	9	Eukaryota(100)	Stramenopiles(100)	Ochrophyta(100)	Dictyochophyceae(100)	Dictyochophyceae_X(100)	Pedinellales(100)	Pedinellales_X(100)	Pedinellales_X_sp.(100)
Otu1128	9	Eukaryota(100)	Alveolata(100)	Alveolata_unclassified(100)	Alveolata_unclassified(100)	Alveolata_unclassified(100)	Alveolata_unclassified(100)	Alveolata_unclassified(100)	Alveolata_unclassified(100)
Otu1129	9	Eukaryota(100)	Opisthokonta(100)	Fungi(89)	Fungi_unclassified(89)	Fungi_unclassified(89)	Fungi_unclassified(89)	Fungi_unclassified(89)	Fungi_unclassified(89)
Otu1130	9	Eukaryota(100)	Opisthokonta(100)	Metazoa(100)	Platyhelminthes(100)	Platyhelminthes_unclassified(100)	Platyhelminthes_unclassified(100)	Platyhelminthes_unclassified(100)	Platyhelminthes_unclassified(100)
Otu1131	9	Eukaryota(100)	Eukaryota_unclassified(100)	Eukaryota_unclassified(100)	Eukaryota_unclassified(100)	Eukaryota_unclassified(100)	Eukaryota_unclassified(100)	Eukaryota_unclassified(100)	Eukaryota_unclassified(100)
Otu1132	9	Eukaryota(100)	Eukaryota_unclassified(100)	Eukaryota_unclassified(100)	Eukaryota_unclassified(100)	Eukaryota_unclassified(100)	Eukaryota_unclassified(100)	Eukaryota_unclassified(100)	Eukaryota_unclassified(100)
Otu1133	9	Eukaryota(100)	Eukaryota_unclassified(100)	Eukaryota_unclassified(100)	Eukaryota_unclassified(100)	Eukaryota_unclassified(100)	Eukaryota_unclassified(100)	Eukaryota_unclassified(100)	Eukaryota_unclassified(100)
Otu1134	9	Eukaryota(100)	Alveolata(100)	Dinoflagellata(100)	Dinophyceae(100)	Gonyaulacales(100)	Goniodomataceae(100)	Alexandrium(100)	Alexandrium_unclassified(100)
Otu1135	9	Eukaryota(100)	Opisthokonta(100)	Fungi(100)	Fungi_unclassified(100)	Fungi_unclassified(100)	Fungi_unclassified(100)	Fungi_unclassified(100)	Fungi_unclassified(100)
Otu1136	9	Eukaryota(100)	Eukaryota_unclassified(100)	Eukaryota_unclassified(100)	Eukaryota_unclassified(100)	Eukaryota_unclassified(100)	Eukaryota_unclassified(100)	Eukaryota_unclassified(100)	Eukaryota_unclassified(100)
Otu1137	9	Eukaryota(100)	Stramenopiles(100)	Ochrophyta(100)	Bacillariophyta(100)	Bacillariophyta_X(100)	Polar-centric-Mediophyceae(100)	Chaetoceros(100)	Chaetoceros_unclassified(100)
Otu1138	9	Eukaryota(100)	Eukaryota_unclassified(100)	Eukaryota_unclassified(100)	Eukaryota_unclassified(100)	Eukaryota_unclassified(100)	Eukaryota_unclassified(100)	Eukaryota_unclassified(100)	Eukaryota_unclassified(100)
Otu1139	9	Eukaryota(100)	Archaeplastida(100)	Archaeplastida_unclassified(78)	Archaeplastida_unclassified(78)	Archaeplastida_unclassified(78)	Archaeplastida_unclassified(78)	Archaeplastida_unclassified(78)	Archaeplastida_unclassified(78)
Otu1140	9	Eukaryota(100)	Eukaryota_unclassified(100)	Eukaryota_unclassified(100)	Eukaryota_unclassified(100)	Eukaryota_unclassified(100)	Eukaryota_unclassified(100)	Eukaryota_unclassified(100)	Eukaryota_unclassified(100)
Otu1141	9	Eukaryota(100)	Eukaryota_unclassified(100)	Eukaryota_unclassified(100)	Eukaryota_unclassified(100)	Eukaryota_unclassified(100)	Eukaryota_unclassified(100)	Eukaryota_unclassified(100)	Eukaryota_unclassified(100)
Otu1142	9	Eukaryota(100)	Eukaryota_unclassified(89)	Eukaryota_unclassified(89)	Eukaryota_unclassified(89)	Eukaryota_unclassified(89)	Eukaryota_unclassified(89)	Eukaryota_unclassified(89)	Eukaryota_unclassified(89)
Otu1143	9	Eukaryota(100)	Alveolata(100)	Dinoflagellata(100)	Dinophyceae(100)	Gonyaulacales(100)	Goniodomataceae(100)	Alexandrium(89)	Alexandrium_unclassified(67)
Otu1144	9	Eukaryota(100)	Stramenopiles(89)	Ochrophyta(56)	Ochrophyta_unclassified(56)	Ochrophyta_unclassified(56)	Ochrophyta_unclassified(56)	Ochrophyta_unclassified(56)	Ochrophyta_unclassified(56)
Otu1145	9	Eukaryota(100)	Eukaryota_unclassified(100)	Eukaryota_unclassified(100)	Eukaryota_unclassified(100)	Eukaryota_unclassified(100)	Eukaryota_unclassified(100)	Eukaryota_unclassified(100)	Eukaryota_unclassified(100)
Otu1146	9	Eukaryota(100)	Eukaryota_unclassified(89)	Eukaryota_unclassified(89)	Eukaryota_unclassified(89)	Eukaryota_unclassified(89)	Eukaryota_unclassified(89)	Eukaryota_unclassified(89)	Eukaryota_unclassified(89)
Otu1147	9	Eukaryota(100)	Eukaryota_unclassified(100)	Eukaryota_unclassified(100)	Eukaryota_unclassified(100)	Eukaryota_unclassified(100)	Eukaryota_unclassified(100)	Eukaryota_unclassified(100)	Eukaryota_unclassified(100)
Otu1148	9	Eukaryota(100)	Alveolata(100)	Alveolata_unclassified(100)	Alveolata_unclassified(100)	Alveolata_unclassified(100)	Alveolata_unclassified(100)	Alveolata_unclassified(100)	Alveolata_unclassified(100)
Otu1149	9	Eukaryota(100)	Rhizaria(100)	Cercozoa(100)	Filosa-Imbricatea(100)	Filosa-Imbricatea_X(100)	Filosa-Imbricatea_XX(100)	Filosa-Imbricatea_XXX(100)	Filosa-Imbricatea_XXX_sp.(100)
Otu1150	9	Eukaryota(100)	Archaeplastida(100)	Chlorophyta(100)	Pyramimonadales(100)	Pyramimonadales_X(100)	Pyramimonadales_XX(100)	Pyramimonas(100)	Pyramimonas_unclassified(100)
Otu1151	9	Eukaryota(100)	Eukaryota_unclassified(100)	Eukaryota_unclassified(100)	Eukaryota_unclassified(100)	Eukaryota_unclassified(100)	Eukaryota_unclassified(100)	Eukaryota_unclassified(100)	Eukaryota_unclassified(100)
Otu1152	9	Eukaryota(100)	Alveolata(100)	Alveolata_unclassified(100)	Alveolata_unclassified(100)	Alveolata_unclassified(100)	Alveolata_unclassified(100)	Alveolata_unclassified(100)	Alveolata_unclassified(100)
Otu1153	9	Eukaryota(100)	Eukaryota_unclassified(100)	Eukaryota_unclassified(100)	Eukaryota_unclassified(100)	Eukaryota_unclassified(100)	Eukaryota_unclassified(100)	Eukaryota_unclassified(100)	Eukaryota_unclassified(100)
Otu1154	9	Eukaryota(100)	Eukaryota_unclassified(100)	Eukaryota_unclassified(100)	Eukaryota_unclassified(100)	Eukaryota_unclassified(100)	Eukaryota_unclassified(100)	Eukaryota_unclassified(100)	Eukaryota_unclassified(100)
Otu1155	9	Eukaryota(100)	Alveolata(100)	Dinoflagellata(100)	Dinophyceae(100)	Gonyaulacales(100)	Goniodomataceae(100)	Alexandrium(100)	Alexandrium_unclassified(100)
Otu1156	9	Eukaryota(100)	Eukaryota_unclassified(100)	Eukaryota_unclassified(100)	Eukaryota_unclassified(100)	Eukaryota_unclassified(100)	Eukaryota_unclassified(100)	Eukaryota_unclassified(100)	Eukaryota_unclassified(100)
Otu1157	9	Eukaryota(100)	Eukaryota_unclassified(100)	Eukaryota_unclassified(100)	Eukaryota_unclassified(100)	Eukaryota_unclassified(100)	Eukaryota_unclassified(100)	Eukaryota_unclassified(100)	Eukaryota_unclassified(100)
Otu1158	9	Eukaryota(100)	Eukaryota_unclassified(100)	Eukaryota_unclassified(100)	Eukaryota_unclassified(100)	Eukaryota_unclassified(100)	Eukaryota_unclassified(100)	Eukaryota_unclassified(100)	Eukaryota_unclassified(100)
Otu1159	9	Eukaryota(100)	Eukaryota_unclassified(100)	Eukaryota_unclassified(100)	Eukaryota_unclassified(100)	Eukaryota_unclassified(100)	Eukaryota_unclassified(100)	Eukaryota_unclassified(100)	Eukaryota_unclassified(100)
Otu1160	9	Eukaryota(100)	Alveolata(100)	Dinoflagellata(100)	Dinophyceae(100)	Gonyaulacales(100)	Goniodomataceae(100)	Alexandrium(100)	Alexandrium_unclassified(67)
Otu1161	9	Eukaryota(100)	Stramenopiles(100)	Stramenopiles_unclassified(100)	Stramenopiles_unclassified(100)	Stramenopiles_unclassified(100)	Stramenopiles_unclassified(100)	Stramenopiles_unclassified(100)	Stramenopiles_unclassified(100)
Otu1162	9	Eukaryota(100)	Opisthokonta(100)	Metazoa(100)	Arthropoda(100)	Chelicerata(100)	Arachnida(100)	Arachnida_unclassified(100)	Arachnida_unclassified(100)
Otu1163	9	Eukaryota(100)	Opisthokonta(100)	Metazoa(100)	Platyhelminthes(100)	Trematoda(100)	Digenea(100)	Digenea_unclassified(100)	Digenea_unclassified(100)
Otu1164	9	Eukaryota(100)	Opisthokonta(100)	Fungi(100)	Fungi_unclassified(100)	Fungi_unclassified(100)	Fungi_unclassified(100)	Fungi_unclassified(100)	Fungi_unclassified(100)
Otu1165	9	Eukaryota(100)	Eukaryota_unclassified(100)	Eukaryota_unclassified(100)	Eukaryota_unclassified(100)	Eukaryota_unclassified(100)	Eukaryota_unclassified(100)	Eukaryota_unclassified(100)	Eukaryota_unclassified(100)
Otu1166	9	Eukaryota(100)	Rhizaria(100)	Cercozoa(100)	Filosa-Thecofilosea(100)	Cryomonadida(100)	Cryomonadida_unclassified(89)	Cryomonadida_unclassified(89)	Cryomonadida_unclassified(89)
Otu1167	9	Eukaryota(100)	Eukaryota_unclassified(100)	Eukaryota_unclassified(100)	Eukaryota_unclassified(100)	Eukaryota_unclassified(100)	Eukaryota_unclassified(100)	Eukaryota_unclassified(100)	Eukaryota_unclassified(100)
Otu1168	9	Eukaryota(100)	Rhizaria(78)	Cercozoa(78)	Filosa-Thecofilosea(78)	Ebriida(78)	Ebriidae(67)	Ebria(67)	Ebria_tripartita(67)
Otu1169	9	Eukaryota(100)	Alveolata(100)	Dinoflagellata(100)	Dinophyceae(100)	Gonyaulacales(100)	Goniodomataceae(100)	Alexandrium(100)	Alexandrium_unclassified(100)
Otu1170	9	Eukaryota(100)	Eukaryota_unclassified(100)	Eukaryota_unclassified(100)	Eukaryota_unclassified(100)	Eukaryota_unclassified(100)	Eukaryota_unclassified(100)	Eukaryota_unclassified(100)	Eukaryota_unclassified(100)
Otu1171	9	Eukaryota(100)	Alveolata(100)	Dinoflagellata(100)	Dinophyceae(100)	Gonyaulacales(100)	Goniodomataceae(100)	Alexandrium(100)	Alexandrium_unclassified(100)
Otu1172	9	Eukaryota(100)	Eukaryota_unclassified(100)	Eukaryota_unclassified(100)	Eukaryota_unclassified(100)	Eukaryota_unclassified(100)	Eukaryota_unclassified(100)	Eukaryota_unclassified(100)	Eukaryota_unclassified(100)
Otu1173	9	Eukaryota(100)	Opisthokonta(100)	Metazoa(100)	Mollusca(100)	Gastropoda(100)	Nudibranchia(100)	Nudibranchia_unclassified(100)	Nudibranchia_unclassified(100)
Otu1174	9	Eukaryota(100)	Opisthokonta(100)	Metazoa(100)	Acanthocephala(100)	Acanthocephala_X(100)	Acanthocephala_XX(100)	Acanthocephala_XX_unclassified(89)	Acanthocephala_XX_unclassified(89)
Otu1175	8	Eukaryota(100)	Eukaryota_unclassified(100)	Eukaryota_unclassified(100)	Eukaryota_unclassified(100)	Eukaryota_unclassified(100)	Eukaryota_unclassified(100)	Eukaryota_unclassified(100)	Eukaryota_unclassified(100)
Otu1176	8	Eukaryota(100)	Eukaryota_unclassified(100)	Eukaryota_unclassified(100)	Eukaryota_unclassified(100)	Eukaryota_unclassified(100)	Eukaryota_unclassified(100)	Eukaryota_unclassified(100)	Eukaryota_unclassified(100)
Otu1177	8	Eukaryota(100)	Eukaryota_unclassified(100)	Eukaryota_unclassified(100)	Eukaryota_unclassified(100)	Eukaryota_unclassified(100)	Eukaryota_unclassified(100)	Eukaryota_unclassified(100)	Eukaryota_unclassified(100)
Otu1178	8	Eukaryota(100)	Eukaryota_unclassified(100)	Eukaryota_unclassified(100)	Eukaryota_unclassified(100)	Eukaryota_unclassified(100)	Eukaryota_unclassified(100)	Eukaryota_unclassified(100)	Eukaryota_unclassified(100)
Otu1179	8	Eukaryota(100)	Eukaryota_unclassified(100)	Eukaryota_unclassified(100)	Eukaryota_unclassified(100)	Eukaryota_unclassified(100)	Eukaryota_unclassified(100)	Eukaryota_unclassified(100)	Eukaryota_unclassified(100)
Otu1180	8	Eukaryota(100)	Eukaryota_unclassified(100)	Eukaryota_unclassified(100)	Eukaryota_unclassified(100)	Eukaryota_unclassified(100)	Eukaryota_unclassified(100)	Eukaryota_unclassified(100)	Eukaryota_unclassified(100)
Otu1181	8	Eukaryota(100)	Alveolata(100)	Dinoflagellata(100)	Dinophyceae(100)	Gonyaulacales(100)	Goniodomataceae(100)	Alexandrium(100)	Alexandrium_unclassified(88)
Otu1182	8	Eukaryota(100)	Opisthokonta(100)	Metazoa(100)	Mollusca(100)	Bivalvia(100)	Heteroconchia(100)	Heteroconchia_unclassified(100)	Heteroconchia_unclassified(100)
Otu1183	8	Eukaryota(100)	Stramenopiles(100)	Ochrophyta(100)	Dictyochophyceae(100)	Dictyochophyceae_X(100)	Pedinellales(100)	Pedinellales_unclassified(100)	Pedinellales_unclassified(100)
Otu1184	8	Eukaryota(100)	Eukaryota_unclassified(100)	Eukaryota_unclassified(100)	Eukaryota_unclassified(100)	Eukaryota_unclassified(100)	Eukaryota_unclassified(100)	Eukaryota_unclassified(100)	Eukaryota_unclassified(100)
Otu1185	8	Eukaryota(100)	Archaeplastida(75)	Archaeplastida_unclassified(63)	Archaeplastida_unclassified(63)	Archaeplastida_unclassified(63)	Archaeplastida_unclassified(63)	Archaeplastida_unclassified(63)	Archaeplastida_unclassified(63)
Otu1186	8	Eukaryota(100)	Stramenopiles(100)	Stramenopiles_unclassified(100)	Stramenopiles_unclassified(100)	Stramenopiles_unclassified(100)	Stramenopiles_unclassified(100)	Stramenopiles_unclassified(100)	Stramenopiles_unclassified(100)
Otu1187	8	Eukaryota(100)	Alveolata(100)	Dinoflagellata(100)	Dinophyceae(100)	Gonyaulacales(100)	Goniodomataceae(100)	Alexandrium(100)	Alexandrium_unclassified(100)
Otu1188	8	Eukaryota(100)	Eukaryota_unclassified(100)	Eukaryota_unclassified(100)	Eukaryota_unclassified(100)	Eukaryota_unclassified(100)	Eukaryota_unclassified(100)	Eukaryota_unclassified(100)	Eukaryota_unclassified(100)
Otu1189	8	Eukaryota(100)	Eukaryota_unclassified(100)	Eukaryota_unclassified(100)	Eukaryota_unclassified(100)	Eukaryota_unclassified(100)	Eukaryota_unclassified(100)	Eukaryota_unclassified(100)	Eukaryota_unclassified(100)
Otu1190	8	Eukaryota(100)	Eukaryota_unclassified(100)	Eukaryota_unclassified(100)	Eukaryota_unclassified(100)	Eukaryota_unclassified(100)	Eukaryota_unclassified(100)	Eukaryota_unclassified(100)	Eukaryota_unclassified(100)
Otu1191	8	Eukaryota(100)	Eukaryota_unclassified(100)	Eukaryota_unclassified(100)	Eukaryota_unclassified(100)	Eukaryota_unclassified(100)	Eukaryota_unclassified(100)	Eukaryota_unclassified(100)	Eukaryota_unclassified(100)
Otu1192	8	Eukaryota(100)	Eukaryota_unclassified(100)	Eukaryota_unclassified(100)	Eukaryota_unclassified(100)	Eukaryota_unclassified(100)	Eukaryota_unclassified(100)	Eukaryota_unclassified(100)	Eukaryota_unclassified(100)
Otu1193	8	Eukaryota(100)	Archaeplastida(100)	Chlorophyta(100)	Chlorophyceae(100)	Sphaeropleales(100)	Sphaeropleales_X(100)	Desmodesmus(63)	Desmodesmus_unclassified(63)
Otu1194	8	Eukaryota(100)	Eukaryota_unclassified(88)	Eukaryota_unclassified(88)	Eukaryota_unclassified(88)	Eukaryota_unclassified(88)	Eukaryota_unclassified(88)	Eukaryota_unclassified(88)	Eukaryota_unclassified(88)
Otu1195	8	Eukaryota(100)	Eukaryota_unclassified(100)	Eukaryota_unclassified(100)	Eukaryota_unclassified(100)	Eukaryota_unclassified(100)	Eukaryota_unclassified(100)	Eukaryota_unclassified(100)	Eukaryota_unclassified(100)
Otu1196	8	Eukaryota(100)	Archaeplastida(100)	Archaeplastida_unclassified(100)	Archaeplastida_unclassified(100)	Archaeplastida_unclassified(100)	Archaeplastida_unclassified(100)	Archaeplastida_unclassified(100)	Archaeplastida_unclassified(100)
Otu1197	8	Eukaryota(100)	Eukaryota_unclassified(100)	Eukaryota_unclassified(100)	Eukaryota_unclassified(100)	Eukaryota_unclassified(100)	Eukaryota_unclassified(100)	Eukaryota_unclassified(100)	Eukaryota_unclassified(100)
Otu1198	8	Eukaryota(100)	Stramenopiles(100)	Stramenopiles_unclassified(88)	Stramenopiles_unclassified(88)	Stramenopiles_unclassified(88)	Stramenopiles_unclassified(88)	Stramenopiles_unclassified(88)	Stramenopiles_unclassified(88)
Otu1199	8	Eukaryota(100)	Stramenopiles(100)	Stramenopiles_unclassified(100)	Stramenopiles_unclassified(100)	Stramenopiles_unclassified(100)	Stramenopiles_unclassified(100)	Stramenopiles_unclassified(100)	Stramenopiles_unclassified(100)
Otu1200	8	Eukaryota(100)	Eukaryota_unclassified(100)	Eukaryota_unclassified(100)	Eukaryota_unclassified(100)	Eukaryota_unclassified(100)	Eukaryota_unclassified(100)	Eukaryota_unclassified(100)	Eukaryota_unclassified(100)
Otu1201	8	Eukaryota(100)	Eukaryota_unclassified(100)	Eukaryota_unclassified(100)	Eukaryota_unclassified(100)	Eukaryota_unclassified(100)	Eukaryota_unclassified(100)	Eukaryota_unclassified(100)	Eukaryota_unclassified(100)
Otu1202	8	Eukaryota(100)	Eukaryota_unclassified(100)	Eukaryota_unclassified(100)	Eukaryota_unclassified(100)	Eukaryota_unclassified(100)	Eukaryota_unclassified(100)	Eukaryota_unclassified(100)	Eukaryota_unclassified(100)
Otu1203	8	Eukaryota(100)	Eukaryota_unclassified(100)	Eukaryota_unclassified(100)	Eukaryota_unclassified(100)	Eukaryota_unclassified(100)	Eukaryota_unclassified(100)	Eukaryota_unclassified(100)	Eukaryota_unclassified(100)
Otu1204	8	Eukaryota(100)	Alveolata(100)	Dinoflagellata(100)	Dinophyceae(100)	Gymnodiniales(100)	Gymnodiniales_unclassified(100)	Gymnodiniales_unclassified(100)	Gymnodiniales_unclassified(100)
Otu1205	8	Eukaryota(100)	Alveolata(100)	Dinoflagellata(100)	Dinophyceae(100)	Gonyaulacales(88)	Goniodomataceae(88)	Alexandrium(88)	Alexandrium_unclassified(88)
Otu1206	8	Eukaryota(100)	Eukaryota_unclassified(100)	Eukaryota_unclassified(100)	Eukaryota_unclassified(100)	Eukaryota_unclassified(100)	Eukaryota_unclassified(100)	Eukaryota_unclassified(100)	Eukaryota_unclassified(100)
Otu1207	8	Eukaryota(100)	Alveolata(100)	Dinoflagellata(100)	Dinophyceae(100)	Gonyaulacales(100)	Goniodomataceae(100)	Alexandrium(100)	Alexandrium_unclassified(100)
Otu1208	8	Eukaryota(100)	Rhizaria(100)	Cercozoa(100)	Chlorarachniophyceae(100)	Chlorarachnida(100)	Chlorarachnida_X(100)	Chlorarachnion(100)	Chlorarachnion_sp.(100)
Otu1209	8	Eukaryota(100)	Stramenopiles(100)	Ochrophyta(100)	Xanthophyceae(100)	Xanthophyceae_X(100)	Xanthophyceae_XX(100)	Xanthophyceae_XX_unclassified(100)	Xanthophyceae_XX_unclassified(100)
Otu1210	8	Eukaryota(100)	Eukaryota_unclassified(100)	Eukaryota_unclassified(100)	Eukaryota_unclassified(100)	Eukaryota_unclassified(100)	Eukaryota_unclassified(100)	Eukaryota_unclassified(100)	Eukaryota_unclassified(100)
Otu1211	8	Eukaryota(100)	Opisthokonta(100)	Opisthokonta_unclassified(100)	Opisthokonta_unclassified(100)	Opisthokonta_unclassified(100)	Opisthokonta_unclassified(100)	Opisthokonta_unclassified(100)	Opisthokonta_unclassified(100)
Otu1212	8	Eukaryota(100)	Rhizaria(88)	Cercozoa(88)	Cercozoa_unclassified(88)	Cercozoa_unclassified(88)	Cercozoa_unclassified(88)	Cercozoa_unclassified(88)	Cercozoa_unclassified(88)
Otu1213	8	Eukaryota(100)	Alveolata(100)	Dinoflagellata(100)	Dinophyceae(100)	Gonyaulacales(100)	Goniodomataceae(100)	Alexandrium(100)	Alexandrium_unclassified(100)
Otu1214	8	Eukaryota(100)	Eukaryota_unclassified(100)	Eukaryota_unclassified(100)	Eukaryota_unclassified(100)	Eukaryota_unclassified(100)	Eukaryota_unclassified(100)	Eukaryota_unclassified(100)	Eukaryota_unclassified(100)
Otu1215	8	Eukaryota(100)	Eukaryota_unclassified(100)	Eukaryota_unclassified(100)	Eukaryota_unclassified(100)	Eukaryota_unclassified(100)	Eukaryota_unclassified(100)	Eukaryota_unclassified(100)	Eukaryota_unclassified(100)
Otu1216	8	Eukaryota(100)	Eukaryota_unclassified(100)	Eukaryota_unclassified(100)	Eukaryota_unclassified(100)	Eukaryota_unclassified(100)	Eukaryota_unclassified(100)	Eukaryota_unclassified(100)	Eukaryota_unclassified(100)
Otu1217	8	Eukaryota(100)	Eukaryota_unclassified(100)	Eukaryota_unclassified(100)	Eukaryota_unclassified(100)	Eukaryota_unclassified(100)	Eukaryota_unclassified(100)	Eukaryota_unclassified(100)	Eukaryota_unclassified(100)
Otu1218	8	Eukaryota(100)	Eukaryota_unclassified(100)	Eukaryota_unclassified(100)	Eukaryota_unclassified(100)	Eukaryota_unclassified(100)	Eukaryota_unclassified(100)	Eukaryota_unclassified(100)	Eukaryota_unclassified(100)
Otu1219	8	Eukaryota(100)	Eukaryota_unclassified(100)	Eukaryota_unclassified(100)	Eukaryota_unclassified(100)	Eukaryota_unclassified(100)	Eukaryota_unclassified(100)	Eukaryota_unclassified(100)	Eukaryota_unclassified(100)
Otu1220	8	Eukaryota(100)	Opisthokonta(100)	Fungi(100)	Ascomycota(100)	Pezizomycotina(100)	Pezizomycotina_unclassified(100)	Pezizomycotina_unclassified(100)	Pezizomycotina_unclassified(100)
Otu1221	8	Eukaryota(100)	Rhizaria(100)	Rhizaria_unclassified(100)	Rhizaria_unclassified(100)	Rhizaria_unclassified(100)	Rhizaria_unclassified(100)	Rhizaria_unclassified(100)	Rhizaria_unclassified(100)
Otu1222	8	Eukaryota(100)	Eukaryota_unclassified(100)	Eukaryota_unclassified(100)	Eukaryota_unclassified(100)	Eukaryota_unclassified(100)	Eukaryota_unclassified(100)	Eukaryota_unclassified(100)	Eukaryota_unclassified(100)
Otu1223	8	Eukaryota(100)	Opisthokonta(100)	Metazoa(100)	Mollusca(100)	Gastropoda(100)	Nudibranchia(100)	Nudibranchia_unclassified(100)	Nudibranchia_unclassified(100)
Otu1224	8	Eukaryota(100)	Archaeplastida(100)	Archaeplastida_unclassified(88)	Archaeplastida_unclassified(88)	Archaeplastida_unclassified(88)	Archaeplastida_unclassified(88)	Archaeplastida_unclassified(88)	Archaeplastida_unclassified(88)
Otu1225	8	Eukaryota(100)	Eukaryota_unclassified(100)	Eukaryota_unclassified(100)	Eukaryota_unclassified(100)	Eukaryota_unclassified(100)	Eukaryota_unclassified(100)	Eukaryota_unclassified(100)	Eukaryota_unclassified(100)
Otu1226	8	Eukaryota(100)	Eukaryota_unclassified(100)	Eukaryota_unclassified(100)	Eukaryota_unclassified(100)	Eukaryota_unclassified(100)	Eukaryota_unclassified(100)	Eukaryota_unclassified(100)	Eukaryota_unclassified(100)
Otu1227	8	Eukaryota(100)	Eukaryota_unclassified(100)	Eukaryota_unclassified(100)	Eukaryota_unclassified(100)	Eukaryota_unclassified(100)	Eukaryota_unclassified(100)	Eukaryota_unclassified(100)	Eukaryota_unclassified(100)
Otu1228	8	Eukaryota(100)	Eukaryota_unclassified(100)	Eukaryota_unclassified(100)	Eukaryota_unclassified(100)	Eukaryota_unclassified(100)	Eukaryota_unclassified(100)	Eukaryota_unclassified(100)	Eukaryota_unclassified(100)
Otu1229	8	Eukaryota(100)	Archaeplastida(100)	Chlorophyta(88)	Pyramimonadales(88)	Pyramimonadales_X(88)	Pyramimonadales_XX(88)	Pyramimonadales_XX_unclassified(88)	Pyramimonadales_XX_unclassified(88)
Otu1230	8	Eukaryota(100)	Eukaryota_unclassified(100)	Eukaryota_unclassified(100)	Eukaryota_unclassified(100)	Eukaryota_unclassified(100)	Eukaryota_unclassified(100)	Eukaryota_unclassified(100)	Eukaryota_unclassified(100)
Otu1231	8	Eukaryota(100)	Opisthokonta(100)	Metazoa(100)	Mollusca(100)	Gastropoda(100)	Caenogastropoda(100)	Caenogastropoda_unclassified(100)	Caenogastropoda_unclassified(100)
Otu1232	8	Eukaryota(100)	Eukaryota_unclassified(100)	Eukaryota_unclassified(100)	Eukaryota_unclassified(100)	Eukaryota_unclassified(100)	Eukaryota_unclassified(100)	Eukaryota_unclassified(100)	Eukaryota_unclassified(100)
Otu1233	8	Eukaryota(100)	Opisthokonta(100)	Fungi(100)	Basidiomycota(100)	Agaricomycotina(100)	Agaricomycetes(100)	Agaricomycetes_unclassified(100)	Agaricomycetes_unclassified(100)
Otu1234	8	Eukaryota(100)	Rhizaria(100)	Cercozoa(100)	Filosa-Imbricatea(100)	Thaumatomonadida(100)	Thaumatomonadida_unclassified(100)	Thaumatomonadida_unclassified(100)	Thaumatomonadida_unclassified(100)
Otu1235	8	Eukaryota(100)	Eukaryota_unclassified(100)	Eukaryota_unclassified(100)	Eukaryota_unclassified(100)	Eukaryota_unclassified(100)	Eukaryota_unclassified(100)	Eukaryota_unclassified(100)	Eukaryota_unclassified(100)
Otu1236	8	Eukaryota(100)	Opisthokonta(100)	Metazoa(100)	Mollusca(100)	Bivalvia(100)	Heteroconchia(100)	Heteroconchia_unclassified(100)	Heteroconchia_unclassified(100)
Otu1237	8	Eukaryota(100)	Eukaryota_unclassified(100)	Eukaryota_unclassified(100)	Eukaryota_unclassified(100)	Eukaryota_unclassified(100)	Eukaryota_unclassified(100)	Eukaryota_unclassified(100)	Eukaryota_unclassified(100)
Otu1238	8	Eukaryota(100)	Opisthokonta(100)	Metazoa(100)	Platyhelminthes(100)	Cestoda(100)	Eucestoda(100)	Eucestoda_unclassified(100)	Eucestoda_unclassified(100)
Otu1239	8	Eukaryota(100)	Eukaryota_unclassified(100)	Eukaryota_unclassified(100)	Eukaryota_unclassified(100)	Eukaryota_unclassified(100)	Eukaryota_unclassified(100)	Eukaryota_unclassified(100)	Eukaryota_unclassified(100)
Otu1240	8	Eukaryota(100)	Opisthokonta(100)	Metazoa(100)	Craniata(100)	Craniata_X(100)	Craniata_X_unclassified(100)	Craniata_X_unclassified(100)	Craniata_X_unclassified(100)
Otu1241	8	Eukaryota(100)	Eukaryota_unclassified(100)	Eukaryota_unclassified(100)	Eukaryota_unclassified(100)	Eukaryota_unclassified(100)	Eukaryota_unclassified(100)	Eukaryota_unclassified(100)	Eukaryota_unclassified(100)
Otu1242	8	Eukaryota(100)	Eukaryota_unclassified(100)	Eukaryota_unclassified(100)	Eukaryota_unclassified(100)	Eukaryota_unclassified(100)	Eukaryota_unclassified(100)	Eukaryota_unclassified(100)	Eukaryota_unclassified(100)
Otu1243	8	Eukaryota(100)	Eukaryota_unclassified(100)	Eukaryota_unclassified(100)	Eukaryota_unclassified(100)	Eukaryota_unclassified(100)	Eukaryota_unclassified(100)	Eukaryota_unclassified(100)	Eukaryota_unclassified(100)
Otu1244	7	Eukaryota(100)	Archaeplastida(100)	Streptophyta(100)	Embryophyceae(100)	Embryophyceae_X(100)	Embryophyceae_XX(100)	Pinus(100)	Pinus_unclassified(100)
Otu1245	7	Eukaryota(100)	Stramenopiles(100)	Ochrophyta(100)	Bacillariophyta(100)	Bacillariophyta_X(100)	Polar-centric-Mediophyceae(100)	Thalassiosira(100)	Thalassiosira_hispida(100)
Otu1246	7	Eukaryota(100)	Opisthokonta(100)	Metazoa(100)	Craniata(100)	Craniata_X(100)	Craniata_X_unclassified(100)	Craniata_X_unclassified(100)	Craniata_X_unclassified(100)
Otu1247	7	Eukaryota(100)	Opisthokonta(100)	Fungi(100)	Basidiomycota(100)	Agaricomycotina(100)	Agaricomycetes(100)	Agaricomycetes_unclassified(100)	Agaricomycetes_unclassified(100)
Otu1248	7	Eukaryota(100)	Alveolata(100)	Dinoflagellata(100)	Dinophyceae(100)	Peridiniales(100)	Protoperidiniaceae(100)	Protoperidinium(100)	Protoperidinium_americanum(100)
Otu1249	7	Eukaryota(100)	Eukaryota_unclassified(100)	Eukaryota_unclassified(100)	Eukaryota_unclassified(100)	Eukaryota_unclassified(100)	Eukaryota_unclassified(100)	Eukaryota_unclassified(100)	Eukaryota_unclassified(100)
Otu1250	7	Eukaryota(100)	Excavata(100)	Discoba(100)	Euglenozoa(100)	Kinetoplastida(100)	Bodonidae(100)	Bodonidae_X(100)	Bodonidae_X_sp.(100)
Otu1251	7	Eukaryota(100)	Alveolata(100)	Dinoflagellata(100)	Dinophyceae(100)	Gonyaulacales(100)	Goniodomataceae(100)	Alexandrium(100)	Alexandrium_unclassified(86)
Otu1252	7	Eukaryota(100)	Stramenopiles(86)	Ochrophyta(86)	Dictyochophyceae(86)	Dictyochophyceae_X(86)	Pedinellales(86)	Pedinellales_unclassified(58)	Pedinellales_unclassified(58)
Otu1253	7	Eukaryota(100)	Eukaryota_unclassified(100)	Eukaryota_unclassified(100)	Eukaryota_unclassified(100)	Eukaryota_unclassified(100)	Eukaryota_unclassified(100)	Eukaryota_unclassified(100)	Eukaryota_unclassified(100)
Otu1254	7	Eukaryota(100)	Eukaryota_unclassified(100)	Eukaryota_unclassified(100)	Eukaryota_unclassified(100)	Eukaryota_unclassified(100)	Eukaryota_unclassified(100)	Eukaryota_unclassified(100)	Eukaryota_unclassified(100)
Otu1255	7	Eukaryota(100)	Opisthokonta(100)	Metazoa(100)	Arthropoda(100)	Crustacea(100)	Maxillopoda(100)	Maxillopoda_unclassified(100)	Maxillopoda_unclassified(100)
Otu1256	7	Eukaryota(100)	Rhizaria(100)	Cercozoa(100)	Filosa-Imbricatea(100)	Thaumatomonadida(100)	Thaumatomonadida_unclassified(100)	Thaumatomonadida_unclassified(100)	Thaumatomonadida_unclassified(100)
Otu1257	7	Eukaryota(100)	Archaeplastida(100)	Chlorophyta(100)	Mamiellophyceae(100)	Mamiellales(100)	Mamiellaceae(100)	Micromonas(100)	Micromonas_clade_B3(100)
Otu1258	7	Eukaryota(100)	Eukaryota_unclassified(100)	Eukaryota_unclassified(100)	Eukaryota_unclassified(100)	Eukaryota_unclassified(100)	Eukaryota_unclassified(100)	Eukaryota_unclassified(100)	Eukaryota_unclassified(100)
Otu1259	7	Eukaryota(100)	Eukaryota_unclassified(100)	Eukaryota_unclassified(100)	Eukaryota_unclassified(100)	Eukaryota_unclassified(100)	Eukaryota_unclassified(100)	Eukaryota_unclassified(100)	Eukaryota_unclassified(100)
Otu1260	7	Eukaryota(100)	Alveolata(100)	Ciliophora(100)	Spirotrichea(100)	Strombidiida(100)	Strombidiidae_M(100)	Strombidiidae_M_X(100)	Strombidiidae_M_X_sp.(100)
Otu1261	7	Eukaryota(100)	Eukaryota_unclassified(100)	Eukaryota_unclassified(100)	Eukaryota_unclassified(100)	Eukaryota_unclassified(100)	Eukaryota_unclassified(100)	Eukaryota_unclassified(100)	Eukaryota_unclassified(100)
Otu1262	7	Eukaryota(100)	Eukaryota_unclassified(100)	Eukaryota_unclassified(100)	Eukaryota_unclassified(100)	Eukaryota_unclassified(100)	Eukaryota_unclassified(100)	Eukaryota_unclassified(100)	Eukaryota_unclassified(100)
Otu1263	7	Eukaryota(100)	Rhizaria(100)	Cercozoa(100)	Filosa-Thecofilosea(100)	Ventricleftida(100)	CCW10-lineage(100)	CCW10-lineage_X(100)	CCW10-lineage_X_sp.(100)
Otu1264	7	Eukaryota(100)	Eukaryota_unclassified(100)	Eukaryota_unclassified(100)	Eukaryota_unclassified(100)	Eukaryota_unclassified(100)	Eukaryota_unclassified(100)	Eukaryota_unclassified(100)	Eukaryota_unclassified(100)
Otu1265	7	Eukaryota(100)	Eukaryota_unclassified(100)	Eukaryota_unclassified(100)	Eukaryota_unclassified(100)	Eukaryota_unclassified(100)	Eukaryota_unclassified(100)	Eukaryota_unclassified(100)	Eukaryota_unclassified(100)
Otu1266	7	Eukaryota(100)	Eukaryota_unclassified(100)	Eukaryota_unclassified(100)	Eukaryota_unclassified(100)	Eukaryota_unclassified(100)	Eukaryota_unclassified(100)	Eukaryota_unclassified(100)	Eukaryota_unclassified(100)
Otu1267	7	Eukaryota(100)	Eukaryota_unclassified(100)	Eukaryota_unclassified(100)	Eukaryota_unclassified(100)	Eukaryota_unclassified(100)	Eukaryota_unclassified(100)	Eukaryota_unclassified(100)	Eukaryota_unclassified(100)
Otu1268	7	Eukaryota(100)	Eukaryota_unclassified(100)	Eukaryota_unclassified(100)	Eukaryota_unclassified(100)	Eukaryota_unclassified(100)	Eukaryota_unclassified(100)	Eukaryota_unclassified(100)	Eukaryota_unclassified(100)
Otu1269	7	Eukaryota(100)	Archaeplastida(100)	Archaeplastida_unclassified(100)	Archaeplastida_unclassified(100)	Archaeplastida_unclassified(100)	Archaeplastida_unclassified(100)	Archaeplastida_unclassified(100)	Archaeplastida_unclassified(100)
Otu1270	7	Eukaryota(100)	Eukaryota_unclassified(100)	Eukaryota_unclassified(100)	Eukaryota_unclassified(100)	Eukaryota_unclassified(100)	Eukaryota_unclassified(100)	Eukaryota_unclassified(100)	Eukaryota_unclassified(100)
Otu1271	7	Eukaryota(100)	Alveolata(100)	Dinoflagellata(100)	Dinophyceae(100)	Gonyaulacales(100)	Goniodomataceae(100)	Alexandrium(100)	Alexandrium_unclassified(72)
Otu1272	7	Eukaryota(100)	Alveolata(100)	Dinoflagellata(100)	Dinophyceae(100)	Gonyaulacales(100)	Goniodomataceae(100)	Alexandrium(100)	Alexandrium_unclassified(100)
Otu1273	7	Eukaryota(100)	Opisthokonta(100)	Metazoa(100)	Arthropoda(100)	Crustacea(100)	Maxillopoda(100)	Maxillopoda_unclassified(100)	Maxillopoda_unclassified(100)
Otu1274	7	Eukaryota(100)	Opisthokonta(100)	Metazoa(100)	Craniata(100)	Craniata_X(100)	Craniata_X_unclassified(100)	Craniata_X_unclassified(100)	Craniata_X_unclassified(100)
Otu1275	7	Eukaryota(100)	Eukaryota_unclassified(100)	Eukaryota_unclassified(100)	Eukaryota_unclassified(100)	Eukaryota_unclassified(100)	Eukaryota_unclassified(100)	Eukaryota_unclassified(100)	Eukaryota_unclassified(100)
Otu1276	7	Eukaryota(100)	Archaeplastida(100)	Chlorophyta(100)	Mamiellophyceae(100)	Dolichomastigales(86)	Dolichomastigaceae(86)	Dolichomastigaceae-B(86)	Dolichomastigaceae-B_sp.(86)
Otu1277	7	Eukaryota(100)	Stramenopiles(100)	Stramenopiles_unclassified(100)	Stramenopiles_unclassified(100)	Stramenopiles_unclassified(100)	Stramenopiles_unclassified(100)	Stramenopiles_unclassified(100)	Stramenopiles_unclassified(100)
Otu1278	7	Eukaryota(100)	Eukaryota_unclassified(100)	Eukaryota_unclassified(100)	Eukaryota_unclassified(100)	Eukaryota_unclassified(100)	Eukaryota_unclassified(100)	Eukaryota_unclassified(100)	Eukaryota_unclassified(100)
Otu1279	7	Eukaryota(100)	Opisthokonta(100)	Fungi(100)	Basidiomycota(100)	Agaricomycotina(100)	Agaricomycetes(100)	Cheimonophyllum(100)	Cheimonophyllum_candidissimum(100)
Otu1280	7	Eukaryota(100)	Alveolata(100)	Dinoflagellata(100)	Dinophyceae(100)	Peridiniales(100)	Protoperidiniaceae(100)	Protoperidinium(100)	Protoperidinium_punctulatum(100)
Otu1281	7	Eukaryota(100)	Eukaryota_unclassified(100)	Eukaryota_unclassified(100)	Eukaryota_unclassified(100)	Eukaryota_unclassified(100)	Eukaryota_unclassified(100)	Eukaryota_unclassified(100)	Eukaryota_unclassified(100)
Otu1282	7	Eukaryota(100)	Alveolata(100)	Dinoflagellata(100)	Dinophyceae(100)	Gonyaulacales(100)	Goniodomataceae(100)	Alexandrium(100)	Alexandrium_unclassified(100)
Otu1283	7	Eukaryota(100)	Opisthokonta(100)	Metazoa(100)	Platyhelminthes(100)	Trematoda(100)	Digenea(100)	Digenea_unclassified(100)	Digenea_unclassified(100)
Otu1284	7	Eukaryota(100)	Opisthokonta(100)	Metazoa(100)	Myxozoa(100)	Myxozoa_X(100)	Myxosporea(100)	Myxosporea_unclassified(100)	Myxosporea_unclassified(100)
Otu1285	7	Eukaryota(100)	Eukaryota_unclassified(100)	Eukaryota_unclassified(100)	Eukaryota_unclassified(100)	Eukaryota_unclassified(100)	Eukaryota_unclassified(100)	Eukaryota_unclassified(100)	Eukaryota_unclassified(100)
Otu1286	7	Eukaryota(100)	Eukaryota_unclassified(100)	Eukaryota_unclassified(100)	Eukaryota_unclassified(100)	Eukaryota_unclassified(100)	Eukaryota_unclassified(100)	Eukaryota_unclassified(100)	Eukaryota_unclassified(100)
Otu1287	7	Eukaryota(100)	Stramenopiles(100)	Stramenopiles_unclassified(100)	Stramenopiles_unclassified(100)	Stramenopiles_unclassified(100)	Stramenopiles_unclassified(100)	Stramenopiles_unclassified(100)	Stramenopiles_unclassified(100)
Otu1288	7	Eukaryota(100)	Opisthokonta(100)	Opisthokonta_unclassified(100)	Opisthokonta_unclassified(100)	Opisthokonta_unclassified(100)	Opisthokonta_unclassified(100)	Opisthokonta_unclassified(100)	Opisthokonta_unclassified(100)
Otu1289	7	Eukaryota(100)	Opisthokonta(100)	Fungi(100)	Basidiomycota(100)	Agaricomycotina(100)	Agaricomycetes(100)	Agaricomycetes_unclassified(100)	Agaricomycetes_unclassified(100)
Otu1290	7	Eukaryota(100)	Eukaryota_unclassified(100)	Eukaryota_unclassified(100)	Eukaryota_unclassified(100)	Eukaryota_unclassified(100)	Eukaryota_unclassified(100)	Eukaryota_unclassified(100)	Eukaryota_unclassified(100)
Otu1291	7	Eukaryota(100)	Opisthokonta(100)	Fungi(100)	Basidiomycota(100)	Agaricomycotina(100)	Tremellomycetes(100)	Trichosporon(100)	Trichosporon_moniliiforme(100)
Otu1292	7	Eukaryota(100)	Alveolata(100)	Dinoflagellata(100)	Dinophyceae(100)	Gonyaulacales(100)	Goniodomataceae(100)	Alexandrium(100)	Alexandrium_unclassified(86)
Otu1293	7	Eukaryota(100)	Opisthokonta(100)	Metazoa(100)	Mollusca(100)	Gastropoda(100)	Nudibranchia(100)	Nudibranchia_unclassified(100)	Nudibranchia_unclassified(100)
Otu1294	7	Eukaryota(100)	Opisthokonta(100)	Opisthokonta_unclassified(100)	Opisthokonta_unclassified(100)	Opisthokonta_unclassified(100)	Opisthokonta_unclassified(100)	Opisthokonta_unclassified(100)	Opisthokonta_unclassified(100)
Otu1295	7	Eukaryota(100)	Eukaryota_unclassified(100)	Eukaryota_unclassified(100)	Eukaryota_unclassified(100)	Eukaryota_unclassified(100)	Eukaryota_unclassified(100)	Eukaryota_unclassified(100)	Eukaryota_unclassified(100)
Otu1296	7	Eukaryota(100)	Opisthokonta(100)	Metazoa(100)	Acanthocephala(100)	Acanthocephala_X(100)	Acanthocephala_XX(100)	Acanthocephala_XX_unclassified(100)	Acanthocephala_XX_unclassified(100)
Otu1297	7	Eukaryota(100)	Eukaryota_unclassified(100)	Eukaryota_unclassified(100)	Eukaryota_unclassified(100)	Eukaryota_unclassified(100)	Eukaryota_unclassified(100)	Eukaryota_unclassified(100)	Eukaryota_unclassified(100)
Otu1298	7	Eukaryota(100)	Stramenopiles(100)	Ochrophyta(100)	Ochrophyta_unclassified(100)	Ochrophyta_unclassified(100)	Ochrophyta_unclassified(100)	Ochrophyta_unclassified(100)	Ochrophyta_unclassified(100)
Otu1299	7	Eukaryota(100)	Eukaryota_unclassified(100)	Eukaryota_unclassified(100)	Eukaryota_unclassified(100)	Eukaryota_unclassified(100)	Eukaryota_unclassified(100)	Eukaryota_unclassified(100)	Eukaryota_unclassified(100)
Otu1300	7	Eukaryota(100)	Opisthokonta(100)	Metazoa(100)	Cnidaria(100)	Cnidaria_X(100)	Scyphozoa(100)	Cyanea(100)	Cyanea_capillata(100)
Otu1301	7	Eukaryota(100)	Eukaryota_unclassified(100)	Eukaryota_unclassified(100)	Eukaryota_unclassified(100)	Eukaryota_unclassified(100)	Eukaryota_unclassified(100)	Eukaryota_unclassified(100)	Eukaryota_unclassified(100)
Otu1302	7	Eukaryota(100)	Eukaryota_unclassified(100)	Eukaryota_unclassified(100)	Eukaryota_unclassified(100)	Eukaryota_unclassified(100)	Eukaryota_unclassified(100)	Eukaryota_unclassified(100)	Eukaryota_unclassified(100)
Otu1303	7	Eukaryota(100)	Eukaryota_unclassified(100)	Eukaryota_unclassified(100)	Eukaryota_unclassified(100)	Eukaryota_unclassified(100)	Eukaryota_unclassified(100)	Eukaryota_unclassified(100)	Eukaryota_unclassified(100)
Otu1304	7	Eukaryota(100)	Eukaryota_unclassified(100)	Eukaryota_unclassified(100)	Eukaryota_unclassified(100)	Eukaryota_unclassified(100)	Eukaryota_unclassified(100)	Eukaryota_unclassified(100)	Eukaryota_unclassified(100)
Otu1305	7	Eukaryota(100)	Eukaryota_unclassified(100)	Eukaryota_unclassified(100)	Eukaryota_unclassified(100)	Eukaryota_unclassified(100)	Eukaryota_unclassified(100)	Eukaryota_unclassified(100)	Eukaryota_unclassified(100)
Otu1306	7	Eukaryota(100)	Opisthokonta(100)	Metazoa(100)	Nematoda(100)	Chromadorea(100)	Chromadorea_X(100)	Chromadorea_X_unclassified(100)	Chromadorea_X_unclassified(100)
Otu1307	7	Eukaryota(100)	Eukaryota_unclassified(100)	Eukaryota_unclassified(100)	Eukaryota_unclassified(100)	Eukaryota_unclassified(100)	Eukaryota_unclassified(100)	Eukaryota_unclassified(100)	Eukaryota_unclassified(100)
Otu1308	7	Eukaryota(100)	Eukaryota_unclassified(100)	Eukaryota_unclassified(100)	Eukaryota_unclassified(100)	Eukaryota_unclassified(100)	Eukaryota_unclassified(100)	Eukaryota_unclassified(100)	Eukaryota_unclassified(100)
Otu1309	7	Eukaryota(100)	Opisthokonta(100)	Metazoa(100)	Platyhelminthes(100)	Trematoda(100)	Digenea(100)	Digenea_unclassified(100)	Digenea_unclassified(100)
Otu1310	7	Eukaryota(100)	Eukaryota_unclassified(100)	Eukaryota_unclassified(100)	Eukaryota_unclassified(100)	Eukaryota_unclassified(100)	Eukaryota_unclassified(100)	Eukaryota_unclassified(100)	Eukaryota_unclassified(100)
Otu1311	7	Eukaryota(100)	Alveolata(100)	Dinoflagellata(100)	Dinophyceae(100)	Gonyaulacales(100)	Goniodomataceae(86)	Alexandrium(86)	Alexandrium_unclassified(72)
Otu1312	7	Eukaryota(100)	Opisthokonta(100)	Metazoa(100)	Metazoa_unclassified(100)	Metazoa_unclassified(100)	Metazoa_unclassified(100)	Metazoa_unclassified(100)	Metazoa_unclassified(100)
Otu1313	7	Eukaryota(100)	Eukaryota_unclassified(100)	Eukaryota_unclassified(100)	Eukaryota_unclassified(100)	Eukaryota_unclassified(100)	Eukaryota_unclassified(100)	Eukaryota_unclassified(100)	Eukaryota_unclassified(100)
Otu1314	7	Eukaryota(100)	Eukaryota_unclassified(100)	Eukaryota_unclassified(100)	Eukaryota_unclassified(100)	Eukaryota_unclassified(100)	Eukaryota_unclassified(100)	Eukaryota_unclassified(100)	Eukaryota_unclassified(100)
Otu1315	7	Eukaryota(100)	Eukaryota_unclassified(100)	Eukaryota_unclassified(100)	Eukaryota_unclassified(100)	Eukaryota_unclassified(100)	Eukaryota_unclassified(100)	Eukaryota_unclassified(100)	Eukaryota_unclassified(100)
Otu1316	7	Eukaryota(100)	Eukaryota_unclassified(100)	Eukaryota_unclassified(100)	Eukaryota_unclassified(100)	Eukaryota_unclassified(100)	Eukaryota_unclassified(100)	Eukaryota_unclassified(100)	Eukaryota_unclassified(100)
Otu1317	7	Eukaryota(100)	Alveolata(100)	Dinoflagellata(100)	Dinophyceae(100)	Peridiniales(100)	Thoracosphaeraceae(86)	Thoracosphaeraceae_unclassified(86)	Thoracosphaeraceae_unclassified(86)
Otu1318	7	Eukaryota(100)	Alveolata(100)	Dinoflagellata(100)	Dinophyceae(100)	Gonyaulacales(100)	Goniodomataceae(100)	Alexandrium(100)	Alexandrium_unclassified(58)
Otu1319	7	Eukaryota(100)	Opisthokonta(100)	Metazoa(100)	Cnidaria(100)	Cnidaria_X(100)	Hydrozoa(100)	Hydractinia(86)	Hydractinia_unclassified(86)
Otu1320	7	Eukaryota(100)	Rhizaria(100)	Cercozoa(100)	Filosa-Thecofilosea(100)	Cryomonadida(100)	Protaspa-lineage(100)	Protaspa-lineage_unclassified(100)	Protaspa-lineage_unclassified(100)
Otu1321	7	Eukaryota(100)	Eukaryota_unclassified(100)	Eukaryota_unclassified(100)	Eukaryota_unclassified(100)	Eukaryota_unclassified(100)	Eukaryota_unclassified(100)	Eukaryota_unclassified(100)	Eukaryota_unclassified(100)
Otu1322	7	Eukaryota(100)	Opisthokonta(100)	Metazoa(100)	Craniata(100)	Craniata_X(100)	Craniata_X_unclassified(100)	Craniata_X_unclassified(100)	Craniata_X_unclassified(100)
Otu1323	7	Eukaryota(100)	Opisthokonta(100)	Metazoa(100)	Nematoda(100)	Chromadorea(100)	Chromadorea_X(100)	Strongyloides(100)	Strongyloides_procyonis(86)
Otu1324	7	Eukaryota(100)	Archaeplastida(100)	Archaeplastida_unclassified(100)	Archaeplastida_unclassified(100)	Archaeplastida_unclassified(100)	Archaeplastida_unclassified(100)	Archaeplastida_unclassified(100)	Archaeplastida_unclassified(100)
Otu1325	7	Eukaryota(100)	Eukaryota_unclassified(100)	Eukaryota_unclassified(100)	Eukaryota_unclassified(100)	Eukaryota_unclassified(100)	Eukaryota_unclassified(100)	Eukaryota_unclassified(100)	Eukaryota_unclassified(100)
Otu1326	7	Eukaryota(100)	Eukaryota_unclassified(100)	Eukaryota_unclassified(100)	Eukaryota_unclassified(100)	Eukaryota_unclassified(100)	Eukaryota_unclassified(100)	Eukaryota_unclassified(100)	Eukaryota_unclassified(100)
Otu1327	7	Eukaryota(100)	Eukaryota_unclassified(100)	Eukaryota_unclassified(100)	Eukaryota_unclassified(100)	Eukaryota_unclassified(100)	Eukaryota_unclassified(100)	Eukaryota_unclassified(100)	Eukaryota_unclassified(100)
Otu1328	7	Eukaryota(100)	Eukaryota_unclassified(100)	Eukaryota_unclassified(100)	Eukaryota_unclassified(100)	Eukaryota_unclassified(100)	Eukaryota_unclassified(100)	Eukaryota_unclassified(100)	Eukaryota_unclassified(100)
Otu1329	7	Eukaryota(100)	Eukaryota_unclassified(100)	Eukaryota_unclassified(100)	Eukaryota_unclassified(100)	Eukaryota_unclassified(100)	Eukaryota_unclassified(100)	Eukaryota_unclassified(100)	Eukaryota_unclassified(100)
Otu1330	7	Eukaryota(100)	Eukaryota_unclassified(100)	Eukaryota_unclassified(100)	Eukaryota_unclassified(100)	Eukaryota_unclassified(100)	Eukaryota_unclassified(100)	Eukaryota_unclassified(100)	Eukaryota_unclassified(100)
Otu1331	7	Eukaryota(100)	Opisthokonta(100)	Metazoa(100)	Myxozoa(100)	Myxozoa_X(100)	Myxosporea(100)	Myxosporea_unclassified(100)	Myxosporea_unclassified(100)
Otu1332	7	Eukaryota(100)	Opisthokonta(100)	Fungi(100)	Basidiomycota(100)	Ustilaginomycotina(100)	Exobasidiomycetes(100)	Malassezia(100)	Malassezia_sp.(100)
Otu1333	7	Eukaryota(100)	Eukaryota_unclassified(100)	Eukaryota_unclassified(100)	Eukaryota_unclassified(100)	Eukaryota_unclassified(100)	Eukaryota_unclassified(100)	Eukaryota_unclassified(100)	Eukaryota_unclassified(100)
Otu1334	7	Eukaryota(100)	Eukaryota_unclassified(100)	Eukaryota_unclassified(100)	Eukaryota_unclassified(100)	Eukaryota_unclassified(100)	Eukaryota_unclassified(100)	Eukaryota_unclassified(100)	Eukaryota_unclassified(100)
Otu1335	7	Eukaryota(100)	Eukaryota_unclassified(100)	Eukaryota_unclassified(100)	Eukaryota_unclassified(100)	Eukaryota_unclassified(100)	Eukaryota_unclassified(100)	Eukaryota_unclassified(100)	Eukaryota_unclassified(100)
Otu1336	7	Eukaryota(100)	Archaeplastida(100)	Chlorophyta(100)	Chlorophyta_unclassified(86)	Chlorophyta_unclassified(86)	Chlorophyta_unclassified(86)	Chlorophyta_unclassified(86)	Chlorophyta_unclassified(86)
Otu1337	7	Eukaryota(100)	Eukaryota_unclassified(100)	Eukaryota_unclassified(100)	Eukaryota_unclassified(100)	Eukaryota_unclassified(100)	Eukaryota_unclassified(100)	Eukaryota_unclassified(100)	Eukaryota_unclassified(100)
Otu1338	7	Eukaryota(100)	Opisthokonta(100)	Opisthokonta_unclassified(100)	Opisthokonta_unclassified(100)	Opisthokonta_unclassified(100)	Opisthokonta_unclassified(100)	Opisthokonta_unclassified(100)	Opisthokonta_unclassified(100)
Otu1339	7	Eukaryota(100)	Opisthokonta(100)	Metazoa(100)	Platyhelminthes(100)	Trematoda(100)	Digenea(100)	Digenea_unclassified(100)	Digenea_unclassified(100)
Otu1340	7	Eukaryota(100)	Eukaryota_unclassified(100)	Eukaryota_unclassified(100)	Eukaryota_unclassified(100)	Eukaryota_unclassified(100)	Eukaryota_unclassified(100)	Eukaryota_unclassified(100)	Eukaryota_unclassified(100)
Otu1341	7	Eukaryota(100)	Eukaryota_unclassified(100)	Eukaryota_unclassified(100)	Eukaryota_unclassified(100)	Eukaryota_unclassified(100)	Eukaryota_unclassified(100)	Eukaryota_unclassified(100)	Eukaryota_unclassified(100)
Otu1342	7	Eukaryota(100)	Eukaryota_unclassified(100)	Eukaryota_unclassified(100)	Eukaryota_unclassified(100)	Eukaryota_unclassified(100)	Eukaryota_unclassified(100)	Eukaryota_unclassified(100)	Eukaryota_unclassified(100)
Otu1343	7	Eukaryota(100)	Archaeplastida(100)	Archaeplastida_unclassified(100)	Archaeplastida_unclassified(100)	Archaeplastida_unclassified(100)	Archaeplastida_unclassified(100)	Archaeplastida_unclassified(100)	Archaeplastida_unclassified(100)
Otu1344	7	Eukaryota(100)	Alveolata(100)	Dinoflagellata(100)	Dinophyceae(100)	Gonyaulacales(100)	Goniodomataceae(100)	Alexandrium(100)	Alexandrium_unclassified(100)
Otu1345	7	Eukaryota(100)	Eukaryota_unclassified(100)	Eukaryota_unclassified(100)	Eukaryota_unclassified(100)	Eukaryota_unclassified(100)	Eukaryota_unclassified(100)	Eukaryota_unclassified(100)	Eukaryota_unclassified(100)
Otu1346	7	Eukaryota(100)	Opisthokonta(100)	Metazoa(100)	Acanthocephala(100)	Acanthocephala_X(100)	Acanthocephala_XX(100)	Acanthocephala_XX_unclassified(86)	Acanthocephala_XX_unclassified(86)
Otu1347	7	Eukaryota(100)	Opisthokonta(100)	Metazoa(100)	Mollusca(100)	Gastropoda(100)	Nudibranchia(86)	Nudibranchia_unclassified(86)	Nudibranchia_unclassified(86)
Otu1348	7	Eukaryota(100)	Alveolata(100)	Dinoflagellata(100)	Dinophyceae(100)	Peridiniales(100)	Amphidiniopsidaceae(100)	Archaeperidinium(100)	Archaeperidinium_unclassified(100)
Otu1349	7	Eukaryota(100)	Eukaryota_unclassified(100)	Eukaryota_unclassified(100)	Eukaryota_unclassified(100)	Eukaryota_unclassified(100)	Eukaryota_unclassified(100)	Eukaryota_unclassified(100)	Eukaryota_unclassified(100)
Otu1350	7	Eukaryota(100)	Opisthokonta(100)	Metazoa(100)	Acanthocephala(100)	Acanthocephala_X(100)	Acanthocephala_XX(100)	Corynosoma(72)	Corynosoma_unclassified(72)
Otu1351	6	Eukaryota(100)	Eukaryota_unclassified(100)	Eukaryota_unclassified(100)	Eukaryota_unclassified(100)	Eukaryota_unclassified(100)	Eukaryota_unclassified(100)	Eukaryota_unclassified(100)	Eukaryota_unclassified(100)
Otu1352	6	Eukaryota(100)	Eukaryota_unclassified(100)	Eukaryota_unclassified(100)	Eukaryota_unclassified(100)	Eukaryota_unclassified(100)	Eukaryota_unclassified(100)	Eukaryota_unclassified(100)	Eukaryota_unclassified(100)
Otu1353	6	Eukaryota(100)	Eukaryota_unclassified(100)	Eukaryota_unclassified(100)	Eukaryota_unclassified(100)	Eukaryota_unclassified(100)	Eukaryota_unclassified(100)	Eukaryota_unclassified(100)	Eukaryota_unclassified(100)
Otu1354	6	Eukaryota(100)	Eukaryota_unclassified(100)	Eukaryota_unclassified(100)	Eukaryota_unclassified(100)	Eukaryota_unclassified(100)	Eukaryota_unclassified(100)	Eukaryota_unclassified(100)	Eukaryota_unclassified(100)
Otu1355	6	Eukaryota(100)	Eukaryota_unclassified(100)	Eukaryota_unclassified(100)	Eukaryota_unclassified(100)	Eukaryota_unclassified(100)	Eukaryota_unclassified(100)	Eukaryota_unclassified(100)	Eukaryota_unclassified(100)
Otu1356	6	Eukaryota(100)	Opisthokonta(100)	Metazoa(100)	Acanthocephala(100)	Acanthocephala_X(100)	Acanthocephala_XX(100)	Acanthocephala_XX_unclassified(100)	Acanthocephala_XX_unclassified(100)
Otu1357	6	Eukaryota(100)	Eukaryota_unclassified(100)	Eukaryota_unclassified(100)	Eukaryota_unclassified(100)	Eukaryota_unclassified(100)	Eukaryota_unclassified(100)	Eukaryota_unclassified(100)	Eukaryota_unclassified(100)
Otu1358	6	Eukaryota(100)	Opisthokonta(100)	Metazoa(100)	Rotifera(100)	Rotifera_X(100)	Rotifera_XX(100)	Rotifera_XX_unclassified(100)	Rotifera_XX_unclassified(100)
Otu1359	6	Eukaryota(100)	Eukaryota_unclassified(100)	Eukaryota_unclassified(100)	Eukaryota_unclassified(100)	Eukaryota_unclassified(100)	Eukaryota_unclassified(100)	Eukaryota_unclassified(100)	Eukaryota_unclassified(100)
Otu1360	6	Eukaryota(100)	Alveolata(100)	Dinoflagellata(100)	Dinophyceae(100)	Gymnodiniales(84)	Gymnodiniales_unclassified(84)	Gymnodiniales_unclassified(84)	Gymnodiniales_unclassified(84)
Otu1361	6	Eukaryota(100)	Eukaryota_unclassified(100)	Eukaryota_unclassified(100)	Eukaryota_unclassified(100)	Eukaryota_unclassified(100)	Eukaryota_unclassified(100)	Eukaryota_unclassified(100)	Eukaryota_unclassified(100)
Otu1362	6	Eukaryota(100)	Alveolata(100)	Dinoflagellata(100)	Dinophyceae(100)	Peridiniales(100)	Protoperidiniaceae(100)	Protoperidinium(100)	Protoperidinium_punctulatum(100)
Otu1363	6	Eukaryota(100)	Opisthokonta(100)	Fungi(100)	Ascomycota(100)	Pezizomycotina(100)	Pezizomycotina_unclassified(100)	Pezizomycotina_unclassified(100)	Pezizomycotina_unclassified(100)
Otu1364	6	Eukaryota(100)	Eukaryota_unclassified(100)	Eukaryota_unclassified(100)	Eukaryota_unclassified(100)	Eukaryota_unclassified(100)	Eukaryota_unclassified(100)	Eukaryota_unclassified(100)	Eukaryota_unclassified(100)
Otu1365	6	Eukaryota(100)	Eukaryota_unclassified(100)	Eukaryota_unclassified(100)	Eukaryota_unclassified(100)	Eukaryota_unclassified(100)	Eukaryota_unclassified(100)	Eukaryota_unclassified(100)	Eukaryota_unclassified(100)
Otu1366	6	Eukaryota(100)	Eukaryota_unclassified(100)	Eukaryota_unclassified(100)	Eukaryota_unclassified(100)	Eukaryota_unclassified(100)	Eukaryota_unclassified(100)	Eukaryota_unclassified(100)	Eukaryota_unclassified(100)
Otu1367	6	Eukaryota(100)	Eukaryota_unclassified(100)	Eukaryota_unclassified(100)	Eukaryota_unclassified(100)	Eukaryota_unclassified(100)	Eukaryota_unclassified(100)	Eukaryota_unclassified(100)	Eukaryota_unclassified(100)
Otu1368	6	Eukaryota(100)	Rhizaria(100)	Cercozoa(100)	Filosa-Imbricatea(100)	Thaumatomonadida(100)	Thaumatomonadida_unclassified(100)	Thaumatomonadida_unclassified(100)	Thaumatomonadida_unclassified(100)
Otu1369	6	Eukaryota(100)	Eukaryota_unclassified(100)	Eukaryota_unclassified(100)	Eukaryota_unclassified(100)	Eukaryota_unclassified(100)	Eukaryota_unclassified(100)	Eukaryota_unclassified(100)	Eukaryota_unclassified(100)
Otu1370	6	Eukaryota(100)	Eukaryota_unclassified(100)	Eukaryota_unclassified(100)	Eukaryota_unclassified(100)	Eukaryota_unclassified(100)	Eukaryota_unclassified(100)	Eukaryota_unclassified(100)	Eukaryota_unclassified(100)
Otu1371	6	Eukaryota(100)	Eukaryota_unclassified(100)	Eukaryota_unclassified(100)	Eukaryota_unclassified(100)	Eukaryota_unclassified(100)	Eukaryota_unclassified(100)	Eukaryota_unclassified(100)	Eukaryota_unclassified(100)
Otu1372	6	Eukaryota(100)	Alveolata(100)	Dinoflagellata(100)	Dinophyceae(100)	Dinophyceae_unclassified(100)	Dinophyceae_unclassified(100)	Dinophyceae_unclassified(100)	Dinophyceae_unclassified(100)
Otu1373	6	Eukaryota(100)	Eukaryota_unclassified(100)	Eukaryota_unclassified(100)	Eukaryota_unclassified(100)	Eukaryota_unclassified(100)	Eukaryota_unclassified(100)	Eukaryota_unclassified(100)	Eukaryota_unclassified(100)
Otu1374	6	Eukaryota(100)	Eukaryota_unclassified(100)	Eukaryota_unclassified(100)	Eukaryota_unclassified(100)	Eukaryota_unclassified(100)	Eukaryota_unclassified(100)	Eukaryota_unclassified(100)	Eukaryota_unclassified(100)
Otu1375	6	Eukaryota(100)	Eukaryota_unclassified(100)	Eukaryota_unclassified(100)	Eukaryota_unclassified(100)	Eukaryota_unclassified(100)	Eukaryota_unclassified(100)	Eukaryota_unclassified(100)	Eukaryota_unclassified(100)
Otu1376	6	Eukaryota(100)	Eukaryota_unclassified(100)	Eukaryota_unclassified(100)	Eukaryota_unclassified(100)	Eukaryota_unclassified(100)	Eukaryota_unclassified(100)	Eukaryota_unclassified(100)	Eukaryota_unclassified(100)
Otu1377	6	Eukaryota(100)	Eukaryota_unclassified(100)	Eukaryota_unclassified(100)	Eukaryota_unclassified(100)	Eukaryota_unclassified(100)	Eukaryota_unclassified(100)	Eukaryota_unclassified(100)	Eukaryota_unclassified(100)
Otu1378	6	Eukaryota(100)	Eukaryota_unclassified(100)	Eukaryota_unclassified(100)	Eukaryota_unclassified(100)	Eukaryota_unclassified(100)	Eukaryota_unclassified(100)	Eukaryota_unclassified(100)	Eukaryota_unclassified(100)
Otu1379	6	Eukaryota(100)	Opisthokonta(100)	Metazoa(100)	Mollusca(100)	Gastropoda(100)	Gastropoda_unclassified(67)	Gastropoda_unclassified(67)	Gastropoda_unclassified(67)
Otu1380	6	Eukaryota(100)	Archaeplastida(100)	Archaeplastida_unclassified(100)	Archaeplastida_unclassified(100)	Archaeplastida_unclassified(100)	Archaeplastida_unclassified(100)	Archaeplastida_unclassified(100)	Archaeplastida_unclassified(100)
Otu1381	6	Eukaryota(100)	Eukaryota_unclassified(100)	Eukaryota_unclassified(100)	Eukaryota_unclassified(100)	Eukaryota_unclassified(100)	Eukaryota_unclassified(100)	Eukaryota_unclassified(100)	Eukaryota_unclassified(100)
Otu1382	6	Eukaryota(100)	Stramenopiles(100)	Ochrophyta(100)	Dictyochophyceae(100)	Dictyochophyceae_X(100)	Pedinellales(100)	Pseudopedinella(100)	Pseudopedinella_elastica(100)
Otu1383	6	Eukaryota(100)	Opisthokonta(100)	Metazoa(100)	Platyhelminthes(100)	Trematoda(100)	Digenea(100)	Steringophorus(100)	Steringophorus_margolisi(100)
Otu1384	6	Eukaryota(100)	Rhizaria(100)	Cercozoa(100)	Endomyxa(100)	Vampyrellida(100)	Sey055-lineage(100)	Sey055-lineage_X(100)	Sey055-lineage_X_sp.(100)
Otu1385	6	Eukaryota(100)	Stramenopiles(100)	Ochrophyta(100)	Dictyochophyceae(100)	Dictyochophyceae_X(100)	Pedinellales(100)	Pedinellales_unclassified(100)	Pedinellales_unclassified(100)
Otu1386	6	Eukaryota(100)	Eukaryota_unclassified(100)	Eukaryota_unclassified(100)	Eukaryota_unclassified(100)	Eukaryota_unclassified(100)	Eukaryota_unclassified(100)	Eukaryota_unclassified(100)	Eukaryota_unclassified(100)
Otu1387	6	Eukaryota(100)	Rhizaria(100)	Cercozoa(100)	Filosa-Imbricatea(100)	Thaumatomonadida(100)	Thaumatomonadida_unclassified(100)	Thaumatomonadida_unclassified(100)	Thaumatomonadida_unclassified(100)
Otu1388	6	Eukaryota(100)	Eukaryota_unclassified(100)	Eukaryota_unclassified(100)	Eukaryota_unclassified(100)	Eukaryota_unclassified(100)	Eukaryota_unclassified(100)	Eukaryota_unclassified(100)	Eukaryota_unclassified(100)
Otu1389	6	Eukaryota(100)	Stramenopiles(100)	Opalozoa(100)	MAST-12(100)	MAST-12A(100)	MAST-12A_X(100)	MAST-12A_XX(100)	MAST-12A_XX_sp.(100)
Otu1390	6	Eukaryota(100)	Alveolata(100)	Dinoflagellata(100)	Dinophyceae(100)	Gymnodiniales(100)	Gymnodiniales_X(100)	Levanderina(100)	Levanderina_fissa(100)
Otu1391	6	Eukaryota(100)	Opisthokonta(100)	Metazoa(100)	Acanthocephala(100)	Acanthocephala_X(100)	Acanthocephala_XX(100)	Acanthocephala_XX_unclassified(100)	Acanthocephala_XX_unclassified(100)
Otu1392	6	Eukaryota(100)	Stramenopiles(100)	Ochrophyta(100)	Bacillariophyta(100)	Bacillariophyta_X(100)	Polar-centric-Mediophyceae(100)	Polar-centric-Mediophyceae_unclassified(100)	Polar-centric-Mediophyceae_unclassified(100)
Otu1393	6	Eukaryota(100)	Opisthokonta(100)	Fungi(100)	Basidiomycota(100)	Pucciniomycotina(100)	Cystobasidiomycetes(100)	Rhodotorula(100)	Rhodotorula_glutinis(100)
Otu1394	6	Eukaryota(100)	Eukaryota_unclassified(100)	Eukaryota_unclassified(100)	Eukaryota_unclassified(100)	Eukaryota_unclassified(100)	Eukaryota_unclassified(100)	Eukaryota_unclassified(100)	Eukaryota_unclassified(100)
Otu1395	6	Eukaryota(100)	Archaeplastida(100)	Chlorophyta(100)	Mamiellophyceae(100)	Mamiellales(100)	Mamiellaceae(100)	Mantoniella(100)	Mantoniella_unclassified(84)
Otu1396	6	Eukaryota(100)	Eukaryota_unclassified(100)	Eukaryota_unclassified(100)	Eukaryota_unclassified(100)	Eukaryota_unclassified(100)	Eukaryota_unclassified(100)	Eukaryota_unclassified(100)	Eukaryota_unclassified(100)
Otu1397	6	Eukaryota(100)	Alveolata(100)	Dinoflagellata(100)	Dinophyceae(100)	Gonyaulacales(100)	Goniodomataceae(100)	Alexandrium(100)	Alexandrium_unclassified(100)
Otu1398	6	Eukaryota(100)	Stramenopiles(100)	Sagenista(84)	Labyrinthulomycetes(84)	Labyrinthulomycetes_unclassified(84)	Labyrinthulomycetes_unclassified(84)	Labyrinthulomycetes_unclassified(84)	Labyrinthulomycetes_unclassified(84)
Otu1399	6	Eukaryota(100)	Rhizaria(100)	Cercozoa(100)	Cercozoa_unclassified(100)	Cercozoa_unclassified(100)	Cercozoa_unclassified(100)	Cercozoa_unclassified(100)	Cercozoa_unclassified(100)
Otu1400	6	Eukaryota(100)	Stramenopiles(100)	Ochrophyta(100)	Bacillariophyta(100)	Bacillariophyta_X(100)	Bacillariophyta_X_unclassified(100)	Bacillariophyta_X_unclassified(100)	Bacillariophyta_X_unclassified(100)
Otu1401	6	Eukaryota(100)	Eukaryota_unclassified(100)	Eukaryota_unclassified(100)	Eukaryota_unclassified(100)	Eukaryota_unclassified(100)	Eukaryota_unclassified(100)	Eukaryota_unclassified(100)	Eukaryota_unclassified(100)
Otu1402	6	Eukaryota(100)	Eukaryota_unclassified(100)	Eukaryota_unclassified(100)	Eukaryota_unclassified(100)	Eukaryota_unclassified(100)	Eukaryota_unclassified(100)	Eukaryota_unclassified(100)	Eukaryota_unclassified(100)
Otu1403	6	Eukaryota(100)	Opisthokonta(100)	Metazoa(100)	Mollusca(100)	Gastropoda(100)	Gastropoda_unclassified(100)	Gastropoda_unclassified(100)	Gastropoda_unclassified(100)
Otu1404	6	Eukaryota(100)	Eukaryota_unclassified(100)	Eukaryota_unclassified(100)	Eukaryota_unclassified(100)	Eukaryota_unclassified(100)	Eukaryota_unclassified(100)	Eukaryota_unclassified(100)	Eukaryota_unclassified(100)
Otu1405	6	Eukaryota(100)	Archaeplastida(100)	Archaeplastida_unclassified(84)	Archaeplastida_unclassified(84)	Archaeplastida_unclassified(84)	Archaeplastida_unclassified(84)	Archaeplastida_unclassified(84)	Archaeplastida_unclassified(84)
Otu1406	6	Eukaryota(100)	Eukaryota_unclassified(100)	Eukaryota_unclassified(100)	Eukaryota_unclassified(100)	Eukaryota_unclassified(100)	Eukaryota_unclassified(100)	Eukaryota_unclassified(100)	Eukaryota_unclassified(100)
Otu1407	6	Eukaryota(100)	Eukaryota_unclassified(100)	Eukaryota_unclassified(100)	Eukaryota_unclassified(100)	Eukaryota_unclassified(100)	Eukaryota_unclassified(100)	Eukaryota_unclassified(100)	Eukaryota_unclassified(100)
Otu1408	6	Eukaryota(100)	Eukaryota_unclassified(100)	Eukaryota_unclassified(100)	Eukaryota_unclassified(100)	Eukaryota_unclassified(100)	Eukaryota_unclassified(100)	Eukaryota_unclassified(100)	Eukaryota_unclassified(100)
Otu1409	6	Eukaryota(100)	Archaeplastida(100)	Chlorophyta(100)	Palmophyllophyceae(100)	Prasinococcales(100)	Prasinococcales-Clade-B(100)	Prasinococcales-Clade-B_X(100)	Prasinococcales-Clade-B2_X_sp.(100)
Otu1410	6	Eukaryota(100)	Amoebozoa(100)	Conosa(100)	Mycetozoa-Myxogastrea(100)	Stemonitales-Physarales(100)	Stemonitales-Physarales_unclassified(100)	Stemonitales-Physarales_unclassified(100)	Stemonitales-Physarales_unclassified(100)
Otu1411	6	Eukaryota(100)	Alveolata(100)	Dinoflagellata(100)	Dinophyceae(100)	Dinophyceae_unclassified(100)	Dinophyceae_unclassified(100)	Dinophyceae_unclassified(100)	Dinophyceae_unclassified(100)
Otu1412	6	Eukaryota(100)	Opisthokonta(100)	Fungi(100)	Basidiomycota(100)	Agaricomycotina(100)	Agaricomycetes(100)	Agaricomycetes_unclassified(100)	Agaricomycetes_unclassified(100)
Otu1413	6	Eukaryota(100)	Eukaryota_unclassified(100)	Eukaryota_unclassified(100)	Eukaryota_unclassified(100)	Eukaryota_unclassified(100)	Eukaryota_unclassified(100)	Eukaryota_unclassified(100)	Eukaryota_unclassified(100)
Otu1414	6	Eukaryota(100)	Archaeplastida(84)	Chlorophyta(67)	Mamiellophyceae(67)	Dolichomastigales(67)	Dolichomastigales_unclassified(67)	Dolichomastigales_unclassified(67)	Dolichomastigales_unclassified(67)
Otu1415	6	Eukaryota(100)	Eukaryota_unclassified(100)	Eukaryota_unclassified(100)	Eukaryota_unclassified(100)	Eukaryota_unclassified(100)	Eukaryota_unclassified(100)	Eukaryota_unclassified(100)	Eukaryota_unclassified(100)
Otu1416	6	Eukaryota(100)	Opisthokonta(100)	Opisthokonta_unclassified(100)	Opisthokonta_unclassified(100)	Opisthokonta_unclassified(100)	Opisthokonta_unclassified(100)	Opisthokonta_unclassified(100)	Opisthokonta_unclassified(100)
Otu1417	6	Eukaryota(100)	Eukaryota_unclassified(100)	Eukaryota_unclassified(100)	Eukaryota_unclassified(100)	Eukaryota_unclassified(100)	Eukaryota_unclassified(100)	Eukaryota_unclassified(100)	Eukaryota_unclassified(100)
Otu1418	6	Eukaryota(100)	Opisthokonta(100)	Metazoa(100)	Mollusca(100)	Gastropoda(100)	Caenogastropoda(100)	Caenogastropoda_unclassified(100)	Caenogastropoda_unclassified(100)
Otu1419	6	Eukaryota(100)	Eukaryota_unclassified(100)	Eukaryota_unclassified(100)	Eukaryota_unclassified(100)	Eukaryota_unclassified(100)	Eukaryota_unclassified(100)	Eukaryota_unclassified(100)	Eukaryota_unclassified(100)
Otu1420	6	Eukaryota(100)	Opisthokonta(100)	Metazoa(100)	Acanthocephala(100)	Acanthocephala_X(100)	Acanthocephala_XX(100)	Acanthocephala_XX_unclassified(100)	Acanthocephala_XX_unclassified(100)
Otu1421	6	Eukaryota(100)	Eukaryota_unclassified(100)	Eukaryota_unclassified(100)	Eukaryota_unclassified(100)	Eukaryota_unclassified(100)	Eukaryota_unclassified(100)	Eukaryota_unclassified(100)	Eukaryota_unclassified(100)
Otu1422	6	Eukaryota(100)	Alveolata(100)	Dinoflagellata(100)	Dinophyceae(100)	Gonyaulacales(100)	Goniodomataceae(100)	Alexandrium(100)	Alexandrium_unclassified(100)
Otu1423	6	Eukaryota(100)	Alveolata(100)	Dinoflagellata(100)	Dinophyceae(100)	Peridiniales(84)	Protoperidiniaceae(84)	Protoperidinium(84)	Protoperidinium_punctulatum(84)
Otu1424	6	Eukaryota(100)	Eukaryota_unclassified(100)	Eukaryota_unclassified(100)	Eukaryota_unclassified(100)	Eukaryota_unclassified(100)	Eukaryota_unclassified(100)	Eukaryota_unclassified(100)	Eukaryota_unclassified(100)
Otu1425	6	Eukaryota(100)	Rhizaria(100)	Cercozoa(100)	Filosa-Thecofilosea(100)	Filosa-Thecofilosea_X(100)	Mataza-lineage(100)	Mataza(100)	Mataza_hastifera(100)
Otu1426	6	Eukaryota(100)	Eukaryota_unclassified(100)	Eukaryota_unclassified(100)	Eukaryota_unclassified(100)	Eukaryota_unclassified(100)	Eukaryota_unclassified(100)	Eukaryota_unclassified(100)	Eukaryota_unclassified(100)
Otu1427	6	Eukaryota(100)	Eukaryota_unclassified(100)	Eukaryota_unclassified(100)	Eukaryota_unclassified(100)	Eukaryota_unclassified(100)	Eukaryota_unclassified(100)	Eukaryota_unclassified(100)	Eukaryota_unclassified(100)
Otu1428	6	Eukaryota(100)	Alveolata(100)	Dinoflagellata(100)	Dinophyceae(100)	Dinophyceae_unclassified(100)	Dinophyceae_unclassified(100)	Dinophyceae_unclassified(100)	Dinophyceae_unclassified(100)
Otu1429	6	Eukaryota(100)	Eukaryota_unclassified(100)	Eukaryota_unclassified(100)	Eukaryota_unclassified(100)	Eukaryota_unclassified(100)	Eukaryota_unclassified(100)	Eukaryota_unclassified(100)	Eukaryota_unclassified(100)
Otu1430	6	Eukaryota(100)	Eukaryota_unclassified(100)	Eukaryota_unclassified(100)	Eukaryota_unclassified(100)	Eukaryota_unclassified(100)	Eukaryota_unclassified(100)	Eukaryota_unclassified(100)	Eukaryota_unclassified(100)
Otu1431	6	Eukaryota(100)	Eukaryota_unclassified(100)	Eukaryota_unclassified(100)	Eukaryota_unclassified(100)	Eukaryota_unclassified(100)	Eukaryota_unclassified(100)	Eukaryota_unclassified(100)	Eukaryota_unclassified(100)
Otu1432	6	Eukaryota(100)	Archaeplastida(100)	Chlorophyta(100)	Pyramimonadales(100)	Pyramimonadales_X(100)	Pyramimonadales_XX(100)	Pyramimonadales_XX_unclassified(100)	Pyramimonadales_XX_unclassified(100)
Otu1433	6	Eukaryota(100)	Alveolata(100)	Dinoflagellata(100)	Dinophyceae(100)	Gonyaulacales(100)	Goniodomataceae(100)	Alexandrium(100)	Alexandrium_unclassified(100)
Otu1434	6	Eukaryota(100)	Archaeplastida(100)	Chlorophyta(100)	Trebouxiophyceae(100)	Prasiolales(100)	Prasiolales_X(100)	Elliptochloris(100)	Elliptochloris_unclassified(100)
Otu1435	6	Eukaryota(100)	Eukaryota_unclassified(100)	Eukaryota_unclassified(100)	Eukaryota_unclassified(100)	Eukaryota_unclassified(100)	Eukaryota_unclassified(100)	Eukaryota_unclassified(100)	Eukaryota_unclassified(100)
Otu1436	6	Eukaryota(100)	Opisthokonta(100)	Metazoa(100)	Mollusca(100)	Cephalopoda(100)	Cephalopoda_X(100)	Cephalopoda_X_unclassified(100)	Cephalopoda_X_unclassified(100)
Otu1437	6	Eukaryota(100)	Eukaryota_unclassified(100)	Eukaryota_unclassified(100)	Eukaryota_unclassified(100)	Eukaryota_unclassified(100)	Eukaryota_unclassified(100)	Eukaryota_unclassified(100)	Eukaryota_unclassified(100)
Otu1438	6	Eukaryota(100)	Opisthokonta(100)	Metazoa(100)	Craniata(100)	Craniata_X(100)	Craniata_X_unclassified(100)	Craniata_X_unclassified(100)	Craniata_X_unclassified(100)
Otu1439	6	Eukaryota(100)	Opisthokonta(100)	Opisthokonta_unclassified(100)	Opisthokonta_unclassified(100)	Opisthokonta_unclassified(100)	Opisthokonta_unclassified(100)	Opisthokonta_unclassified(100)	Opisthokonta_unclassified(100)
Otu1440	6	Eukaryota(100)	Eukaryota_unclassified(100)	Eukaryota_unclassified(100)	Eukaryota_unclassified(100)	Eukaryota_unclassified(100)	Eukaryota_unclassified(100)	Eukaryota_unclassified(100)	Eukaryota_unclassified(100)
Otu1441	6	Eukaryota(100)	Opisthokonta(100)	Metazoa(100)	Acanthocephala(100)	Acanthocephala_X(100)	Acanthocephala_XX(100)	Acanthocephala_XX_unclassified(100)	Acanthocephala_XX_unclassified(100)
Otu1442	6	Eukaryota(100)	Archaeplastida(100)	Archaeplastida_unclassified(100)	Archaeplastida_unclassified(100)	Archaeplastida_unclassified(100)	Archaeplastida_unclassified(100)	Archaeplastida_unclassified(100)	Archaeplastida_unclassified(100)
Otu1443	6	Eukaryota(100)	Eukaryota_unclassified(100)	Eukaryota_unclassified(100)	Eukaryota_unclassified(100)	Eukaryota_unclassified(100)	Eukaryota_unclassified(100)	Eukaryota_unclassified(100)	Eukaryota_unclassified(100)
Otu1444	6	Eukaryota(100)	Opisthokonta(100)	Fungi(100)	Basidiomycota(100)	Agaricomycotina(100)	Agaricomycetes(100)	Agaricomycetes_unclassified(100)	Agaricomycetes_unclassified(100)
Otu1445	6	Eukaryota(100)	Eukaryota_unclassified(100)	Eukaryota_unclassified(100)	Eukaryota_unclassified(100)	Eukaryota_unclassified(100)	Eukaryota_unclassified(100)	Eukaryota_unclassified(100)	Eukaryota_unclassified(100)
Otu1446	6	Eukaryota(100)	Opisthokonta(84)	Metazoa(84)	Nematoda(84)	Chromadorea(84)	Chromadorea_X(84)	Strongyloides(84)	Strongyloides_unclassified(84)
Otu1447	6	Eukaryota(100)	Eukaryota_unclassified(100)	Eukaryota_unclassified(100)	Eukaryota_unclassified(100)	Eukaryota_unclassified(100)	Eukaryota_unclassified(100)	Eukaryota_unclassified(100)	Eukaryota_unclassified(100)
Otu1448	6	Eukaryota(100)	Eukaryota_unclassified(100)	Eukaryota_unclassified(100)	Eukaryota_unclassified(100)	Eukaryota_unclassified(100)	Eukaryota_unclassified(100)	Eukaryota_unclassified(100)	Eukaryota_unclassified(100)
Otu1449	6	Eukaryota(100)	Opisthokonta(100)	Metazoa(100)	Acanthocephala(100)	Acanthocephala_X(100)	Acanthocephala_XX(100)	Corynosoma(100)	Corynosoma_unclassified(100)
Otu1450	6	Eukaryota(100)	Eukaryota_unclassified(100)	Eukaryota_unclassified(100)	Eukaryota_unclassified(100)	Eukaryota_unclassified(100)	Eukaryota_unclassified(100)	Eukaryota_unclassified(100)	Eukaryota_unclassified(100)
Otu1451	6	Eukaryota(100)	Opisthokonta(100)	Metazoa(100)	Mollusca(100)	Gastropoda(100)	Caenogastropoda(100)	Caenogastropoda_unclassified(100)	Caenogastropoda_unclassified(100)
Otu1452	6	Eukaryota(100)	Eukaryota_unclassified(100)	Eukaryota_unclassified(100)	Eukaryota_unclassified(100)	Eukaryota_unclassified(100)	Eukaryota_unclassified(100)	Eukaryota_unclassified(100)	Eukaryota_unclassified(100)
Otu1453	5	Eukaryota(100)	Rhizaria(100)	Cercozoa(100)	Endomyxa(100)	Vampyrellida(100)	Vampyrellida_unclassified(100)	Vampyrellida_unclassified(100)	Vampyrellida_unclassified(100)
Otu1454	5	Eukaryota(100)	Eukaryota_unclassified(100)	Eukaryota_unclassified(100)	Eukaryota_unclassified(100)	Eukaryota_unclassified(100)	Eukaryota_unclassified(100)	Eukaryota_unclassified(100)	Eukaryota_unclassified(100)
Otu1455	5	Eukaryota(100)	Eukaryota_unclassified(100)	Eukaryota_unclassified(100)	Eukaryota_unclassified(100)	Eukaryota_unclassified(100)	Eukaryota_unclassified(100)	Eukaryota_unclassified(100)	Eukaryota_unclassified(100)
Otu1456	5	Eukaryota(100)	Eukaryota_unclassified(100)	Eukaryota_unclassified(100)	Eukaryota_unclassified(100)	Eukaryota_unclassified(100)	Eukaryota_unclassified(100)	Eukaryota_unclassified(100)	Eukaryota_unclassified(100)
Otu1457	5	Eukaryota(100)	Eukaryota_unclassified(100)	Eukaryota_unclassified(100)	Eukaryota_unclassified(100)	Eukaryota_unclassified(100)	Eukaryota_unclassified(100)	Eukaryota_unclassified(100)	Eukaryota_unclassified(100)
Otu1458	5	Eukaryota(100)	Eukaryota_unclassified(100)	Eukaryota_unclassified(100)	Eukaryota_unclassified(100)	Eukaryota_unclassified(100)	Eukaryota_unclassified(100)	Eukaryota_unclassified(100)	Eukaryota_unclassified(100)
Otu1459	5	Eukaryota(100)	Opisthokonta(100)	Metazoa(100)	Craniata(100)	Craniata_X(100)	Craniata_X_unclassified(100)	Craniata_X_unclassified(100)	Craniata_X_unclassified(100)
Otu1460	5	Eukaryota(100)	Eukaryota_unclassified(100)	Eukaryota_unclassified(100)	Eukaryota_unclassified(100)	Eukaryota_unclassified(100)	Eukaryota_unclassified(100)	Eukaryota_unclassified(100)	Eukaryota_unclassified(100)
Otu1461	5	Eukaryota(100)	Stramenopiles(100)	Stramenopiles_unclassified(100)	Stramenopiles_unclassified(100)	Stramenopiles_unclassified(100)	Stramenopiles_unclassified(100)	Stramenopiles_unclassified(100)	Stramenopiles_unclassified(100)
Otu1462	5	Eukaryota(100)	Eukaryota_unclassified(100)	Eukaryota_unclassified(100)	Eukaryota_unclassified(100)	Eukaryota_unclassified(100)	Eukaryota_unclassified(100)	Eukaryota_unclassified(100)	Eukaryota_unclassified(100)
Otu1463	5	Eukaryota(100)	Eukaryota_unclassified(100)	Eukaryota_unclassified(100)	Eukaryota_unclassified(100)	Eukaryota_unclassified(100)	Eukaryota_unclassified(100)	Eukaryota_unclassified(100)	Eukaryota_unclassified(100)
Otu1464	5	Eukaryota(100)	Eukaryota_unclassified(100)	Eukaryota_unclassified(100)	Eukaryota_unclassified(100)	Eukaryota_unclassified(100)	Eukaryota_unclassified(100)	Eukaryota_unclassified(100)	Eukaryota_unclassified(100)
Otu1465	5	Eukaryota(100)	Opisthokonta(100)	Opisthokonta_unclassified(100)	Opisthokonta_unclassified(100)	Opisthokonta_unclassified(100)	Opisthokonta_unclassified(100)	Opisthokonta_unclassified(100)	Opisthokonta_unclassified(100)
Otu1466	5	Eukaryota(100)	Eukaryota_unclassified(100)	Eukaryota_unclassified(100)	Eukaryota_unclassified(100)	Eukaryota_unclassified(100)	Eukaryota_unclassified(100)	Eukaryota_unclassified(100)	Eukaryota_unclassified(100)
Otu1467	5	Eukaryota(100)	Alveolata(100)	Ciliophora(100)	Spirotrichea(100)	Strombidiida_G(100)	Strombidiida_G_X(100)	Strombidiida_G_XX(100)	Strombidiida_G_XX_sp.(100)
Otu1468	5	Eukaryota(100)	Eukaryota_unclassified(100)	Eukaryota_unclassified(100)	Eukaryota_unclassified(100)	Eukaryota_unclassified(100)	Eukaryota_unclassified(100)	Eukaryota_unclassified(100)	Eukaryota_unclassified(100)
Otu1469	5	Eukaryota(100)	Stramenopiles(100)	Ochrophyta(100)	Bacillariophyta(100)	Bacillariophyta_X(100)	Bacillariophyta_X_unclassified(100)	Bacillariophyta_X_unclassified(100)	Bacillariophyta_X_unclassified(100)
Otu1470	5	Eukaryota(100)	Opisthokonta(100)	Metazoa(100)	Metazoa_unclassified(100)	Metazoa_unclassified(100)	Metazoa_unclassified(100)	Metazoa_unclassified(100)	Metazoa_unclassified(100)
Otu1471	5	Eukaryota(100)	Stramenopiles(100)	Ochrophyta(100)	Bacillariophyta(100)	Bacillariophyta_X(100)	Polar-centric-Mediophyceae(100)	Polar-centric-Mediophyceae_unclassified(80)	Polar-centric-Mediophyceae_unclassified(80)
Otu1472	5	Eukaryota(100)	Archaeplastida(100)	Chlorophyta(100)	Mamiellophyceae(100)	Dolichomastigales(100)	Crustomastigaceae(100)	Crustomastix(100)	Crustomastix_didyma(80)
Otu1473	5	Eukaryota(100)	Stramenopiles(100)	Ochrophyta(100)	Ochrophyta_unclassified(100)	Ochrophyta_unclassified(100)	Ochrophyta_unclassified(100)	Ochrophyta_unclassified(100)	Ochrophyta_unclassified(100)
Otu1474	5	Eukaryota(100)	Rhizaria(100)	Cercozoa(100)	Filosa-Thecofilosea(100)	Cryomonadida(100)	Protaspa-lineage(100)	Protaspa(100)	Protaspa_unclassified(100)
Otu1475	5	Eukaryota(100)	Opisthokonta(100)	Fungi(100)	Basidiomycota(100)	Agaricomycotina(100)	Tremellomycetes(100)	Dioszegia(100)	Dioszegia_sp.(100)
Otu1476	5	Eukaryota(100)	Alveolata(100)	Dinoflagellata(100)	Dinophyceae(100)	Gonyaulacales(100)	Goniodomataceae(100)	Alexandrium(100)	Alexandrium_unclassified(61)
Otu1477	5	Eukaryota(100)	Alveolata(100)	Dinoflagellata(100)	Dinophyceae(100)	Gonyaulacales(100)	Goniodomataceae(100)	Alexandrium(100)	Alexandrium_unclassified(100)
Otu1478	5	Eukaryota(100)	Eukaryota_unclassified(100)	Eukaryota_unclassified(100)	Eukaryota_unclassified(100)	Eukaryota_unclassified(100)	Eukaryota_unclassified(100)	Eukaryota_unclassified(100)	Eukaryota_unclassified(100)
Otu1479	5	Eukaryota(100)	Eukaryota_unclassified(100)	Eukaryota_unclassified(100)	Eukaryota_unclassified(100)	Eukaryota_unclassified(100)	Eukaryota_unclassified(100)	Eukaryota_unclassified(100)	Eukaryota_unclassified(100)
Otu1480	5	Eukaryota(100)	Rhizaria(100)	Cercozoa(100)	Filosa-Thecofilosea(100)	Ventricleftida(100)	Ventricleftida_X(100)	Ventricleftida_XX(100)	Ventricleftida_XX_sp.(100)
Otu1481	5	Eukaryota(100)	Eukaryota_unclassified(100)	Eukaryota_unclassified(100)	Eukaryota_unclassified(100)	Eukaryota_unclassified(100)	Eukaryota_unclassified(100)	Eukaryota_unclassified(100)	Eukaryota_unclassified(100)
Otu1482	5	Eukaryota(100)	Eukaryota_unclassified(100)	Eukaryota_unclassified(100)	Eukaryota_unclassified(100)	Eukaryota_unclassified(100)	Eukaryota_unclassified(100)	Eukaryota_unclassified(100)	Eukaryota_unclassified(100)
Otu1483	5	Eukaryota(100)	Eukaryota_unclassified(100)	Eukaryota_unclassified(100)	Eukaryota_unclassified(100)	Eukaryota_unclassified(100)	Eukaryota_unclassified(100)	Eukaryota_unclassified(100)	Eukaryota_unclassified(100)
Otu1484	5	Eukaryota(100)	Rhizaria(100)	Cercozoa(100)	Filosa-Thecofilosea(100)	Cryomonadida(100)	Protaspa-lineage(100)	Protaspa(100)	Protaspa_unclassified(100)
Otu1485	5	Eukaryota(100)	Eukaryota_unclassified(100)	Eukaryota_unclassified(100)	Eukaryota_unclassified(100)	Eukaryota_unclassified(100)	Eukaryota_unclassified(100)	Eukaryota_unclassified(100)	Eukaryota_unclassified(100)
Otu1486	5	Eukaryota(100)	Eukaryota_unclassified(100)	Eukaryota_unclassified(100)	Eukaryota_unclassified(100)	Eukaryota_unclassified(100)	Eukaryota_unclassified(100)	Eukaryota_unclassified(100)	Eukaryota_unclassified(100)
Otu1487	5	Eukaryota(100)	Eukaryota_unclassified(100)	Eukaryota_unclassified(100)	Eukaryota_unclassified(100)	Eukaryota_unclassified(100)	Eukaryota_unclassified(100)	Eukaryota_unclassified(100)	Eukaryota_unclassified(100)
Otu1488	5	Eukaryota(100)	Eukaryota_unclassified(100)	Eukaryota_unclassified(100)	Eukaryota_unclassified(100)	Eukaryota_unclassified(100)	Eukaryota_unclassified(100)	Eukaryota_unclassified(100)	Eukaryota_unclassified(100)
Otu1489	5	Eukaryota(100)	Rhizaria(100)	Cercozoa(100)	Filosa-Thecofilosea(100)	Ebriida(100)	TAGIRI1-lineage(100)	TAGIRI1-lineage_X(100)	TAGIRI1-lineage_X_sp.(100)
Otu1490	5	Eukaryota(100)	Eukaryota_unclassified(100)	Eukaryota_unclassified(100)	Eukaryota_unclassified(100)	Eukaryota_unclassified(100)	Eukaryota_unclassified(100)	Eukaryota_unclassified(100)	Eukaryota_unclassified(100)
Otu1491	5	Eukaryota(100)	Alveolata(100)	Dinoflagellata(100)	Dinophyceae(100)	Gymnodiniales(100)	Gymnodiniaceae(100)	Gymnodiniaceae_unclassified(100)	Gymnodiniaceae_unclassified(100)
Otu1492	5	Eukaryota(100)	Eukaryota_unclassified(100)	Eukaryota_unclassified(100)	Eukaryota_unclassified(100)	Eukaryota_unclassified(100)	Eukaryota_unclassified(100)	Eukaryota_unclassified(100)	Eukaryota_unclassified(100)
Otu1493	5	Eukaryota(100)	Opisthokonta(100)	Metazoa(100)	Mollusca(100)	Gastropoda(100)	Nudibranchia(100)	Nudibranchia_unclassified(100)	Nudibranchia_unclassified(100)
Otu1494	5	Eukaryota(100)	Eukaryota_unclassified(100)	Eukaryota_unclassified(100)	Eukaryota_unclassified(100)	Eukaryota_unclassified(100)	Eukaryota_unclassified(100)	Eukaryota_unclassified(100)	Eukaryota_unclassified(100)
Otu1495	5	Eukaryota(100)	Stramenopiles(100)	Stramenopiles_unclassified(100)	Stramenopiles_unclassified(100)	Stramenopiles_unclassified(100)	Stramenopiles_unclassified(100)	Stramenopiles_unclassified(100)	Stramenopiles_unclassified(100)
Otu1496	5	Eukaryota(100)	Eukaryota_unclassified(100)	Eukaryota_unclassified(100)	Eukaryota_unclassified(100)	Eukaryota_unclassified(100)	Eukaryota_unclassified(100)	Eukaryota_unclassified(100)	Eukaryota_unclassified(100)
Otu1497	5	Eukaryota(100)	Alveolata(100)	Dinoflagellata(100)	Dinophyceae(100)	Gymnodiniales(100)	Gymnodiniaceae(100)	Gymnodiniaceae_unclassified(100)	Gymnodiniaceae_unclassified(100)
Otu1498	5	Eukaryota(100)	Alveolata(100)	Dinoflagellata(100)	Dinophyceae(100)	Gonyaulacales(100)	Goniodomataceae(100)	Alexandrium(100)	Alexandrium_unclassified(80)
Otu1499	5	Eukaryota(100)	Eukaryota_unclassified(100)	Eukaryota_unclassified(100)	Eukaryota_unclassified(100)	Eukaryota_unclassified(100)	Eukaryota_unclassified(100)	Eukaryota_unclassified(100)	Eukaryota_unclassified(100)
Otu1500	5	Eukaryota(100)	Opisthokonta(100)	Fungi(100)	Ascomycota(100)	Pezizomycotina(100)	Pezizomycotina_unclassified(100)	Pezizomycotina_unclassified(100)	Pezizomycotina_unclassified(100)
Otu1501	5	Eukaryota(100)	Alveolata(100)	Dinoflagellata(100)	Dinophyceae(100)	Peridiniales(100)	Protoperidiniaceae(100)	Protoperidinium(100)	Protoperidinium_punctulatum(100)
Otu1502	5	Eukaryota(100)	Opisthokonta(100)	Metazoa(100)	Mollusca(100)	Gastropoda(100)	Gastropoda_unclassified(100)	Gastropoda_unclassified(100)	Gastropoda_unclassified(100)
Otu1503	5	Eukaryota(100)	Eukaryota_unclassified(100)	Eukaryota_unclassified(100)	Eukaryota_unclassified(100)	Eukaryota_unclassified(100)	Eukaryota_unclassified(100)	Eukaryota_unclassified(100)	Eukaryota_unclassified(100)
Otu1504	5	Eukaryota(100)	Eukaryota_unclassified(100)	Eukaryota_unclassified(100)	Eukaryota_unclassified(100)	Eukaryota_unclassified(100)	Eukaryota_unclassified(100)	Eukaryota_unclassified(100)	Eukaryota_unclassified(100)
Otu1505	5	Eukaryota(100)	Eukaryota_unclassified(100)	Eukaryota_unclassified(100)	Eukaryota_unclassified(100)	Eukaryota_unclassified(100)	Eukaryota_unclassified(100)	Eukaryota_unclassified(100)	Eukaryota_unclassified(100)
Otu1506	5	Eukaryota(100)	Opisthokonta(100)	Metazoa(100)	Annelida(100)	Annelida_X(100)	Annelida_XX(100)	Annelida_XX_unclassified(100)	Annelida_XX_unclassified(100)
Otu1507	5	Eukaryota(100)	Eukaryota_unclassified(100)	Eukaryota_unclassified(100)	Eukaryota_unclassified(100)	Eukaryota_unclassified(100)	Eukaryota_unclassified(100)	Eukaryota_unclassified(100)	Eukaryota_unclassified(100)
Otu1508	5	Eukaryota(100)	Eukaryota_unclassified(100)	Eukaryota_unclassified(100)	Eukaryota_unclassified(100)	Eukaryota_unclassified(100)	Eukaryota_unclassified(100)	Eukaryota_unclassified(100)	Eukaryota_unclassified(100)
Otu1509	5	Eukaryota(100)	Eukaryota_unclassified(100)	Eukaryota_unclassified(100)	Eukaryota_unclassified(100)	Eukaryota_unclassified(100)	Eukaryota_unclassified(100)	Eukaryota_unclassified(100)	Eukaryota_unclassified(100)
Otu1510	5	Eukaryota(100)	Eukaryota_unclassified(100)	Eukaryota_unclassified(100)	Eukaryota_unclassified(100)	Eukaryota_unclassified(100)	Eukaryota_unclassified(100)	Eukaryota_unclassified(100)	Eukaryota_unclassified(100)
Otu1511	5	Eukaryota(100)	Opisthokonta(100)	Metazoa(100)	Mollusca(100)	Gastropoda(100)	Nudibranchia(100)	Nudibranchia_unclassified(100)	Nudibranchia_unclassified(100)
Otu1512	5	Eukaryota(100)	Eukaryota_unclassified(100)	Eukaryota_unclassified(100)	Eukaryota_unclassified(100)	Eukaryota_unclassified(100)	Eukaryota_unclassified(100)	Eukaryota_unclassified(100)	Eukaryota_unclassified(100)
Otu1513	5	Eukaryota(100)	Opisthokonta(100)	Metazoa(100)	Mollusca(100)	Gastropoda(100)	Nudibranchia(100)	Nudibranchia_unclassified(100)	Nudibranchia_unclassified(100)
Otu1514	5	Eukaryota(100)	Eukaryota_unclassified(100)	Eukaryota_unclassified(100)	Eukaryota_unclassified(100)	Eukaryota_unclassified(100)	Eukaryota_unclassified(100)	Eukaryota_unclassified(100)	Eukaryota_unclassified(100)
Otu1515	5	Eukaryota(100)	Eukaryota_unclassified(100)	Eukaryota_unclassified(100)	Eukaryota_unclassified(100)	Eukaryota_unclassified(100)	Eukaryota_unclassified(100)	Eukaryota_unclassified(100)	Eukaryota_unclassified(100)
Otu1516	5	Eukaryota(100)	Stramenopiles(100)	Pseudofungi(100)	Oomycota(100)	Oomycota_X(100)	Oomycota_XX(100)	Oomycota_XXX(100)	Oomycota_XXX_sp.(100)
Otu1517	5	Eukaryota(100)	Archaeplastida(100)	Chlorophyta(100)	Mamiellophyceae(61)	Mamiellophyceae_unclassified(61)	Mamiellophyceae_unclassified(61)	Mamiellophyceae_unclassified(61)	Mamiellophyceae_unclassified(61)
Otu1518	5	Eukaryota(100)	Eukaryota_unclassified(100)	Eukaryota_unclassified(100)	Eukaryota_unclassified(100)	Eukaryota_unclassified(100)	Eukaryota_unclassified(100)	Eukaryota_unclassified(100)	Eukaryota_unclassified(100)
Otu1519	5	Eukaryota(100)	Eukaryota_unclassified(100)	Eukaryota_unclassified(100)	Eukaryota_unclassified(100)	Eukaryota_unclassified(100)	Eukaryota_unclassified(100)	Eukaryota_unclassified(100)	Eukaryota_unclassified(100)
Otu1520	5	Eukaryota(100)	Eukaryota_unclassified(100)	Eukaryota_unclassified(100)	Eukaryota_unclassified(100)	Eukaryota_unclassified(100)	Eukaryota_unclassified(100)	Eukaryota_unclassified(100)	Eukaryota_unclassified(100)
Otu1521	5	Eukaryota(100)	Archaeplastida(100)	Chlorophyta(100)	Chlorophyceae(100)	Chlamydomonadales(100)	Coccomyxaceae(100)	Coccomyxa(100)	Coccomyxa_sp.(100)
Otu1522	5	Eukaryota(100)	Alveolata(100)	Dinoflagellata(100)	Dinophyceae(100)	Gymnodiniales(100)	Gymnodiniaceae(100)	Gymnodiniaceae_unclassified(100)	Gymnodiniaceae_unclassified(100)
Otu1523	5	Eukaryota(100)	Stramenopiles(100)	Ochrophyta(100)	Dictyochophyceae(100)	Dictyochophyceae_X(100)	Pedinellales(100)	Pteridomonas(100)	Pteridomonas_danica(100)
Otu1524	5	Eukaryota(100)	Eukaryota_unclassified(100)	Eukaryota_unclassified(100)	Eukaryota_unclassified(100)	Eukaryota_unclassified(100)	Eukaryota_unclassified(100)	Eukaryota_unclassified(100)	Eukaryota_unclassified(100)
Otu1525	5	Eukaryota(100)	Opisthokonta(100)	Metazoa(100)	Platyhelminthes(100)	Trematoda(100)	Digenea(100)	Digenea_unclassified(100)	Digenea_unclassified(100)
Otu1526	5	Eukaryota(100)	Eukaryota_unclassified(100)	Eukaryota_unclassified(100)	Eukaryota_unclassified(100)	Eukaryota_unclassified(100)	Eukaryota_unclassified(100)	Eukaryota_unclassified(100)	Eukaryota_unclassified(100)
Otu1527	5	Eukaryota(100)	Rhizaria(100)	Cercozoa(100)	Filosa-Thecofilosea(100)	Ebriida(100)	Ebriida_unclassified(100)	Ebriida_unclassified(100)	Ebriida_unclassified(100)
Otu1528	5	Eukaryota(100)	Opisthokonta(100)	Metazoa(100)	Metazoa_unclassified(100)	Metazoa_unclassified(100)	Metazoa_unclassified(100)	Metazoa_unclassified(100)	Metazoa_unclassified(100)
Otu1529	5	Eukaryota(100)	Eukaryota_unclassified(100)	Eukaryota_unclassified(100)	Eukaryota_unclassified(100)	Eukaryota_unclassified(100)	Eukaryota_unclassified(100)	Eukaryota_unclassified(100)	Eukaryota_unclassified(100)
Otu1530	5	Eukaryota(100)	Opisthokonta(100)	Metazoa(100)	Platyhelminthes(100)	Cestoda(100)	Eucestoda(100)	Diphyllobothrium(100)	Diphyllobothrium_unclassified(100)
Otu1531	5	Eukaryota(100)	Alveolata(100)	Ciliophora(100)	Spirotrichea(100)	Spirotrichea_unclassified(61)	Spirotrichea_unclassified(61)	Spirotrichea_unclassified(61)	Spirotrichea_unclassified(61)
Otu1532	5	Eukaryota(100)	Eukaryota_unclassified(100)	Eukaryota_unclassified(100)	Eukaryota_unclassified(100)	Eukaryota_unclassified(100)	Eukaryota_unclassified(100)	Eukaryota_unclassified(100)	Eukaryota_unclassified(100)
Otu1533	5	Eukaryota(100)	Eukaryota_unclassified(100)	Eukaryota_unclassified(100)	Eukaryota_unclassified(100)	Eukaryota_unclassified(100)	Eukaryota_unclassified(100)	Eukaryota_unclassified(100)	Eukaryota_unclassified(100)
Otu1534	5	Eukaryota(100)	Rhizaria(100)	Cercozoa(100)	Filosa-Imbricatea(100)	Thaumatomonadida(100)	Thaumatomonadidae(100)	Reckertia(100)	Reckertia_filosa(100)
Otu1535	5	Eukaryota(100)	Opisthokonta(100)	Metazoa(100)	Acanthocephala(100)	Acanthocephala_X(100)	Acanthocephala_XX(100)	Acanthocephala_XX_unclassified(100)	Acanthocephala_XX_unclassified(100)
Otu1536	5	Eukaryota(100)	Eukaryota_unclassified(100)	Eukaryota_unclassified(100)	Eukaryota_unclassified(100)	Eukaryota_unclassified(100)	Eukaryota_unclassified(100)	Eukaryota_unclassified(100)	Eukaryota_unclassified(100)
Otu1537	5	Eukaryota(100)	Eukaryota_unclassified(100)	Eukaryota_unclassified(100)	Eukaryota_unclassified(100)	Eukaryota_unclassified(100)	Eukaryota_unclassified(100)	Eukaryota_unclassified(100)	Eukaryota_unclassified(100)
Otu1538	5	Eukaryota(100)	Eukaryota_unclassified(100)	Eukaryota_unclassified(100)	Eukaryota_unclassified(100)	Eukaryota_unclassified(100)	Eukaryota_unclassified(100)	Eukaryota_unclassified(100)	Eukaryota_unclassified(100)
Otu1539	5	Eukaryota(100)	Eukaryota_unclassified(100)	Eukaryota_unclassified(100)	Eukaryota_unclassified(100)	Eukaryota_unclassified(100)	Eukaryota_unclassified(100)	Eukaryota_unclassified(100)	Eukaryota_unclassified(100)
Otu1540	5	Eukaryota(100)	Opisthokonta(100)	Opisthokonta_unclassified(100)	Opisthokonta_unclassified(100)	Opisthokonta_unclassified(100)	Opisthokonta_unclassified(100)	Opisthokonta_unclassified(100)	Opisthokonta_unclassified(100)
Otu1541	5	Eukaryota(100)	Eukaryota_unclassified(100)	Eukaryota_unclassified(100)	Eukaryota_unclassified(100)	Eukaryota_unclassified(100)	Eukaryota_unclassified(100)	Eukaryota_unclassified(100)	Eukaryota_unclassified(100)
Otu1542	5	Eukaryota(100)	Eukaryota_unclassified(100)	Eukaryota_unclassified(100)	Eukaryota_unclassified(100)	Eukaryota_unclassified(100)	Eukaryota_unclassified(100)	Eukaryota_unclassified(100)	Eukaryota_unclassified(100)
Otu1543	5	Eukaryota(100)	Opisthokonta(100)	Metazoa(100)	Craniata(100)	Craniata_X(100)	Craniata_X_unclassified(100)	Craniata_X_unclassified(100)	Craniata_X_unclassified(100)
Otu1544	5	Eukaryota(100)	Eukaryota_unclassified(100)	Eukaryota_unclassified(100)	Eukaryota_unclassified(100)	Eukaryota_unclassified(100)	Eukaryota_unclassified(100)	Eukaryota_unclassified(100)	Eukaryota_unclassified(100)
Otu1545	5	Eukaryota(100)	Eukaryota_unclassified(100)	Eukaryota_unclassified(100)	Eukaryota_unclassified(100)	Eukaryota_unclassified(100)	Eukaryota_unclassified(100)	Eukaryota_unclassified(100)	Eukaryota_unclassified(100)
Otu1546	5	Eukaryota(100)	Eukaryota_unclassified(100)	Eukaryota_unclassified(100)	Eukaryota_unclassified(100)	Eukaryota_unclassified(100)	Eukaryota_unclassified(100)	Eukaryota_unclassified(100)	Eukaryota_unclassified(100)
Otu1547	5	Eukaryota(100)	Stramenopiles(80)	Stramenopiles_unclassified(80)	Stramenopiles_unclassified(80)	Stramenopiles_unclassified(80)	Stramenopiles_unclassified(80)	Stramenopiles_unclassified(80)	Stramenopiles_unclassified(80)
Otu1548	5	Eukaryota(100)	Eukaryota_unclassified(100)	Eukaryota_unclassified(100)	Eukaryota_unclassified(100)	Eukaryota_unclassified(100)	Eukaryota_unclassified(100)	Eukaryota_unclassified(100)	Eukaryota_unclassified(100)
Otu1549	5	Eukaryota(100)	Eukaryota_unclassified(100)	Eukaryota_unclassified(100)	Eukaryota_unclassified(100)	Eukaryota_unclassified(100)	Eukaryota_unclassified(100)	Eukaryota_unclassified(100)	Eukaryota_unclassified(100)
Otu1550	5	Eukaryota(100)	Opisthokonta(100)	Metazoa(100)	Platyhelminthes(100)	Trematoda(100)	Digenea(100)	Digenea_unclassified(100)	Digenea_unclassified(100)
Otu1551	5	Eukaryota(100)	Eukaryota_unclassified(100)	Eukaryota_unclassified(100)	Eukaryota_unclassified(100)	Eukaryota_unclassified(100)	Eukaryota_unclassified(100)	Eukaryota_unclassified(100)	Eukaryota_unclassified(100)
Otu1552	5	Eukaryota(100)	Eukaryota_unclassified(100)	Eukaryota_unclassified(100)	Eukaryota_unclassified(100)	Eukaryota_unclassified(100)	Eukaryota_unclassified(100)	Eukaryota_unclassified(100)	Eukaryota_unclassified(100)
Otu1553	5	Eukaryota(100)	Eukaryota_unclassified(100)	Eukaryota_unclassified(100)	Eukaryota_unclassified(100)	Eukaryota_unclassified(100)	Eukaryota_unclassified(100)	Eukaryota_unclassified(100)	Eukaryota_unclassified(100)
Otu1554	5	Eukaryota(100)	Opisthokonta(100)	Metazoa(100)	Platyhelminthes(100)	Trematoda(100)	Digenea(100)	Digenea_unclassified(100)	Digenea_unclassified(100)
Otu1555	5	Eukaryota(100)	Eukaryota_unclassified(100)	Eukaryota_unclassified(100)	Eukaryota_unclassified(100)	Eukaryota_unclassified(100)	Eukaryota_unclassified(100)	Eukaryota_unclassified(100)	Eukaryota_unclassified(100)
Otu1556	5	Eukaryota(100)	Eukaryota_unclassified(100)	Eukaryota_unclassified(100)	Eukaryota_unclassified(100)	Eukaryota_unclassified(100)	Eukaryota_unclassified(100)	Eukaryota_unclassified(100)	Eukaryota_unclassified(100)
Otu1557	5	Eukaryota(100)	Eukaryota_unclassified(100)	Eukaryota_unclassified(100)	Eukaryota_unclassified(100)	Eukaryota_unclassified(100)	Eukaryota_unclassified(100)	Eukaryota_unclassified(100)	Eukaryota_unclassified(100)
Otu1558	5	Eukaryota(100)	Alveolata(100)	Ciliophora(100)	Oligohymenophorea(100)	Peritrichia_2(100)	Sessilida(100)	Vorticella(100)	Vorticella_gracilis(100)
Otu1559	5	Eukaryota(100)	Eukaryota_unclassified(100)	Eukaryota_unclassified(100)	Eukaryota_unclassified(100)	Eukaryota_unclassified(100)	Eukaryota_unclassified(100)	Eukaryota_unclassified(100)	Eukaryota_unclassified(100)
Otu1560	5	Eukaryota(100)	Eukaryota_unclassified(100)	Eukaryota_unclassified(100)	Eukaryota_unclassified(100)	Eukaryota_unclassified(100)	Eukaryota_unclassified(100)	Eukaryota_unclassified(100)	Eukaryota_unclassified(100)
Otu1561	5	Eukaryota(100)	Eukaryota_unclassified(100)	Eukaryota_unclassified(100)	Eukaryota_unclassified(100)	Eukaryota_unclassified(100)	Eukaryota_unclassified(100)	Eukaryota_unclassified(100)	Eukaryota_unclassified(100)
Otu1562	5	Eukaryota(100)	Eukaryota_unclassified(100)	Eukaryota_unclassified(100)	Eukaryota_unclassified(100)	Eukaryota_unclassified(100)	Eukaryota_unclassified(100)	Eukaryota_unclassified(100)	Eukaryota_unclassified(100)
Otu1563	5	Eukaryota(100)	Eukaryota_unclassified(100)	Eukaryota_unclassified(100)	Eukaryota_unclassified(100)	Eukaryota_unclassified(100)	Eukaryota_unclassified(100)	Eukaryota_unclassified(100)	Eukaryota_unclassified(100)
Otu1564	5	Eukaryota(100)	Archaeplastida(100)	Streptophyta(100)	Embryophyceae(100)	Embryophyceae_X(100)	Embryophyceae_XX(100)	Embryophyceae_XX_unclassified(100)	Embryophyceae_XX_unclassified(100)
Otu1565	5	Eukaryota(100)	Rhizaria(100)	Cercozoa(100)	Filosa-Imbricatea(100)	Thaumatomonadida(100)	Thaumatomonadida_unclassified(61)	Thaumatomonadida_unclassified(61)	Thaumatomonadida_unclassified(61)
Otu1566	5	Eukaryota(100)	Opisthokonta(100)	Metazoa(100)	Metazoa_unclassified(61)	Metazoa_unclassified(61)	Metazoa_unclassified(61)	Metazoa_unclassified(61)	Metazoa_unclassified(61)
Otu1567	5	Eukaryota(100)	Eukaryota_unclassified(100)	Eukaryota_unclassified(100)	Eukaryota_unclassified(100)	Eukaryota_unclassified(100)	Eukaryota_unclassified(100)	Eukaryota_unclassified(100)	Eukaryota_unclassified(100)
Otu1568	5	Eukaryota(100)	Opisthokonta(100)	Metazoa(100)	Acanthocephala(100)	Acanthocephala_X(100)	Acanthocephala_XX(100)	Acanthocephala_XX_unclassified(100)	Acanthocephala_XX_unclassified(100)
Otu1569	5	Eukaryota(100)	Eukaryota_unclassified(100)	Eukaryota_unclassified(100)	Eukaryota_unclassified(100)	Eukaryota_unclassified(100)	Eukaryota_unclassified(100)	Eukaryota_unclassified(100)	Eukaryota_unclassified(100)
Otu1570	5	Eukaryota(100)	Alveolata(100)	Dinoflagellata(100)	Dinophyceae(100)	Dinophyceae_unclassified(100)	Dinophyceae_unclassified(100)	Dinophyceae_unclassified(100)	Dinophyceae_unclassified(100)
Otu1571	5	Eukaryota(100)	Opisthokonta(100)	Metazoa(100)	Metazoa_unclassified(100)	Metazoa_unclassified(100)	Metazoa_unclassified(100)	Metazoa_unclassified(100)	Metazoa_unclassified(100)
Otu1572	5	Eukaryota(100)	Eukaryota_unclassified(100)	Eukaryota_unclassified(100)	Eukaryota_unclassified(100)	Eukaryota_unclassified(100)	Eukaryota_unclassified(100)	Eukaryota_unclassified(100)	Eukaryota_unclassified(100)
Otu1573	5	Eukaryota(100)	Eukaryota_unclassified(100)	Eukaryota_unclassified(100)	Eukaryota_unclassified(100)	Eukaryota_unclassified(100)	Eukaryota_unclassified(100)	Eukaryota_unclassified(100)	Eukaryota_unclassified(100)
Otu1574	5	Eukaryota(100)	Opisthokonta(100)	Metazoa(100)	Acanthocephala(100)	Acanthocephala_X(100)	Acanthocephala_XX(100)	Acanthocephala_XX_unclassified(100)	Acanthocephala_XX_unclassified(100)
Otu1575	5	Eukaryota(100)	Eukaryota_unclassified(100)	Eukaryota_unclassified(100)	Eukaryota_unclassified(100)	Eukaryota_unclassified(100)	Eukaryota_unclassified(100)	Eukaryota_unclassified(100)	Eukaryota_unclassified(100)
Otu1576	5	Eukaryota(100)	Alveolata(100)	Dinoflagellata(100)	Dinophyceae(100)	Gymnodiniales(100)	Gymnodiniales_unclassified(100)	Gymnodiniales_unclassified(100)	Gymnodiniales_unclassified(100)
Otu1577	5	Eukaryota(100)	Eukaryota_unclassified(100)	Eukaryota_unclassified(100)	Eukaryota_unclassified(100)	Eukaryota_unclassified(100)	Eukaryota_unclassified(100)	Eukaryota_unclassified(100)	Eukaryota_unclassified(100)
Otu1578	5	Eukaryota(100)	Alveolata(100)	Ciliophora(100)	Spirotrichea(100)	Spirotrichea_unclassified(61)	Spirotrichea_unclassified(61)	Spirotrichea_unclassified(61)	Spirotrichea_unclassified(61)
Otu1579	5	Eukaryota(100)	Eukaryota_unclassified(100)	Eukaryota_unclassified(100)	Eukaryota_unclassified(100)	Eukaryota_unclassified(100)	Eukaryota_unclassified(100)	Eukaryota_unclassified(100)	Eukaryota_unclassified(100)
Otu1580	5	Eukaryota(100)	Eukaryota_unclassified(100)	Eukaryota_unclassified(100)	Eukaryota_unclassified(100)	Eukaryota_unclassified(100)	Eukaryota_unclassified(100)	Eukaryota_unclassified(100)	Eukaryota_unclassified(100)
Otu1581	4	Eukaryota(100)	Eukaryota_unclassified(100)	Eukaryota_unclassified(100)	Eukaryota_unclassified(100)	Eukaryota_unclassified(100)	Eukaryota_unclassified(100)	Eukaryota_unclassified(100)	Eukaryota_unclassified(100)
Otu1582	4	Eukaryota(100)	Archaeplastida(100)	Archaeplastida_unclassified(100)	Archaeplastida_unclassified(100)	Archaeplastida_unclassified(100)	Archaeplastida_unclassified(100)	Archaeplastida_unclassified(100)	Archaeplastida_unclassified(100)
Otu1583	4	Eukaryota(100)	Opisthokonta(100)	Metazoa(100)	Platyhelminthes(100)	Trematoda(100)	Digenea(100)	Digenea_unclassified(100)	Digenea_unclassified(100)
Otu1584	4	Eukaryota(100)	Alveolata(100)	Dinoflagellata(100)	Dinophyceae(100)	Gonyaulacales(100)	Goniodomataceae(100)	Alexandrium(100)	Alexandrium_unclassified(100)
Otu1585	4	Eukaryota(100)	Eukaryota_unclassified(100)	Eukaryota_unclassified(100)	Eukaryota_unclassified(100)	Eukaryota_unclassified(100)	Eukaryota_unclassified(100)	Eukaryota_unclassified(100)	Eukaryota_unclassified(100)
Otu1586	4	Eukaryota(100)	Eukaryota_unclassified(100)	Eukaryota_unclassified(100)	Eukaryota_unclassified(100)	Eukaryota_unclassified(100)	Eukaryota_unclassified(100)	Eukaryota_unclassified(100)	Eukaryota_unclassified(100)
Otu1587	4	Eukaryota(100)	Archaeplastida(75)	Archaeplastida_unclassified(75)	Archaeplastida_unclassified(75)	Archaeplastida_unclassified(75)	Archaeplastida_unclassified(75)	Archaeplastida_unclassified(75)	Archaeplastida_unclassified(75)
Otu1588	4	Eukaryota(100)	Eukaryota_unclassified(75)	Eukaryota_unclassified(75)	Eukaryota_unclassified(75)	Eukaryota_unclassified(75)	Eukaryota_unclassified(75)	Eukaryota_unclassified(75)	Eukaryota_unclassified(75)
Otu1589	4	Eukaryota(100)	Eukaryota_unclassified(100)	Eukaryota_unclassified(100)	Eukaryota_unclassified(100)	Eukaryota_unclassified(100)	Eukaryota_unclassified(100)	Eukaryota_unclassified(100)	Eukaryota_unclassified(100)
Otu1590	4	Eukaryota(100)	Opisthokonta(100)	Metazoa(100)	Platyhelminthes(100)	Trematoda(100)	Digenea(100)	Digenea_unclassified(100)	Digenea_unclassified(100)
Otu1591	4	Eukaryota(100)	Stramenopiles(100)	Ochrophyta(100)	Ochrophyta_unclassified(100)	Ochrophyta_unclassified(100)	Ochrophyta_unclassified(100)	Ochrophyta_unclassified(100)	Ochrophyta_unclassified(100)
Otu1592	4	Eukaryota(100)	Rhizaria(100)	Cercozoa(100)	Filosa-Imbricatea(100)	Thaumatomonadida(100)	Thaumatomonadida_unclassified(100)	Thaumatomonadida_unclassified(100)	Thaumatomonadida_unclassified(100)
Otu1593	4	Eukaryota(100)	Eukaryota_unclassified(100)	Eukaryota_unclassified(100)	Eukaryota_unclassified(100)	Eukaryota_unclassified(100)	Eukaryota_unclassified(100)	Eukaryota_unclassified(100)	Eukaryota_unclassified(100)
Otu1594	4	Eukaryota(100)	Opisthokonta(100)	Fungi(100)	Ascomycota(100)	Pezizomycotina(100)	Pezizomycotina_unclassified(100)	Pezizomycotina_unclassified(100)	Pezizomycotina_unclassified(100)
Otu1595	4	Eukaryota(100)	Eukaryota_unclassified(100)	Eukaryota_unclassified(100)	Eukaryota_unclassified(100)	Eukaryota_unclassified(100)	Eukaryota_unclassified(100)	Eukaryota_unclassified(100)	Eukaryota_unclassified(100)
Otu1596	4	Eukaryota(100)	Alveolata(100)	Ciliophora(100)	Spirotrichea(100)	Strombidiida(100)	Strombidiida_unclassified(100)	Strombidiida_unclassified(100)	Strombidiida_unclassified(100)
Otu1597	4	Eukaryota(100)	Eukaryota_unclassified(100)	Eukaryota_unclassified(100)	Eukaryota_unclassified(100)	Eukaryota_unclassified(100)	Eukaryota_unclassified(100)	Eukaryota_unclassified(100)	Eukaryota_unclassified(100)
Otu1598	4	Eukaryota(100)	Eukaryota_unclassified(100)	Eukaryota_unclassified(100)	Eukaryota_unclassified(100)	Eukaryota_unclassified(100)	Eukaryota_unclassified(100)	Eukaryota_unclassified(100)	Eukaryota_unclassified(100)
Otu1599	4	Eukaryota(100)	Stramenopiles(100)	Ochrophyta(100)	Ochrophyta_unclassified(100)	Ochrophyta_unclassified(100)	Ochrophyta_unclassified(100)	Ochrophyta_unclassified(100)	Ochrophyta_unclassified(100)
Otu1600	4	Eukaryota(100)	Rhizaria(100)	Cercozoa(100)	Filosa-Thecofilosea(100)	Ebriida(100)	Ebriida_unclassified(75)	Ebriida_unclassified(75)	Ebriida_unclassified(75)
Otu1601	4	Eukaryota(100)	Eukaryota_unclassified(100)	Eukaryota_unclassified(100)	Eukaryota_unclassified(100)	Eukaryota_unclassified(100)	Eukaryota_unclassified(100)	Eukaryota_unclassified(100)	Eukaryota_unclassified(100)
Otu1602	4	Eukaryota(100)	Stramenopiles(100)	Ochrophyta(100)	Dictyochophyceae(100)	Dictyochophyceae_X(100)	Pedinellales(100)	Pedinellales_unclassified(100)	Pedinellales_unclassified(100)
Otu1603	4	Eukaryota(100)	Opisthokonta(100)	Metazoa(100)	Platyhelminthes(100)	Cestoda(100)	Eucestoda(100)	Diphyllobothrium(100)	Diphyllobothrium_unclassified(100)
Otu1604	4	Eukaryota(100)	Eukaryota_unclassified(100)	Eukaryota_unclassified(100)	Eukaryota_unclassified(100)	Eukaryota_unclassified(100)	Eukaryota_unclassified(100)	Eukaryota_unclassified(100)	Eukaryota_unclassified(100)
Otu1605	4	Eukaryota(100)	Eukaryota_unclassified(100)	Eukaryota_unclassified(100)	Eukaryota_unclassified(100)	Eukaryota_unclassified(100)	Eukaryota_unclassified(100)	Eukaryota_unclassified(100)	Eukaryota_unclassified(100)
Otu1606	4	Eukaryota(100)	Eukaryota_unclassified(100)	Eukaryota_unclassified(100)	Eukaryota_unclassified(100)	Eukaryota_unclassified(100)	Eukaryota_unclassified(100)	Eukaryota_unclassified(100)	Eukaryota_unclassified(100)
Otu1607	4	Eukaryota(100)	Opisthokonta(100)	Metazoa(100)	Mollusca(100)	Bivalvia(100)	Heteroconchia(100)	Heteroconchia_unclassified(100)	Heteroconchia_unclassified(100)
Otu1608	4	Eukaryota(100)	Rhizaria(100)	Cercozoa(100)	Cercozoa_unclassified(100)	Cercozoa_unclassified(100)	Cercozoa_unclassified(100)	Cercozoa_unclassified(100)	Cercozoa_unclassified(100)
Otu1609	4	Eukaryota(100)	Opisthokonta(100)	Metazoa(100)	Acanthocephala(100)	Acanthocephala_X(100)	Acanthocephala_XX(100)	Acanthocephala_XX_unclassified(100)	Acanthocephala_XX_unclassified(100)
Otu1610	4	Eukaryota(100)	Opisthokonta(100)	Metazoa(100)	Arthropoda(100)	Chelicerata(100)	Arachnida(100)	Demodex(100)	Demodex_brevis(100)
Otu1611	4	Eukaryota(100)	Eukaryota_unclassified(100)	Eukaryota_unclassified(100)	Eukaryota_unclassified(100)	Eukaryota_unclassified(100)	Eukaryota_unclassified(100)	Eukaryota_unclassified(100)	Eukaryota_unclassified(100)
Otu1612	4	Eukaryota(100)	Eukaryota_unclassified(100)	Eukaryota_unclassified(100)	Eukaryota_unclassified(100)	Eukaryota_unclassified(100)	Eukaryota_unclassified(100)	Eukaryota_unclassified(100)	Eukaryota_unclassified(100)
Otu1613	4	Eukaryota(100)	Eukaryota_unclassified(100)	Eukaryota_unclassified(100)	Eukaryota_unclassified(100)	Eukaryota_unclassified(100)	Eukaryota_unclassified(100)	Eukaryota_unclassified(100)	Eukaryota_unclassified(100)
Otu1614	4	Eukaryota(100)	Eukaryota_unclassified(100)	Eukaryota_unclassified(100)	Eukaryota_unclassified(100)	Eukaryota_unclassified(100)	Eukaryota_unclassified(100)	Eukaryota_unclassified(100)	Eukaryota_unclassified(100)
Otu1615	4	Eukaryota(100)	Alveolata(100)	Dinoflagellata(100)	Dinophyceae(100)	Gonyaulacales(100)	Goniodomataceae(100)	Alexandrium(100)	Alexandrium_unclassified(100)
Otu1616	4	Eukaryota(100)	Eukaryota_unclassified(100)	Eukaryota_unclassified(100)	Eukaryota_unclassified(100)	Eukaryota_unclassified(100)	Eukaryota_unclassified(100)	Eukaryota_unclassified(100)	Eukaryota_unclassified(100)
Otu1617	4	Eukaryota(100)	Opisthokonta(100)	Metazoa(100)	Acanthocephala(100)	Acanthocephala_X(100)	Acanthocephala_XX(100)	Corynosoma(75)	Corynosoma_unclassified(75)
Otu1618	4	Eukaryota(100)	Eukaryota_unclassified(100)	Eukaryota_unclassified(100)	Eukaryota_unclassified(100)	Eukaryota_unclassified(100)	Eukaryota_unclassified(100)	Eukaryota_unclassified(100)	Eukaryota_unclassified(100)
Otu1619	4	Eukaryota(100)	Stramenopiles(100)	Stramenopiles_unclassified(100)	Stramenopiles_unclassified(100)	Stramenopiles_unclassified(100)	Stramenopiles_unclassified(100)	Stramenopiles_unclassified(100)	Stramenopiles_unclassified(100)
Otu1620	4	Eukaryota(100)	Alveolata(100)	Dinoflagellata(100)	Dinophyceae(100)	Peridiniales(100)	Protoperidiniaceae(100)	Protoperidinium(100)	Protoperidinium_punctulatum(100)
Otu1621	4	Eukaryota(100)	Eukaryota_unclassified(100)	Eukaryota_unclassified(100)	Eukaryota_unclassified(100)	Eukaryota_unclassified(100)	Eukaryota_unclassified(100)	Eukaryota_unclassified(100)	Eukaryota_unclassified(100)
Otu1622	4	Eukaryota(100)	Opisthokonta(100)	Metazoa(100)	Myxozoa(100)	Myxozoa_X(100)	Myxosporea(100)	Ortholinea(75)	Ortholinea_orientalis(75)
Otu1623	4	Eukaryota(100)	Eukaryota_unclassified(100)	Eukaryota_unclassified(100)	Eukaryota_unclassified(100)	Eukaryota_unclassified(100)	Eukaryota_unclassified(100)	Eukaryota_unclassified(100)	Eukaryota_unclassified(100)
Otu1624	4	Eukaryota(100)	Opisthokonta(100)	Metazoa(100)	Mollusca(100)	Bivalvia(100)	Heteroconchia(100)	Vasticardium(75)	Vasticardium_enode(75)
Otu1625	4	Eukaryota(100)	Archaeplastida(100)	Archaeplastida_unclassified(100)	Archaeplastida_unclassified(100)	Archaeplastida_unclassified(100)	Archaeplastida_unclassified(100)	Archaeplastida_unclassified(100)	Archaeplastida_unclassified(100)
Otu1626	4	Eukaryota(100)	Alveolata(100)	Dinoflagellata(100)	Dinophyceae(100)	Dinophyceae_unclassified(100)	Dinophyceae_unclassified(100)	Dinophyceae_unclassified(100)	Dinophyceae_unclassified(100)
Otu1627	4	Eukaryota(100)	Alveolata(100)	Dinoflagellata(100)	Dinophyceae(100)	Peridiniales(100)	Protoperidiniaceae(100)	Protoperidinium(100)	Protoperidinium_punctulatum(100)
Otu1628	4	Eukaryota(100)	Eukaryota_unclassified(100)	Eukaryota_unclassified(100)	Eukaryota_unclassified(100)	Eukaryota_unclassified(100)	Eukaryota_unclassified(100)	Eukaryota_unclassified(100)	Eukaryota_unclassified(100)
Otu1629	4	Eukaryota(100)	Eukaryota_unclassified(100)	Eukaryota_unclassified(100)	Eukaryota_unclassified(100)	Eukaryota_unclassified(100)	Eukaryota_unclassified(100)	Eukaryota_unclassified(100)	Eukaryota_unclassified(100)
Otu1630	4	Eukaryota(100)	Alveolata(75)	Alveolata_unclassified(75)	Alveolata_unclassified(75)	Alveolata_unclassified(75)	Alveolata_unclassified(75)	Alveolata_unclassified(75)	Alveolata_unclassified(75)
Otu1631	4	Eukaryota(100)	Eukaryota_unclassified(100)	Eukaryota_unclassified(100)	Eukaryota_unclassified(100)	Eukaryota_unclassified(100)	Eukaryota_unclassified(100)	Eukaryota_unclassified(100)	Eukaryota_unclassified(100)
Otu1632	4	Eukaryota(100)	Archaeplastida(100)	Archaeplastida_unclassified(100)	Archaeplastida_unclassified(100)	Archaeplastida_unclassified(100)	Archaeplastida_unclassified(100)	Archaeplastida_unclassified(100)	Archaeplastida_unclassified(100)
Otu1633	4	Eukaryota(100)	Eukaryota_unclassified(100)	Eukaryota_unclassified(100)	Eukaryota_unclassified(100)	Eukaryota_unclassified(100)	Eukaryota_unclassified(100)	Eukaryota_unclassified(100)	Eukaryota_unclassified(100)
Otu1634	4	Eukaryota(100)	Eukaryota_unclassified(100)	Eukaryota_unclassified(100)	Eukaryota_unclassified(100)	Eukaryota_unclassified(100)	Eukaryota_unclassified(100)	Eukaryota_unclassified(100)	Eukaryota_unclassified(100)
Otu1635	4	Eukaryota(100)	Eukaryota_unclassified(100)	Eukaryota_unclassified(100)	Eukaryota_unclassified(100)	Eukaryota_unclassified(100)	Eukaryota_unclassified(100)	Eukaryota_unclassified(100)	Eukaryota_unclassified(100)
Otu1636	4	Eukaryota(100)	Opisthokonta(100)	Metazoa(100)	Platyhelminthes(100)	Cestoda(100)	Eucestoda(100)	Eucestoda_unclassified(100)	Eucestoda_unclassified(100)
Otu1637	4	Eukaryota(100)	Eukaryota_unclassified(100)	Eukaryota_unclassified(100)	Eukaryota_unclassified(100)	Eukaryota_unclassified(100)	Eukaryota_unclassified(100)	Eukaryota_unclassified(100)	Eukaryota_unclassified(100)
Otu1638	4	Eukaryota(100)	Alveolata(100)	Dinoflagellata(100)	Syndiniales(100)	Dino-Group-II(100)	Dino-Group-II-Clade-28(100)	Dino-Group-II-Clade-28_X(100)	Dino-Group-II-Clade-28_X_sp.(100)
Otu1639	4	Eukaryota(100)	Eukaryota_unclassified(100)	Eukaryota_unclassified(100)	Eukaryota_unclassified(100)	Eukaryota_unclassified(100)	Eukaryota_unclassified(100)	Eukaryota_unclassified(100)	Eukaryota_unclassified(100)
Otu1640	4	Eukaryota(100)	Eukaryota_unclassified(100)	Eukaryota_unclassified(100)	Eukaryota_unclassified(100)	Eukaryota_unclassified(100)	Eukaryota_unclassified(100)	Eukaryota_unclassified(100)	Eukaryota_unclassified(100)
Otu1641	4	Eukaryota(100)	Opisthokonta(100)	Fungi(100)	Fungi_unclassified(100)	Fungi_unclassified(100)	Fungi_unclassified(100)	Fungi_unclassified(100)	Fungi_unclassified(100)
Otu1642	4	Eukaryota(100)	Alveolata(100)	Dinoflagellata(100)	Dinophyceae(100)	Gonyaulacales(100)	Goniodomataceae(100)	Alexandrium(100)	Alexandrium_unclassified(100)
Otu1643	4	Eukaryota(100)	Alveolata(100)	Dinoflagellata(100)	Dinophyceae(100)	Gonyaulacales(100)	Goniodomataceae(100)	Alexandrium(100)	Alexandrium_unclassified(100)
Otu1644	4	Eukaryota(100)	Opisthokonta(100)	Metazoa(100)	Mollusca(100)	Bivalvia(100)	Heteroconchia(100)	Hiatella(100)	Hiatella_unclassified(100)
Otu1645	4	Eukaryota(100)	Opisthokonta(100)	Metazoa(100)	Mollusca(100)	Gastropoda(100)	Nudibranchia(100)	Nudibranchia_unclassified(100)	Nudibranchia_unclassified(100)
Otu1646	4	Eukaryota(100)	Opisthokonta(100)	Metazoa(100)	Acanthocephala(100)	Acanthocephala_X(100)	Acanthocephala_XX(100)	Acanthocephala_XX_unclassified(100)	Acanthocephala_XX_unclassified(100)
Otu1647	4	Eukaryota(100)	Eukaryota_unclassified(100)	Eukaryota_unclassified(100)	Eukaryota_unclassified(100)	Eukaryota_unclassified(100)	Eukaryota_unclassified(100)	Eukaryota_unclassified(100)	Eukaryota_unclassified(100)
Otu1648	4	Eukaryota(100)	Stramenopiles(75)	Stramenopiles_unclassified(75)	Stramenopiles_unclassified(75)	Stramenopiles_unclassified(75)	Stramenopiles_unclassified(75)	Stramenopiles_unclassified(75)	Stramenopiles_unclassified(75)
Otu1649	4	Eukaryota(100)	Eukaryota_unclassified(100)	Eukaryota_unclassified(100)	Eukaryota_unclassified(100)	Eukaryota_unclassified(100)	Eukaryota_unclassified(100)	Eukaryota_unclassified(100)	Eukaryota_unclassified(100)
Otu1650	4	Eukaryota(100)	Eukaryota_unclassified(100)	Eukaryota_unclassified(100)	Eukaryota_unclassified(100)	Eukaryota_unclassified(100)	Eukaryota_unclassified(100)	Eukaryota_unclassified(100)	Eukaryota_unclassified(100)
Otu1651	4	Eukaryota(100)	Archaeplastida(100)	Archaeplastida_unclassified(100)	Archaeplastida_unclassified(100)	Archaeplastida_unclassified(100)	Archaeplastida_unclassified(100)	Archaeplastida_unclassified(100)	Archaeplastida_unclassified(100)
Otu1652	4	Eukaryota(100)	Alveolata(100)	Dinoflagellata(100)	Dinophyceae(100)	Gonyaulacales(100)	Goniodomataceae(100)	Alexandrium(100)	Alexandrium_unclassified(100)
Otu1653	4	Eukaryota(100)	Alveolata(100)	Dinoflagellata(100)	Dinophyceae(100)	Dinophyceae_unclassified(100)	Dinophyceae_unclassified(100)	Dinophyceae_unclassified(100)	Dinophyceae_unclassified(100)
Otu1654	4	Eukaryota(100)	Eukaryota_unclassified(100)	Eukaryota_unclassified(100)	Eukaryota_unclassified(100)	Eukaryota_unclassified(100)	Eukaryota_unclassified(100)	Eukaryota_unclassified(100)	Eukaryota_unclassified(100)
Otu1655	4	Eukaryota(100)	Eukaryota_unclassified(100)	Eukaryota_unclassified(100)	Eukaryota_unclassified(100)	Eukaryota_unclassified(100)	Eukaryota_unclassified(100)	Eukaryota_unclassified(100)	Eukaryota_unclassified(100)
Otu1656	4	Eukaryota(100)	Alveolata(100)	Dinoflagellata(100)	Dinophyceae(100)	Suessiales(100)	Suessiaceae(100)	Suessiaceae_unclassified(100)	Suessiaceae_unclassified(100)
Otu1657	4	Eukaryota(100)	Opisthokonta(100)	Metazoa(100)	Mollusca(100)	Gastropoda(100)	Nudibranchia(100)	Nudibranchia_unclassified(100)	Nudibranchia_unclassified(100)
Otu1658	4	Eukaryota(100)	Eukaryota_unclassified(100)	Eukaryota_unclassified(100)	Eukaryota_unclassified(100)	Eukaryota_unclassified(100)	Eukaryota_unclassified(100)	Eukaryota_unclassified(100)	Eukaryota_unclassified(100)
Otu1659	4	Eukaryota(100)	Eukaryota_unclassified(100)	Eukaryota_unclassified(100)	Eukaryota_unclassified(100)	Eukaryota_unclassified(100)	Eukaryota_unclassified(100)	Eukaryota_unclassified(100)	Eukaryota_unclassified(100)
Otu1660	4	Eukaryota(100)	Opisthokonta(100)	Metazoa(100)	Arthropoda(100)	Crustacea(100)	Malacostraca(100)	Malacostraca_unclassified(100)	Malacostraca_unclassified(100)
Otu1661	4	Eukaryota(100)	Eukaryota_unclassified(100)	Eukaryota_unclassified(100)	Eukaryota_unclassified(100)	Eukaryota_unclassified(100)	Eukaryota_unclassified(100)	Eukaryota_unclassified(100)	Eukaryota_unclassified(100)
Otu1662	4	Eukaryota(100)	Eukaryota_unclassified(100)	Eukaryota_unclassified(100)	Eukaryota_unclassified(100)	Eukaryota_unclassified(100)	Eukaryota_unclassified(100)	Eukaryota_unclassified(100)	Eukaryota_unclassified(100)
Otu1663	4	Eukaryota(100)	Eukaryota_unclassified(100)	Eukaryota_unclassified(100)	Eukaryota_unclassified(100)	Eukaryota_unclassified(100)	Eukaryota_unclassified(100)	Eukaryota_unclassified(100)	Eukaryota_unclassified(100)
Otu1664	4	Eukaryota(100)	Opisthokonta(100)	Fungi(100)	Fungi_unclassified(100)	Fungi_unclassified(100)	Fungi_unclassified(100)	Fungi_unclassified(100)	Fungi_unclassified(100)
Otu1665	4	Eukaryota(100)	Opisthokonta(100)	Metazoa(100)	Platyhelminthes(100)	Cestoda(100)	Eucestoda(100)	Diphyllobothrium(100)	Diphyllobothrium_unclassified(100)
Otu1666	4	Eukaryota(100)	Eukaryota_unclassified(100)	Eukaryota_unclassified(100)	Eukaryota_unclassified(100)	Eukaryota_unclassified(100)	Eukaryota_unclassified(100)	Eukaryota_unclassified(100)	Eukaryota_unclassified(100)
Otu1667	4	Eukaryota(100)	Eukaryota_unclassified(100)	Eukaryota_unclassified(100)	Eukaryota_unclassified(100)	Eukaryota_unclassified(100)	Eukaryota_unclassified(100)	Eukaryota_unclassified(100)	Eukaryota_unclassified(100)
Otu1668	4	Eukaryota(100)	Eukaryota_unclassified(100)	Eukaryota_unclassified(100)	Eukaryota_unclassified(100)	Eukaryota_unclassified(100)	Eukaryota_unclassified(100)	Eukaryota_unclassified(100)	Eukaryota_unclassified(100)
Otu1669	4	Eukaryota(100)	Eukaryota_unclassified(100)	Eukaryota_unclassified(100)	Eukaryota_unclassified(100)	Eukaryota_unclassified(100)	Eukaryota_unclassified(100)	Eukaryota_unclassified(100)	Eukaryota_unclassified(100)
Otu1670	4	Eukaryota(100)	Eukaryota_unclassified(100)	Eukaryota_unclassified(100)	Eukaryota_unclassified(100)	Eukaryota_unclassified(100)	Eukaryota_unclassified(100)	Eukaryota_unclassified(100)	Eukaryota_unclassified(100)
Otu1671	4	Eukaryota(100)	Alveolata(100)	Dinoflagellata(100)	Dinophyceae(100)	Gonyaulacales(100)	Goniodomataceae(100)	Alexandrium(100)	Alexandrium_unclassified(75)
Otu1672	4	Eukaryota(100)	Eukaryota_unclassified(100)	Eukaryota_unclassified(100)	Eukaryota_unclassified(100)	Eukaryota_unclassified(100)	Eukaryota_unclassified(100)	Eukaryota_unclassified(100)	Eukaryota_unclassified(100)
Otu1673	4	Eukaryota(100)	Eukaryota_unclassified(100)	Eukaryota_unclassified(100)	Eukaryota_unclassified(100)	Eukaryota_unclassified(100)	Eukaryota_unclassified(100)	Eukaryota_unclassified(100)	Eukaryota_unclassified(100)
Otu1674	4	Eukaryota(100)	Eukaryota_unclassified(100)	Eukaryota_unclassified(100)	Eukaryota_unclassified(100)	Eukaryota_unclassified(100)	Eukaryota_unclassified(100)	Eukaryota_unclassified(100)	Eukaryota_unclassified(100)
Otu1675	4	Eukaryota(100)	Opisthokonta(100)	Metazoa(100)	Acanthocephala(100)	Acanthocephala_X(100)	Acanthocephala_XX(100)	Corynosoma(100)	Corynosoma_unclassified(100)
Otu1676	4	Eukaryota(100)	Eukaryota_unclassified(100)	Eukaryota_unclassified(100)	Eukaryota_unclassified(100)	Eukaryota_unclassified(100)	Eukaryota_unclassified(100)	Eukaryota_unclassified(100)	Eukaryota_unclassified(100)
Otu1677	4	Eukaryota(100)	Opisthokonta(100)	Metazoa(100)	Platyhelminthes(100)	Cestoda(100)	Eucestoda(100)	Diphyllobothrium(100)	Diphyllobothrium_unclassified(100)
Otu1678	4	Eukaryota(100)	Eukaryota_unclassified(100)	Eukaryota_unclassified(100)	Eukaryota_unclassified(100)	Eukaryota_unclassified(100)	Eukaryota_unclassified(100)	Eukaryota_unclassified(100)	Eukaryota_unclassified(100)
Otu1679	4	Eukaryota(100)	Archaeplastida(100)	Streptophyta(100)	Embryophyceae(100)	Embryophyceae_X(100)	Embryophyceae_XX(100)	Embryophyceae_XX_unclassified(100)	Embryophyceae_XX_unclassified(100)
Otu1680	4	Eukaryota(100)	Opisthokonta(100)	Fungi(100)	Ascomycota(100)	Pezizomycotina(100)	Pezizomycotina_unclassified(100)	Pezizomycotina_unclassified(100)	Pezizomycotina_unclassified(100)
Otu1681	4	Eukaryota(100)	Opisthokonta(100)	Metazoa(100)	Mollusca(100)	Bivalvia(100)	Heteroconchia(100)	Heteroconchia_unclassified(100)	Heteroconchia_unclassified(100)
Otu1682	4	Eukaryota(100)	Eukaryota_unclassified(100)	Eukaryota_unclassified(100)	Eukaryota_unclassified(100)	Eukaryota_unclassified(100)	Eukaryota_unclassified(100)	Eukaryota_unclassified(100)	Eukaryota_unclassified(100)
Otu1683	4	Eukaryota(100)	Eukaryota_unclassified(100)	Eukaryota_unclassified(100)	Eukaryota_unclassified(100)	Eukaryota_unclassified(100)	Eukaryota_unclassified(100)	Eukaryota_unclassified(100)	Eukaryota_unclassified(100)
Otu1684	4	Eukaryota(100)	Eukaryota_unclassified(100)	Eukaryota_unclassified(100)	Eukaryota_unclassified(100)	Eukaryota_unclassified(100)	Eukaryota_unclassified(100)	Eukaryota_unclassified(100)	Eukaryota_unclassified(100)
Otu1685	4	Eukaryota(100)	Eukaryota_unclassified(100)	Eukaryota_unclassified(100)	Eukaryota_unclassified(100)	Eukaryota_unclassified(100)	Eukaryota_unclassified(100)	Eukaryota_unclassified(100)	Eukaryota_unclassified(100)
Otu1686	4	Eukaryota(100)	Rhizaria(100)	Cercozoa(100)	Filosa-Thecofilosea(100)	Filosa-Thecofilosea_X(100)	Mataza-lineage(100)	Mataza-lineage_unclassified(100)	Mataza-lineage_unclassified(100)
Otu1687	4	Eukaryota(100)	Alveolata(100)	Dinoflagellata(100)	Syndiniales(100)	Dino-Group-I(100)	Dino-Group-I-Clade-1(100)	Dino-Group-I-Clade-1_X(100)	Dino-Group-I-Clade-1_X_sp.(100)
Otu1688	4	Eukaryota(100)	Eukaryota_unclassified(100)	Eukaryota_unclassified(100)	Eukaryota_unclassified(100)	Eukaryota_unclassified(100)	Eukaryota_unclassified(100)	Eukaryota_unclassified(100)	Eukaryota_unclassified(100)
Otu1689	4	Eukaryota(100)	Opisthokonta(100)	Opisthokonta_unclassified(100)	Opisthokonta_unclassified(100)	Opisthokonta_unclassified(100)	Opisthokonta_unclassified(100)	Opisthokonta_unclassified(100)	Opisthokonta_unclassified(100)
Otu1690	4	Eukaryota(100)	Eukaryota_unclassified(100)	Eukaryota_unclassified(100)	Eukaryota_unclassified(100)	Eukaryota_unclassified(100)	Eukaryota_unclassified(100)	Eukaryota_unclassified(100)	Eukaryota_unclassified(100)
Otu1691	4	Eukaryota(100)	Eukaryota_unclassified(100)	Eukaryota_unclassified(100)	Eukaryota_unclassified(100)	Eukaryota_unclassified(100)	Eukaryota_unclassified(100)	Eukaryota_unclassified(100)	Eukaryota_unclassified(100)
Otu1692	4	Eukaryota(100)	Eukaryota_unclassified(100)	Eukaryota_unclassified(100)	Eukaryota_unclassified(100)	Eukaryota_unclassified(100)	Eukaryota_unclassified(100)	Eukaryota_unclassified(100)	Eukaryota_unclassified(100)
Otu1693	4	Eukaryota(100)	Eukaryota_unclassified(100)	Eukaryota_unclassified(100)	Eukaryota_unclassified(100)	Eukaryota_unclassified(100)	Eukaryota_unclassified(100)	Eukaryota_unclassified(100)	Eukaryota_unclassified(100)
Otu1694	4	Eukaryota(100)	Rhizaria(100)	Cercozoa(100)	Filosa-Thecofilosea(75)	Cryomonadida(75)	Cryomonadida_unclassified(75)	Cryomonadida_unclassified(75)	Cryomonadida_unclassified(75)
Otu1695	4	Eukaryota(100)	Eukaryota_unclassified(100)	Eukaryota_unclassified(100)	Eukaryota_unclassified(100)	Eukaryota_unclassified(100)	Eukaryota_unclassified(100)	Eukaryota_unclassified(100)	Eukaryota_unclassified(100)
Otu1696	4	Eukaryota(100)	Rhizaria(100)	Cercozoa(100)	Filosa-Thecofilosea(100)	Ventricleftida(100)	CCW10-lineage(100)	CCW10-lineage_X(100)	CCW10-lineage_X_sp.(100)
Otu1697	4	Eukaryota(100)	Rhizaria(100)	Cercozoa(100)	Filosa-Thecofilosea(100)	Filosa-Thecofilosea_X(100)	Novel-Clade-4(100)	Novel-Clade-4_X(100)	Novel-Clade-4_X_sp.(100)
Otu1698	4	Eukaryota(100)	Eukaryota_unclassified(100)	Eukaryota_unclassified(100)	Eukaryota_unclassified(100)	Eukaryota_unclassified(100)	Eukaryota_unclassified(100)	Eukaryota_unclassified(100)	Eukaryota_unclassified(100)
Otu1699	4	Eukaryota(100)	Eukaryota_unclassified(100)	Eukaryota_unclassified(100)	Eukaryota_unclassified(100)	Eukaryota_unclassified(100)	Eukaryota_unclassified(100)	Eukaryota_unclassified(100)	Eukaryota_unclassified(100)
Otu1700	4	Eukaryota(100)	Rhizaria(100)	Cercozoa(100)	Filosa-Thecofilosea(100)	Ventricleftida(100)	CCW10-lineage(100)	CCW10-lineage_X(100)	CCW10-lineage_X_sp.(100)
Otu1701	4	Eukaryota(100)	Eukaryota_unclassified(100)	Eukaryota_unclassified(100)	Eukaryota_unclassified(100)	Eukaryota_unclassified(100)	Eukaryota_unclassified(100)	Eukaryota_unclassified(100)	Eukaryota_unclassified(100)
Otu1702	4	Eukaryota(100)	Archaeplastida(100)	Chlorophyta(100)	Pyramimonadales(100)	Pyramimonadales_X(100)	Pyramimonadales_XX(100)	Pyramimonas(100)	Pyramimonas_unclassified(100)
Otu1703	4	Eukaryota(100)	Eukaryota_unclassified(100)	Eukaryota_unclassified(100)	Eukaryota_unclassified(100)	Eukaryota_unclassified(100)	Eukaryota_unclassified(100)	Eukaryota_unclassified(100)	Eukaryota_unclassified(100)
Otu1704	4	Eukaryota(100)	Opisthokonta(100)	Metazoa(100)	Acanthocephala(100)	Acanthocephala_X(100)	Acanthocephala_XX(100)	Corynosoma(75)	Corynosoma_unclassified(75)
Otu1705	4	Eukaryota(100)	Archaeplastida(100)	Chlorophyta(100)	Trebouxiophyceae(100)	Microthamniales(100)	Microthamniales_X(100)	Microthamniales_X_unclassified(100)	Microthamniales_X_unclassified(100)
Otu1706	4	Eukaryota(100)	Eukaryota_unclassified(100)	Eukaryota_unclassified(100)	Eukaryota_unclassified(100)	Eukaryota_unclassified(100)	Eukaryota_unclassified(100)	Eukaryota_unclassified(100)	Eukaryota_unclassified(100)
Otu1707	4	Eukaryota(100)	Eukaryota_unclassified(100)	Eukaryota_unclassified(100)	Eukaryota_unclassified(100)	Eukaryota_unclassified(100)	Eukaryota_unclassified(100)	Eukaryota_unclassified(100)	Eukaryota_unclassified(100)
Otu1708	4	Eukaryota(100)	Eukaryota_unclassified(100)	Eukaryota_unclassified(100)	Eukaryota_unclassified(100)	Eukaryota_unclassified(100)	Eukaryota_unclassified(100)	Eukaryota_unclassified(100)	Eukaryota_unclassified(100)
Otu1709	4	Eukaryota(100)	Eukaryota_unclassified(100)	Eukaryota_unclassified(100)	Eukaryota_unclassified(100)	Eukaryota_unclassified(100)	Eukaryota_unclassified(100)	Eukaryota_unclassified(100)	Eukaryota_unclassified(100)
Otu1710	4	Eukaryota(100)	Opisthokonta(100)	Metazoa(100)	Platyhelminthes(100)	Cestoda(100)	Eucestoda(100)	Diphyllobothrium(100)	Diphyllobothrium_latum(100)
Otu1711	4	Eukaryota(100)	Stramenopiles(100)	Ochrophyta(100)	Chrysophyceae(100)	Chrysophyceae_X(100)	Chrysophyceae_Clade-H(100)	Chrysophyceae_Clade-H_X(100)	Chrysophyceae_Clade-H_X_sp.(100)
Otu1712	4	Eukaryota(100)	Stramenopiles(100)	Ochrophyta(100)	Bacillariophyta(100)	Bacillariophyta_X(100)	Radial-centric-basal-Coscinodiscophyceae(100)	Leptocylindrus(100)	Leptocylindrus_minimus(100)
Otu1713	4	Eukaryota(100)	Eukaryota_unclassified(100)	Eukaryota_unclassified(100)	Eukaryota_unclassified(100)	Eukaryota_unclassified(100)	Eukaryota_unclassified(100)	Eukaryota_unclassified(100)	Eukaryota_unclassified(100)
Otu1714	4	Eukaryota(100)	Eukaryota_unclassified(100)	Eukaryota_unclassified(100)	Eukaryota_unclassified(100)	Eukaryota_unclassified(100)	Eukaryota_unclassified(100)	Eukaryota_unclassified(100)	Eukaryota_unclassified(100)
Otu1715	4	Eukaryota(100)	Eukaryota_unclassified(100)	Eukaryota_unclassified(100)	Eukaryota_unclassified(100)	Eukaryota_unclassified(100)	Eukaryota_unclassified(100)	Eukaryota_unclassified(100)	Eukaryota_unclassified(100)
Otu1716	4	Eukaryota(100)	Eukaryota_unclassified(100)	Eukaryota_unclassified(100)	Eukaryota_unclassified(100)	Eukaryota_unclassified(100)	Eukaryota_unclassified(100)	Eukaryota_unclassified(100)	Eukaryota_unclassified(100)
Otu1717	4	Eukaryota(100)	Alveolata(100)	Apicomplexa(100)	Coccidiomorphea(100)	Agamococcidiorida(100)	Rhytidocystidae(100)	Rhytidocystidae_X(100)	Rhytidocystidae_X_sp.(100)
Otu1718	4	Eukaryota(100)	Eukaryota_unclassified(100)	Eukaryota_unclassified(100)	Eukaryota_unclassified(100)	Eukaryota_unclassified(100)	Eukaryota_unclassified(100)	Eukaryota_unclassified(100)	Eukaryota_unclassified(100)
Otu1719	4	Eukaryota(100)	Archaeplastida(100)	Chlorophyta(100)	Chlorophyta_unclassified(100)	Chlorophyta_unclassified(100)	Chlorophyta_unclassified(100)	Chlorophyta_unclassified(100)	Chlorophyta_unclassified(100)
Otu1720	4	Eukaryota(100)	Opisthokonta(100)	Metazoa(100)	Craniata(100)	Craniata_X(100)	Craniata_X_unclassified(100)	Craniata_X_unclassified(100)	Craniata_X_unclassified(100)
Otu1721	4	Eukaryota(100)	Opisthokonta(100)	Fungi(100)	Basidiomycota(100)	Agaricomycotina(100)	Agaricomycetes(100)	Agaricomycetes_unclassified(100)	Agaricomycetes_unclassified(100)
Otu1722	4	Eukaryota(100)	Opisthokonta(100)	Fungi(100)	Ascomycota(100)	Saccharomycotina(100)	Saccharomycetales(100)	Saccharomycetales_unclassified(100)	Saccharomycetales_unclassified(100)
Otu1723	4	Eukaryota(100)	Alveolata(100)	Dinoflagellata(100)	Dinophyceae(100)	Gonyaulacales(100)	Goniodomataceae(100)	Alexandrium(100)	Alexandrium_unclassified(100)
Otu1724	4	Eukaryota(100)	Eukaryota_unclassified(100)	Eukaryota_unclassified(100)	Eukaryota_unclassified(100)	Eukaryota_unclassified(100)	Eukaryota_unclassified(100)	Eukaryota_unclassified(100)	Eukaryota_unclassified(100)
Otu1725	4	Eukaryota(100)	Eukaryota_unclassified(100)	Eukaryota_unclassified(100)	Eukaryota_unclassified(100)	Eukaryota_unclassified(100)	Eukaryota_unclassified(100)	Eukaryota_unclassified(100)	Eukaryota_unclassified(100)
Otu1726	4	Eukaryota(100)	Opisthokonta(100)	Metazoa(100)	Cnidaria(100)	Cnidaria_X(100)	Hydrozoa(100)	Hydrozoa_unclassified(100)	Hydrozoa_unclassified(100)
Otu1727	4	Eukaryota(100)	Opisthokonta(100)	Metazoa(100)	Acanthocephala(100)	Acanthocephala_X(100)	Acanthocephala_XX(100)	Acanthocephala_XX_unclassified(100)	Acanthocephala_XX_unclassified(100)
Otu1728	4	Eukaryota(100)	Eukaryota_unclassified(100)	Eukaryota_unclassified(100)	Eukaryota_unclassified(100)	Eukaryota_unclassified(100)	Eukaryota_unclassified(100)	Eukaryota_unclassified(100)	Eukaryota_unclassified(100)
Otu1729	4	Eukaryota(100)	Eukaryota_unclassified(100)	Eukaryota_unclassified(100)	Eukaryota_unclassified(100)	Eukaryota_unclassified(100)	Eukaryota_unclassified(100)	Eukaryota_unclassified(100)	Eukaryota_unclassified(100)
Otu1730	4	Eukaryota(100)	Alveolata(100)	Ciliophora(100)	Spirotrichea(100)	Tintinnida(100)	Tintinnidiidae(100)	Tintinnidium(100)	Tintinnidium_unclassified(100)
Otu1731	4	Eukaryota(100)	Eukaryota_unclassified(100)	Eukaryota_unclassified(100)	Eukaryota_unclassified(100)	Eukaryota_unclassified(100)	Eukaryota_unclassified(100)	Eukaryota_unclassified(100)	Eukaryota_unclassified(100)
Otu1732	4	Eukaryota(100)	Eukaryota_unclassified(100)	Eukaryota_unclassified(100)	Eukaryota_unclassified(100)	Eukaryota_unclassified(100)	Eukaryota_unclassified(100)	Eukaryota_unclassified(100)	Eukaryota_unclassified(100)
Otu1733	4	Eukaryota(100)	Opisthokonta(100)	Metazoa(100)	Acanthocephala(100)	Acanthocephala_X(100)	Acanthocephala_XX(100)	Acanthocephala_XX_unclassified(100)	Acanthocephala_XX_unclassified(100)
Otu1734	4	Eukaryota(100)	Rhizaria(100)	Cercozoa(100)	Filosa-Thecofilosea(100)	Ventricleftida(100)	CCW10-lineage(100)	CCW10-lineage_X(100)	CCW10-lineage_X_sp.(100)
Otu1735	4	Eukaryota(100)	Eukaryota_unclassified(100)	Eukaryota_unclassified(100)	Eukaryota_unclassified(100)	Eukaryota_unclassified(100)	Eukaryota_unclassified(100)	Eukaryota_unclassified(100)	Eukaryota_unclassified(100)
Otu1736	4	Eukaryota(100)	Eukaryota_unclassified(100)	Eukaryota_unclassified(100)	Eukaryota_unclassified(100)	Eukaryota_unclassified(100)	Eukaryota_unclassified(100)	Eukaryota_unclassified(100)	Eukaryota_unclassified(100)
Otu1737	4	Eukaryota(100)	Eukaryota_unclassified(100)	Eukaryota_unclassified(100)	Eukaryota_unclassified(100)	Eukaryota_unclassified(100)	Eukaryota_unclassified(100)	Eukaryota_unclassified(100)	Eukaryota_unclassified(100)
Otu1738	4	Eukaryota(100)	Eukaryota_unclassified(100)	Eukaryota_unclassified(100)	Eukaryota_unclassified(100)	Eukaryota_unclassified(100)	Eukaryota_unclassified(100)	Eukaryota_unclassified(100)	Eukaryota_unclassified(100)
Otu1739	4	Eukaryota(100)	Rhizaria(100)	Cercozoa(100)	Filosa-Imbricatea(100)	Thaumatomonadida(100)	Thaumatomonadidae(100)	Reckertia(100)	Reckertia_filosa(100)
Otu1740	4	Eukaryota(100)	Rhizaria(100)	Cercozoa(100)	Filosa-Thecofilosea(100)	Ventricleftida(100)	CCW10-lineage(100)	CCW10-lineage_X(100)	CCW10-lineage_X_sp.(100)
Otu1741	4	Eukaryota(100)	Opisthokonta(100)	Metazoa(100)	Acanthocephala(100)	Acanthocephala_X(100)	Acanthocephala_XX(100)	Acanthocephala_XX_unclassified(100)	Acanthocephala_XX_unclassified(100)
Otu1742	4	Eukaryota(100)	Eukaryota_unclassified(100)	Eukaryota_unclassified(100)	Eukaryota_unclassified(100)	Eukaryota_unclassified(100)	Eukaryota_unclassified(100)	Eukaryota_unclassified(100)	Eukaryota_unclassified(100)
Otu1743	4	Eukaryota(100)	Eukaryota_unclassified(100)	Eukaryota_unclassified(100)	Eukaryota_unclassified(100)	Eukaryota_unclassified(100)	Eukaryota_unclassified(100)	Eukaryota_unclassified(100)	Eukaryota_unclassified(100)
Otu1744	4	Eukaryota(100)	Eukaryota_unclassified(100)	Eukaryota_unclassified(100)	Eukaryota_unclassified(100)	Eukaryota_unclassified(100)	Eukaryota_unclassified(100)	Eukaryota_unclassified(100)	Eukaryota_unclassified(100)
Otu1745	4	Eukaryota(100)	Eukaryota_unclassified(100)	Eukaryota_unclassified(100)	Eukaryota_unclassified(100)	Eukaryota_unclassified(100)	Eukaryota_unclassified(100)	Eukaryota_unclassified(100)	Eukaryota_unclassified(100)
Otu1746	4	Eukaryota(100)	Eukaryota_unclassified(100)	Eukaryota_unclassified(100)	Eukaryota_unclassified(100)	Eukaryota_unclassified(100)	Eukaryota_unclassified(100)	Eukaryota_unclassified(100)	Eukaryota_unclassified(100)
Otu1747	4	Eukaryota(100)	Rhizaria(100)	Cercozoa(100)	Filosa-Thecofilosea(100)	Ventricleftida(100)	Ventrifissuridae(100)	Ventrifissuridae_unclassified(100)	Ventrifissuridae_unclassified(100)
Otu1748	4	Eukaryota(100)	Eukaryota_unclassified(100)	Eukaryota_unclassified(100)	Eukaryota_unclassified(100)	Eukaryota_unclassified(100)	Eukaryota_unclassified(100)	Eukaryota_unclassified(100)	Eukaryota_unclassified(100)
Otu1749	4	Eukaryota(100)	Alveolata(100)	Dinoflagellata(100)	Dinophyceae(100)	Gonyaulacales(100)	Goniodomataceae(100)	Alexandrium(100)	Alexandrium_unclassified(100)
Otu1750	4	Eukaryota(100)	Eukaryota_unclassified(100)	Eukaryota_unclassified(100)	Eukaryota_unclassified(100)	Eukaryota_unclassified(100)	Eukaryota_unclassified(100)	Eukaryota_unclassified(100)	Eukaryota_unclassified(100)
Otu1751	4	Eukaryota(100)	Eukaryota_unclassified(100)	Eukaryota_unclassified(100)	Eukaryota_unclassified(100)	Eukaryota_unclassified(100)	Eukaryota_unclassified(100)	Eukaryota_unclassified(100)	Eukaryota_unclassified(100)
Otu1752	4	Eukaryota(100)	Stramenopiles(100)	Ochrophyta(100)	Ochrophyta_unclassified(100)	Ochrophyta_unclassified(100)	Ochrophyta_unclassified(100)	Ochrophyta_unclassified(100)	Ochrophyta_unclassified(100)
Otu1753	4	Eukaryota(100)	Eukaryota_unclassified(100)	Eukaryota_unclassified(100)	Eukaryota_unclassified(100)	Eukaryota_unclassified(100)	Eukaryota_unclassified(100)	Eukaryota_unclassified(100)	Eukaryota_unclassified(100)
Otu1754	4	Eukaryota(100)	Opisthokonta(100)	Metazoa(100)	Arthropoda(100)	Chelicerata(100)	Arachnida(100)	Demodex(100)	Demodex_brevis(100)
Otu1755	4	Eukaryota(100)	Eukaryota_unclassified(100)	Eukaryota_unclassified(100)	Eukaryota_unclassified(100)	Eukaryota_unclassified(100)	Eukaryota_unclassified(100)	Eukaryota_unclassified(100)	Eukaryota_unclassified(100)
Otu1756	4	Eukaryota(100)	Eukaryota_unclassified(100)	Eukaryota_unclassified(100)	Eukaryota_unclassified(100)	Eukaryota_unclassified(100)	Eukaryota_unclassified(100)	Eukaryota_unclassified(100)	Eukaryota_unclassified(100)
Otu1757	4	Eukaryota(100)	Alveolata(100)	Alveolata_unclassified(100)	Alveolata_unclassified(100)	Alveolata_unclassified(100)	Alveolata_unclassified(100)	Alveolata_unclassified(100)	Alveolata_unclassified(100)
Otu1758	4	Eukaryota(100)	Eukaryota_unclassified(100)	Eukaryota_unclassified(100)	Eukaryota_unclassified(100)	Eukaryota_unclassified(100)	Eukaryota_unclassified(100)	Eukaryota_unclassified(100)	Eukaryota_unclassified(100)
Otu1759	4	Eukaryota(100)	Eukaryota_unclassified(100)	Eukaryota_unclassified(100)	Eukaryota_unclassified(100)	Eukaryota_unclassified(100)	Eukaryota_unclassified(100)	Eukaryota_unclassified(100)	Eukaryota_unclassified(100)
Otu1760	4	Eukaryota(100)	Rhizaria(100)	Cercozoa(100)	Filosa-Thecofilosea(100)	Filosa-Thecofilosea_X(100)	Mataza-lineage(100)	Mataza(100)	Mataza_hastifera(100)
Otu1761	4	Eukaryota(100)	Eukaryota_unclassified(100)	Eukaryota_unclassified(100)	Eukaryota_unclassified(100)	Eukaryota_unclassified(100)	Eukaryota_unclassified(100)	Eukaryota_unclassified(100)	Eukaryota_unclassified(100)
Otu1762	4	Eukaryota(100)	Eukaryota_unclassified(100)	Eukaryota_unclassified(100)	Eukaryota_unclassified(100)	Eukaryota_unclassified(100)	Eukaryota_unclassified(100)	Eukaryota_unclassified(100)	Eukaryota_unclassified(100)
Otu1763	4	Eukaryota(100)	Eukaryota_unclassified(100)	Eukaryota_unclassified(100)	Eukaryota_unclassified(100)	Eukaryota_unclassified(100)	Eukaryota_unclassified(100)	Eukaryota_unclassified(100)	Eukaryota_unclassified(100)
Otu1764	4	Eukaryota(100)	Opisthokonta(100)	Metazoa(100)	Platyhelminthes(100)	Trematoda(100)	Digenea(100)	Digenea_unclassified(100)	Digenea_unclassified(100)
Otu1765	4	Eukaryota(100)	Eukaryota_unclassified(100)	Eukaryota_unclassified(100)	Eukaryota_unclassified(100)	Eukaryota_unclassified(100)	Eukaryota_unclassified(100)	Eukaryota_unclassified(100)	Eukaryota_unclassified(100)
Otu1766	4	Eukaryota(100)	Opisthokonta(100)	Metazoa(100)	Platyhelminthes(100)	Trematoda(100)	Digenea(100)	Digenea_unclassified(100)	Digenea_unclassified(100)
Otu1767	4	Eukaryota(100)	Alveolata(100)	Dinoflagellata(100)	Dinophyceae(100)	Gonyaulacales(100)	Goniodomataceae(100)	Alexandrium(100)	Alexandrium_unclassified(75)
Otu1768	4	Eukaryota(100)	Opisthokonta(100)	Metazoa(100)	Nematoda(100)	Chromadorea(100)	Chromadorea_X(100)	Strongyloides(100)	Strongyloides_procyonis(100)
Otu1769	4	Eukaryota(100)	Archaeplastida(100)	Chlorophyta(100)	Ulvophyceae(100)	Ulotrichales(100)	Ulotrichales_X(100)	Pseudendocloniopsis(100)	Pseudendocloniopsis_botryoides(100)
Otu1770	4	Eukaryota(100)	Eukaryota_unclassified(100)	Eukaryota_unclassified(100)	Eukaryota_unclassified(100)	Eukaryota_unclassified(100)	Eukaryota_unclassified(100)	Eukaryota_unclassified(100)	Eukaryota_unclassified(100)
Otu1771	4	Eukaryota(100)	Stramenopiles(100)	Pseudofungi(100)	Oomycota(100)	Oomycota_X(100)	Oomycota_X_unclassified(100)	Oomycota_X_unclassified(100)	Oomycota_X_unclassified(100)
Otu1772	4	Eukaryota(100)	Eukaryota_unclassified(100)	Eukaryota_unclassified(100)	Eukaryota_unclassified(100)	Eukaryota_unclassified(100)	Eukaryota_unclassified(100)	Eukaryota_unclassified(100)	Eukaryota_unclassified(100)
Otu1773	4	Eukaryota(100)	Eukaryota_unclassified(100)	Eukaryota_unclassified(100)	Eukaryota_unclassified(100)	Eukaryota_unclassified(100)	Eukaryota_unclassified(100)	Eukaryota_unclassified(100)	Eukaryota_unclassified(100)
Otu1774	4	Eukaryota(100)	Eukaryota_unclassified(100)	Eukaryota_unclassified(100)	Eukaryota_unclassified(100)	Eukaryota_unclassified(100)	Eukaryota_unclassified(100)	Eukaryota_unclassified(100)	Eukaryota_unclassified(100)
Otu1775	4	Eukaryota(100)	Eukaryota_unclassified(100)	Eukaryota_unclassified(100)	Eukaryota_unclassified(100)	Eukaryota_unclassified(100)	Eukaryota_unclassified(100)	Eukaryota_unclassified(100)	Eukaryota_unclassified(100)
Otu1776	4	Eukaryota(100)	Archaeplastida(100)	Archaeplastida_unclassified(100)	Archaeplastida_unclassified(100)	Archaeplastida_unclassified(100)	Archaeplastida_unclassified(100)	Archaeplastida_unclassified(100)	Archaeplastida_unclassified(100)
Otu1777	4	Eukaryota(100)	Eukaryota_unclassified(100)	Eukaryota_unclassified(100)	Eukaryota_unclassified(100)	Eukaryota_unclassified(100)	Eukaryota_unclassified(100)	Eukaryota_unclassified(100)	Eukaryota_unclassified(100)
Otu1778	4	Eukaryota(100)	Eukaryota_unclassified(100)	Eukaryota_unclassified(100)	Eukaryota_unclassified(100)	Eukaryota_unclassified(100)	Eukaryota_unclassified(100)	Eukaryota_unclassified(100)	Eukaryota_unclassified(100)
Otu1779	4	Eukaryota(100)	Rhizaria(100)	Cercozoa(100)	Filosa-Imbricatea(100)	Thaumatomonadida(100)	Thaumatomonadidae(100)	Reckertia(100)	Reckertia_filosa(100)
Otu1780	4	Eukaryota(100)	Eukaryota_unclassified(100)	Eukaryota_unclassified(100)	Eukaryota_unclassified(100)	Eukaryota_unclassified(100)	Eukaryota_unclassified(100)	Eukaryota_unclassified(100)	Eukaryota_unclassified(100)
Otu1781	4	Eukaryota(100)	Eukaryota_unclassified(100)	Eukaryota_unclassified(100)	Eukaryota_unclassified(100)	Eukaryota_unclassified(100)	Eukaryota_unclassified(100)	Eukaryota_unclassified(100)	Eukaryota_unclassified(100)
Otu1782	4	Eukaryota(100)	Alveolata(100)	Dinoflagellata(100)	Dinophyceae(100)	Gonyaulacales(100)	Goniodomataceae(100)	Alexandrium(100)	Alexandrium_unclassified(100)
Otu1783	4	Eukaryota(100)	Eukaryota_unclassified(100)	Eukaryota_unclassified(100)	Eukaryota_unclassified(100)	Eukaryota_unclassified(100)	Eukaryota_unclassified(100)	Eukaryota_unclassified(100)	Eukaryota_unclassified(100)
Otu1784	4	Eukaryota(100)	Eukaryota_unclassified(100)	Eukaryota_unclassified(100)	Eukaryota_unclassified(100)	Eukaryota_unclassified(100)	Eukaryota_unclassified(100)	Eukaryota_unclassified(100)	Eukaryota_unclassified(100)
Otu1785	4	Eukaryota(100)	Alveolata(100)	Dinoflagellata(100)	Dinophyceae(100)	Gonyaulacales(100)	Goniodomataceae(100)	Alexandrium(100)	Alexandrium_unclassified(100)
Otu1786	4	Eukaryota(100)	Rhizaria(100)	Cercozoa(100)	Filosa-Thecofilosea(100)	Cryomonadida(100)	Protaspa-lineage(100)	Protaspa(100)	Protaspa_unclassified(100)
Otu1787	4	Eukaryota(100)	Eukaryota_unclassified(100)	Eukaryota_unclassified(100)	Eukaryota_unclassified(100)	Eukaryota_unclassified(100)	Eukaryota_unclassified(100)	Eukaryota_unclassified(100)	Eukaryota_unclassified(100)
Otu1788	4	Eukaryota(100)	Eukaryota_unclassified(100)	Eukaryota_unclassified(100)	Eukaryota_unclassified(100)	Eukaryota_unclassified(100)	Eukaryota_unclassified(100)	Eukaryota_unclassified(100)	Eukaryota_unclassified(100)
Otu1789	4	Eukaryota(100)	Eukaryota_unclassified(100)	Eukaryota_unclassified(100)	Eukaryota_unclassified(100)	Eukaryota_unclassified(100)	Eukaryota_unclassified(100)	Eukaryota_unclassified(100)	Eukaryota_unclassified(100)
Otu1790	4	Eukaryota(100)	Eukaryota_unclassified(75)	Eukaryota_unclassified(75)	Eukaryota_unclassified(75)	Eukaryota_unclassified(75)	Eukaryota_unclassified(75)	Eukaryota_unclassified(75)	Eukaryota_unclassified(75)
Otu1791	4	Eukaryota(100)	Stramenopiles(100)	Stramenopiles_unclassified(75)	Stramenopiles_unclassified(75)	Stramenopiles_unclassified(75)	Stramenopiles_unclassified(75)	Stramenopiles_unclassified(75)	Stramenopiles_unclassified(75)
Otu1792	4	Eukaryota(100)	Archaeplastida(100)	Chlorophyta(75)	Pyramimonadales(75)	Pyramimonadales_X(75)	Pyramimonadales_XX(75)	Pterosperma(75)	Pterosperma_cristatum(75)
Otu1793	4	Eukaryota(100)	Eukaryota_unclassified(100)	Eukaryota_unclassified(100)	Eukaryota_unclassified(100)	Eukaryota_unclassified(100)	Eukaryota_unclassified(100)	Eukaryota_unclassified(100)	Eukaryota_unclassified(100)
Otu1794	4	Eukaryota(100)	Eukaryota_unclassified(100)	Eukaryota_unclassified(100)	Eukaryota_unclassified(100)	Eukaryota_unclassified(100)	Eukaryota_unclassified(100)	Eukaryota_unclassified(100)	Eukaryota_unclassified(100)
Otu1795	4	Eukaryota(100)	Eukaryota_unclassified(100)	Eukaryota_unclassified(100)	Eukaryota_unclassified(100)	Eukaryota_unclassified(100)	Eukaryota_unclassified(100)	Eukaryota_unclassified(100)	Eukaryota_unclassified(100)
Otu1796	4	Eukaryota(100)	Eukaryota_unclassified(100)	Eukaryota_unclassified(100)	Eukaryota_unclassified(100)	Eukaryota_unclassified(100)	Eukaryota_unclassified(100)	Eukaryota_unclassified(100)	Eukaryota_unclassified(100)
Otu1797	4	Eukaryota(100)	Alveolata(100)	Dinoflagellata(100)	Dinophyceae(100)	Gonyaulacales(100)	Goniodomataceae(100)	Alexandrium(100)	Alexandrium_unclassified(100)
Otu1798	3	Eukaryota(100)	Eukaryota_unclassified(100)	Eukaryota_unclassified(100)	Eukaryota_unclassified(100)	Eukaryota_unclassified(100)	Eukaryota_unclassified(100)	Eukaryota_unclassified(100)	Eukaryota_unclassified(100)
Otu1799	3	Eukaryota(100)	Archaeplastida(100)	Chlorophyta(100)	Mamiellophyceae(100)	Dolichomastigales(100)	Crustomastigaceae(100)	Crustomastix(100)	Crustomastix_didyma(100)
Otu1800	3	Eukaryota(100)	Alveolata(100)	Dinoflagellata(100)	Dinophyceae(100)	Gonyaulacales(100)	Goniodomataceae(100)	Alexandrium(100)	Alexandrium_unclassified(67)
Otu1801	3	Eukaryota(100)	Eukaryota_unclassified(100)	Eukaryota_unclassified(100)	Eukaryota_unclassified(100)	Eukaryota_unclassified(100)	Eukaryota_unclassified(100)	Eukaryota_unclassified(100)	Eukaryota_unclassified(100)
Otu1802	3	Eukaryota(100)	Eukaryota_unclassified(100)	Eukaryota_unclassified(100)	Eukaryota_unclassified(100)	Eukaryota_unclassified(100)	Eukaryota_unclassified(100)	Eukaryota_unclassified(100)	Eukaryota_unclassified(100)
Otu1803	3	Eukaryota(100)	Opisthokonta(100)	Metazoa(100)	Acanthocephala(100)	Acanthocephala_X(100)	Acanthocephala_XX(100)	Corynosoma(100)	Corynosoma_unclassified(100)
Otu1804	3	Eukaryota(100)	Opisthokonta(100)	Fungi(100)	Basidiomycota(100)	Agaricomycotina(100)	Agaricomycetes(100)	Trichaptum(100)	Trichaptum_unclassified(100)
Otu1805	3	Eukaryota(100)	Alveolata(100)	Dinoflagellata(100)	Dinophyceae(100)	Gonyaulacales(100)	Goniodomataceae(100)	Alexandrium(100)	Alexandrium_unclassified(100)
Otu1806	3	Eukaryota(100)	Eukaryota_unclassified(100)	Eukaryota_unclassified(100)	Eukaryota_unclassified(100)	Eukaryota_unclassified(100)	Eukaryota_unclassified(100)	Eukaryota_unclassified(100)	Eukaryota_unclassified(100)
Otu1807	3	Eukaryota(100)	Eukaryota_unclassified(100)	Eukaryota_unclassified(100)	Eukaryota_unclassified(100)	Eukaryota_unclassified(100)	Eukaryota_unclassified(100)	Eukaryota_unclassified(100)	Eukaryota_unclassified(100)
Otu1808	3	Eukaryota(100)	Eukaryota_unclassified(100)	Eukaryota_unclassified(100)	Eukaryota_unclassified(100)	Eukaryota_unclassified(100)	Eukaryota_unclassified(100)	Eukaryota_unclassified(100)	Eukaryota_unclassified(100)
Otu1809	3	Eukaryota(100)	Alveolata(100)	Dinoflagellata(100)	Dinophyceae(100)	Gonyaulacales(100)	Goniodomataceae(100)	Alexandrium(100)	Alexandrium_unclassified(100)
Otu1810	3	Eukaryota(100)	Eukaryota_unclassified(100)	Eukaryota_unclassified(100)	Eukaryota_unclassified(100)	Eukaryota_unclassified(100)	Eukaryota_unclassified(100)	Eukaryota_unclassified(100)	Eukaryota_unclassified(100)
Otu1811	3	Eukaryota(100)	Eukaryota_unclassified(67)	Eukaryota_unclassified(67)	Eukaryota_unclassified(67)	Eukaryota_unclassified(67)	Eukaryota_unclassified(67)	Eukaryota_unclassified(67)	Eukaryota_unclassified(67)
Otu1812	3	Eukaryota(100)	Eukaryota_unclassified(100)	Eukaryota_unclassified(100)	Eukaryota_unclassified(100)	Eukaryota_unclassified(100)	Eukaryota_unclassified(100)	Eukaryota_unclassified(100)	Eukaryota_unclassified(100)
Otu1813	3	Eukaryota(100)	Eukaryota_unclassified(100)	Eukaryota_unclassified(100)	Eukaryota_unclassified(100)	Eukaryota_unclassified(100)	Eukaryota_unclassified(100)	Eukaryota_unclassified(100)	Eukaryota_unclassified(100)
Otu1814	3	Eukaryota(100)	Eukaryota_unclassified(67)	Eukaryota_unclassified(67)	Eukaryota_unclassified(67)	Eukaryota_unclassified(67)	Eukaryota_unclassified(67)	Eukaryota_unclassified(67)	Eukaryota_unclassified(67)
Otu1815	3	Eukaryota(100)	Eukaryota_unclassified(100)	Eukaryota_unclassified(100)	Eukaryota_unclassified(100)	Eukaryota_unclassified(100)	Eukaryota_unclassified(100)	Eukaryota_unclassified(100)	Eukaryota_unclassified(100)
Otu1816	3	Eukaryota(100)	Opisthokonta(67)	Opisthokonta_unclassified(67)	Opisthokonta_unclassified(67)	Opisthokonta_unclassified(67)	Opisthokonta_unclassified(67)	Opisthokonta_unclassified(67)	Opisthokonta_unclassified(67)
Otu1817	3	Eukaryota(100)	Eukaryota_unclassified(100)	Eukaryota_unclassified(100)	Eukaryota_unclassified(100)	Eukaryota_unclassified(100)	Eukaryota_unclassified(100)	Eukaryota_unclassified(100)	Eukaryota_unclassified(100)
Otu1818	3	Eukaryota(100)	Opisthokonta(100)	Metazoa(100)	Acanthocephala(100)	Acanthocephala_X(100)	Acanthocephala_XX(100)	Acanthocephala_XX_unclassified(100)	Acanthocephala_XX_unclassified(100)
Otu1819	3	Eukaryota(100)	Eukaryota_unclassified(100)	Eukaryota_unclassified(100)	Eukaryota_unclassified(100)	Eukaryota_unclassified(100)	Eukaryota_unclassified(100)	Eukaryota_unclassified(100)	Eukaryota_unclassified(100)
Otu1820	3	Eukaryota(100)	Eukaryota_unclassified(100)	Eukaryota_unclassified(100)	Eukaryota_unclassified(100)	Eukaryota_unclassified(100)	Eukaryota_unclassified(100)	Eukaryota_unclassified(100)	Eukaryota_unclassified(100)
Otu1821	3	Eukaryota(100)	Opisthokonta(100)	Metazoa(100)	Arthropoda(100)	Crustacea(100)	Maxillopoda(100)	Maxillopoda_unclassified(100)	Maxillopoda_unclassified(100)
Otu1822	3	Eukaryota(100)	Stramenopiles(100)	Ochrophyta(100)	Ochrophyta_unclassified(100)	Ochrophyta_unclassified(100)	Ochrophyta_unclassified(100)	Ochrophyta_unclassified(100)	Ochrophyta_unclassified(100)
Otu1823	3	Eukaryota(100)	Eukaryota_unclassified(100)	Eukaryota_unclassified(100)	Eukaryota_unclassified(100)	Eukaryota_unclassified(100)	Eukaryota_unclassified(100)	Eukaryota_unclassified(100)	Eukaryota_unclassified(100)
Otu1824	3	Eukaryota(100)	Eukaryota_unclassified(67)	Eukaryota_unclassified(67)	Eukaryota_unclassified(67)	Eukaryota_unclassified(67)	Eukaryota_unclassified(67)	Eukaryota_unclassified(67)	Eukaryota_unclassified(67)
Otu1825	3	Eukaryota(100)	Opisthokonta(100)	Metazoa(100)	Mollusca(100)	Bivalvia(100)	Heteroconchia(100)	Heteroconchia_unclassified(67)	Heteroconchia_unclassified(67)
Otu1826	3	Eukaryota(100)	Eukaryota_unclassified(100)	Eukaryota_unclassified(100)	Eukaryota_unclassified(100)	Eukaryota_unclassified(100)	Eukaryota_unclassified(100)	Eukaryota_unclassified(100)	Eukaryota_unclassified(100)
Otu1827	3	Eukaryota(100)	Opisthokonta(67)	Opisthokonta_unclassified(67)	Opisthokonta_unclassified(67)	Opisthokonta_unclassified(67)	Opisthokonta_unclassified(67)	Opisthokonta_unclassified(67)	Opisthokonta_unclassified(67)
Otu1828	3	Eukaryota(100)	Opisthokonta(100)	Metazoa(100)	Mollusca(100)	Bivalvia(100)	Heteroconchia(100)	Vasticardium(67)	Vasticardium_enode(67)
Otu1829	3	Eukaryota(100)	Alveolata(100)	Dinoflagellata(100)	Dinophyceae(100)	Gonyaulacales(100)	Goniodomataceae(100)	Alexandrium(100)	Alexandrium_unclassified(100)
Otu1830	3	Eukaryota(100)	Eukaryota_unclassified(100)	Eukaryota_unclassified(100)	Eukaryota_unclassified(100)	Eukaryota_unclassified(100)	Eukaryota_unclassified(100)	Eukaryota_unclassified(100)	Eukaryota_unclassified(100)
Otu1831	3	Eukaryota(100)	Rhizaria(67)	Cercozoa(67)	Filosa-Thecofilosea(67)	Filosa-Thecofilosea_X(67)	Mataza-lineage(67)	Mataza-lineage_unclassified(67)	Mataza-lineage_unclassified(67)
Otu1832	3	Eukaryota(100)	Rhizaria(100)	Cercozoa(100)	Filosa-Thecofilosea(100)	Ebriida(100)	Ebriidae(100)	Ebria(100)	Ebria_tripartita(100)
Otu1833	3	Eukaryota(100)	Alveolata(100)	Ciliophora(100)	Ciliophora_unclassified(100)	Ciliophora_unclassified(100)	Ciliophora_unclassified(100)	Ciliophora_unclassified(100)	Ciliophora_unclassified(100)
Otu1834	3	Eukaryota(100)	Stramenopiles(100)	Ochrophyta(100)	Bacillariophyta(100)	Bacillariophyta_X(100)	Polar-centric-Mediophyceae(100)	Chaetoceros(100)	Chaetoceros_unclassified(100)
Otu1835	3	Eukaryota(100)	Eukaryota_unclassified(100)	Eukaryota_unclassified(100)	Eukaryota_unclassified(100)	Eukaryota_unclassified(100)	Eukaryota_unclassified(100)	Eukaryota_unclassified(100)	Eukaryota_unclassified(100)
Otu1836	3	Eukaryota(100)	Eukaryota_unclassified(100)	Eukaryota_unclassified(100)	Eukaryota_unclassified(100)	Eukaryota_unclassified(100)	Eukaryota_unclassified(100)	Eukaryota_unclassified(100)	Eukaryota_unclassified(100)
Otu1837	3	Eukaryota(100)	Eukaryota_unclassified(100)	Eukaryota_unclassified(100)	Eukaryota_unclassified(100)	Eukaryota_unclassified(100)	Eukaryota_unclassified(100)	Eukaryota_unclassified(100)	Eukaryota_unclassified(100)
Otu1838	3	Eukaryota(100)	Eukaryota_unclassified(100)	Eukaryota_unclassified(100)	Eukaryota_unclassified(100)	Eukaryota_unclassified(100)	Eukaryota_unclassified(100)	Eukaryota_unclassified(100)	Eukaryota_unclassified(100)
Otu1839	3	Eukaryota(100)	Opisthokonta(100)	Metazoa(100)	Platyhelminthes(100)	Trematoda(100)	Digenea(100)	Digenea_unclassified(100)	Digenea_unclassified(100)
Otu1840	3	Eukaryota(100)	Eukaryota_unclassified(100)	Eukaryota_unclassified(100)	Eukaryota_unclassified(100)	Eukaryota_unclassified(100)	Eukaryota_unclassified(100)	Eukaryota_unclassified(100)	Eukaryota_unclassified(100)
Otu1841	3	Eukaryota(100)	Opisthokonta(100)	Metazoa(100)	Platyhelminthes(100)	Cestoda(100)	Eucestoda(100)	Diphyllobothrium(100)	Diphyllobothrium_unclassified(100)
Otu1842	3	Eukaryota(100)	Eukaryota_unclassified(100)	Eukaryota_unclassified(100)	Eukaryota_unclassified(100)	Eukaryota_unclassified(100)	Eukaryota_unclassified(100)	Eukaryota_unclassified(100)	Eukaryota_unclassified(100)
Otu1843	3	Eukaryota(100)	Eukaryota_unclassified(100)	Eukaryota_unclassified(100)	Eukaryota_unclassified(100)	Eukaryota_unclassified(100)	Eukaryota_unclassified(100)	Eukaryota_unclassified(100)	Eukaryota_unclassified(100)
Otu1844	3	Eukaryota(100)	Alveolata(100)	Dinoflagellata(100)	Dinophyceae(100)	Gonyaulacales(100)	Goniodomataceae(100)	Alexandrium(100)	Alexandrium_unclassified(100)
Otu1845	3	Eukaryota(100)	Opisthokonta(100)	Metazoa(100)	Nematoda(100)	Chromadorea(100)	Chromadorea_X(100)	Strongyloides(100)	Strongyloides_unclassified(67)
Otu1846	3	Eukaryota(100)	Eukaryota_unclassified(100)	Eukaryota_unclassified(100)	Eukaryota_unclassified(100)	Eukaryota_unclassified(100)	Eukaryota_unclassified(100)	Eukaryota_unclassified(100)	Eukaryota_unclassified(100)
Otu1847	3	Eukaryota(100)	Opisthokonta(100)	Metazoa(100)	Mollusca(100)	Bivalvia(100)	Heteroconchia(100)	Hiatella(100)	Hiatella_unclassified(100)
Otu1848	3	Eukaryota(100)	Rhizaria(100)	Cercozoa(100)	Filosa-Thecofilosea(100)	Cryomonadida(67)	Cryomonadida_unclassified(67)	Cryomonadida_unclassified(67)	Cryomonadida_unclassified(67)
Otu1849	3	Eukaryota(100)	Alveolata(100)	Dinoflagellata(100)	Dinophyceae(100)	Gonyaulacales(100)	Goniodomataceae(100)	Alexandrium(100)	Alexandrium_unclassified(67)
Otu1850	3	Eukaryota(100)	Eukaryota_unclassified(100)	Eukaryota_unclassified(100)	Eukaryota_unclassified(100)	Eukaryota_unclassified(100)	Eukaryota_unclassified(100)	Eukaryota_unclassified(100)	Eukaryota_unclassified(100)
Otu1851	3	Eukaryota(100)	Eukaryota_unclassified(100)	Eukaryota_unclassified(100)	Eukaryota_unclassified(100)	Eukaryota_unclassified(100)	Eukaryota_unclassified(100)	Eukaryota_unclassified(100)	Eukaryota_unclassified(100)
Otu1852	3	Eukaryota(100)	Eukaryota_unclassified(100)	Eukaryota_unclassified(100)	Eukaryota_unclassified(100)	Eukaryota_unclassified(100)	Eukaryota_unclassified(100)	Eukaryota_unclassified(100)	Eukaryota_unclassified(100)
Otu1853	3	Eukaryota(100)	Opisthokonta(100)	Metazoa(100)	Platyhelminthes(100)	Trematoda(100)	Digenea(100)	Digenea_unclassified(100)	Digenea_unclassified(100)
Otu1854	3	Eukaryota(100)	Eukaryota_unclassified(100)	Eukaryota_unclassified(100)	Eukaryota_unclassified(100)	Eukaryota_unclassified(100)	Eukaryota_unclassified(100)	Eukaryota_unclassified(100)	Eukaryota_unclassified(100)
Otu1855	3	Eukaryota(100)	Rhizaria(100)	Cercozoa(100)	Filosa-Thecofilosea(100)	Cryomonadida(100)	Cryomonadida_unclassified(100)	Cryomonadida_unclassified(100)	Cryomonadida_unclassified(100)
Otu1856	3	Eukaryota(100)	Eukaryota_unclassified(100)	Eukaryota_unclassified(100)	Eukaryota_unclassified(100)	Eukaryota_unclassified(100)	Eukaryota_unclassified(100)	Eukaryota_unclassified(100)	Eukaryota_unclassified(100)
Otu1857	3	Eukaryota(100)	Eukaryota_unclassified(100)	Eukaryota_unclassified(100)	Eukaryota_unclassified(100)	Eukaryota_unclassified(100)	Eukaryota_unclassified(100)	Eukaryota_unclassified(100)	Eukaryota_unclassified(100)
Otu1858	3	Eukaryota(100)	Eukaryota_unclassified(100)	Eukaryota_unclassified(100)	Eukaryota_unclassified(100)	Eukaryota_unclassified(100)	Eukaryota_unclassified(100)	Eukaryota_unclassified(100)	Eukaryota_unclassified(100)
Otu1859	3	Eukaryota(100)	Eukaryota_unclassified(100)	Eukaryota_unclassified(100)	Eukaryota_unclassified(100)	Eukaryota_unclassified(100)	Eukaryota_unclassified(100)	Eukaryota_unclassified(100)	Eukaryota_unclassified(100)
Otu1860	3	Eukaryota(100)	Alveolata(100)	Dinoflagellata(100)	Dinophyceae(100)	Gonyaulacales(100)	Goniodomataceae(100)	Alexandrium(100)	Alexandrium_unclassified(100)
Otu1861	3	Eukaryota(100)	Eukaryota_unclassified(100)	Eukaryota_unclassified(100)	Eukaryota_unclassified(100)	Eukaryota_unclassified(100)	Eukaryota_unclassified(100)	Eukaryota_unclassified(100)	Eukaryota_unclassified(100)
Otu1862	3	Eukaryota(100)	Alveolata(100)	Dinoflagellata(100)	Dinophyceae(100)	Gonyaulacales(100)	Goniodomataceae(100)	Alexandrium(100)	Alexandrium_unclassified(100)
Otu1863	3	Eukaryota(100)	Opisthokonta(100)	Metazoa(100)	Platyhelminthes(100)	Trematoda(100)	Digenea(100)	Digenea_unclassified(100)	Digenea_unclassified(100)
Otu1864	3	Eukaryota(100)	Eukaryota_unclassified(100)	Eukaryota_unclassified(100)	Eukaryota_unclassified(100)	Eukaryota_unclassified(100)	Eukaryota_unclassified(100)	Eukaryota_unclassified(100)	Eukaryota_unclassified(100)
Otu1865	3	Eukaryota(100)	Eukaryota_unclassified(100)	Eukaryota_unclassified(100)	Eukaryota_unclassified(100)	Eukaryota_unclassified(100)	Eukaryota_unclassified(100)	Eukaryota_unclassified(100)	Eukaryota_unclassified(100)
Otu1866	3	Eukaryota(100)	Eukaryota_unclassified(100)	Eukaryota_unclassified(100)	Eukaryota_unclassified(100)	Eukaryota_unclassified(100)	Eukaryota_unclassified(100)	Eukaryota_unclassified(100)	Eukaryota_unclassified(100)
Otu1867	3	Eukaryota(100)	Stramenopiles(100)	Sagenista(100)	MAST-9(100)	MAST-9C(100)	MAST-9C_X(100)	MAST-9C_XX(100)	MAST-9C_XX_sp.(100)
Otu1868	3	Eukaryota(100)	Eukaryota_unclassified(100)	Eukaryota_unclassified(100)	Eukaryota_unclassified(100)	Eukaryota_unclassified(100)	Eukaryota_unclassified(100)	Eukaryota_unclassified(100)	Eukaryota_unclassified(100)
Otu1869	3	Eukaryota(100)	Opisthokonta(100)	Metazoa(100)	Mollusca(100)	Bivalvia(100)	Heteroconchia(100)	Heteroconchia_unclassified(100)	Heteroconchia_unclassified(100)
Otu1870	3	Eukaryota(100)	Eukaryota_unclassified(100)	Eukaryota_unclassified(100)	Eukaryota_unclassified(100)	Eukaryota_unclassified(100)	Eukaryota_unclassified(100)	Eukaryota_unclassified(100)	Eukaryota_unclassified(100)
Otu1871	3	Eukaryota(100)	Opisthokonta(100)	Metazoa(100)	Nemertea(100)	Nemertea_X(100)	Nemertea_XX(100)	Nemertea_XX_unclassified(100)	Nemertea_XX_unclassified(100)
Otu1872	3	Eukaryota(100)	Eukaryota_unclassified(100)	Eukaryota_unclassified(100)	Eukaryota_unclassified(100)	Eukaryota_unclassified(100)	Eukaryota_unclassified(100)	Eukaryota_unclassified(100)	Eukaryota_unclassified(100)
Otu1873	3	Eukaryota(100)	Eukaryota_unclassified(100)	Eukaryota_unclassified(100)	Eukaryota_unclassified(100)	Eukaryota_unclassified(100)	Eukaryota_unclassified(100)	Eukaryota_unclassified(100)	Eukaryota_unclassified(100)
Otu1874	3	Eukaryota(100)	Alveolata(100)	Dinoflagellata(100)	Dinophyceae(67)	Dinophyceae_unclassified(67)	Dinophyceae_unclassified(67)	Dinophyceae_unclassified(67)	Dinophyceae_unclassified(67)
Otu1875	3	Eukaryota(100)	Eukaryota_unclassified(100)	Eukaryota_unclassified(100)	Eukaryota_unclassified(100)	Eukaryota_unclassified(100)	Eukaryota_unclassified(100)	Eukaryota_unclassified(100)	Eukaryota_unclassified(100)
Otu1876	3	Eukaryota(100)	Eukaryota_unclassified(100)	Eukaryota_unclassified(100)	Eukaryota_unclassified(100)	Eukaryota_unclassified(100)	Eukaryota_unclassified(100)	Eukaryota_unclassified(100)	Eukaryota_unclassified(100)
Otu1877	3	Eukaryota(100)	Eukaryota_unclassified(100)	Eukaryota_unclassified(100)	Eukaryota_unclassified(100)	Eukaryota_unclassified(100)	Eukaryota_unclassified(100)	Eukaryota_unclassified(100)	Eukaryota_unclassified(100)
Otu1878	3	Eukaryota(100)	Rhizaria(100)	Cercozoa(100)	Filosa-Thecofilosea(100)	Ventricleftida(100)	CCW10-lineage(100)	CCW10-lineage_X(100)	CCW10-lineage_X_sp.(100)
Otu1879	3	Eukaryota(100)	Eukaryota_unclassified(100)	Eukaryota_unclassified(100)	Eukaryota_unclassified(100)	Eukaryota_unclassified(100)	Eukaryota_unclassified(100)	Eukaryota_unclassified(100)	Eukaryota_unclassified(100)
Otu1880	3	Eukaryota(100)	Eukaryota_unclassified(100)	Eukaryota_unclassified(100)	Eukaryota_unclassified(100)	Eukaryota_unclassified(100)	Eukaryota_unclassified(100)	Eukaryota_unclassified(100)	Eukaryota_unclassified(100)
Otu1881	3	Eukaryota(100)	Eukaryota_unclassified(100)	Eukaryota_unclassified(100)	Eukaryota_unclassified(100)	Eukaryota_unclassified(100)	Eukaryota_unclassified(100)	Eukaryota_unclassified(100)	Eukaryota_unclassified(100)
Otu1882	3	Eukaryota(100)	Stramenopiles(100)	Ochrophyta(100)	Ochrophyta_unclassified(100)	Ochrophyta_unclassified(100)	Ochrophyta_unclassified(100)	Ochrophyta_unclassified(100)	Ochrophyta_unclassified(100)
Otu1883	3	Eukaryota(100)	Archaeplastida(100)	Archaeplastida_unclassified(100)	Archaeplastida_unclassified(100)	Archaeplastida_unclassified(100)	Archaeplastida_unclassified(100)	Archaeplastida_unclassified(100)	Archaeplastida_unclassified(100)
Otu1884	3	Eukaryota(100)	Stramenopiles(67)	Stramenopiles_unclassified(67)	Stramenopiles_unclassified(67)	Stramenopiles_unclassified(67)	Stramenopiles_unclassified(67)	Stramenopiles_unclassified(67)	Stramenopiles_unclassified(67)
Otu1885	3	Eukaryota(100)	Opisthokonta(100)	Metazoa(100)	Platyhelminthes(100)	Cestoda(100)	Eucestoda(100)	Diphyllobothrium(100)	Diphyllobothrium_unclassified(100)
Otu1886	3	Eukaryota(100)	Eukaryota_unclassified(100)	Eukaryota_unclassified(100)	Eukaryota_unclassified(100)	Eukaryota_unclassified(100)	Eukaryota_unclassified(100)	Eukaryota_unclassified(100)	Eukaryota_unclassified(100)
Otu1887	3	Eukaryota(100)	Eukaryota_unclassified(100)	Eukaryota_unclassified(100)	Eukaryota_unclassified(100)	Eukaryota_unclassified(100)	Eukaryota_unclassified(100)	Eukaryota_unclassified(100)	Eukaryota_unclassified(100)
Otu1888	3	Eukaryota(100)	Opisthokonta(100)	Opisthokonta_unclassified(100)	Opisthokonta_unclassified(100)	Opisthokonta_unclassified(100)	Opisthokonta_unclassified(100)	Opisthokonta_unclassified(100)	Opisthokonta_unclassified(100)
Otu1889	3	Eukaryota(100)	Eukaryota_unclassified(100)	Eukaryota_unclassified(100)	Eukaryota_unclassified(100)	Eukaryota_unclassified(100)	Eukaryota_unclassified(100)	Eukaryota_unclassified(100)	Eukaryota_unclassified(100)
Otu1890	3	Eukaryota(100)	Eukaryota_unclassified(100)	Eukaryota_unclassified(100)	Eukaryota_unclassified(100)	Eukaryota_unclassified(100)	Eukaryota_unclassified(100)	Eukaryota_unclassified(100)	Eukaryota_unclassified(100)
Otu1891	3	Eukaryota(100)	Eukaryota_unclassified(100)	Eukaryota_unclassified(100)	Eukaryota_unclassified(100)	Eukaryota_unclassified(100)	Eukaryota_unclassified(100)	Eukaryota_unclassified(100)	Eukaryota_unclassified(100)
Otu1892	3	Eukaryota(100)	Eukaryota_unclassified(100)	Eukaryota_unclassified(100)	Eukaryota_unclassified(100)	Eukaryota_unclassified(100)	Eukaryota_unclassified(100)	Eukaryota_unclassified(100)	Eukaryota_unclassified(100)
Otu1893	3	Eukaryota(100)	Eukaryota_unclassified(100)	Eukaryota_unclassified(100)	Eukaryota_unclassified(100)	Eukaryota_unclassified(100)	Eukaryota_unclassified(100)	Eukaryota_unclassified(100)	Eukaryota_unclassified(100)
Otu1894	3	Eukaryota(100)	Eukaryota_unclassified(100)	Eukaryota_unclassified(100)	Eukaryota_unclassified(100)	Eukaryota_unclassified(100)	Eukaryota_unclassified(100)	Eukaryota_unclassified(100)	Eukaryota_unclassified(100)
Otu1895	3	Eukaryota(100)	Stramenopiles(67)	Stramenopiles_unclassified(67)	Stramenopiles_unclassified(67)	Stramenopiles_unclassified(67)	Stramenopiles_unclassified(67)	Stramenopiles_unclassified(67)	Stramenopiles_unclassified(67)
Otu1896	3	Eukaryota(100)	Alveolata(100)	Dinoflagellata(100)	Dinophyceae(100)	Gonyaulacales(100)	Goniodomataceae(100)	Alexandrium(100)	Alexandrium_unclassified(100)
Otu1897	3	Eukaryota(100)	Eukaryota_unclassified(100)	Eukaryota_unclassified(100)	Eukaryota_unclassified(100)	Eukaryota_unclassified(100)	Eukaryota_unclassified(100)	Eukaryota_unclassified(100)	Eukaryota_unclassified(100)
Otu1898	3	Eukaryota(100)	Opisthokonta(100)	Metazoa(100)	Platyhelminthes(100)	Trematoda(100)	Digenea(100)	Digenea_unclassified(100)	Digenea_unclassified(100)
Otu1899	3	Eukaryota(100)	Eukaryota_unclassified(100)	Eukaryota_unclassified(100)	Eukaryota_unclassified(100)	Eukaryota_unclassified(100)	Eukaryota_unclassified(100)	Eukaryota_unclassified(100)	Eukaryota_unclassified(100)
Otu1900	3	Eukaryota(100)	Alveolata(100)	Dinoflagellata(100)	Dinophyceae(100)	Gonyaulacales(100)	Goniodomataceae(100)	Alexandrium(100)	Alexandrium_unclassified(100)
Otu1901	3	Eukaryota(100)	Eukaryota_unclassified(67)	Eukaryota_unclassified(67)	Eukaryota_unclassified(67)	Eukaryota_unclassified(67)	Eukaryota_unclassified(67)	Eukaryota_unclassified(67)	Eukaryota_unclassified(67)
Otu1902	3	Eukaryota(100)	Eukaryota_unclassified(100)	Eukaryota_unclassified(100)	Eukaryota_unclassified(100)	Eukaryota_unclassified(100)	Eukaryota_unclassified(100)	Eukaryota_unclassified(100)	Eukaryota_unclassified(100)
Otu1903	3	Eukaryota(100)	Eukaryota_unclassified(100)	Eukaryota_unclassified(100)	Eukaryota_unclassified(100)	Eukaryota_unclassified(100)	Eukaryota_unclassified(100)	Eukaryota_unclassified(100)	Eukaryota_unclassified(100)
Otu1904	3	Eukaryota(100)	Eukaryota_unclassified(100)	Eukaryota_unclassified(100)	Eukaryota_unclassified(100)	Eukaryota_unclassified(100)	Eukaryota_unclassified(100)	Eukaryota_unclassified(100)	Eukaryota_unclassified(100)
Otu1905	3	Eukaryota(100)	Eukaryota_unclassified(100)	Eukaryota_unclassified(100)	Eukaryota_unclassified(100)	Eukaryota_unclassified(100)	Eukaryota_unclassified(100)	Eukaryota_unclassified(100)	Eukaryota_unclassified(100)
Otu1906	3	Eukaryota(100)	Alveolata(100)	Dinoflagellata(100)	Dinophyceae(100)	Gonyaulacales(100)	Goniodomataceae(100)	Alexandrium(100)	Alexandrium_unclassified(67)
Otu1907	3	Eukaryota(100)	Eukaryota_unclassified(100)	Eukaryota_unclassified(100)	Eukaryota_unclassified(100)	Eukaryota_unclassified(100)	Eukaryota_unclassified(100)	Eukaryota_unclassified(100)	Eukaryota_unclassified(100)
Otu1908	3	Eukaryota(100)	Eukaryota_unclassified(100)	Eukaryota_unclassified(100)	Eukaryota_unclassified(100)	Eukaryota_unclassified(100)	Eukaryota_unclassified(100)	Eukaryota_unclassified(100)	Eukaryota_unclassified(100)
Otu1909	3	Eukaryota(100)	Eukaryota_unclassified(100)	Eukaryota_unclassified(100)	Eukaryota_unclassified(100)	Eukaryota_unclassified(100)	Eukaryota_unclassified(100)	Eukaryota_unclassified(100)	Eukaryota_unclassified(100)
Otu1910	3	Eukaryota(100)	Eukaryota_unclassified(100)	Eukaryota_unclassified(100)	Eukaryota_unclassified(100)	Eukaryota_unclassified(100)	Eukaryota_unclassified(100)	Eukaryota_unclassified(100)	Eukaryota_unclassified(100)
Otu1911	3	Eukaryota(100)	Alveolata(100)	Dinoflagellata(100)	Dinophyceae(100)	Gonyaulacales(100)	Goniodomataceae(100)	Alexandrium(100)	Alexandrium_fundyense(67)
Otu1912	3	Eukaryota(100)	Eukaryota_unclassified(100)	Eukaryota_unclassified(100)	Eukaryota_unclassified(100)	Eukaryota_unclassified(100)	Eukaryota_unclassified(100)	Eukaryota_unclassified(100)	Eukaryota_unclassified(100)
Otu1913	3	Eukaryota(100)	Eukaryota_unclassified(67)	Eukaryota_unclassified(67)	Eukaryota_unclassified(67)	Eukaryota_unclassified(67)	Eukaryota_unclassified(67)	Eukaryota_unclassified(67)	Eukaryota_unclassified(67)
Otu1914	3	Eukaryota(100)	Eukaryota_unclassified(100)	Eukaryota_unclassified(100)	Eukaryota_unclassified(100)	Eukaryota_unclassified(100)	Eukaryota_unclassified(100)	Eukaryota_unclassified(100)	Eukaryota_unclassified(100)
Otu1915	3	Eukaryota(100)	Opisthokonta(100)	Metazoa(100)	Platyhelminthes(100)	Trematoda(100)	Digenea(100)	Digenea_unclassified(100)	Digenea_unclassified(100)
Otu1916	3	Eukaryota(100)	Alveolata(100)	Ciliophora(100)	Colpodea(100)	Colpodea_X(100)	Colpodida(100)	Colpodida_unclassified(100)	Colpodida_unclassified(100)
Otu1917	3	Eukaryota(100)	Opisthokonta(100)	Fungi(100)	Fungi_unclassified(100)	Fungi_unclassified(100)	Fungi_unclassified(100)	Fungi_unclassified(100)	Fungi_unclassified(100)
Otu1918	3	Eukaryota(100)	Alveolata(67)	Dinoflagellata(67)	Dinoflagellata_unclassified(67)	Dinoflagellata_unclassified(67)	Dinoflagellata_unclassified(67)	Dinoflagellata_unclassified(67)	Dinoflagellata_unclassified(67)
Otu1919	3	Eukaryota(100)	Eukaryota_unclassified(100)	Eukaryota_unclassified(100)	Eukaryota_unclassified(100)	Eukaryota_unclassified(100)	Eukaryota_unclassified(100)	Eukaryota_unclassified(100)	Eukaryota_unclassified(100)
Otu1920	3	Eukaryota(100)	Eukaryota_unclassified(100)	Eukaryota_unclassified(100)	Eukaryota_unclassified(100)	Eukaryota_unclassified(100)	Eukaryota_unclassified(100)	Eukaryota_unclassified(100)	Eukaryota_unclassified(100)
Otu1921	3	Eukaryota(100)	Eukaryota_unclassified(100)	Eukaryota_unclassified(100)	Eukaryota_unclassified(100)	Eukaryota_unclassified(100)	Eukaryota_unclassified(100)	Eukaryota_unclassified(100)	Eukaryota_unclassified(100)
Otu1922	3	Eukaryota(100)	Alveolata(100)	Dinoflagellata(100)	Dinophyceae(100)	Gonyaulacales(100)	Goniodomataceae(100)	Alexandrium(100)	Alexandrium_unclassified(100)
Otu1923	3	Eukaryota(100)	Alveolata(100)	Dinoflagellata(100)	Dinophyceae(100)	Peridiniales(100)	Protoperidiniaceae(100)	Protoperidinium(100)	Protoperidinium_monovelum(100)
Otu1924	3	Eukaryota(100)	Opisthokonta(100)	Metazoa(100)	Craniata(100)	Craniata_X(100)	Craniata_X_unclassified(100)	Craniata_X_unclassified(100)	Craniata_X_unclassified(100)
Otu1925	3	Eukaryota(100)	Rhizaria(100)	Cercozoa(100)	Filosa-Imbricatea(100)	Thaumatomonadida(100)	Thaumatomonadidae(100)	Reckertia(100)	Reckertia_filosa(100)
Otu1926	3	Eukaryota(100)	Eukaryota_unclassified(100)	Eukaryota_unclassified(100)	Eukaryota_unclassified(100)	Eukaryota_unclassified(100)	Eukaryota_unclassified(100)	Eukaryota_unclassified(100)	Eukaryota_unclassified(100)
Otu1927	3	Eukaryota(100)	Eukaryota_unclassified(100)	Eukaryota_unclassified(100)	Eukaryota_unclassified(100)	Eukaryota_unclassified(100)	Eukaryota_unclassified(100)	Eukaryota_unclassified(100)	Eukaryota_unclassified(100)
Otu1928	3	Eukaryota(100)	Eukaryota_unclassified(100)	Eukaryota_unclassified(100)	Eukaryota_unclassified(100)	Eukaryota_unclassified(100)	Eukaryota_unclassified(100)	Eukaryota_unclassified(100)	Eukaryota_unclassified(100)
Otu1929	3	Eukaryota(100)	Opisthokonta(100)	Metazoa(100)	Mollusca(100)	Gastropoda(100)	Nudibranchia(100)	Nudibranchia_unclassified(100)	Nudibranchia_unclassified(100)
Otu1930	3	Eukaryota(100)	Eukaryota_unclassified(100)	Eukaryota_unclassified(100)	Eukaryota_unclassified(100)	Eukaryota_unclassified(100)	Eukaryota_unclassified(100)	Eukaryota_unclassified(100)	Eukaryota_unclassified(100)
Otu1931	3	Eukaryota(100)	Eukaryota_unclassified(100)	Eukaryota_unclassified(100)	Eukaryota_unclassified(100)	Eukaryota_unclassified(100)	Eukaryota_unclassified(100)	Eukaryota_unclassified(100)	Eukaryota_unclassified(100)
Otu1932	3	Eukaryota(100)	Opisthokonta(100)	Metazoa(100)	Platyhelminthes(100)	Trematoda(100)	Digenea(67)	Digenea_unclassified(67)	Digenea_unclassified(67)
Otu1933	3	Eukaryota(100)	Eukaryota_unclassified(100)	Eukaryota_unclassified(100)	Eukaryota_unclassified(100)	Eukaryota_unclassified(100)	Eukaryota_unclassified(100)	Eukaryota_unclassified(100)	Eukaryota_unclassified(100)
Otu1934	3	Eukaryota(100)	Eukaryota_unclassified(100)	Eukaryota_unclassified(100)	Eukaryota_unclassified(100)	Eukaryota_unclassified(100)	Eukaryota_unclassified(100)	Eukaryota_unclassified(100)	Eukaryota_unclassified(100)
Otu1935	3	Eukaryota(100)	Opisthokonta(100)	Metazoa(100)	Acanthocephala(100)	Acanthocephala_X(100)	Acanthocephala_XX(100)	Acanthocephala_XX_unclassified(100)	Acanthocephala_XX_unclassified(100)
Otu1936	3	Eukaryota(100)	Rhizaria(67)	Cercozoa(67)	Cercozoa_unclassified(67)	Cercozoa_unclassified(67)	Cercozoa_unclassified(67)	Cercozoa_unclassified(67)	Cercozoa_unclassified(67)
Otu1937	3	Eukaryota(100)	Archaeplastida(100)	Archaeplastida_unclassified(100)	Archaeplastida_unclassified(100)	Archaeplastida_unclassified(100)	Archaeplastida_unclassified(100)	Archaeplastida_unclassified(100)	Archaeplastida_unclassified(100)
Otu1938	3	Eukaryota(100)	Eukaryota_unclassified(100)	Eukaryota_unclassified(100)	Eukaryota_unclassified(100)	Eukaryota_unclassified(100)	Eukaryota_unclassified(100)	Eukaryota_unclassified(100)	Eukaryota_unclassified(100)
Otu1939	3	Eukaryota(100)	Eukaryota_unclassified(100)	Eukaryota_unclassified(100)	Eukaryota_unclassified(100)	Eukaryota_unclassified(100)	Eukaryota_unclassified(100)	Eukaryota_unclassified(100)	Eukaryota_unclassified(100)
Otu1940	3	Eukaryota(100)	Eukaryota_unclassified(100)	Eukaryota_unclassified(100)	Eukaryota_unclassified(100)	Eukaryota_unclassified(100)	Eukaryota_unclassified(100)	Eukaryota_unclassified(100)	Eukaryota_unclassified(100)
Otu1941	3	Eukaryota(100)	Eukaryota_unclassified(100)	Eukaryota_unclassified(100)	Eukaryota_unclassified(100)	Eukaryota_unclassified(100)	Eukaryota_unclassified(100)	Eukaryota_unclassified(100)	Eukaryota_unclassified(100)
Otu1942	3	Eukaryota(100)	Eukaryota_unclassified(100)	Eukaryota_unclassified(100)	Eukaryota_unclassified(100)	Eukaryota_unclassified(100)	Eukaryota_unclassified(100)	Eukaryota_unclassified(100)	Eukaryota_unclassified(100)
Otu1943	3	Eukaryota(100)	Archaeplastida(67)	Chlorophyta(67)	Mamiellophyceae(67)	Dolichomastigales(67)	Dolichomastigaceae(67)	Dolichomastigaceae-B(67)	Dolichomastigaceae-B_sp.(67)
Otu1944	3	Eukaryota(100)	Eukaryota_unclassified(100)	Eukaryota_unclassified(100)	Eukaryota_unclassified(100)	Eukaryota_unclassified(100)	Eukaryota_unclassified(100)	Eukaryota_unclassified(100)	Eukaryota_unclassified(100)
Otu1945	3	Eukaryota(100)	Opisthokonta(100)	Metazoa(100)	Mollusca(100)	Gastropoda(100)	Gastropoda_unclassified(100)	Gastropoda_unclassified(100)	Gastropoda_unclassified(100)
Otu1946	3	Eukaryota(100)	Eukaryota_unclassified(100)	Eukaryota_unclassified(100)	Eukaryota_unclassified(100)	Eukaryota_unclassified(100)	Eukaryota_unclassified(100)	Eukaryota_unclassified(100)	Eukaryota_unclassified(100)
Otu1947	3	Eukaryota(100)	Eukaryota_unclassified(100)	Eukaryota_unclassified(100)	Eukaryota_unclassified(100)	Eukaryota_unclassified(100)	Eukaryota_unclassified(100)	Eukaryota_unclassified(100)	Eukaryota_unclassified(100)
Otu1948	3	Eukaryota(100)	Eukaryota_unclassified(100)	Eukaryota_unclassified(100)	Eukaryota_unclassified(100)	Eukaryota_unclassified(100)	Eukaryota_unclassified(100)	Eukaryota_unclassified(100)	Eukaryota_unclassified(100)
Otu1949	3	Eukaryota(100)	Opisthokonta(100)	Metazoa(100)	Platyhelminthes(100)	Trematoda(100)	Digenea(100)	Digenea_unclassified(100)	Digenea_unclassified(100)
Otu1950	3	Eukaryota(100)	Eukaryota_unclassified(100)	Eukaryota_unclassified(100)	Eukaryota_unclassified(100)	Eukaryota_unclassified(100)	Eukaryota_unclassified(100)	Eukaryota_unclassified(100)	Eukaryota_unclassified(100)
Otu1951	3	Eukaryota(100)	Opisthokonta(100)	Metazoa(100)	Mollusca(100)	Bivalvia(100)	Heteroconchia(100)	Hiatella(100)	Hiatella_unclassified(67)
Otu1952	3	Eukaryota(100)	Eukaryota_unclassified(100)	Eukaryota_unclassified(100)	Eukaryota_unclassified(100)	Eukaryota_unclassified(100)	Eukaryota_unclassified(100)	Eukaryota_unclassified(100)	Eukaryota_unclassified(100)
Otu1953	3	Eukaryota(100)	Eukaryota_unclassified(100)	Eukaryota_unclassified(100)	Eukaryota_unclassified(100)	Eukaryota_unclassified(100)	Eukaryota_unclassified(100)	Eukaryota_unclassified(100)	Eukaryota_unclassified(100)
Otu1954	3	Eukaryota(100)	Opisthokonta(100)	Metazoa(100)	Platyhelminthes(100)	Trematoda(100)	Digenea(100)	Digenea_unclassified(100)	Digenea_unclassified(100)
Otu1955	3	Eukaryota(100)	Eukaryota_unclassified(100)	Eukaryota_unclassified(100)	Eukaryota_unclassified(100)	Eukaryota_unclassified(100)	Eukaryota_unclassified(100)	Eukaryota_unclassified(100)	Eukaryota_unclassified(100)
Otu1956	3	Eukaryota(100)	Eukaryota_unclassified(100)	Eukaryota_unclassified(100)	Eukaryota_unclassified(100)	Eukaryota_unclassified(100)	Eukaryota_unclassified(100)	Eukaryota_unclassified(100)	Eukaryota_unclassified(100)
Otu1957	3	Eukaryota(100)	Alveolata(100)	Alveolata_unclassified(100)	Alveolata_unclassified(100)	Alveolata_unclassified(100)	Alveolata_unclassified(100)	Alveolata_unclassified(100)	Alveolata_unclassified(100)
Otu1958	3	Eukaryota(100)	Eukaryota_unclassified(100)	Eukaryota_unclassified(100)	Eukaryota_unclassified(100)	Eukaryota_unclassified(100)	Eukaryota_unclassified(100)	Eukaryota_unclassified(100)	Eukaryota_unclassified(100)
Otu1959	3	Eukaryota(100)	Eukaryota_unclassified(100)	Eukaryota_unclassified(100)	Eukaryota_unclassified(100)	Eukaryota_unclassified(100)	Eukaryota_unclassified(100)	Eukaryota_unclassified(100)	Eukaryota_unclassified(100)
Otu1960	3	Eukaryota(100)	Opisthokonta(100)	Metazoa(100)	Platyhelminthes(100)	Trematoda(100)	Digenea(100)	Digenea_unclassified(100)	Digenea_unclassified(100)
Otu1961	3	Eukaryota(100)	Opisthokonta(100)	Metazoa(100)	Arthropoda(100)	Crustacea(100)	Maxillopoda(100)	Centropages(100)	Centropages_unclassified(100)
Otu1962	3	Eukaryota(100)	Opisthokonta(100)	Metazoa(100)	Acanthocephala(100)	Acanthocephala_X(100)	Acanthocephala_XX(100)	Acanthocephala_XX_unclassified(67)	Acanthocephala_XX_unclassified(67)
Otu1963	3	Eukaryota(100)	Eukaryota_unclassified(100)	Eukaryota_unclassified(100)	Eukaryota_unclassified(100)	Eukaryota_unclassified(100)	Eukaryota_unclassified(100)	Eukaryota_unclassified(100)	Eukaryota_unclassified(100)
Otu1964	3	Eukaryota(100)	Eukaryota_unclassified(100)	Eukaryota_unclassified(100)	Eukaryota_unclassified(100)	Eukaryota_unclassified(100)	Eukaryota_unclassified(100)	Eukaryota_unclassified(100)	Eukaryota_unclassified(100)
Otu1965	3	Eukaryota(100)	Eukaryota_unclassified(100)	Eukaryota_unclassified(100)	Eukaryota_unclassified(100)	Eukaryota_unclassified(100)	Eukaryota_unclassified(100)	Eukaryota_unclassified(100)	Eukaryota_unclassified(100)
Otu1966	3	Eukaryota(100)	Eukaryota_unclassified(100)	Eukaryota_unclassified(100)	Eukaryota_unclassified(100)	Eukaryota_unclassified(100)	Eukaryota_unclassified(100)	Eukaryota_unclassified(100)	Eukaryota_unclassified(100)
Otu1967	3	Eukaryota(100)	Eukaryota_unclassified(67)	Eukaryota_unclassified(67)	Eukaryota_unclassified(67)	Eukaryota_unclassified(67)	Eukaryota_unclassified(67)	Eukaryota_unclassified(67)	Eukaryota_unclassified(67)
Otu1968	3	Eukaryota(100)	Eukaryota_unclassified(100)	Eukaryota_unclassified(100)	Eukaryota_unclassified(100)	Eukaryota_unclassified(100)	Eukaryota_unclassified(100)	Eukaryota_unclassified(100)	Eukaryota_unclassified(100)
Otu1969	3	Eukaryota(100)	Opisthokonta(100)	Metazoa(100)	Platyhelminthes(100)	Trematoda(100)	Trematoda_unclassified(67)	Trematoda_unclassified(67)	Trematoda_unclassified(67)
Otu1970	3	Eukaryota(100)	Opisthokonta(100)	Metazoa(100)	Cnidaria(100)	Cnidaria_X(100)	Anthozoa(100)	Edwardsia(100)	Edwardsia_japonica(100)
Otu1971	3	Eukaryota(100)	Eukaryota_unclassified(100)	Eukaryota_unclassified(100)	Eukaryota_unclassified(100)	Eukaryota_unclassified(100)	Eukaryota_unclassified(100)	Eukaryota_unclassified(100)	Eukaryota_unclassified(100)
Otu1972	3	Eukaryota(100)	Eukaryota_unclassified(100)	Eukaryota_unclassified(100)	Eukaryota_unclassified(100)	Eukaryota_unclassified(100)	Eukaryota_unclassified(100)	Eukaryota_unclassified(100)	Eukaryota_unclassified(100)
Otu1973	3	Eukaryota(100)	Eukaryota_unclassified(100)	Eukaryota_unclassified(100)	Eukaryota_unclassified(100)	Eukaryota_unclassified(100)	Eukaryota_unclassified(100)	Eukaryota_unclassified(100)	Eukaryota_unclassified(100)
[truncated: 3,275 more rows]
